# Supplementary material for: How Aromatic Are Molecular Nanorings? The Case of a Six‐Porphyrin Nanoring
Source: PubMed Central journal article supplement — Angew Chem Int Ed Engl. 2021 Aug 12;60(45):24080–8. doi: 10.1002/anie.202108997 (PMC8596448; doi:10.1002/anie.202108997), 2021-08-12
Supplement: ANIE-60-24080-s001.pdf [file ANIE-60-24080-s001.pdf]

## Supporting Information

### **How Aromatic Are Molecular Nanorings? The Case of a Six-Porphyrin Nanoring\*\***

*Irene Casademont-Reig, Raúl Guerrero-Avilés, Eloy Ramos-Cordoba,\* Miquel Torrent-Sucarrat,\* and Eduard Matito\**

anie\_202108997\_sm\_miscellaneous\_information.pdf

## Supporting Information

### 1 Computational details

Following the computational work of Ref. 1, we have studied four different oxidation states of the six-porphyrin nanoring: neutral, +4, +6, and +12. The molecules have been studied considering not only the isolated belt structure (c-P6, c-P6<sup>4+</sup>, c-P6<sup>6+</sup>, and c-P6<sup>12+</sup>) but also taking into account the encapsulated template and the two phenyl substituents in each porphyrin (c-P6·T6, c-P6·T6<sup>4+</sup>, c-P6·T6<sup>6+</sup>, and c-P6·T6<sup>12+</sup>).

Geometry optimizations and frequency calculations have been performed with the Gaussian16 software package<sup>2</sup> using B3LYP,<sup>3-6</sup> CAM-B3LYP,<sup>7</sup> LC- $\omega$ HPBE ( $\omega=0.1$  and  $\omega=0.2$ ),<sup>8</sup> and M06-2X<sup>9</sup> density functional approximations (DFAs) including Grimme's D3 dispersion correction (for the first two DFAs)<sup>10</sup> and in combination with the 6-31G\* basis set.<sup>11</sup> The initial structures have been obtained from a previous work.<sup>1</sup> The geometry minima of all the oxidation states of c-P6 and the transition state of c-P6<sup>6+</sup> have been confirmed by analyzing the harmonic frequencies and the stability of the single-determinant wavefunction with respect to relaxing various constraints (spin and orbital symmetry, real orbitals) was confirmed. For c-P6<sup>4+</sup> and c-P6<sup>6+</sup>, single-point coupled-cluster calculations were performed with ORCA software package<sup>12</sup> using DLPNO-CCSD(T)<sup>13</sup> with resolution of identity<sup>14</sup> in combination with the Def-SVP/C basis set<sup>15</sup> and the corresponding auxiliary basis set in order to obtain accurate reference calculations to assess the accuracy of DFAs. Additional optimization and magnetic calculations have been performed with 6-31+G\* and 6-311+G\* basis sets. The results, which are collected in Tables S15 and S16, show that the conclusions drawn for these systems do not change with the basis set size.

The calculation of the electronic aromaticity indices (AV1245,<sup>16</sup> AV<sub>min</sub>,<sup>17</sup> BOA,<sup>18</sup> and FLU<sup>19,20</sup>) and the delocalization indices (DIs)<sup>21,22</sup> employs the quantum theory of atoms in molecules (QTAIM)<sup>23</sup> atomic partition performed by the AIMAll software.<sup>24</sup> The atomic overlap matrices resulting from this partition and the wavefunction files are the input of the in-house ESI-3D code,<sup>19,25,26</sup> which provides AV1245,<sup>16</sup> AV<sub>min</sub>,<sup>17</sup> BLA,<sup>18</sup> BOA,<sup>18</sup> DIs,<sup>22,26</sup> FLU,<sup>19,20</sup> the harmonic oscillator model of aromaticity (HOMA),<sup>27</sup> and MCI<sup>28</sup> values. The numerical integrations of the atoms in the QTAIM<sup>23</sup> as well as the corresponding oxidation states have errors below 0.004 and 0.03 electrons for c-P6 (in all its oxidation states) and c-P6·T6 (in all its oxidation states), respectively. The ESI-3D code is available upon request (ematito@gmail.com).<sup>19,25,26</sup> Anisotropy of the induced current density (ACID)<sup>29</sup> and nuclear-independent chemical shift (NICS)<sup>30-34</sup> calculations were conducted using the CSGT and GIAO methods, respectively, using Gaussian software packages (Gaussian09<sup>35</sup> and Gaussian16<sup>2</sup>). NICS grids were calculated with 1Å resolution (plots 20Å x 20Å grid) and the plots were generated with a Python script. The version 2.0.0 of the AICD program<sup>29</sup> was used to generate ACID results and they were visualized using POV-Ray.<sup>36</sup>

We also dissected AV1245 values and assigned a delocalization value to each atom in the corresponding pathway by splitting the MCI(1,2,4,5) of each five-atom fragment among the atoms in the fragment.<sup>16</sup> These profiles are called 1245-index distribution plots and help detect the fragments responsible for the loss of aromaticity.

The effective oxidation state (EOS) analysis<sup>37,38</sup> was performed with APOST-3D. The software provided in Ref. 39 was used to assess the similarity of two molecular geometries through the calculation of the root mean square deviation (RMSD) of the atomic distances.

NMR calculations were also performed using GIAO method in Gaussian16 software package<sup>2</sup> with B3LYP,<sup>3,4</sup> CAM-B3LYP,<sup>7</sup> and M06-2X<sup>9</sup> functionals including Grimme's D3 dispersion correction<sup>10</sup> and in combination with the 6-31G\* basis set.<sup>11</sup> Solvent effects of dichloromethane were taken into account using the Polarizable Continuum Model (PCM).<sup>40</sup>

<sup>a</sup> Donostia International Physics Center (DIPC), 20018 Donostia, Euskadi, Spain. E-mail: eloy.raco@gmail.com, miqueltorrentsucarrat@gmail.com; ematito@gmail.com

<sup>b</sup> Polímero eta Material Aurreratuak: Fisika, Kimika eta Teknologia, Kimika Fakultatea, Euskal Herriko Unibertsitatea UPV/EHU, P.K. 1072, 20080 Donostia, Euskadi, Spain.

<sup>c</sup> Centro de Física de Materiales, CFM-MPC CSIC-UPV/EHU, 20018 Donostia, Euskadi, Spain.

<sup>d</sup> Ikerbasque, Basque Foundation for Science, Plaza Euskadi 5, 48009 Bilbao, Euskadi, Spain.

<sup>e</sup> Department of Organic Chemistry I, Universidad del País Vasco/Euskal Herriko Unibertsitatea (UPV/EHU), 20018 Donostia, Euskadi, Spain.

† Dedication: We dedicate this paper to the memory of our friend and colleague, Professor Istvan Mayer, whose works have been a continuous inspiration.

## 2 Geometry assessment

In order to quantify the structural differences among the several optimized geometries, the root mean square deviation (RMSD) of two molecules has been calculated. The RMSD of two structures was calculated using the software provided in Ref. 39. This program calculates the RMSD between two Cartesian geometries in either .xyz or .pdb format and uses the Kabsch algorithm (1976)<sup>41</sup> or Quaternion algorithm<sup>42</sup> if rotation is needed before the calculation of RMSD. All the RMSD values included in this work compare two structures ignoring all the hydrogen atoms.

From the data in Table S1, we conclude that the structures found by Anderson *et al.* at the B3LYP/6-31G\* level of theory were not absolute minima of the corresponding potential energies for c-P6, c-P6<sup>4+</sup>, c-P6<sup>6+</sup>, and c-P6<sup>12+</sup>. However, their geometries are very similar to the ones we have found in this work at the same level of theory.

**Table S1** Energy comparison and the RMSD of the minimum geometries calculated by Anderson *et al.*<sup>1</sup> and this work at the B3LYP/6-31G\* level of theory. Energy units are atomic units (au) while RMSD are in Ångstroms (Å).

| Species             | Energy (Ref. 1) <sup>a</sup> | Energy (this work) | RMSD  |
|---------------------|------------------------------|--------------------|-------|
| c-P6                | -17512.513898                | -17512.514222      | 0.001 |
| c-P6 <sup>4+</sup>  | -17511.456927                | -17511.457194      | 0.040 |
| c-P6 <sup>6+</sup>  | -17510.640233                | -17510.640427      | 0.033 |
| c-P6 <sup>12+</sup> | -17507.033356                | -17507.033566      | 0.015 |

<sup>a</sup> Geometries from Ref. 1.

**Table S2** Comparison between the geometries calculated at the B3LYP, CAM-B3LYP, and M06-2X methods. The columns 2-4 give the total energy of the molecules at the corresponding geometry. The third last columns correspond to the RMSD values obtained from these geometries. All the calculations employed the 6-31G\* basis set. Energy units are atomic units (au) while RMSD are in Ångstroms (Å).

| Species             | G <sub>1</sub> (B3LYP) | G <sub>2</sub> (CAM-B3LYP) | G <sub>3</sub> (M06-2X) | RMSD(G <sub>1</sub> -G <sub>2</sub> ) | RMSD(G <sub>2</sub> -G <sub>3</sub> ) | RMSD (G <sub>1</sub> -G <sub>3</sub> ) |
|---------------------|------------------------|----------------------------|-------------------------|---------------------------------------|---------------------------------------|----------------------------------------|
| c-P6                | -17512.514222          | -17509.042830              | -17509.271928           | 0.049                                 | 0.021                                 | 0.041                                  |
| c-P6 <sup>4+</sup>  | -17511.457194          | -17507.935387              | -17508.138955           | 0.661                                 | 0.666                                 | 0.201                                  |
| c-P6 <sup>6+</sup>  | -17510.640427          | -17507.119479              | -17507.306773           | 0.224                                 | 0.031                                 | 0.206                                  |
| c-P6 <sup>12+</sup> | -17507.033566          | -17503.560977              | -17503.701580           | 0.040                                 | 0.031                                 | 0.036                                  |

The results of Table S2 demonstrate that the B3LYP energy minima found for c-P6 and c-P6<sup>12+</sup> structures are well reproduced by the CAM-B3LYP and M06-2X methods. However, the geometries of the B3LYP energy minima of c-P6<sup>4+</sup> and c-P6<sup>6+</sup> are significantly different from those found at the M06-2X and CAM-B3LYP levels of theory. Since the latter functional approximations do not suffer from large electron delocalization errors, one is prompted to conclude that B3LYP overestimates the symmetry of c-P6<sup>6+</sup> (and, hence, its aromaticity, see below), whereas it overestimates the asymmetry of c-P6<sup>4+</sup> (RMSD=0.661) resulting in a spurious enhancement of the antiaromatic features of this molecule (see below). Similar results have been recently reported by our group<sup>18,43-46</sup> and others.<sup>47-50</sup>

We have also characterized the structure of c-P6<sup>6+</sup> using the LC- $\omega$ HPBE<sup>8,51</sup> method with  $\omega=0.1$  and  $\omega=0.2$  in combination with the 6-31G\* basis set. Using LC- $\omega$ HPBE with  $\omega=0.1$ , the optimized structure lies in between the B3LYP and CAM-B3LYP ones, as confirmed by the fact that the RMSD values between the LC- $\omega$ HPBE( $\omega=0.1$ ) geometry and these two geometries are quite similar (0.160 and 0.142, for B3LYP and CAM-B3LYP, respectively). On the contrary, LC- $\omega$ HPBE with  $\omega=0.2$  provides a geometry closer to the CAM-B3LYP one (RMSD=0.095). This further demonstrates the importance of including a large percentage (typically above 50%) of HF exchange in the functional in order to correctly characterize conjugated molecules (avoiding the delocalization error<sup>52</sup>).

### 3 $^1\text{H-NMR}$ calculations

We have calculated the  $^1\text{H-NMR}$  spectra for all species, including the template structure and the phenyl substituents. The most important protons for the study of aromaticity are highlighted in the following figure.

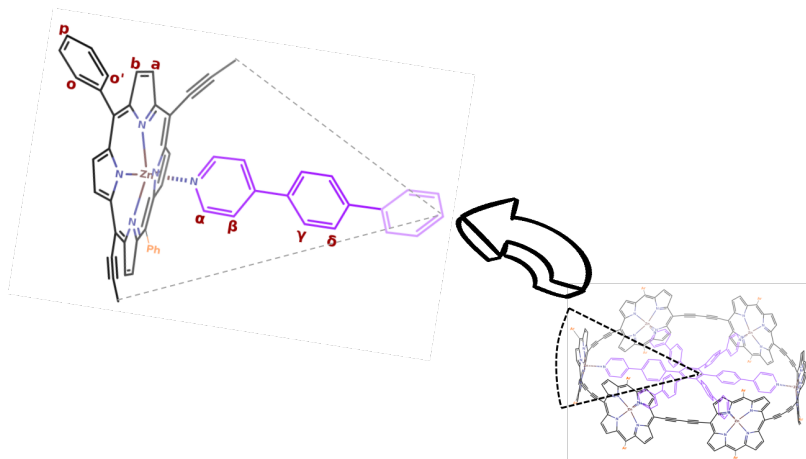

**Figure S1** Nanoring's structure where the most important protons of the  $^1\text{H-NMR}$  spectra are highlighted (see also Table S3).

In Table S3, we have summarized the shielding of the most relevant protons for the study of aromaticity and compared them with the experimental values from the literature.<sup>1</sup>

**Table S3**  $^1\text{H-NMR}$  values (in ppm) calculated using CAM-B3LYP, M06-2X, and B3LYP methods in combination with 6-31G\* basis set and using  $\text{CH}_2\text{Cl}_2$  as a solvent (PCM model).<sup>40</sup> We have compared with the experimental data from the literature.<sup>1</sup> Maximum error (MAX), root mean square error (RMSE), and mean absolute error (MAE) of each method are also given.

| Proton   | c-P6·T6   |        |       |              | c-P6·T6 <sup>4+</sup> |        |       |              | c-P6·T6 <sup>6+</sup> |        |       |              | c-P6·T6 <sup>12+</sup> |        |       |              |
|----------|-----------|--------|-------|--------------|-----------------------|--------|-------|--------------|-----------------------|--------|-------|--------------|------------------------|--------|-------|--------------|
|          | CAM-B3LYP | M06-2X | B3LYP | Experimental | CAM-B3LYP             | M06-2X | B3LYP | Experimental | CAM-B3LYP             | M06-2X | B3LYP | Experimental | CAM-B3LYP              | M06-2X | B3LYP | Experimental |
| $\alpha$ | 2.28      | 2.72   | 3.18  | 2.41         | 6.69                  | 9.02   | 68.95 | 22.7         | 7.65                  | 8.08   | -3.74 | 5.71         | 10.50                  | 11.32  | 14.15 | 11.31        |
| $\beta$  | 4.68      | 5.23   | 5.13  | 4.99         | 6.79                  | 8.81   | 56.20 | 19.9         | 6.87                  | 7.38   | -2.75 | 5.27         | 8.35                   | 9.10   | 9.78  | 8.83         |
| $\gamma$ | 5.32      | 5.74   | 5.65  | 5.45         | 6.90                  | 8.62   | 50.52 | -            | 6.85                  | 7.25   | -1.65 | 5.17         | 7.96                   | 8.55   | 8.93  | 7.94         |
| $\delta$ | 5.55      | 5.94   | 5.83  | 5.56         | 6.91                  | 8.49   | 49.97 | -            | 6.82                  | 7.18   | -1.03 | 5.17         | 7.84                   | 8.35   | 8.58  | 7.73         |
| a        | 9.74      | 10.39  | 9.38  | 9.56         | 8.29                  | 9.08   | 14.10 | -            | 7.44                  | 8.02   | 6.02  | 6.52         | 6.50                   | 6.97   | 4.31  | 6.05         |
| b        | 8.95      | 9.58   | 8.66  | 8.75         | 7.82                  | 8.60   | 17.05 | -            | 7.06                  | 7.57   | 4.94  | 5.99         | 6.04                   | 6.51   | 4.28  | 5.77         |
| o        | 8.13      | 8.84   | 7.92  | 8.06         | 7.71                  | 8.10   | -0.63 | -            | 7.69                  | 8.39   | 9.36  | 7.78         | 7.90                   | 8.56   | 8.49  | 7.31         |
| o'       | 8.21      | 8.85   | 8.23  | 8.32         | 8.12                  | 9.50   | 35.74 | -            | 7.51                  | 8.03   | 2.13  | 5.91         | 6.99                   | 7.55   | 5.82  | 6.57         |
| p        | 7.97      | 8.51   | 7.85  | 8.02         | 7.98                  | 8.74   | 14.66 | -            | 7.85                  | 8.41   | 6.51  | 7.92         | 7.98                   | 8.61   | 7.78  | 7.58         |
| MAX      | 0.31      | 0.83   | 0.77  | 0.00         | -                     | -      | -     | -            | 1.94                  | 2.37   | 9.45  | 0.00         | 0.81                   | 1.25   | 2.84  | 0.00         |
| MAE      | 0.13      | 0.52   | 0.23  | 0.00         | -                     | -      | -     | -            | 1.18                  | 1.65   | 4.31  | 0.00         | 0.39                   | 0.71   | 1.22  | 0.00         |
| RMSE     | 0.16      | 0.57   | 0.30  | 0.00         | -                     | -      | -     | -            | 1.35                  | 1.77   | 5.36  | 0.00         | 0.45                   | 0.80   | 1.41  | 0.00         |

All the errors presented in Table S3 (MAX, MAE, and RMSE) clearly indicate that the functional that better reproduces the experimental data is CAM-B3LYP. While errors are of similar magnitude for c-P6·T6, they are much larger for c-P6·T6<sup>6+</sup>, indicating that B3LYP geometry is quite different from the experimental one.

To assess to which extent we can rely on the  $^1\text{H-NMR}$  data to analyze the aromaticity of these systems, we have constructed a structure that has no current, therefore, is not aromatic. To construct it, we have taken the optimized structure of each species and replaced all the bridging butadiyne linkers by capping hydrogen atoms. Then, we made a single-point calculation to obtain the chemical shieldings of the disconnected structure (see Figure S2). In the following table, the chemical shielding of the protons that are used to analyze of the aromatic character are presented for both disconnected and connected structures of the nanoring's species. In addition, the  $^1\text{H-NMR}$  chemical shift of  $\alpha$  and  $\beta$  protons of the free template are presented in Table S5.

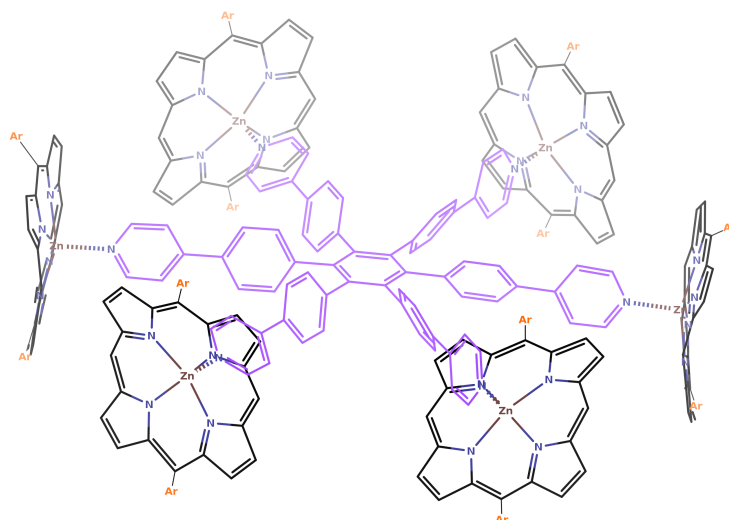

**Figure S2** Nanoring's disconnected structure where the bridging butadiyne linkers have been removed.

**Table S4** Selected  $^1\text{H-NMR}$  chemical shift (in ppm) calculated using CAM-B3LYP and B3LYP methods in combination with 6-31G\* basis set and using  $\text{CH}_2\text{Cl}_2$  as a solvent (PCM model).<sup>40</sup> Experimental data is taken from Ref. 1 and Ref. 53. For each species we include the values of the nanoring's structure (connected) and an idealized model, where the bridging butadiyne linkers have been removed (disconnected) (See Figure S2)

| Method       | data     | c-P6 · T6 |              | c-P6 · T6 <sup>4+</sup> |              | c-P6 · T6 <sup>6+</sup> |              | c-P6 · T6 <sup>12+</sup> |              |
|--------------|----------|-----------|--------------|-------------------------|--------------|-------------------------|--------------|--------------------------|--------------|
|              |          | Connected | Disconnected | Connected               | Disconnected | Connected               | Disconnected | Connected                | Disconnected |
| CAM-B3LYP    | $\alpha$ | 2.28      | 1.93         | 6.69                    | 9.95         | 7.65                    | 13.62        | 10.50                    | 10.60        |
|              | $\beta$  | 4.68      | 4.47         | 6.79                    | 7.77         | 6.87                    | 9.32         | 8.35                     | 8.35         |
|              | o        | 8.13      | 8.17         | 7.71                    | 7.38         | 7.69                    | 7.36         | 7.90                     | 7.93         |
|              | o'       | 8.21      | 8.24         | 8.12                    | 6.88         | 7.51                    | 6.21         | 6.99                     | 6.98         |
| B3LYP        | $\alpha$ | 3.18      | 2.09         | 68.95                   | 9.03         | -3.74                   | 15.34        | 14.15                    | 14.42        |
|              | $\beta$  | 5.13      | 4.46         | 56.20                   | 6.66         | -2.75                   | 9.89         | 9.78                     | 9.84         |
|              | o        | 7.92      | 8.02         | -0.63                   | 7.48         | 9.36                    | 7.07         | 8.49                     | 8.52         |
|              | o'       | 8.23      | 8.12         | 35.74                   | 6.05         | 2.13                    | 5.68         | 5.82                     | 5.82         |
| Experimental | $\alpha$ | 2.41      | -            | 22.7                    | -            | 5.71                    | -            | 11.31                    | -            |
|              | $\beta$  | 4.99      | -            | 19.9                    | -            | 5.27                    | -            | 8.83                     | -            |
|              | o        | 8.06      | -            | -                       | -            | 7.78                    | -            | 7.31                     | -            |
|              | o'       | 8.32      | -            | -                       | -            | 5.91                    | -            | 6.57                     | -            |

**Table S5**  $^1\text{H-NMR}$  chemical shift of  $\alpha$  and  $\beta$  protons of the free template (in ppm) calculated using CAM-B3LYP and B3LYP methods in combination with 6-31G\* basis set and using  $\text{CH}_2\text{Cl}_2$  as a solvent (PCM model).<sup>40</sup> Experimental data is taken from Ref. 1.

| data     | CAM-B3LYP | B3LYP | Experimental |
|----------|-----------|-------|--------------|
| $\alpha$ | 8.62      | 8.52  | 8.54         |
| $\beta$  | 7.22      | 7.10  | 7.33         |

Comparing the  $^1\text{H-NMR}$  data of all the species' connected and disconnected structures, we can appreciate that the values are pretty similar. Even in some cases, the disconnected structure presents a slightly higher value. Therefore, these results show that, although the porphyrins are not connected, a ring current is present. For this reason, we can say that this is another piece of evidence that proves that none of the species studied is aromatic.

## 4 Aromaticity

### 4.1 Porphyrinoid reference systems

In order to assess the aromaticity of the molecules presented in the manuscript, we have collected in Table S6 the aromaticity indices for the different pathways of a simple aromatic porphyrin molecule, porphin (**18H**). All the values presented in this section regarding **18H** were calculated at the CAM-B3LYP/6-311G(d,p) level of theory.<sup>43</sup> A molecular graph of porphin, with delocalization indices values included, can be found in Figure S3. If the pathway goes either through C-N bonds of the pyrrole or the imine groups, this fragment is labeled as "i" (inner), otherwise "o" (outer) is used. As a result, all the pathways are characterized by four letters, the first of which corresponds to pyrrole group at the top-left corner of Figure S3. The "oioi" pathway corresponds to the annulene pathway.

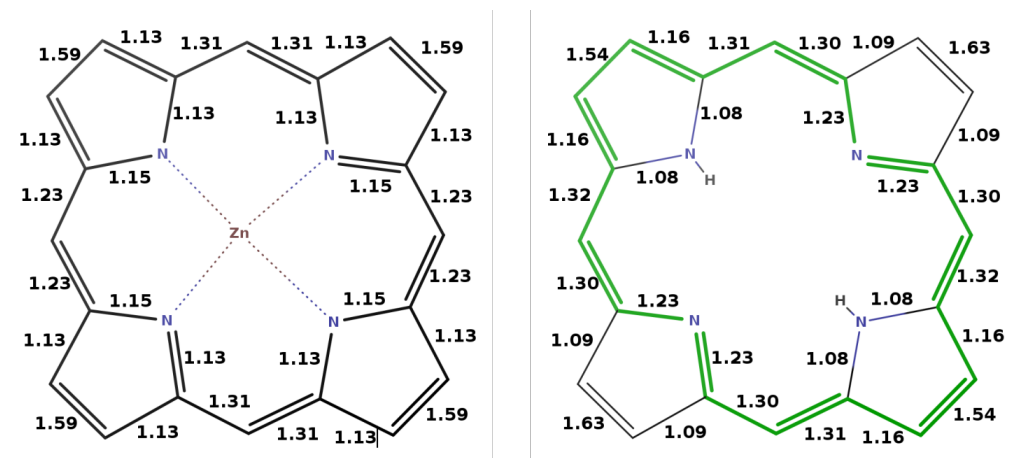

**Figure S3** Delocalization indices of (left) c-P6 porphyrins and (right) porphin. In green, we have highlighted the annulene pathway (the most aromatic one) of **18H**.<sup>43</sup> Calculations employed the CAM-B3LYP functional in combination with 6-31G\* and 6-311G\*\* basis set, respectively.

**Table S6** Aromaticity indices for the different pathways of porphin (**18H**). Geometries and some results extracted from Ref. 43. The number in parentheses indicates the number of pathways that are equivalent by symmetry.

| pathway   | FLU   | BOA <sup>a</sup> | HOMA  | BLA <sup>a</sup> | AV1245 | AVmin |
|-----------|-------|------------------|-------|------------------|--------|-------|
| oioi      | 0.010 | 0.137            | 0.872 | 0.035            | 2.16   | 1.28  |
| oooi (2)  | 0.016 | 0.202            | 0.734 | 0.047            | 1.91   | 0.49  |
| oooo      | 0.022 | 0.260            | 0.610 | 0.058            | 1.70   | 0.49  |
| ii oi (2) | 0.008 | 0.111            | 0.917 | 0.026            | 1.57   | 0.13  |
| ooii (4)  | 0.015 | 0.180            | 0.769 | 0.040            | 1.36   | 0.13  |
| ooio (2)  | 0.021 | 0.243            | 0.637 | 0.052            | 1.17   | 0.13  |
| iiii      | 0.006 | 0.081            | 0.968 | 0.016            | 0.91   | 0.13  |
| iiio (2)  | 0.013 | 0.157            | 0.808 | 0.031            | 0.73   | 0.13  |
| ioio      | 0.019 | 0.224            | 0.666 | 0.045            | 0.57   | 0.13  |

<sup>a</sup> BOA and BLA were recalculated according to the formulation of Ref. 44.

In order to compare 1245-index distribution graphs of the nanoring structure with different oxidation states, we have included the 1245-index distribution plots of the  $26\pi$ -electron porphyrin in Hückel conformation (**26H**) and the  $32\pi$ -electron porphyrin in Möbius conformation (**32M**) as examples of aromatic expanded porphyrins (see Figure S4). For a detailed analysis of the aromaticity of **26H** and **32M** see Ref 43.

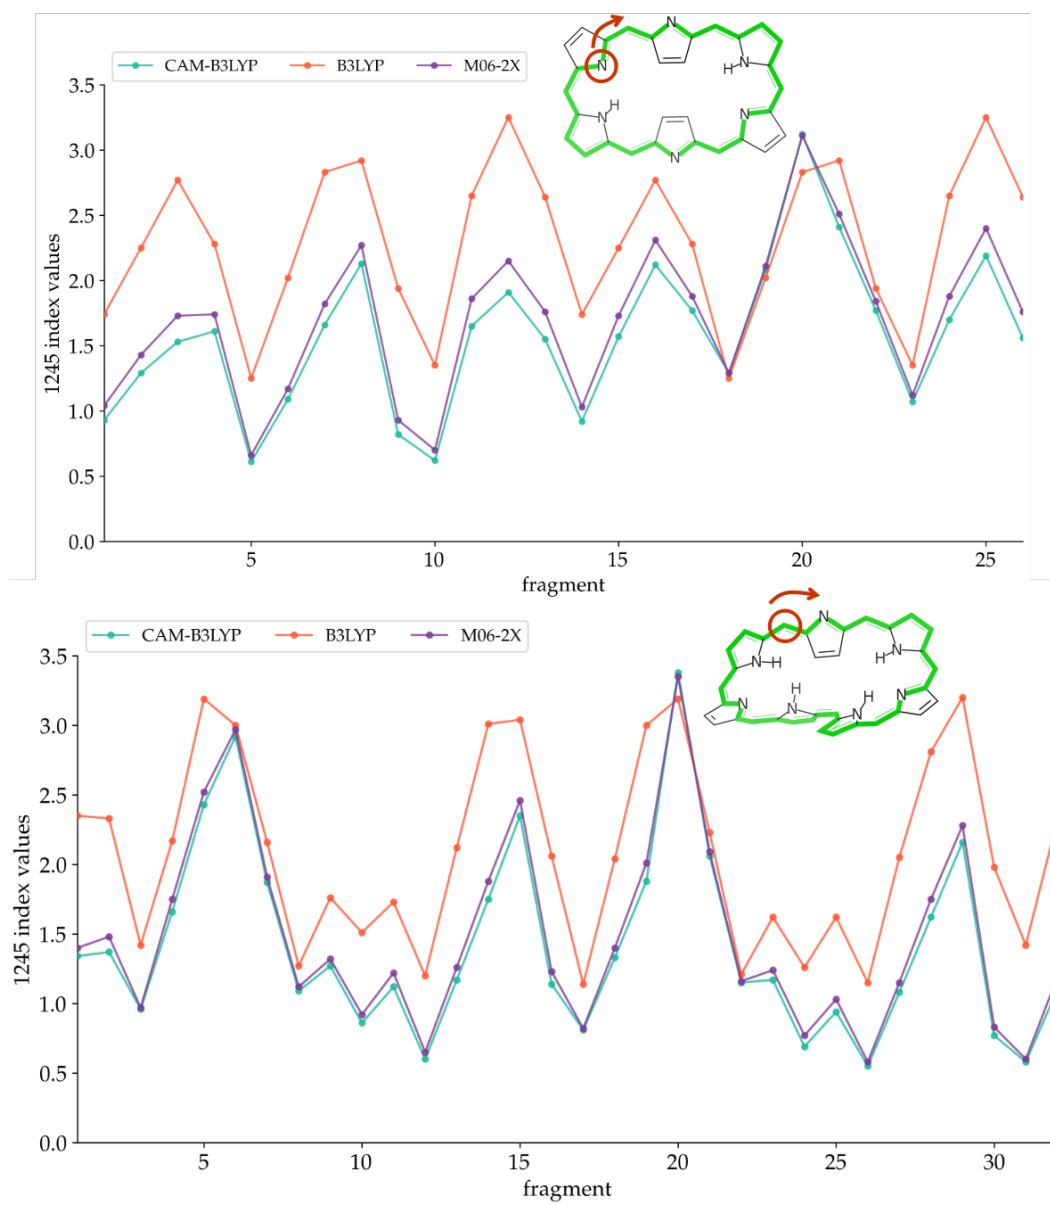

**Figure S4** 1245-index distribution along the most aromatic path, the annulene path, of (top) **26H** and (bottom) **32M** for the three DFAs exposed in combination with the 6-311G(d,p) basis set.<sup>54</sup> We have highlighted the first atom of the starting fragment of the 1245-index distribution with an orange circle and used an arrow to indicate the direction of the x-axis.





**Table S9** Aromaticity indices values of the three asymmetric porphyrins of c-P6<sup>4+</sup>. We can group the six porphyrins of the structure into three groups of two porphyrins each, according to symmetry. The members of the same group exhibit very similar aromaticity values. Labels P<sub>1</sub>, P<sub>2</sub>, and P<sub>3</sub> match with the representation exposed in Figure 6 of the manuscript. These porphyrins host inside Zn<sub>33</sub>, Zn<sub>48</sub>, and Zn<sub>96</sub>, respectively, where the numeration of the Zn atoms follows the numeration of the Cartesian coordinates given in a separate file of this Supporting Information.

|                | pathway  | B3LYP |       |       |       |        | CAM-B3LYP         |       |       |       |       | M06-2X |                   |       |       |       |       |        |                   |
|----------------|----------|-------|-------|-------|-------|--------|-------------------|-------|-------|-------|-------|--------|-------------------|-------|-------|-------|-------|--------|-------------------|
|                |          | FLU   | BOA   | HOMA  | BLA   | AV1245 | AV <sub>min</sub> | FLU   | BOA   | HOMA  | BLA   | AV1245 | AV <sub>min</sub> | FLU   | BOA   | HOMA  | BLA   | AV1245 | AV <sub>min</sub> |
| P <sub>1</sub> | oooo     | 0.024 | 0.206 | 0.598 | 0.043 | 1.36   | 0.63              | 0.025 | 0.206 | 0.642 | 0.041 | 1.35   | 0.32              | 0.027 | 0.231 | 0.583 | 0.048 | 1.35   | 0.44              |
|                | iiii     | 0.011 | 0.075 | 0.823 | 0.026 | 1.24   | 0.29              | 0.016 | 0.112 | 0.784 | 0.039 | 1.29   | 0.09              | 0.013 | 0.099 | 0.845 | 0.034 | 1.17   | 0.13              |
|                | ioio (2) | 0.018 | 0.148 | 0.698 | 0.036 | 1.31   | 0.29              | 0.021 | 0.164 | 0.705 | 0.040 | 1.33   | 0.09              | 0.021 | 0.173 | 0.699 | 0.042 | 1.27   | 0.13              |
|                | iiio (4) | 0.014 | 0.116 | 0.761 | 0.031 | 1.25   | 0.29              | 0.018 | 0.141 | 0.754 | 0.039 | 1.25   | 0.09              | 0.016 | 0.140 | 0.781 | 0.037 | 1.20   | 0.13              |
|                | iiio (2) | 0.018 | 0.148 | 0.698 | 0.036 | 1.31   | 0.29              | 0.021 | 0.164 | 0.705 | 0.040 | 1.33   | 0.09              | 0.021 | 0.173 | 0.699 | 0.042 | 1.27   | 0.13              |
|                | iooi (2) | 0.018 | 0.143 | 0.691 | 0.036 | 1.36   | 0.64              | 0.022 | 0.160 | 0.683 | 0.041 | 1.45   | 0.32              | 0.021 | 0.170 | 0.673 | 0.043 | 1.32   | 0.44              |
|                | oooi (4) | 0.021 | 0.176 | 0.642 | 0.040 | 1.36   | 0.63              | 0.023 | 0.184 | 0.662 | 0.041 | 1.40   | 0.32              | 0.024 | 0.202 | 0.626 | 0.046 | 1.34   | 0.44              |
|                | oooo     | 0.026 | 0.203 | 0.546 | 0.044 | 1.34   | 0.55              | 0.028 | 0.209 | 0.594 | 0.043 | 1.34   | 0.26              | 0.030 | 0.222 | 0.518 | 0.045 | 1.30   | 0.30              |
|                | iiii     | 0.012 | 0.060 | 0.801 | 0.032 | 1.14   | 0.27              | 0.018 | 0.108 | 0.759 | 0.044 | 1.18   | 0.08              | 0.017 | 0.107 | 0.757 | 0.044 | 1.12   | 0.08              |
|                | ioio (2) | 0.020 | 0.139 | 0.661 | 0.038 | 1.26   | 0.28              | 0.023 | 0.164 | 0.669 | 0.043 | 1.28   | 0.09              | 0.024 | 0.171 | 0.626 | 0.045 | 1.23   | 0.09              |
|                | iiio (4) | 0.016 | 0.098 | 0.724 | 0.035 | 1.23   | 0.28              | 0.021 | 0.134 | 0.701 | 0.044 | 1.29   | 0.09              | 0.021 | 0.139 | 0.675 | 0.045 | 1.22   | 0.09              |
|                | iiio (2) | 0.020 | 0.140 | 0.659 | 0.039 | 1.25   | 0.28              | 0.023 | 0.164 | 0.667 | 0.043 | 1.26   | 0.09              | 0.024 | 0.171 | 0.624 | 0.045 | 1.22   | 0.09              |
|                | iooi (2) | 0.020 | 0.148 | 0.665 | 0.038 | 1.20   | 0.27              | 0.022 | 0.171 | 0.686 | 0.042 | 1.16   | 0.08              | 0.023 | 0.176 | 0.649 | 0.043 | 1.15   | 0.08              |
|                | oooi (4) | 0.023 | 0.177 | 0.601 | 0.041 | 1.27   | 0.27              | 0.025 | 0.191 | 0.637 | 0.042 | 1.25   | 0.08              | 0.027 | 0.200 | 0.579 | 0.044 | 1.23   | 0.08              |
| P <sub>2</sub> | oooo     | 0.023 | 0.187 | 0.607 | 0.037 | 1.35   | 0.56              | 0.025 | 0.206 | 0.642 | 0.041 | 1.35   | 0.32              | 0.025 | 0.190 | 0.620 | 0.036 | 1.36   | 0.42              |
|                | iiii     | 0.012 | 0.072 | 0.789 | 0.027 | 1.37   | 0.49              | 0.016 | 0.112 | 0.784 | 0.039 | 1.29   | 0.09              | 0.016 | 0.083 | 0.789 | 0.034 | 1.39   | 0.41              |
|                | ioio (2) | 0.018 | 0.135 | 0.688 | 0.033 | 1.36   | 0.49              | 0.021 | 0.164 | 0.705 | 0.040 | 1.33   | 0.09              | 0.021 | 0.143 | 0.695 | 0.035 | 1.38   | 0.41              |
|                | iiio (4) | 0.016 | 0.105 | 0.735 | 0.030 | 1.36   | 0.49              | 0.019 | 0.137 | 0.731 | 0.040 | 1.38   | 0.09              | 0.019 | 0.115 | 0.739 | 0.035 | 1.38   | 0.41              |
|                | iiio (2) | 0.018 | 0.135 | 0.688 | 0.033 | 1.36   | 0.49              | 0.021 | 0.164 | 0.705 | 0.040 | 1.33   | 0.09              | 0.021 | 0.143 | 0.695 | 0.035 | 1.38   | 0.41              |
|                | iooi (2) | 0.018 | 0.135 | 0.688 | 0.033 | 1.36   | 0.49              | 0.020 | 0.168 | 0.727 | 0.040 | 1.20   | 0.09              | 0.021 | 0.143 | 0.695 | 0.035 | 1.38   | 0.41              |
|                | oooi (4) | 0.021 | 0.162 | 0.645 | 0.035 | 1.36   | 0.49              | 0.023 | 0.188 | 0.682 | 0.188 | 1.28   | 0.09              | 0.023 | 0.168 | 0.656 | 0.036 | 1.37   | 0.41              |
|                | oooo     | 0.026 | 0.203 | 0.548 | 0.044 | 1.33   | 0.51              | 0.026 | 0.229 | 0.601 | 0.050 | 1.38   | 0.39              | 0.029 | 0.233 | 0.535 | 0.050 | 1.33   | 0.38              |
|                | iiii     | 0.012 | 0.060 | 0.803 | 0.031 | 1.13   | 0.24              | 0.010 | 0.051 | 0.911 | 0.027 | 1.00   | 0.37              | 0.013 | 0.073 | 0.853 | 0.035 | 1.02   | 0.17              |
|                | ioio (2) | 0.020 | 0.141 | 0.656 | 0.039 | 1.21   | 0.24              | 0.019 | 0.152 | 0.733 | 0.040 | 1.17   | 0.37              | 0.022 | 0.164 | 0.670 | 0.044 | 1.15   | 0.17              |
|                | iiio (4) | 0.016 | 0.108 | 0.728 | 0.035 | 1.14   | 0.24              | 0.015 | 0.105 | 0.818 | 0.034 | 1.09   | 0.37              | 0.017 | 0.123 | 0.766 | 0.039 | 1.08   | 0.17              |
|                | iiio (2) | 0.020 | 0.140 | 0.662 | 0.038 | 1.24   | 0.28              | 0.019 | 0.150 | 0.738 | 0.040 | 1.21   | 0.39              | 0.022 | 0.163 | 0.676 | 0.043 | 1.18   | 0.22              |
|                | iooi (2) | 0.020 | 0.131 | 0.656 | 0.038 | 1.29   | 0.59              | 0.019 | 0.150 | 0.735 | 0.040 | 1.20   | 0.44              | 0.022 | 0.159 | 0.657 | 0.045 | 1.19   | 0.46              |
|                | oooi (2) | 0.023 | 0.168 | 0.602 | 0.041 | 1.33   | 0.52              | 0.023 | 0.190 | 0.668 | 0.045 | 1.32   | 0.41              | 0.025 | 0.197 | 0.596 | 0.047 | 1.29   | 0.40              |
| P <sub>3</sub> | oooo     | 0.024 | 0.206 | 0.598 | 0.043 | 1.36   | 0.63              | 0.024 | 0.231 | 0.643 | 0.049 | 1.44   | 0.48              | 0.027 | 0.231 | 0.583 | 0.048 | 1.35   | 0.44              |
|                | iiii     | 0.011 | 0.075 | 0.823 | 0.026 | 1.24   | 0.29              | 0.008 | 0.068 | 0.917 | 0.021 | 1.07   | 0.50              | 0.013 | 0.099 | 0.845 | 0.034 | 1.17   | 0.13              |
|                | ioio (2) | 0.018 | 0.148 | 0.698 | 0.036 | 1.31   | 0.29              | 0.017 | 0.159 | 0.765 | 0.037 | 1.27   | 0.50              | 0.021 | 0.173 | 0.699 | 0.042 | 1.27   | 0.13              |
|                | iiio (4) | 0.015 | 0.111 | 0.753 | 0.031 | 1.31   | 0.29              | 0.013 | 0.116 | 0.837 | 0.029 | 1.18   | 0.50              | 0.017 | 0.137 | 0.754 | 0.039 | 1.25   | 0.13              |
|                | iiio (2) | 0.018 | 0.148 | 0.698 | 0.036 | 1.31   | 0.29              | 0.017 | 0.159 | 0.765 | 0.037 | 1.28   | 0.48              | 0.021 | 0.173 | 0.699 | 0.042 | 1.27   | 0.13              |
|                | iooi (2) | 0.018 | 0.153 | 0.706 | 0.036 | 1.25   | 0.29              | 0.017 | 0.159 | 0.765 | 0.037 | 1.27   | 0.50              | 0.020 | 0.176 | 0.725 | 0.040 | 1.22   | 0.13              |
|                | oooi (4) | 0.021 | 0.181 | 0.649 | 0.040 | 1.31   | 0.29              | 0.021 | 0.197 | 0.701 | 0.043 | 1.36   | 0.48              | 0.023 | 0.205 | 0.650 | 0.044 | 1.29   | 0.13              |
|                | oooo     | 0.025 | 0.184 | 0.568 | 0.038 | 1.32   | 0.56              | 0.027 | 0.205 | 0.608 | 0.042 | 1.33   | 0.28              | 0.028 | 0.195 | 0.574 | 0.039 | 1.31   | 0.33              |
|                | iiii     | 0.014 | 0.060 | 0.774 | 0.033 | 1.24   | 0.47              | 0.017 | 0.102 | 0.771 | 0.042 | 1.19   | 0.10              | 0.018 | 0.080 | 0.761 | 0.041 | 1.23   | 0.24              |
|                | ioio (2) | 0.021 | 0.128 | 0.652 | 0.036 | 1.25   | 0.47              | 0.023 | 0.161 | 0.671 | 0.042 | 1.23   | 0.10              | 0.024 | 0.141 | 0.645 | 0.041 | 1.25   | 0.24              |
|                | iiio (4) | 0.017 | 0.096 | 0.710 | 0.035 | 1.25   | 0.47              | 0.020 | 0.138 | 0.730 | 0.042 | 1.15   | 0.10              | 0.021 | 0.114 | 0.706 | 0.040 | 1.20   | 0.24              |
|                | iiio (2) | 0.020 | 0.129 | 0.659 | 0.036 | 1.29   | 0.47              | 0.023 | 0.161 | 0.684 | 0.042 | 1.26   | 0.10              | 0.023 | 0.142 | 0.661 | 0.039 | 1.27   | 0.24              |
|                | iooi (2) | 0.020 | 0.129 | 0.659 | 0.036 | 1.29   | 0.47              | 0.023 | 0.153 | 0.662 | 0.044 | 1.39   | 0.28              | 0.024 | 0.138 | 0.649 | 0.041 | 1.34   | 0.33              |
|                | oooi (4) | 0.023 | 0.158 | 0.614 | 0.037 | 1.33   | 0.51              | 0.025 | 0.179 | 0.635 | 0.042 | 1.39   | 0.28              | 0.026 | 0.169 | 0.613 | 0.040 | 1.34   | 0.33              |

### 4.3 Global Aromaticity indices values

In this section, we have gathered different tables with aromaticity indices and images related to the global aromaticity of the nanoring structure. In Tables S10 and S11, the MCI values of the linkers bridging the porphyrins are analyzed, while in Tables S12 and S13, the aromatic pathways consisting of large conjugated chains along the whole belt structure of the nanoring are given. Afterward, we present the 1245-index distribution plots, ACID plots, and NICS values.

**Table S10** MCI ( $\times 1000$ ) values for the six carbon atoms that form the linker bridging two porphyrins for c-P6, c-P6<sup>4+</sup>, c-P6<sup>6+</sup>, and c-P6<sup>12+</sup> calculated at the B3LYP, CAM-B3LYP, and M06-2X/6-31G\* levels of theory.

| Species/Linker      | B3LYP          |                |                |                |                |                | CAM-B3LYP      |                |                |                |                |                | M06-2X         |                |                |                |                |                |
|---------------------|----------------|----------------|----------------|----------------|----------------|----------------|----------------|----------------|----------------|----------------|----------------|----------------|----------------|----------------|----------------|----------------|----------------|----------------|
|                     | L <sub>1</sub> | L <sub>2</sub> | L <sub>3</sub> | L <sub>4</sub> | L <sub>5</sub> | L <sub>6</sub> | L <sub>1</sub> | L <sub>2</sub> | L <sub>3</sub> | L <sub>4</sub> | L <sub>5</sub> | L <sub>6</sub> | L <sub>1</sub> | L <sub>2</sub> | L <sub>3</sub> | L <sub>4</sub> | L <sub>5</sub> | L <sub>6</sub> |
| c-P6                | 2              | 2              | 2              | 2              | 2              | 2              | 1              | 1              | 1              | 1              | 1              | 1              | 1              | 1              | 1              | 1              | 1              | 1              |
| c-P6 <sup>4+</sup>  | 7              | 7              | 2              | 7              | 7              | 2              | 20             | 4              | 4              | 20             | 4              | 4              | 14             | 14             | 2              | 14             | 14             | 2              |
| c-P6 <sup>6+</sup>  | 6              | 6              | 6              | 6              | 6              | 6              | 1              | 21             | 1              | 21             | 1              | 21             | 2              | 21             | 2              | 21             | 2              | 21             |
| c-P6 <sup>12+</sup> | 2              | 2              | 2              | 2              | 2              | 2              | 1              | 1              | 1              | 1              | 1              | 1              | 1              | 1              | 1              | 1              | 1              | 1              |

**Table S11** MCI ( $\times 1000$ ) values for the six carbon atoms that form the linker bridging two porphyrins for c-P6·T6, c-P6·T6<sup>4+</sup>, c-P6·T6<sup>6+</sup>, and c-P6·T6<sup>12+</sup> calculated at the B3LYP, CAM-B3LYP, and M06-2X/6-31G\* levels of theory.

| Species/Linker         | B3LYP          |                |                |                |                |                | CAM-B3LYP      |                |                |                |                |                | M06-2X         |                |                |                |                |                |
|------------------------|----------------|----------------|----------------|----------------|----------------|----------------|----------------|----------------|----------------|----------------|----------------|----------------|----------------|----------------|----------------|----------------|----------------|----------------|
|                        | L <sub>1</sub> | L <sub>2</sub> | L <sub>3</sub> | L <sub>4</sub> | L <sub>5</sub> | L <sub>6</sub> | L <sub>1</sub> | L <sub>2</sub> | L <sub>3</sub> | L <sub>4</sub> | L <sub>5</sub> | L <sub>6</sub> | L <sub>1</sub> | L <sub>2</sub> | L <sub>3</sub> | L <sub>4</sub> | L <sub>5</sub> | L <sub>6</sub> |
| c-P6·T6                | 3              | 3              | 3              | 3              | 3              | 3              | 1              | 1              | 1              | 1              | 1              | 2              | 2              | 2              | 2              | 2              | 2              | 2              |
| c-P6·T6 <sup>4+</sup>  | 3              | 11             | 11             | 4              | 11             | 12             | 4              | 5              | 4              | 21             | 4              | 21             | 2              | 10             | 18             | 2              | 9              | 19             |
| c-P6·T6 <sup>6+</sup>  | 5              | 14             | 5              | 14             | 5              | 14             | 1              | 22             | 1              | 22             | 1              | 22             | 1              | 22             | 1              | 22             | 1              | 22             |
| c-P6·T6 <sup>12+</sup> | 3              | 3              | 3              | 3              | 3              | 3              | 1              | 1              | 1              | 1              | 1              | 1              | 1              | 1              | 1              | 1              | 1              | 1              |

**Table S12** Aromaticity indices for several pathways of c-P6, c-P6<sup>4+</sup>, c-P6<sup>6+</sup>, and c-P6<sup>12+</sup> calculated at the B3LYP, CAM-B3LYP, and M06-2X/6-31G\* levels of theory.

| pathway             | B3LYP             |       |       |        |        |                   | CAM-B3LYP |       |       |        |        |                   | M06-2X |       |       |        |        |                   |      |
|---------------------|-------------------|-------|-------|--------|--------|-------------------|-----------|-------|-------|--------|--------|-------------------|--------|-------|-------|--------|--------|-------------------|------|
|                     | FLU               | BOA   | HOMA  | BLA    | AV1245 | AV <sub>min</sub> | FLU       | BOA   | HOMA  | BLA    | AV1245 | AV <sub>min</sub> | FLU    | BOA   | HOMA  | BLA    | AV1245 | AV <sub>min</sub> |      |
| c-P6                | ii ii ii ii ii ii | 0.082 | 0.375 | -0.116 | 0.061  | 1.23              | 0.57      | 0.097 | 0.431 | -0.182 | 0.068  | 0.99              | 0.50   | 0.097 | 0.427 | -0.172 | 0.069  | 1.01              | 0.52 |
|                     | oo oo oo oo oo oo | 0.082 | 0.435 | -0.190 | 0.073  | 1.48              | 0.19      | 0.096 | 0.493 | -0.272 | 0.083  | 1.25              | 0.03   | 0.096 | 0.491 | -0.286 | 0.082  | 1.26              | 0.04 |
|                     | oo ii oo ii oo ii | 0.082 | 0.407 | -0.161 | 0.067  | 1.37              | 0.19      | 0.097 | 0.464 | -0.235 | 0.076  | 1.13              | 0.03   | 0.096 | 0.461 | -0.240 | 0.076  | 1.14              | 0.04 |
|                     | oo oo ii oo oo ii | 0.082 | 0.417 | -0.172 | 0.069  | 1.41              | 0.19      | 0.096 | 0.474 | -0.249 | 0.078  | 1.17              | 0.03   | 0.096 | 0.427 | -0.257 | 0.078  | 1.18              | 0.04 |
|                     | oo oo oo ii oo oo | 0.082 | 0.426 | -0.182 | 0.071  | 1.45              | 0.19      | 0.096 | 0.484 | -0.261 | 0.081  | 1.21              | 0.03   | 0.096 | 0.482 | -0.273 | 0.080  | 1.22              | 0.04 |
|                     | oi oi oi oi oi oi | 0.082 | 0.407 | -0.161 | 0.067  | 1.37              | 0.19      | 0.097 | 0.464 | -0.235 | 0.076  | 1.13              | 0.03   | 0.096 | 0.461 | -0.240 | 0.076  | 1.14              | 0.04 |
|                     | oi io oi io oi io | 0.082 | 0.407 | -0.161 | 0.067  | 1.37              | 0.19      | 0.097 | 0.464 | -0.235 | 0.076  | 1.13              | 0.03   | 0.096 | 0.461 | -0.240 | 0.076  | 1.14              | 0.04 |
|                     | oi ii io ii io ii | 0.082 | 0.387 | -0.133 | 0.063  | 1.28              | 0.19      | 0.097 | 0.443 | -0.202 | 0.071  | 1.04              | 0.03   | 0.097 | 0.439 | -0.197 | 0.072  | 1.06              | 0.04 |
| c-P6 <sup>4+</sup>  | ii ii ii ii ii ii | 0.067 | 0.337 | -0.033 | 0.062  | 1.87              | 0.83      | 0.073 | 0.361 | -0.047 | 0.067  | 1.70              | 0.81   | 0.072 | 0.367 | -0.035 | 0.069  | 1.79              | 0.68 |
|                     | oo oo oo oo oo oo | 0.067 | 0.386 | -0.111 | 0.067  | 1.55              | 0.08      | 0.072 | 0.404 | -0.121 | 0.070  | 1.51              | 0.07   | 0.073 | 0.413 | -0.140 | 0.071  | 1.53              | 0.01 |
|                     | oo ii oo ii oo ii | 0.067 | 0.364 | -0.081 | 0.065  | 1.70              | 0.08      | 0.072 | 0.384 | -0.091 | 0.069  | 1.60              | 0.07   | 0.073 | 0.392 | -0.098 | 0.070  | 1.65              | 0.01 |
|                     | oo oo ii oo oo ii | 0.067 | 0.370 | -0.089 | 0.065  | 1.65              | 0.08      | 0.072 | 0.382 | -0.083 | 0.066  | 1.58              | 0.12   | 0.072 | 0.397 | -0.107 | 0.070  | 1.61              | 0.01 |
|                     | oo oo oo ii oo oo | 0.067 | 0.378 | -0.101 | 0.066  | 1.60              | 0.08      | 0.073 | 0.400 | -0.117 | 0.070  | 1.54              | 0.07   | 0.073 | 0.405 | -0.124 | 0.070  | 1.57              | 0.01 |
|                     | oi oi oi oi oi oi | 0.067 | 0.364 | -0.081 | 0.065  | 1.70              | 0.08      | 0.072 | 0.384 | -0.091 | 0.069  | 1.60              | 0.07   | 0.073 | 0.392 | -0.098 | 0.070  | 1.65              | 0.01 |
|                     | oi io oi io oi io | 0.067 | 0.364 | -0.081 | 0.065  | 1.70              | 0.08      | 0.072 | 0.384 | -0.091 | 0.069  | 1.60              | 0.07   | 0.073 | 0.392 | -0.098 | 0.070  | 1.65              | 0.01 |
|                     | oi ii io ii io ii | 0.067 | 0.347 | -0.053 | 0.063  | 1.81              | 0.08      | 0.072 | 0.367 | -0.058 | 0.067  | 1.67              | 0.12   | 0.073 | 0.377 | -0.063 | 0.070  | 1.74              | 0.01 |
| c-P6 <sup>6+</sup>  | ii ii ii ii ii ii | 0.063 | 0.326 | -0.017 | 0.062  | 2.03              | 0.94      | 0.073 | 0.379 | -0.102 | 0.075  | 1.54              | 0.69   | 0.073 | 0.376 | -0.092 | 0.075  | 1.61              | 0.74 |
|                     | oo oo oo oo oo oo | 0.064 | 0.373 | -0.098 | 0.066  | 1.41              | 0.10      | 0.072 | 0.408 | -0.157 | 0.071  | 1.25              | 0.01   | 0.073 | 0.411 | -0.177 | 0.072  | 1.26              | 0.00 |
|                     | oo ii oo ii oo ii | 0.064 | 0.351 | -0.066 | 0.064  | 1.70              | 0.10      | 0.073 | 0.394 | -0.136 | 0.073  | 1.38              | 0.01   | 0.073 | 0.395 | -0.145 | 0.073  | 1.42              | 0.00 |
|                     | oo oo ii oo oo ii | 0.064 | 0.359 | -0.079 | 0.065  | 1.60              | 0.10      | 0.073 | 0.399 | -0.144 | 0.072  | 1.34              | 0.01   | 0.073 | 0.400 | -0.157 | 0.073  | 1.36              | 0.00 |
|                     | oo oo oo ii oo oo | 0.064 | 0.366 | -0.089 | 0.065  | 1.50              | 0.10      | 0.072 | 0.404 | -0.151 | 0.072  | 1.29              | 0.01   | 0.073 | 0.406 | -0.168 | 0.072  | 1.31              | 0.00 |
|                     | oi oi oi oi oi oi | 0.064 | 0.351 | -0.066 | 0.064  | 1.70              | 0.10      | 0.073 | 0.394 | -0.136 | 0.073  | 1.38              | 0.01   | 0.073 | 0.395 | -0.145 | 0.073  | 1.42              | 0.00 |
|                     | oi io oi io oi io | 0.064 | 0.351 | -0.066 | 0.064  | 1.70              | 0.10      | 0.073 | 0.391 | -0.158 | 0.073  | 1.45              | 0.01   | 0.073 | 0.391 | -0.164 | 0.073  | 1.48              | 0.00 |
|                     | oi ii io ii io ii | 0.063 | 0.335 | -0.036 | 0.063  | 1.91              | 0.10      | 0.073 | 0.383 | -0.123 | 0.074  | 1.51              | 0.01   | 0.073 | 0.381 | -0.119 | 0.074  | 1.56              | 0.00 |
| c-P6 <sup>12+</sup> | ii ii ii ii ii ii | 0.081 | 0.465 | -0.285 | 0.090  | 1.42              | 0.09      | 0.107 | 0.579 | -0.521 | 0.113  | 0.93              | 0.02   | 0.106 | 0.575 | -0.518 | 0.113  | 0.97              | 0.03 |
|                     | oo oo oo oo oo oo | 0.083 | 0.493 | -0.403 | 0.089  | 0.71              | 0.03      | 0.106 | 0.587 | -0.639 | 0.105  | 0.50              | 0.01   | 0.106 | 0.587 | -0.662 | 0.105  | 0.51              | 0.01 |
|                     | oo ii oo ii oo ii | 0.082 | 0.480 | -0.355 | 0.089  | 1.04              | 0.03      | 0.106 | 0.583 | -0.594 | 0.109  | 0.70              | 0.01   | 0.106 | 0.581 | -0.603 | 0.109  | 0.73              | 0.02 |
|                     | oo oo ii oo oo ii | 0.082 | 0.485 | -0.372 | 0.089  | 0.93              | 0.03      | 0.106 | 0.585 | -0.611 | 0.107  | 0.63              | 0.01   | 0.106 | 0.583 | -0.624 | 0.108  | 0.65              | 0.02 |
|                     | oo oo oo ii oo oo | 0.083 | 0.489 | -0.388 | 0.089  | 0.82              | 0.03      | 0.106 | 0.586 | -0.626 | 0.106  | 0.56              | 0.01   | 0.106 | 0.585 | -0.643 | 0.106  | 0.58              | 0.01 |
|                     | oi oi oi oi oi oi | 0.082 | 0.475 | -0.351 | 0.088  | 1.09              | 0.02      | 0.106 | 0.581 | -0.590 | 0.108  | 0.71              | 0.01   | 0.106 | 0.578 | -0.600 | 0.108  | 0.74              | 0.01 |
|                     | oi io oi io oi io | 0.082 | 0.477 | -0.353 | 0.089  | 1.06              | 0.02      | 0.106 | 0.582 | -0.592 | 0.108  | 0.70              | 0.01   | 0.106 | 0.580 | -0.601 | 0.109  | 0.73              | 0.02 |
|                     | oi ii io ii io ii | 0.081 | 0.468 | -0.310 | 0.089  | 1.31              | 0.03      | 0.106 | 0.579 | -0.547 | 0.111  | 0.86              | 0.01   | 0.106 | 0.576 | -0.549 | 0.111  | 0.90              | 0.02 |

**Table S13** Aromaticity indices for several pathways of c-P6·T6, c-P6·T6<sup>4+</sup>, c-P6·T6<sup>6+</sup>, and c-P6·T6<sup>12+</sup> calculated at the B3LYP, CAM-B3LYP, and M06-2X/6-31G\* levels of theory.

| pathway                | B3LYP             |       |       |        |        |                   | CAM-B3LYP |       |       |        |        |                   | M06-2X |       |       |        |        |                   |      |
|------------------------|-------------------|-------|-------|--------|--------|-------------------|-----------|-------|-------|--------|--------|-------------------|--------|-------|-------|--------|--------|-------------------|------|
|                        | FLU               | BOA   | HOMA  | BLA    | AV1245 | AV <sub>min</sub> | FLU       | BOA   | HOMA  | BLA    | AV1245 | AV <sub>min</sub> | FLU    | BOA   | HOMA  | BLA    | AV1245 | AV <sub>min</sub> |      |
| c-P6·T6                | ii ii ii ii ii ii | 0.081 | 0.354 | -0.138 | 0.064  | 1.25              | 0.42      | 0.096 | 0.412 | -0.196 | 0.070  | 1.01              | 0.35   | 0.096 | 0.407 | -0.189 | 0.071  | 1.03              | 0.37 |
|                        | oo oo oo oo oo oo | 0.082 | 0.425 | -0.235 | 0.073  | 1.44              | 0.16      | 0.096 | 0.484 | -0.315 | 0.082  | 1.21              | 0.00   | 0.096 | 0.481 | -0.324 | 0.081  | 1.22              | 0.01 |
|                        | oo ii oo ii oo ii | 0.082 | 0.392 | -0.197 | 0.069  | 1.35              | 0.16      | 0.096 | 0.451 | -0.266 | 0.076  | 1.12              | 0.00   | 0.096 | 0.447 | -0.270 | 0.076  | 1.13              | 0.01 |
|                        | oo oo ii oo oo ii | 0.082 | 0.403 | -0.212 | 0.070  | 1.38              | 0.16      | 0.096 | 0.462 | -0.285 | 0.078  | 1.15              | 0.00   | 0.096 | 0.459 | -0.291 | 0.078  | 1.16              | 0.01 |
|                        | oo oo oo ii oo oo | 0.082 | 0.414 | -0.224 | 0.071  | 1.41              | 0.16      | 0.096 | 0.473 | -0.301 | 0.080  | 1.18              | 0.00   | 0.096 | 0.470 | -0.308 | 0.079  | 1.19              | 0.01 |
|                        | oi oi oi oi oi oi | 0.082 | 0.392 | -0.196 | 0.069  | 1.36              | 0.16      | 0.096 | 0.450 | -0.265 | 0.076  | 1.12              | 0.00   | 0.096 | 0.446 | -0.269 | 0.076  | 1.14              | 0.01 |
|                        | oi io oi io oi io | 0.082 | 0.392 | -0.196 | 0.069  | 1.35              | 0.17      | 0.096 | 0.451 | -0.266 | 0.076  | 1.11              | 0.01   | 0.096 | 0.447 | -0.271 | 0.076  | 1.12              | 0.02 |
|                        | oi ii ii io ii ii | 0.081 | 0.368 | -0.161 | 0.066  | 1.28              | 0.18      | 0.096 | 0.426 | -0.223 | 0.072  | 1.04              | 0.01   | 0.096 | 0.421 | -0.221 | 0.073  | 1.06              | 0.03 |
| c-P6·T6 <sup>4+</sup>  | ii ii ii ii ii ii | 0.068 | 0.328 | -0.078 | 0.065  | 1.85              | 0.87      | 0.073 | 0.352 | -0.094 | 0.070  | 1.67              | 0.75   | 0.073 | 0.006 | -0.087 | 0.072  | 1.73              | 0.75 |
|                        | oo oo oo oo oo oo | 0.069 | 0.383 | -0.169 | 0.067  | 1.55              | 0.08      | 0.074 | 0.402 | -0.184 | 0.070  | 1.49              | 0.06   | 0.074 | 0.409 | -0.200 | 0.071  | 1.51              | 0.00 |
|                        | oo ii oo ii oo ii | 0.068 | 0.357 | -0.134 | 0.066  | 1.69              | 0.08      | 0.074 | 0.379 | -0.149 | 0.070  | 1.57              | 0.08   | 0.074 | 0.385 | -0.156 | 0.071  | 1.62              | 0.01 |
|                        | oo oo ii oo oo ii | 0.069 | 0.369 | -0.155 | 0.068  | 1.64              | 0.08      | 0.074 | 0.392 | -0.172 | 0.072  | 1.53              | 0.06   | 0.074 | 0.397 | -0.187 | 0.073  | 1.57              | 0.00 |
|                        | oo oo oo ii oo oo | 0.069 | 0.374 | -0.158 | 0.067  | 1.60              | 0.08      | 0.074 | 0.397 | -0.179 | 0.071  | 1.51              | 0.06   | 0.074 | 0.402 | -0.187 | 0.071  | 1.54              | 0.00 |
|                        | oo oo oo ii oo oo | 0.068 | 0.357 | -0.132 | 0.066  | 1.70              | 0.09      | 0.074 | 0.379 | -0.146 | 0.070  | 1.58              | 0.06   | 0.074 | 0.385 | -0.152 | 0.071  | 1.63              | 0.01 |
|                        | oi io oi oi oi oi | 0.068 | 0.357 | -0.133 | 0.066  | 1.69              | 0.09      | 0.074 | 0.379 | -0.148 | 0.070  | 1.57              | 0.08   | 0.074 | 0.385 | -0.156 | 0.071  | 1.61              | 0.00 |
|                        | oi ii ii io ii ii | 0.068 | 0.339 | -0.102 | 0.066  | 1.79              | 0.09      | 0.073 | 0.359 | -0.109 | 0.069  | 1.64              | 0.13   | 0.073 | 0.366 | -0.113 | 0.071  | 1.69              | 0.08 |
| c-P6·T6 <sup>6+</sup>  | ii ii ii ii ii ii | 0.066 | 0.322 | -0.088 | 0.066  | 1.92              | 0.81      | 0.075 | 0.379 | -0.164 | 0.077  | 1.48              | 0.64   | 0.075 | 0.375 | -0.157 | 0.077  | 1.54              | 0.65 |
|                        | oo oo oo oo oo oo | 0.068 | 0.377 | -0.173 | 0.066  | 1.43              | 0.04      | 0.074 | 0.409 | -0.225 | 0.071  | 1.27              | 0.06   | 0.075 | 0.410 | -0.240 | 0.071  | 1.28              | 0.05 |
|                        | oo ii oo ii oo ii | 0.067 | 0.352 | -0.140 | 0.066  | 1.66              | 0.04      | 0.075 | 0.395 | -0.202 | 0.074  | 1.37              | 0.07   | 0.075 | 0.394 | -0.209 | 0.074  | 1.40              | 0.07 |
|                        | oo oo ii oo oo ii | 0.067 | 0.361 | -0.153 | 0.066  | 1.58              | 0.05      | 0.074 | 0.399 | -0.211 | 0.073  | 1.34              | 0.06   | 0.075 | 0.399 | -0.221 | 0.073  | 1.36              | 0.05 |
|                        | oo oo oo ii oo oo | 0.068 | 0.369 | -0.163 | 0.066  | 1.50              | 0.04      | 0.074 | 0.404 | -0.218 | 0.072  | 1.30              | 0.06   | 0.075 | 0.405 | -0.232 | 0.072  | 1.32              | 0.05 |
|                        | oi oi oi oi oi oi | 0.067 | 0.352 | -0.138 | 0.066  | 1.66              | 0.05      | 0.074 | 0.395 | -0.200 | 0.074  | 1.38              | 0.08   | 0.075 | 0.393 | -0.207 | 0.074  | 1.41              | 0.05 |
|                        | oi io oi io oi io | 0.067 | 0.347 | -0.141 | 0.066  | 1.67              | 0.14      | 0.075 | 0.391 | -0.216 | 0.074  | 1.43              | 0.07   | 0.075 | 0.390 | -0.222 | 0.075  | 1.46              | 0.08 |
|                        | oi ii ii io ii ii | 0.067 | 0.331 | -0.109 | 0.066  | 1.83              | 0.14      | 0.075 | 0.384 | -0.185 | 0.076  | 1.46              | 0.07   | 0.075 | 0.380 | -0.183 | 0.076  | 1.51              | 0.08 |
| c-P6·T6 <sup>12+</sup> | ii ii ii ii ii ii | 0.082 | 0.425 | -0.300 | 0.080  | 1.45              | 0.24      | 0.105 | 0.552 | -0.523 | 0.106  | 0.95              | 0.01   | 0.104 | 0.544 | -0.514 | 0.105  | 0.99              | 0.02 |
|                        | oo oo oo oo oo oo | 0.082 | 0.449 | -0.365 | 0.078  | 0.94              | 0.02      | 0.103 | 0.553 | -0.609 | 0.098  | 0.70              | 0.01   | 0.103 | 0.550 | -0.610 | 0.098  | 0.71              | 0.01 |
|                        | oo ii oo ii oo ii | 0.082 | 0.438 | -0.341 | 0.079  | 1.18              | 0.02      | 0.104 | 0.552 | -0.577 | 0.102  | 0.82              | 0.01   | 0.104 | 0.547 | -0.574 | 0.101  | 0.84              | 0.01 |
|                        | oo oo ii oo oo ii | 0.082 | 0.443 | -0.355 | 0.079  | 1.09              | 0.03      | 0.104 | 0.553 | -0.594 | 0.101  | 0.77              | 0.02   | 0.104 | 0.549 | -0.592 | 0.100  | 0.79              | 0.02 |
|                        | oo oo oo ii oo oo | 0.082 | 0.446 | -0.359 | 0.078  | 1.02              | 0.02      | 0.103 | 0.553 | -0.600 | 0.099  | 0.74              | 0.01   | 0.103 | 0.549 | -0.599 | 0.099  | 0.75              | 0.01 |
|                        | oi oi oi oi oi oi | 0.082 | 0.439 | -0.348 | 0.079  | 1.16              | 0.03      | 0.105 | 0.556 | -0.601 | 0.102  | 0.78              | 0.01   | 0.105 | 0.550 | -0.597 | 0.102  | 0.80              | 0.00 |
|                        | oi io oi io oi io | 0.083 | 0.440 | -0.354 | 0.079  | 1.14              | 0.02      | 0.104 | 0.554 | -0.587 | 0.102  | 0.79              | 0.01   | 0.104 | 0.549 | -0.584 | 0.101  | 0.82              | 0.00 |
|                        | oi ii ii io ii ii | 0.083 | 0.431 | -0.325 | 0.080  | 1.33              | 0.06      | 0.105 | 0.552 | -0.544 | 0.105  | 0.90              | 0.01   | 0.104 | 0.545 | -0.537 | 0.104  | 0.94              | 0.00 |

### 4.3.1 1245-index distribution plots

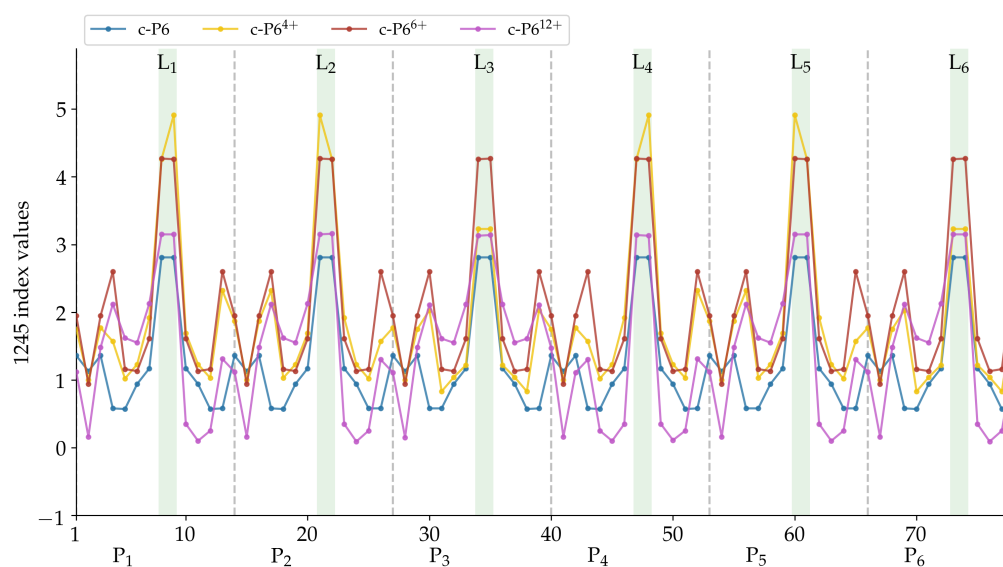

**Figure S5** 1245-index distribution including the individual MCI(1,2,4,5) values along the most aromatic path of c-P6, c-P6<sup>4+</sup>, c-P6<sup>6+</sup>, and c-P6<sup>12+</sup> calculated at the B3LYP/6-31G\* level of theory.

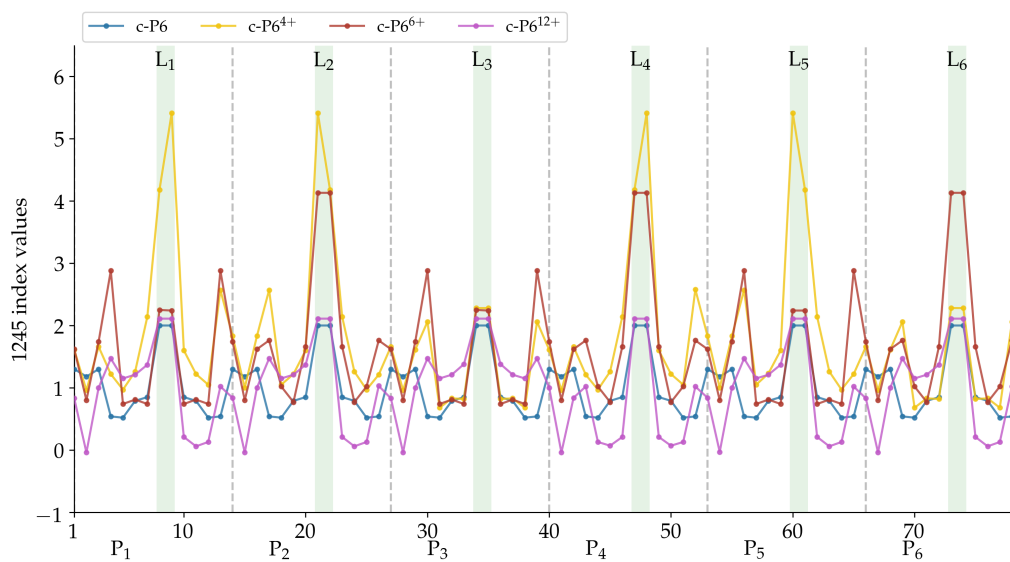

**Figure S6** 1245-index distribution including the individual MCI(1,2,4,5) values along the most aromatic path of c-P6, c-P6<sup>4+</sup>, c-P6<sup>6+</sup>, and c-P6<sup>12+</sup> calculated at the M06-2X/6-31G\* level of theory.

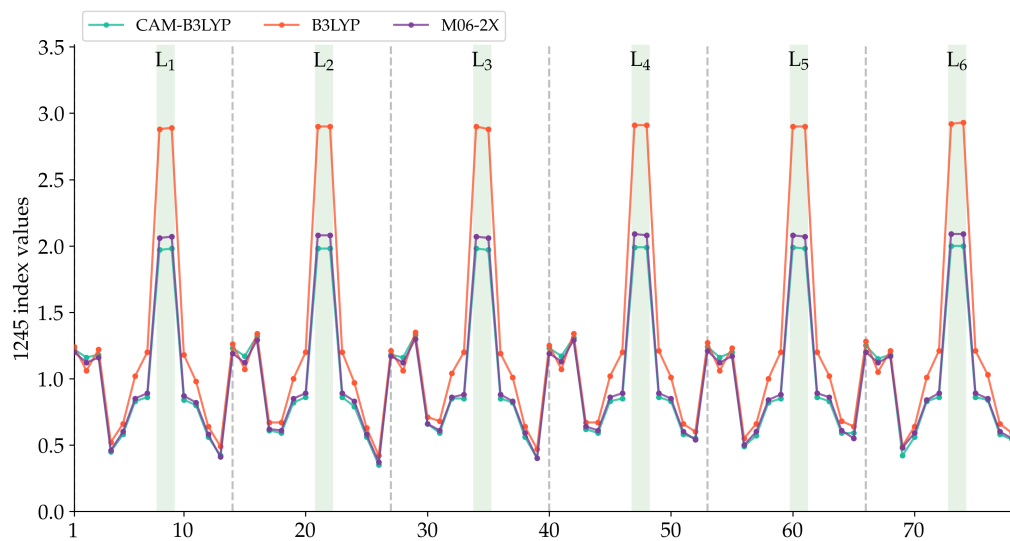

**Figure S7** Comparison of the 1245-index distributions including the individual MCI(1,2,4,5) values along the most aromatic path of c-P6·T6 calculated at different levels of theory.

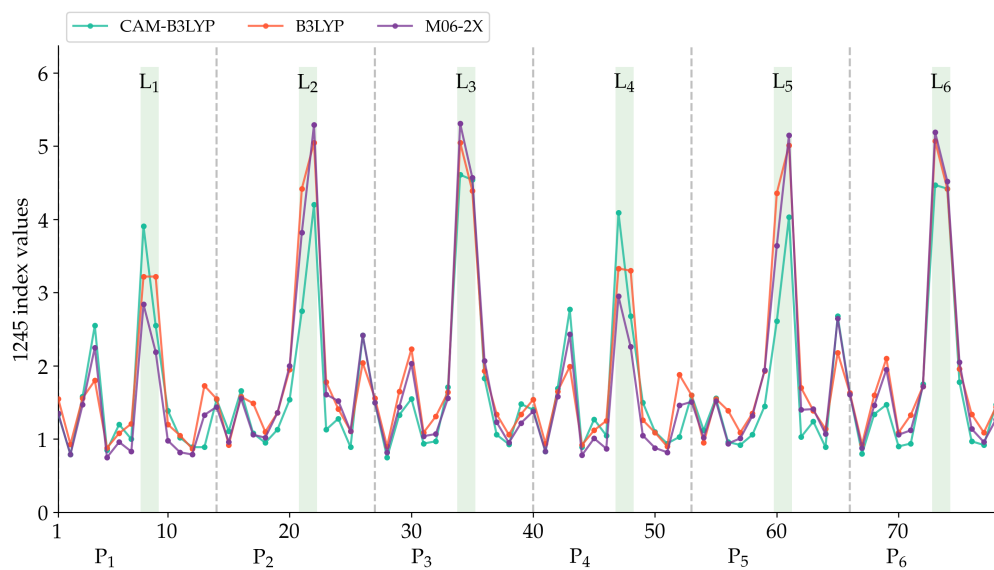

**Figure S8** Comparison of the 1245-index distributions including the individual MCI(1,2,4,5) values along the most aromatic path of  $c\text{-P6}\cdot\text{T6}^{4+}$  calculated at different levels of theory.

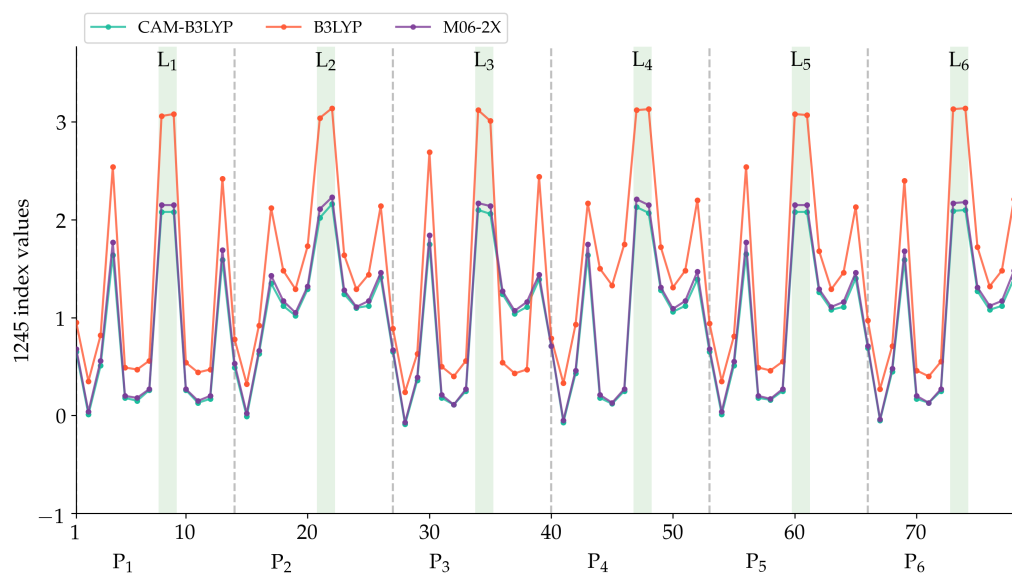

**Figure S9** Comparison of the 1245-index distributions including the individual MCI(1,2,4,5) values along the most aromatic path of  $c\text{-P6}\cdot\text{T6}^{12+}$  calculated at different levels of theory.

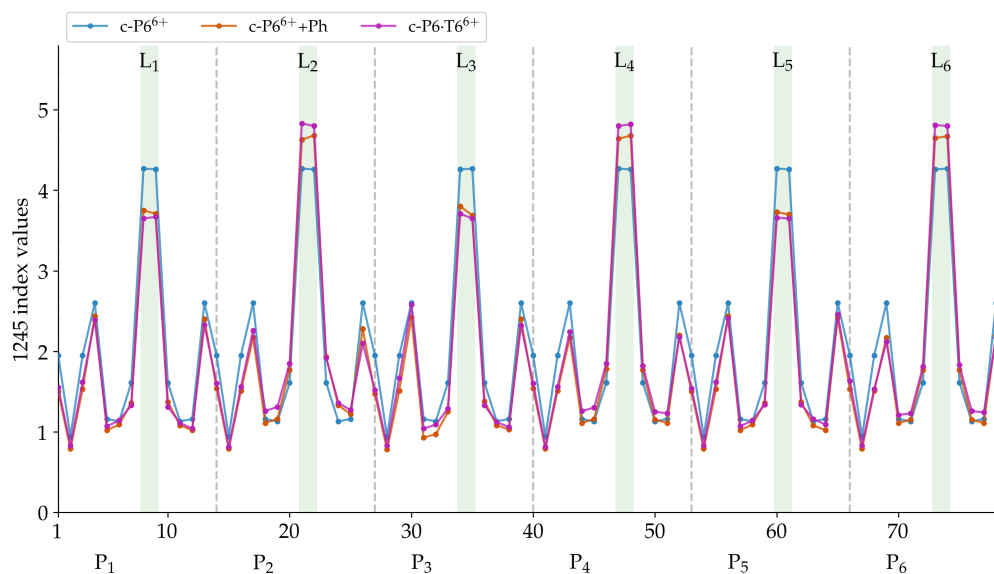

**Figure S10** 1245-index distribution including the individual MCI(1,2,4,5) values along the most aromatic path of c-P6<sup>6+</sup>, c-P6<sup>6+</sup> with Ph substituents, and c-P6·T6<sup>6+</sup> calculated at the B3LYP/6-31G\* level of theory.

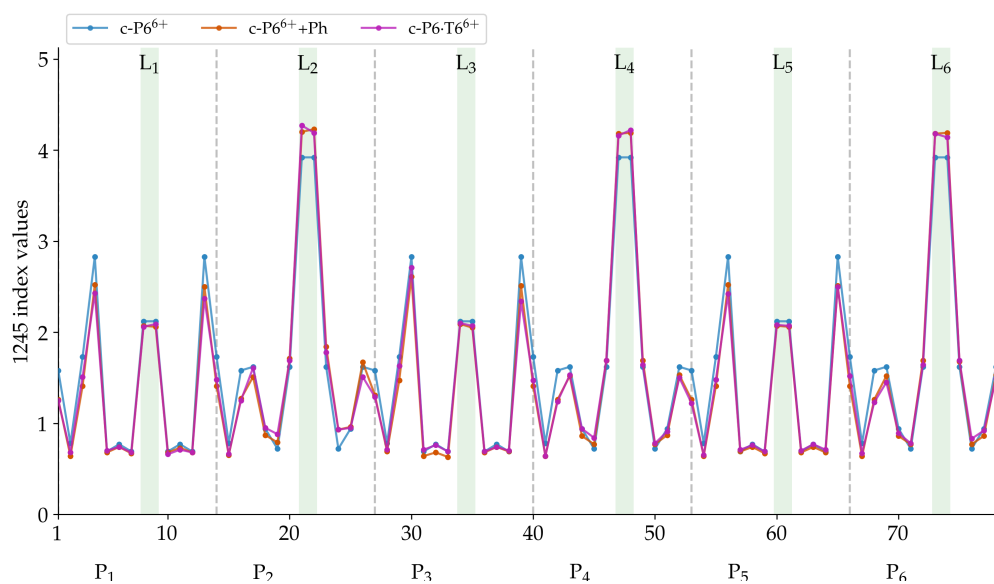

**Figure S11** 1245-index distribution including the individual MCI(1,2,4,5) values along the most aromatic path of c-P6<sup>6+</sup>, c-P6<sup>6+</sup> with Ph substituents, and c-P6·T6<sup>6+</sup> calculated at the CAM-B3LYP/6-31G\* level of theory.

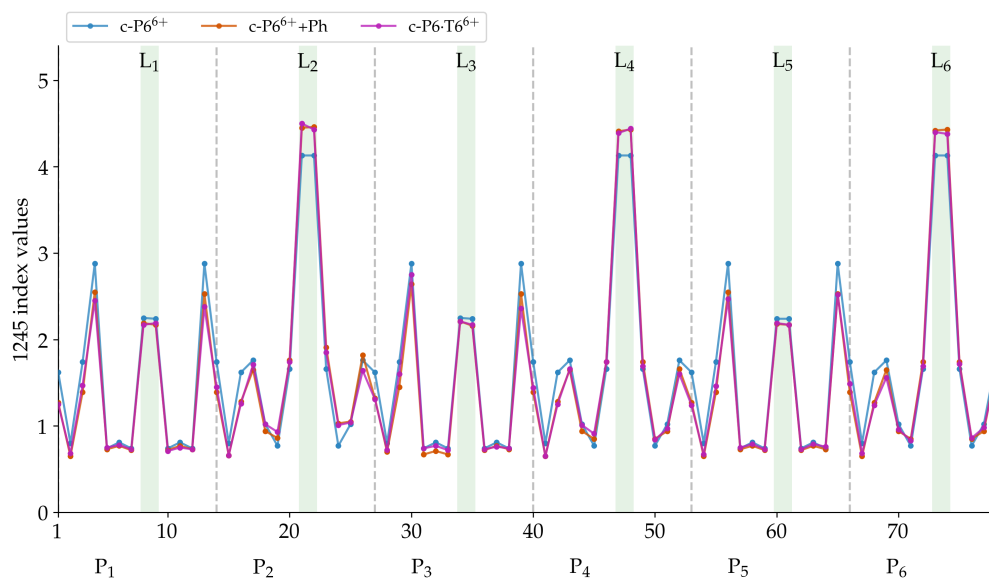

**Figure S12** 1245-index distribution along the most aromatic path of  $c\text{-P6}^{6+}$ ,  $c\text{-P6}^{6+}$  with Ph substituents, and  $c\text{-P6-T6}^{6+}$  calculated at the M06-2X/6-31G\* level of theory.

### 4.3.2 ACID plots

ACID calculations were performed using the CSGT method with B3LYP and CAM-B3LYP density functional approximations in combination with the 6-31G\* basis set, including Grimme's dispersion (no solvent model was employed). In Figures S13 and S14, we present two perspectives of the ACID plots for the four oxidation states of the nanoring at the B3LYP/6-31G\* computational level. The former picture can be used to assess the local aromaticity of the porphyrin, whereas the latter is useful in analyzing the global aromaticity of nanoring. Similar pictures of the CAM-B3LYP geometries can be found in the manuscript.

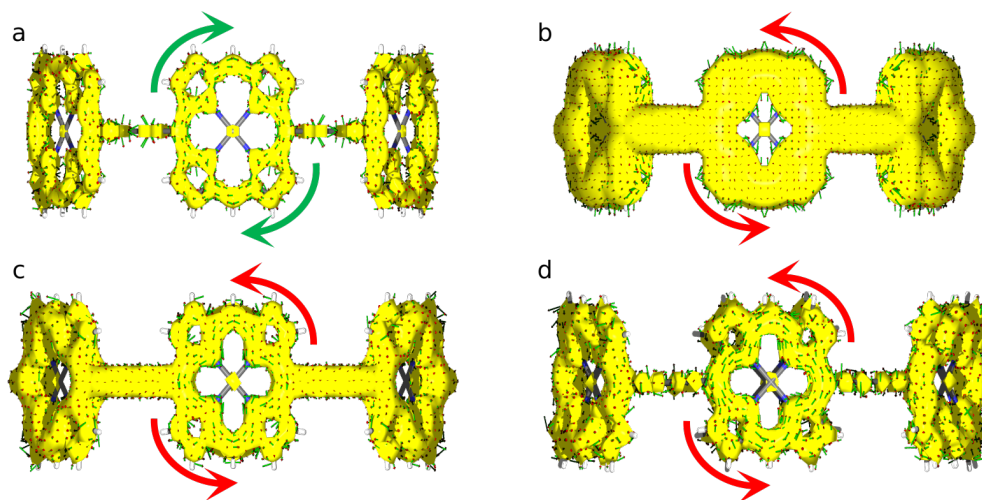

**Figure S13** ACID isosurface plots (isocontour value 0.06) for a)  $c\text{-P6}$ , b)  $c\text{-P6}^{4+}$ , c)  $c\text{-P6}^{6+}$ , and d)  $c\text{-P6}^{12+}$  at the B3LYP/6-31G\* level of theory (employed for both geometry optimization and ACID calculation).

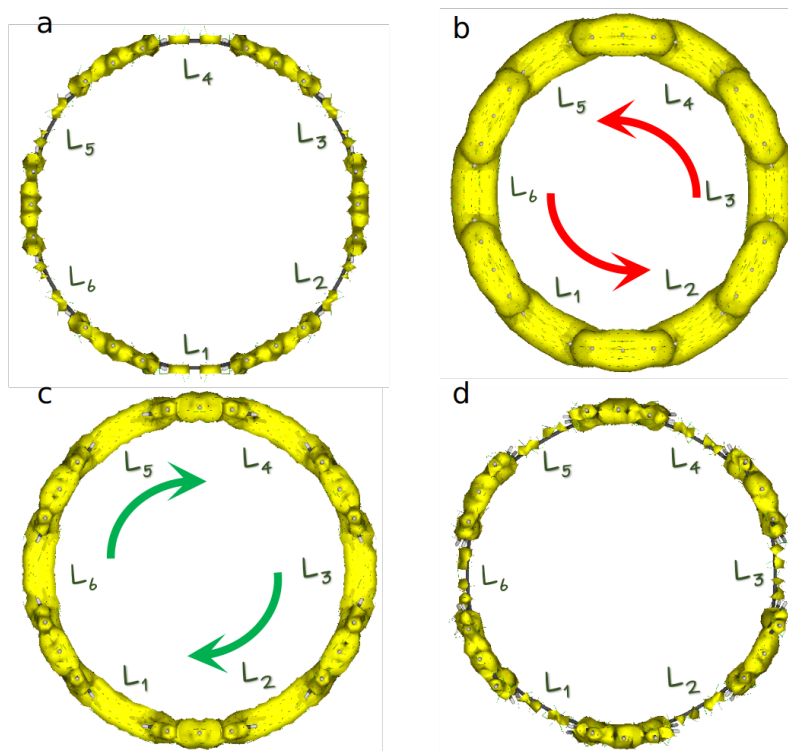

**Figure S14** ACID isosurface plots (isocontour value 0.06) for a) c-P6, b) c-P6<sup>4+</sup>, c) c-P6<sup>6+</sup>, and d) c-P6<sup>12+</sup> using B3LYP/6-31G\* level of theory (employed for both geometry optimization and ACID calculation).

### 4.3.3 NICS

NICS values calculated with CAM-B3LYP and B3LYP density functional approximations in combination with the 6-31G\* basis set. NICS(0,0) refers to the NICS value computed at the center of the nanoring (blue circle), whereas NICS(20,20) corresponds to the NICS value calculated at point (20,20) (orange circle) of a frame centered at the center of the nanoring with x- and y-axis pointing towards one linker and the center of a porphyrin, respectively (see Figure S15). Therefore, (20,20) corresponds to a point outside the nanoring at a fairly large distance. The distance unit is Ångstroms (Å).

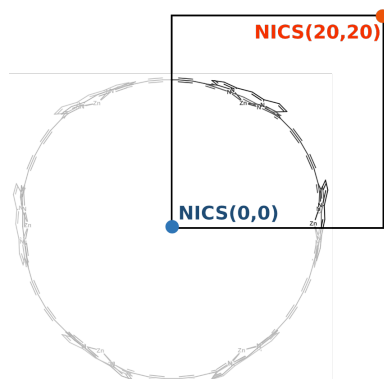

| Species             | CAM-B3LYP |             | B3LYP     |             |
|---------------------|-----------|-------------|-----------|-------------|
|                     | NICS(0,0) | NICS(20,20) | NICS(0,0) | NICS(20,20) |
| c-P6                | -1.68     | -0.08       | -1.42     | -0.09       |
| c-P6 <sup>4+</sup>  | 0.88      | -0.12       | 102.24    | -6.46       |
| c-P6 <sup>6+</sup>  | -0.42     | -0.01       | -13.36    | 0.86        |
| c-P6 <sup>12+</sup> | 0.47      | 0.02        | 1.37      | 0.08        |

**Figure S15 & Table S14** NICS(0,0) and NICS(20,20) values.

We have checked the dependency of the NICS with the basis set and included these results in Tables S15 and S16. Since there is a good agreement between the experimental and computational data for c-P6 and c-P6<sup>12+</sup> (regardless of the density functional approximation employed in the calculation), we have only included the results for c-P6<sup>4+</sup> and c-P6<sup>6+</sup>. In particular, we have performed optimization and NMR calculations using various combinations of 6-31G\*, 6-31+G\*, and 6-311+G\* basis sets. As we can see in Tables S15, the results barely change with the basis set size for c-P6<sup>6+</sup> and only small changes occur in the case of c-P6<sup>4+</sup> (see Table S16). All in all, the conclusions drawn in the manuscript are not affected by the use of the 6-31G\* basis set.



**Table S15** NICS(0,0) and NICS(20,20) values for c-P6<sup>6+</sup> using B3LYP and CAM-B3LYP with different basis set for the optimization and the calculation of the NICS (NMR).

| Optimization       | NMR                | NICS(0,0) | NICS(20,20) |
|--------------------|--------------------|-----------|-------------|
| B3LYP/6-31G*       | B3LYP/6-31G*       | -13.36    | 0.86        |
| B3LYP/6-31G*       | B3LYP/6-31+G*      | -13.51    | 0.85        |
| B3LYP/6-31G*       | B3LYP/6-311+G*     | -13.51    | 0.85        |
| B3LYP/6-31+G*      | B3LYP/6-31+G*      | -13.61    | 0.87        |
| B3LYP/6-311+G*     | B3LYP/6-311+G*     | -13.62    | 0.86        |
| CAM-B3LYP/6-31G*   | CAM-B3LYP/6-31G*   | -0.42     | -0.01       |
| CAM-B3LYP/6-31G*   | CAM-B3LYP/6-31+G*  | -0.52     | -0.01       |
| CAM-B3LYP/6-31G*   | CAM-B3LYP/6-311+G* | -0.48     | -0.01       |
| CAM-B3LYP/6-31+G*  | CAM-B3LYP/6-31+G*  | -0.53     | -0.01       |
| CAM-B3LYP/6-311+G* | CAM-B3LYP/6-311+G* | -0.49     | -0.02       |
| CAM-B3LYP/6-31G*   | B3LYP/6-31G*       | -1.61     | 0.10        |

**Table S16** NICS(0,0) and NICS(20,20) values for c-P6<sup>4+</sup> using B3LYP and CAM-B3LYP with different basis set for the optimization and the calculation of the NICS (NMR).

| Optimization       | NMR                | NICS(0,0) | NICS(20,20) |
|--------------------|--------------------|-----------|-------------|
| B3LYP/6-31G*       | B3LYP/6-31G*       | 102.24    | -6.46       |
| B3LYP/6-31G*       | B3LYP/6-31+G*      | 96.13     | -6.10       |
| B3LYP/6-31G*       | B3LYP/6-311+G*     | 96.44     | -6.12       |
| B3LYP/6-31+G*      | B3LYP/6-31+G*      | 90.44     | -5.63       |
| B3LYP/6-311+G*     | B3LYP/6-311+G*     | 86.03     | -5.31       |
| CAM-B3LYP/6-31G*   | CAM-B3LYP/6-31G*   | 0.88      | -0.12       |
| CAM-B3LYP/6-31G*   | CAM-B3LYP/6-31+G*  | 0.71      | -0.12       |
| CAM-B3LYP/6-31G*   | CAM-B3LYP/6-311+G* | 0.71      | -0.12       |
| CAM-B3LYP/6-31+G*  | CAM-B3LYP/6-31+G*  | 0.61      | -0.12       |
| CAM-B3LYP/6-311+G* | CAM-B3LYP/6-311+G* | 0.56      | -0.11       |
| CAM-B3LYP/6-31G*   | B3LYP/6-31G*       | 28.18     | -1.75       |

## 5 Aromaticity indices

In the present section, the aromaticity indices used in the manuscript will be briefly reviewed. Henceforth, we will use the short-hand notation  $\mathbf{1} \equiv (\vec{r}_1, \sigma_1)$  to denote the coordinates of an electron and  $d\mathbf{1} \equiv d\vec{r}_1, d\sigma_1$  for the electron positions and their derivatives. To provide a general expression, we will consider a molecule including at least one ring structure consisting of  $n$  atoms, represented by the string  $\mathcal{A} = \{A_1, A_2, \dots, A_n\}$  and whose elements are ordered according to the connectivity of the atoms in the ring.

First of all, we will define the delocalization index (DI)<sup>21,22,26</sup> using the exchange-correlation density (XCD)<sup>55</sup> between points belonging to two different atoms  $A_1$  and  $A_2$ ,

$$\delta(A_1, A_2) = 2 \int_{A_1} \int_{A_2} d\mathbf{1} d\mathbf{2} \rho_{xc}(\mathbf{1}, \mathbf{2}) = -2 \text{cov}(N_{A_1}, N_{A_2}), \quad (1)$$

where  $N_{A_1}$  and  $N_{A_2}$  are the atomic populations of atoms  $A_1$  and  $A_2$ . The delocalization index is related to the covariance of these populations and, for this reason, the DI is a measure of the number of electrons fluctuating between these atoms concurrently. On the other hand, the localization index (LI) is defined as

$$\lambda(A) = \int_A \int_A d\mathbf{1} d\mathbf{2} \rho_{xc}(\mathbf{1}, \mathbf{2}), \quad (2)$$

where we integrate the two points of the XCD over the same atom  $A_1$ .

Secondly, we define the geometric aromaticity indices: the so-called harmonic oscillator model of aromaticity (HOMA)<sup>56</sup> and the bond-length alternation (BLA). Kruszewski and Krygowski defined the former, and they used bond-length references,  $R_{opt}$ , to compare with the actual bond length of the ring structure:

$$HOMA(\mathcal{A}) = 1 - \frac{1}{n} \sum_i^n \alpha_i (r_{opt} - r_{A_i A_{i+1}})^2, \quad (3)$$

where  $r_{A,B}$  is the distance between atoms  $A$  and  $B$ , and  $\alpha_i$  is an empirical constant fixed to give values close to one for aromatic species and small or negative values for non-aromatic and antiaromatic species. The geometrical data of reference ( $R_{opt}$ ) is such that the compression energy of the double bond and the expansion energy of the single bond are minimal in accordance with the harmonic potential model. The bond-length alternation indicator compares the bond-length among the consecutive bonds along the perimeter of the ring,

$$BLA(\mathcal{A}) = \frac{1}{2n} \sum_{i=1}^n |r_{A_i A_{i+1}} - r_{A_{i+1} A_{i+2}}|, \quad (4)$$

where  $n_1 = \lfloor (n+1)/2 \rfloor$  and  $n_2 = \lfloor n/2 \rfloor$ ,  $\lfloor n \rfloor$  being floor function of  $x$ , which returns the largest integer less than or equal to  $x$ .

We now consider the electronic aromaticity indices. The bond-order alternation (BOA) is one of the most popular aromatic indicators, and it corresponds to the electronic structure analogous to BLA. BOA uses bond orders or electron-sharing indices<sup>26</sup> rather than the bond length,

$$BOA(\mathcal{A}) = \frac{1}{2n} \sum_{i=1}^n |\delta(A_i, A_{i+1}) - \delta(A_{i+1}, A_{i+2})|. \quad (5)$$

Aromaticity indicators based on bond orders, such as BLA or FLU (see below), do not have a strong dependency on the computational method used.<sup>57</sup>

Just as we had the electronic counterpart of BLA, we have the counterpart of HOMA, the aromatic fluctuation index (FLU), which goes beyond the bond length information employed in HOMA.<sup>19,20</sup> The FLU index also employs references to measure the electron delocalization:

$$FLU(\mathcal{A}) = \frac{1}{n} \sum_{i=1}^n \left[ \left( \frac{\delta(A_i)}{\delta(A_{i-1})} \right)^\alpha \left( \frac{\delta(A_i, A_{i-1}) - \delta_{ref}(A_i, A_{i-1})}{\delta_{ref}(A_i, A_{i-1})} \right) \right]^2 \quad (6)$$

where  $\alpha$  is a simple function to ensure the first term in Eq. 6 is always greater or equal to 1,

$$\alpha \begin{cases} 1 & \delta(A_{i-1}) \leq \delta(A_i) \\ -1 & \delta(A_i) < \delta(A_{i-1}) \end{cases} \quad (7)$$

and  $\delta_{ref}(A,B)$  is the DI of an aromatic molecule of reference. For C-C bonds, benzene is used as a reference while the C-N value is taken from pyridine.<sup>19</sup> When the molecule is aromatic, the FLU index will be close to zero, whereas for non-aromatic or antiaromatic species it will be greater than zero.

Giambiagi employed one of the most reliable electronic multicenter indices as an aromaticity index. This many-center electron delocalization index ( $I_{ring}$ ) measures the delocalization along the ring:<sup>58</sup>

$$I_{ring}(\mathcal{A}) = \sum_{i_1 i_2 \dots i_n}^{occ} S_{i_1 i_2}(A_1) S_{i_2 i_3}(A_2) \dots S_{i_n, i_1}(A_n) \quad (8)$$

and if one takes into account all the permutations of the atoms in the ring, thus including delocalization patterns across the ring, we obtain the expression of the multicenter index (MCI):<sup>28</sup>

$$MCI(\mathcal{A}) = \frac{1}{2n} \sum_{\mathcal{P}(\mathcal{A})} I_{ring}(\mathcal{A}) = \frac{1}{2n} \sum_{\mathcal{P}(\mathcal{A})} \sum_{i_1 i_2 \dots i_n}^{occ} S_{i_1 i_2}(A_1) S_{i_2 i_3}(A_2) \dots S_{i_n, i_1}(A_n) \quad (9)$$

where  $\mathcal{P}(\mathcal{A})$  stands for the  $n!$  permutations of the elements in the string  $\mathcal{A}$ . Like  $I_{ring}$ , MCI gives large numbers for aromatic species and the authors claim negative values for antiaromatic molecules.<sup>59</sup> However, these two electronic indices are not suitable for large (anti)aromatic molecules because they scale exponentially with the number of atoms in the ring and present large numerical errors derived from the numerical integration of the atomic overlap matrices.

In order to solve the drawbacks of  $I_{ring}$  and MCI, one of us defined the AV1245 index<sup>16</sup> as the average value of the four-atom MCI index between relative positions 1-2 and 4-5 constructed from every five consecutive atoms along the perimeter of the ring. Lately, it has been seen that the average value could hinder some important values and that the minimal value of the index,  $AV_{min}$ ,<sup>17,43</sup> could be more useful. The  $AV_{min}$  value corresponds to the least delocalized fragment of the ring. Aromatic molecules present large values of  $AV_{min}$  while non-aromatic molecules exhibit low values. Antiaromatic molecules are more difficult to identify because they usually present intermediate values of  $AV_{min}$ . To identify the antiaromatic molecules, we could help ourselves using BOA values (if the species are smaller) or the 1245-index distributions plots (from which the average value, AV1245, is obtained) along the ring (see *e.g.*, Figure S12).

Finally, we have the magnetic aromaticity indices. When an (anti)aromatic species is exposed to an external field, this field induces a  $\pi$ -electron ring current that can be measured to characterize the molecule either as an aromatic or antiaromatic molecule. Aromatic molecules will show diatropic ring currents. On the contrary, the antiaromatic species will present paratropic ring currents. The most important and popular magnetic index of aromaticity is the nucleus independent chemical shift (NICS) due to Paul Schleyer and co-workers.<sup>30</sup> NICS is defined as the negative value of the absolute shielding computed at a certain point of the space. It is usually calculated at the center of the ring, NICS(0). However, it could also be calculated in other important points (see *e.g.*, Table S14), or one could calculate a NICS scan along some region of the space to obtain a NICS grid plot (see manuscript).<sup>60</sup> Negative values are a signature of aromaticity, whereas positive values indicate antiaromaticity. Another well-known magnetic index is the Anisotropy of the Induced Current Density (ACID)<sup>29</sup>. Using the ACID software,<sup>29</sup> one can visualize ACID scalar field isosurfaces and the current density vectors (see *e.g.* Figure S14).

## Notes and references

- [1] M. D. Peeks, T. D. Claridge, H. L. Anderson, *Nature* **2017**, *541*, 200–205.
- [2] M. J. Frisch, G. W. Trucks, H. B. Schlegel, G. E. Scuseria, M. A. Robb, J. R. Cheeseman, G. Scalmani, V. Barone, G. A. Petersson, H. Nakatsuji, X. Li, M. Caricato, A. V. Marenich, J. Bloino, B. G. Janesko, R. Gomperts, B. Mennucci, H. P. Hratchian, J. V. Ortiz, A. F. Izmaylov, J. L. Sonnenberg, D. Williams-Young, F. Ding, F. Lipparini, F. Egidi, J. Goings, B. Peng, A. Petrone, T. Henderson, D. Ranasinghe, V. G. Zakrzewski, J. Gao, N. Rega, G. Zheng, W. Liang, M. Hada, M. Ehara, K. Toyota, R. Fukuda, J. Hasegawa, M. Ishida, T. Nakajima, Y. Honda, O. Kitao, H. Nakai, T. Vreven, K. Throssell, J. A. Montgomery, Jr., J. E. Peralta, F. Ogliaro, M. J. Bearpark, J. J. Heyd, E. N. Brothers, K. N. Kudin, V. N. Staroverov, T. A. Keith, R. Kobayashi, J. Normand, K. Raghavachari, A. P. Rendell, J. C. Burant, S. S. Iyengar, J. Tomasi, M. Cossi, J. M. Millam, M. Klene, C. Adamo, R. Cammi, J. W. Ochterski, R. L. Martin, K. Morokuma, O. Farkas, J. B. Foresman, D. J. Fox, „Gaussian–16 Revision C.01“, **2016**, gaussian Inc. Wallingford CT.
- [3] A. D. Becke, *J. Chem. Phys.* **1993**, *98*, 5648–5652.
- [4] P. J. Stephens, F. J. Devlin, C. F. Chabalowski, M. J. Frisch, *J. Phys. Chem.* **1994**, *98*, 11623–11627.
- [5] C. Lee, Y. Yang, R. G. Parr, *Phys. Rev.* **1988**, *B37*, 785–789.
- [6] S. H. Vosko, L. Wilk, M. Nusair, *Can. J. Phys.* **1980**, *58*, 1200–1211.
- [7] T. Yanai, D. P. Tew, N. C. Handy, *Chem. Phys. Lett.* **2004**, *393*, 51–57.
- [8] O. A. Vydrov, G. E. Scuseria, *J. Chem. Phys.* **2006**, *125*, 234109.
- [9] Y. Zhao, D. G. Truhlar, *Theor. Chem. Acc.* **2008**, *120*, 215–241.
- [10] S. Grimme, *J. Chem. Phys.* **2006**, *124*, 034108.
- [11] W. J. Hehre, R. Ditchfield, J. A. Pople, *J. Chem. Phys.* **1972**, *56*, 2257–2261.
- [12] F. Neese, *WIREs, Comput. Mol. Sci.* **2018**, *8*, e1327.
- [13] C. Riplinger, B. Sandhoefer, A. Hansen, F. Neese, *J. Chem. Phys.* **2013**, *139*, 134101.
- [14] F. Weigend, A. Köhn, C. Hättig, *J. Chem. Phys.* **2002**, *116*, 3175–3183.
- [15] F. Weigend, R. Ahlrichs, *Phys. Chem. Chem. Phys.* **2005**, *7*, 3297–3305.
- [16] E. Matito, *Phys. Chem. Chem. Phys.* **2016**, *18*, 11839–11846.
- [17] C. García-Fernández, E. Sierda, M. Abadía, B. E. C. Bugenhagen, M. H. Prosenc, R. Wiesendanger, M. Bazarnik, J. E. Ortega, J. Brede, E. Matito, A. Arnau, *J. Phys. Chem. C* **2017**, *121*, 27118–27125.
- [18] I. Casademont-Reig, E. Ramos-Cordoba, M. Torrent-Sucarrat, E. Matito, *Molecules* **2020**, *25*, 711.
- [19] E. Matito, M. Duran, M. Solà, *J. Chem. Phys.* **2005**, *122*, 014109.
- [20] E. Matito, M. Duran, M. Solà, *J. Chem. Phys.* **2006**, *125*, 059901.
- [21] R. F. W. Bader, M. E. Stephens, *J. Am. Chem. Soc.* **1975**, *97*, 7391–7399.
- [22] X. Fradera, M. A. Austen, R. F. W. Bader, *J. Phys. Chem. A* **1999**, *103*, 304–314.
- [23] R. F. W. Bader, *Atoms in Molecules: A Quantum Theory*, Oxford University Press, Oxford, **1990**.
- [24] T. A. Keith, „AIMAll (Version 14.11.23)“, **2014**, tk Gristmill Software, Overland Park KS, USA (aim.tkgristmill.com).
- [25] E. Matito, „ESI-3D: Electron Sharing Indices Program for 3D Molecular Space Partitioning“, **2015**, institute of Computational Chemistry and Catalysis, University of Girona, Catalonia, Spain.
- [26] E. Matito, M. Solà, P. Salvador, M. Duran, *Faraday Discuss.* **2007**, *135*, 325–345.
- [27] M. K. Cyranski, *Chem. Rev.* **2005**, *105*, 3773–3811.
- [28] P. Bultinck, R. Ponec, S. Van Damme, *J. Phys. Org. Chem.* **2005**, *18*, 706–718.
- [29] D. Geuenich, K. Hess, F. Köhler, R. Herges, *Chem. Rev.* **2005**, *105*, 3758–3772.
- [30] P. v. R. Schleyer, C. Maerker, A. Dransfeld, H. Jiao, N. J. v. E. Hommes, *J. Am. Chem. Soc.* **1996**, *118*, 6317–6318.
- [31] P. v. R. Schleyer, H. Jiao, N. J. v. E. Hommes, V. G. Malkin, O. L. Malkina, *J. Am. Chem. Soc.* **1997**, *119*, 12669–12670.
- [32] C. Corminboeuf, T. Heine, G. Seifert, P. von Rague Schleyer, J. Weber, *Phys. Chem. Chem. Phys.* **2004**, *6*, 273–276.
- [33] H. Fallah-Bagher-Shaidaei, C. S. Wannere, C. Corminboeuf, R. Puchta, P. v. R. Schleyer, *Org. Lett.* **2006**, *8*, 863–866.
- [34] Z. Chen, C. S. Wannere, C. Corminboeuf, R. Puchta, P. v. R. Schleyer, *Chem. Rev.* **2005**, *105*, 3842–3888.
- [35] M. J. Frisch, G. W. Trucks, H. B. Schlegel, G. E. Scuseria, M. A. Robb, J. R. Cheeseman, G. Scalmani, V. Barone, B. Mennucci, G. A. Petersson, H. Nakatsuji, M. Caricato, X. Li, H. P. Hratchian, A. F. Izmaylov, J. Bloino, G. Zheng, J. L. Sonnenberg, M. Hada, M. Ehara, K. Toyota, R. Fukuda, J. Hasegawa, M. Ishida, T. Nakajima, Y. Honda, O. Kitao, H. Nakai, T. Vreven, J. A. Montgomery, Jr., J. E. Peralta, F. Ogliaro, M. Bearpark, J. J. Heyd, E. Brothers, K. N. Kudin, V. N. Staroverov, R. Kobayashi, J. Normand, K. Raghavachari, A. Rendell, J. C. Burant, S. S. Iyengar, J. Tomasi, M. Cossi, N. Rega, J. M. Millam, M. Klene, J. E. Knox, J. B. Cross, V. Bakken, C. Adamo, J. Jaramillo, R. Gomperts, R. E. Stratmann, O. Yazyev, A. J. Austin, R. Cammi, C. Pomelli, J. W. Ochterski, R. L. Martin, K. Morokuma, V. G. Zakrzewski, G. A. Voth, P. Salvador, J. J. Dannenberg, S. Dapprich, A. D. Daniels, Ö. Farkas, J. B. Foresman, J. V. Ortiz, J. Cioslowski, D. J. Fox, „Gaussian 09 Revision D.01“, gaussian Inc. Wallingford CT 2009.
- [36] T. Plachetka, in *Proc. of Spring Conf. on Computer Graphics, Budmerice, Slovakia*, , Bd. 123Bd. 123, **1998** .
- [37] E. Ramos-Cordoba, V. Postils, P. Salvador, *J. Chem. Theory Comput.* **2015**, *11*, 1501–1508.
- [38] V. Postils, C. Delgado-Alonso, J. M. Luis, P. Salvador, *Angew. Chem. Int. Ed.* **2018**, *130*, 10685–10689.
- [39] J. Charnley, L. Bratholm, „Calculate Root-mean-square deviation (RMSD) of Two Molecules Using Rotation“, gitHub, v.1.3.2.
- [40] J. Tomasi, B. Mennucci, R. Cammi, *Chem. Rev.* **2005**, *105*, 2999–3094.
- [41] W. Kabsch, *Acta Crystallographica Section A: Crystal Physics, Diffraction, Theoretical and General Crystallography* **1976**, *32*, 922–923.

- [42] M. W. Walker, L. Shao, R. A. Volz, *CVGIP: image understanding* **1991**, *54*, 358–367.
- [43] I. Casademont-Reig, T. Woller, J. Contreras-García, M. Alonso, M. Torrent-Sucarrat, E. Matito, *Phys. Chem. Chem. Phys.* **2018**, *20*, 2787–2796.
- [44] I. Casademont-Reig, E. Ramos-Cordoba, M. Torrent-Sucarrat, E. Matito, *Aromaticity: Modern Computational Methods and Applications* Aromaticity descriptors based on electron delocalization, S. 235–258, Elsevier, The Netherlands, **2021**.
- [45] M. Torrent-Sucarrat, S. Navarro, F. P. Cossío, J. M. Anglada, J. M. Luis, *J. Comput. Chem.* **2017**, *38*, 2819–2828.
- [46] M. Torrent-Sucarrat, S. Navarro, E. Marcos, J. M. Anglada, J. M. Luis, *J. Phys. Chem. C* **2017**, *121*, 19348–19357.
- [47] C. S. Wannere, K. W. Sattelmeyer, H. F. Schaefer III, P. v. R. Schleyer, *Angew. Chem. Int. Ed.* **2004**, *43*, 4200–4206.
- [48] J. Sancho-García, A. Pérez-Jiménez, *Phys. Chem. Chem. Phys.* **2007**, *9*, 5874–5879.
- [49] D. W. Szczepanik, M. Solà, M. Andrzejak, B. Pawełek, J. Dominikowska, M. Kukułka, K. Dyduch, T. M. Krygowski, H. Szatyłowicz, *J. Comput. Chem.* **2017**, *38*, 1640–1654.
- [50] T. Woller, A. Banerjee, N. Sylvetsky, G. Santra, X. Deraet, F. De Profit, J. M. Martin, M. Alonso, *J. Phys. Chem. A* **2020**, *124*, 2380–2397.
- [51] T. M. Henderson, A. F. Izmaylov, G. Scalmani, G. E. Scuseria, *J. Chem. Phys.* **2009**, *131*, 044108.
- [52] A. J. Cohen, P. Mori-Sánchez, W. Yang, *Science* **2008**, *321*, 792–794.
- [53] M. Rickhaus, M. Jirasek, L. Tejerina, H. Gotfredsen, M. D. Peeks, R. Haver, H.-W. Jiang, T. D. Claridge, H. L. Anderson, *Nat. Chem.* **2020**, *12*, 236–241.
- [54] R. Krishnan, J. S. Binkley, R. Seeger, J. A. Pople, *J. Chem. Phys.* **1980**, *72*, 650–654.
- [55] K. Ruedenberg, *Rev. Mod. Phys.* **1962**, *34*, 326–376.
- [56] J. Kruszewski, T. M. Krygowski, *Tetrahedron Lett.* **1972**, *13*, 3839–3842.
- [57] E. Matito, M. Solà, M. Duran, P. Salvador, *J. Phys. Chem. A* **2006**, *110*, 5108–5113.
- [58] M. Giambiagi, M. S. de Giambiagi, C. D. dos Santos Silva, A. P. de Figueiredo, *Phys. Chem. Chem. Phys.* **2000**, *2*, 3381–3392.
- [59] R. Ponec, P. Bultinck, A. G. Saliner, *J. Phys. Chem. A* **2005**, *109*, 6606.
- [60] J. O. C. Jiménez-Halla, E. Matito, L. Blancafort, J. Robles, M. Solà, *J. Comput. Chem.* **2009**, *30*, 2764–2776.

## Electronic Supplementary Information

Complete optimized geometries (in Å) of the studied six-porphyrin nanoring in four different oxidation states using B3LYP, CAM-B3LYP, and M06-2X density functional approximations in combination with 6-31G\* basis set and Grimme's D3 dispersion correction. First the naked belt geometries (c-P6) for all the species are given and then the structure including the phenyl substituents and the encapsulated template (c-P6·T6) are provided.

|                                                      |     |
|------------------------------------------------------|-----|
| c-P6 optimized with B3LYP.....                       | 2   |
| c-P6 optimized with CAM-B3LYP.....                   | 6   |
| c-P6 optimized with M06-2X.....                      | 10  |
| c-P6 <sup>+4</sup> optimized with B3LYP.....         | 14  |
| c-P6 <sup>+4</sup> optimized with CAM-B3LYP.....     | 18  |
| c-P6 <sup>+4</sup> optimized with M06-2X.....        | 22  |
| c-P6 <sup>+6</sup> optimized with B3LYP.....         | 26  |
| c-P6 <sup>+6</sup> optimized with CAM-B3LYP.....     | 30  |
| c-P6 <sup>+6</sup> optimized with M06-2X.....        | 34  |
| c-P6 <sup>+12</sup> optimized with B3LYP.....        | 38  |
| c-P6 <sup>+12</sup> optimized with CAM-B3LYP.....    | 42  |
| c-P6 <sup>+12</sup> optimized with M06-2X.....       | 46  |
|                                                      |     |
| c-P6·T6 optimized with B3LYP.....                    | 50  |
| c-P6·T6 optimized with CAM-B3LYP.....                | 58  |
| c-P6·T6 optimized with M06-2X.....                   | 66  |
| c-P6·T6 <sup>+4</sup> optimized with B3LYP.....      | 75  |
| c-P6·T6 <sup>+4</sup> optimized with CAM-B3LYP.....  | 83  |
| c-P6·T6 <sup>+4</sup> optimized with M06-2X.....     | 91  |
| c-P6·T6 <sup>+6</sup> optimized with B3LYP.....      | 99  |
| c-P6·T6 <sup>+6</sup> optimized with CAM-B3LYP.....  | 107 |
| c-P6·T6 <sup>+6</sup> optimized with M06-2X.....     | 116 |
| c-P6·T6 <sup>+12</sup> optimized with B3LYP.....     | 124 |
| c-P6·T6 <sup>+12</sup> optimized with CAM-B3LYP..... | 132 |
| c-P6·T6 <sup>+12</sup> optimized with M06-2X.....    | 140 |

**c-P6** optimized with **B3LYP** - E=-17512.514222au

|    |               |              |              |
|----|---------------|--------------|--------------|
| 6  | 2.801091000   | 12.637718000 | 1.255794000  |
| 6  | 3.472767000   | 12.630050000 | 2.532637000  |
| 6  | 2.509228000   | 12.796715000 | 3.484168000  |
| 6  | 1.247039000   | 12.876952000 | 2.792695000  |
| 7  | 1.453240000   | 12.794160000 | 1.432644000  |
| 1  | 4.539710000   | 12.518769000 | 2.667097000  |
| 1  | 2.632035000   | 12.844162000 | 4.558805000  |
| 6  | 0.000000000   | 12.944539000 | 3.411291000  |
| 6  | -1.247039000  | 12.876952000 | 2.792695000  |
| 6  | -2.509228000  | 12.796715000 | 3.484168000  |
| 7  | -1.453240000  | 12.794160000 | 1.432644000  |
| 6  | -3.472767000  | 12.630050000 | 2.532637000  |
| 1  | -2.632035000  | 12.844162000 | 4.558805000  |
| 6  | -2.801091000  | 12.637718000 | 1.255794000  |
| 1  | -4.539710000  | 12.518769000 | 2.667097000  |
| 6  | -3.445762000  | 12.500980000 | 0.000000000  |
| 6  | -2.801091000  | 12.637718000 | -1.255794000 |
| 6  | -3.472767000  | 12.630050000 | -2.532637000 |
| 7  | -1.453240000  | 12.794160000 | -1.432644000 |
| 6  | -2.509228000  | 12.796715000 | -3.484168000 |
| 1  | -4.539710000  | 12.518769000 | -2.667097000 |
| 6  | -1.247039000  | 12.876952000 | -2.792695000 |
| 1  | -2.632035000  | 12.844162000 | -4.558805000 |
| 6  | 0.000000000   | 12.944539000 | -3.411291000 |
| 6  | 1.247039000   | 12.876952000 | -2.792695000 |
| 6  | 2.509228000   | 12.796715000 | -3.484168000 |
| 7  | 1.453240000   | 12.794160000 | -1.432644000 |
| 6  | 3.472767000   | 12.630050000 | -2.532637000 |
| 1  | 2.632035000   | 12.844162000 | -4.558805000 |
| 6  | 2.801091000   | 12.637718000 | -1.255794000 |
| 1  | 4.539710000   | 12.518769000 | -2.667097000 |
| 6  | 3.445762000   | 12.500980000 | 0.000000000  |
| 30 | 0.000000000   | 12.806163000 | 0.000000000  |
| 6  | 4.805670000   | 12.115938000 | 0.000000000  |
| 6  | 5.923490000   | 11.613190000 | 0.000000000  |
| 6  | -4.805670000  | 12.115938000 | 0.000000000  |
| 6  | -5.923490000  | 11.613190000 | 0.000000000  |
| 6  | -11.210300000 | 6.472269000  | -3.411291000 |
| 6  | -11.775287000 | 5.358508000  | -2.792695000 |
| 6  | -10.528248000 | 7.518443000  | -2.792695000 |
| 6  | -12.336894000 | 4.225302000  | -3.484168000 |
| 7  | -11.806688000 | 5.138537000  | -1.432644000 |
| 6  | -9.827666000  | 8.571412000  | -3.484168000 |
| 7  | -10.353448000 | 7.655623000  | -1.432644000 |
| 6  | -12.674327000 | 3.307521000  | -2.532637000 |
| 1  | -12.439388000 | 4.142671000  | -4.558805000 |
| 6  | -12.345130000 | 3.893044000  | -1.255794000 |
| 30 | -11.090462000 | 6.403081000  | 0.000000000  |
| 6  | -9.201561000  | 9.322529000  | -2.532637000 |
| 1  | -9.807353000  | 8.701490000  | -4.558805000 |
| 6  | -9.544040000  | 8.744675000  | -1.255794000 |
| 1  | -13.111427000 | 2.327880000  | -2.667097000 |
| 6  | -12.549048000 | 3.266373000  | 0.000000000  |
| 7  | -10.353448000 | 7.655623000  | 1.432644000  |
| 7  | -11.806688000 | 5.138537000  | 1.432644000  |
| 1  | -8.571717000  | 10.190889000 | -2.667097000 |
| 6  | -9.103285000  | 9.234608000  | 0.000000000  |

|    |               |               |              |
|----|---------------|---------------|--------------|
| 6  | -12.345130000 | 3.893044000   | 1.255794000  |
| 6  | -12.895545000 | 1.896136000   | 0.000000000  |
| 6  | -9.544040000  | 8.744675000   | 1.255794000  |
| 6  | -10.528248000 | 7.518443000   | 2.792695000  |
| 6  | -11.775287000 | 5.358508000   | 2.792695000  |
| 6  | -8.089875000  | 10.219801000  | 0.000000000  |
| 6  | -12.674327000 | 3.307521000   | 2.532637000  |
| 6  | -13.019063000 | 0.676702000   | 0.000000000  |
| 6  | -9.201561000  | 9.322529000   | 2.532637000  |
| 6  | -9.827666000  | 8.571412000   | 3.484168000  |
| 6  | -11.210300000 | 6.472269000   | 3.411291000  |
| 6  | -12.336894000 | 4.225302000   | 3.484168000  |
| 6  | -7.095573000  | 10.936488000  | 0.000000000  |
| 1  | -13.111427000 | 2.327880000   | 2.667097000  |
| 1  | -8.571717000  | 10.190889000  | 2.667097000  |
| 1  | -9.807353000  | 8.701490000   | 4.558805000  |
| 1  | -12.439388000 | 4.142671000   | 4.558805000  |
| 6  | -7.095573000  | -10.936488000 | 0.000000000  |
| 6  | -5.923490000  | -11.613190000 | 0.000000000  |
| 6  | -8.089875000  | -10.219801000 | 0.000000000  |
| 6  | -4.805670000  | -12.115938000 | 0.000000000  |
| 6  | -9.103285000  | -9.234608000  | 0.000000000  |
| 6  | -3.445762000  | -12.500980000 | 0.000000000  |
| 6  | -9.544040000  | -8.744675000  | -1.255794000 |
| 6  | -9.544040000  | -8.744675000  | 1.255794000  |
| 6  | -2.801091000  | -12.637718000 | -1.255794000 |
| 6  | -2.801091000  | -12.637718000 | 1.255794000  |
| 6  | -9.201561000  | -9.322529000  | -2.532637000 |
| 7  | -10.353448000 | -7.655623000  | -1.432644000 |
| 6  | -9.201561000  | -9.322529000  | 2.532637000  |
| 7  | -10.353448000 | -7.655623000  | 1.432644000  |
| 7  | -1.453240000  | -12.794160000 | -1.432644000 |
| 6  | -3.472767000  | -12.630050000 | -2.532637000 |
| 7  | -1.453240000  | -12.794160000 | 1.432644000  |
| 6  | -3.472767000  | -12.630050000 | 2.532637000  |
| 6  | -9.827666000  | -8.571412000  | -3.484168000 |
| 1  | -8.571717000  | -10.190889000 | -2.667097000 |
| 6  | -10.528248000 | -7.518443000  | -2.792695000 |
| 30 | -11.090462000 | -6.403081000  | 0.000000000  |
| 6  | -9.827666000  | -8.571412000  | 3.484168000  |
| 1  | -8.571717000  | -10.190889000 | 2.667097000  |
| 6  | -10.528248000 | -7.518443000  | 2.792695000  |
| 6  | -1.247039000  | -12.876952000 | -2.792695000 |
| 30 | 0.000000000   | -12.806163000 | 0.000000000  |
| 6  | -2.509228000  | -12.796715000 | -3.484168000 |
| 1  | -4.539710000  | -12.518769000 | -2.667097000 |
| 6  | -1.247039000  | -12.876952000 | 2.792695000  |
| 6  | -2.509228000  | -12.796715000 | 3.484168000  |
| 1  | -4.539710000  | -12.518769000 | 2.667097000  |
| 1  | -9.807353000  | -8.701490000  | -4.558805000 |
| 6  | -11.210300000 | -6.472269000  | -3.411291000 |
| 7  | -11.806688000 | -5.138537000  | -1.432644000 |
| 7  | -11.806688000 | -5.138537000  | 1.432644000  |
| 1  | -9.807353000  | -8.701490000  | 4.558805000  |
| 6  | -11.210300000 | -6.472269000  | 3.411291000  |
| 6  | 0.000000000   | -12.944539000 | -3.411291000 |
| 7  | 1.453240000   | -12.794160000 | -1.432644000 |
| 7  | 1.453240000   | -12.794160000 | 1.432644000  |
| 1  | -2.632035000  | -12.844162000 | -4.558805000 |



|    |              |              |             |
|----|--------------|--------------|-------------|
| 6  | 0.00000000   | -12.94453900 | 3.41129100  |
| 1  | -2.63203500  | -12.84416200 | 4.55880500  |
| 6  | -11.77528700 | -5.35850800  | -2.79269500 |
| 6  | -12.34513000 | -3.89304400  | -1.25579400 |
| 6  | -11.77528700 | -5.35850800  | 2.79269500  |
| 6  | -12.34513000 | -3.89304400  | 1.25579400  |
| 6  | 1.24703900   | -12.87695200 | -2.79269500 |
| 6  | 2.80109100   | -12.63771800 | -1.25579400 |
| 6  | 2.80109100   | -12.63771800 | 1.25579400  |
| 6  | 1.24703900   | -12.87695200 | 2.79269500  |
| 6  | -12.33689400 | -4.22530200  | -3.48416800 |
| 6  | -12.67432700 | -3.30752100  | -2.53263700 |
| 6  | -12.54904800 | -3.26637300  | 0.00000000  |
| 6  | -12.33689400 | -4.22530200  | 3.48416800  |
| 6  | -12.67432700 | -3.30752100  | 2.53263700  |
| 6  | 2.50922800   | -12.79671500 | -3.48416800 |
| 6  | 3.47276700   | -12.63005000 | -2.53263700 |
| 6  | 3.44576200   | -12.50098000 | 0.00000000  |
| 6  | 3.47276700   | -12.63005000 | 2.53263700  |
| 6  | 2.50922800   | -12.79671500 | 3.48416800  |
| 1  | -12.43938800 | -4.14267100  | -4.55880500 |
| 1  | -13.11142700 | -2.32788000  | -2.66709700 |
| 6  | -12.89554500 | -1.89613600  | 0.00000000  |
| 1  | -12.43938800 | -4.14267100  | 4.55880500  |
| 1  | -13.11142700 | -2.32788000  | 2.66709700  |
| 1  | 2.63203500   | -12.84416200 | -4.55880500 |
| 1  | 4.53971000   | -12.51876900 | -2.66709700 |
| 6  | 4.80567000   | -12.11593800 | 0.00000000  |
| 1  | 4.53971000   | -12.51876900 | 2.66709700  |
| 1  | 2.63203500   | -12.84416200 | 4.55880500  |
| 6  | -13.01906300 | -0.67670200  | 0.00000000  |
| 6  | 5.92349000   | -11.61319000 | 0.00000000  |
| 6  | 7.09557300   | -10.93648800 | 0.00000000  |
| 6  | 8.08987500   | -10.21980100 | 0.00000000  |
| 6  | 9.10328500   | -9.23460800  | 0.00000000  |
| 6  | 9.54404000   | -8.74467500  | 1.25579400  |
| 6  | 9.54404000   | -8.74467500  | -1.25579400 |
| 6  | 9.20156100   | -9.32252900  | 2.53263700  |
| 7  | 10.35344800  | -7.65562300  | 1.43264400  |
| 7  | 10.35344800  | -7.65562300  | -1.43264400 |
| 6  | 9.20156100   | -9.32252900  | -2.53263700 |
| 6  | 9.82766600   | -8.57141200  | 3.48416800  |
| 1  | 8.57171700   | -10.19088900 | 2.66709700  |
| 6  | 10.52824800  | -7.51844300  | 2.79269500  |
| 30 | 11.09046200  | -6.40308100  | 0.00000000  |
| 6  | 10.52824800  | -7.51844300  | -2.79269500 |
| 6  | 9.82766600   | -8.57141200  | -3.48416800 |
| 1  | 8.57171700   | -10.19088900 | -2.66709700 |
| 1  | 9.80735300   | -8.70149000  | 4.55880500  |
| 6  | 11.21030000  | -6.47226900  | 3.41129100  |
| 7  | 11.80668800  | -5.13853700  | 1.43264400  |
| 7  | 11.80668800  | -5.13853700  | -1.43264400 |
| 6  | 11.21030000  | -6.47226900  | -3.41129100 |
| 1  | 9.80735300   | -8.70149000  | -4.55880500 |
| 6  | 11.77528700  | -5.35850800  | 2.79269500  |
| 6  | 12.34513000  | -3.89304400  | 1.25579400  |
| 6  | 12.34513000  | -3.89304400  | -1.25579400 |
| 6  | 11.77528700  | -5.35850800  | -2.79269500 |
| 6  | 12.33689400  | -4.22530200  | 3.48416800  |

|    |               |               |              |
|----|---------------|---------------|--------------|
| 6  | 12.674327000  | -3.307521000  | 2.532637000  |
| 6  | 12.549048000  | -3.266373000  | 0.000000000  |
| 6  | 12.674327000  | -3.307521000  | -2.532637000 |
| 6  | 12.336894000  | -4.225302000  | -3.484168000 |
| 1  | 12.439388000  | -4.142671000  | 4.558805000  |
| 1  | 13.111427000  | -2.327880000  | 2.667097000  |
| 6  | 12.895545000  | -1.896136000  | 0.000000000  |
| 1  | 13.111427000  | -2.327880000  | -2.667097000 |
| 1  | 12.439388000  | -4.142671000  | -4.558805000 |
| 6  | 13.019063000  | -0.676702000  | 0.000000000  |
| 6  | 13.019063000  | 0.676702000   | 0.000000000  |
| 6  | 12.895545000  | 1.896136000   | 0.000000000  |
| 6  | 12.549048000  | 3.266373000   | 0.000000000  |
| 6  | 12.345130000  | 3.893044000   | 1.255794000  |
| 6  | 12.345130000  | 3.893044000   | -1.255794000 |
| 6  | 12.674327000  | 3.307521000   | 2.532637000  |
| 7  | 11.806688000  | 5.138537000   | 1.432644000  |
| 7  | 11.806688000  | 5.138537000   | -1.432644000 |
| 6  | 12.674327000  | 3.307521000   | -2.532637000 |
| 6  | 12.336894000  | 4.225302000   | 3.484168000  |
| 1  | 13.111427000  | 2.327880000   | 2.667097000  |
| 6  | 11.775287000  | 5.358508000   | 2.792695000  |
| 30 | 11.090462000  | 6.403081000   | 0.000000000  |
| 6  | 11.775287000  | 5.358508000   | -2.792695000 |
| 6  | 12.336894000  | 4.225302000   | -3.484168000 |
| 1  | 13.111427000  | 2.327880000   | -2.667097000 |
| 1  | 12.439388000  | 4.142671000   | 4.558805000  |
| 6  | 11.210300000  | 6.472269000   | 3.411291000  |
| 7  | 10.353448000  | 7.655623000   | 1.432644000  |
| 7  | 10.353448000  | 7.655623000   | -1.432644000 |
| 6  | 11.210300000  | 6.472269000   | -3.411291000 |
| 1  | 12.439388000  | 4.142671000   | -4.558805000 |
| 6  | 10.528248000  | 7.518443000   | 2.792695000  |
| 6  | 9.544040000   | 8.744675000   | 1.255794000  |
| 6  | 9.544040000   | 8.744675000   | -1.255794000 |
| 6  | 10.528248000  | 7.518443000   | -2.792695000 |
| 6  | 9.827666000   | 8.571412000   | 3.484168000  |
| 6  | 9.201561000   | 9.322529000   | 2.532637000  |
| 6  | 9.103285000   | 9.234608000   | 0.000000000  |
| 6  | 9.201561000   | 9.322529000   | -2.532637000 |
| 6  | 9.827666000   | 8.571412000   | -3.484168000 |
| 1  | 9.807353000   | 8.701490000   | 4.558805000  |
| 1  | 8.571717000   | 10.190889000  | 2.667097000  |
| 6  | 8.089875000   | 10.219801000  | 0.000000000  |
| 1  | 8.571717000   | 10.190889000  | -2.667097000 |
| 1  | 9.807353000   | 8.701490000   | -4.558805000 |
| 6  | 7.095573000   | 10.936488000  | 0.000000000  |
| 1  | -11.254926000 | 6.498034000   | -4.496488000 |
| 1  | -11.254926000 | -6.498034000  | -4.496488000 |
| 1  | 0.000000000   | -12.996069000 | -4.496488000 |
| 1  | 11.254926000  | -6.498034000  | -4.496488000 |
| 1  | 11.254926000  | 6.498034000   | -4.496488000 |
| 1  | 0.000000000   | 12.996069000  | -4.496488000 |
| 1  | 11.254926000  | -6.498034000  | 4.496488000  |
| 1  | 0.000000000   | -12.996069000 | 4.496488000  |
| 1  | -11.254926000 | -6.498034000  | 4.496488000  |
| 1  | -11.254926000 | 6.498034000   | 4.496488000  |
| 1  | 0.000000000   | 12.996069000  | 4.496488000  |
| 1  | 11.254926000  | 6.498034000   | 4.496488000  |

**c-P6** optimized with **CAM-B3LYP** - E=-17509.042830au

|    |               |              |              |
|----|---------------|--------------|--------------|
| 6  | 2.784061000   | 12.591836000 | 1.246438000  |
| 6  | 3.455843000   | 12.576991000 | 2.520012000  |
| 6  | 2.499013000   | 12.743582000 | 3.466808000  |
| 6  | 1.239430000   | 12.829653000 | 2.777056000  |
| 7  | 1.442860000   | 12.751104000 | 1.424728000  |
| 1  | 4.521799000   | 12.460698000 | 2.651712000  |
| 1  | 2.620756000   | 12.787125000 | 4.540864000  |
| 6  | 0.000000000   | 12.896316000 | 3.397172000  |
| 6  | -1.239430000  | 12.829653000 | 2.777056000  |
| 6  | -2.499013000  | 12.743582000 | 3.466808000  |
| 7  | -1.442860000  | 12.751104000 | 1.424728000  |
| 6  | -3.455843000  | 12.576991000 | 2.520012000  |
| 1  | -2.620756000  | 12.787125000 | 4.540864000  |
| 6  | -2.784061000  | 12.591836000 | 1.246438000  |
| 1  | -4.521799000  | 12.460698000 | 2.651712000  |
| 6  | -3.423966000  | 12.462500000 | 0.000000000  |
| 6  | -2.784061000  | 12.591836000 | -1.246438000 |
| 6  | -3.455843000  | 12.576991000 | -2.520012000 |
| 7  | -1.442860000  | 12.751104000 | -1.424728000 |
| 6  | -2.499013000  | 12.743582000 | -3.466808000 |
| 1  | -4.521799000  | 12.460698000 | -2.651712000 |
| 6  | -1.239430000  | 12.829653000 | -2.777056000 |
| 1  | -2.620756000  | 12.787125000 | -4.540864000 |
| 6  | 0.000000000   | 12.896316000 | -3.397172000 |
| 6  | 1.239430000   | 12.829653000 | -2.777056000 |
| 6  | 2.499013000   | 12.743582000 | -3.466808000 |
| 7  | 1.442860000   | 12.751104000 | -1.424728000 |
| 6  | 3.455843000   | 12.576991000 | -2.520012000 |
| 1  | 2.620756000   | 12.787125000 | -4.540864000 |
| 6  | 2.784061000   | 12.591836000 | -1.246438000 |
| 1  | 4.521799000   | 12.460698000 | -2.651712000 |
| 6  | 3.423966000   | 12.462500000 | 0.000000000  |
| 30 | 0.000000000   | 12.769438000 | 0.000000000  |
| 6  | 4.792629000   | 12.080850000 | 0.000000000  |
| 6  | 5.903982000   | 11.590924000 | 0.000000000  |
| 6  | -4.792629000  | 12.080850000 | 0.000000000  |
| 6  | -5.903982000  | 11.590924000 | 0.000000000  |
| 6  | -11.168537000 | 6.448158000  | -3.397172000 |
| 6  | -11.730520000 | 5.341449000  | -2.777056000 |
| 6  | -10.491090000 | 7.488204000  | -2.777056000 |
| 6  | -12.285772000 | 4.207583000  | -3.466808000 |
| 7  | -11.764210000 | 5.125999000  | -1.424728000 |
| 6  | -9.786760000  | 8.536000000  | -3.466808000 |
| 7  | -10.321350000 | 7.625105000  | -1.424728000 |
| 6  | -12.619915000 | 3.295648000  | -2.520012000 |
| 1  | -12.384353000 | 4.123922000  | -4.540864000 |
| 6  | -12.296881000 | 3.884850000  | -1.246438000 |
| 30 | -11.058658000 | 6.384719000  | 0.000000000  |
| 6  | -9.164072000  | 9.281343000  | -2.520012000 |
| 1  | -9.763597000  | 8.663203000  | -4.540864000 |
| 6  | -9.512820000  | 8.706986000  | -1.246438000 |
| 1  | -13.052181000 | 2.314356000  | -2.651712000 |
| 6  | -12.504824000 | 3.266009000  | 0.000000000  |
| 7  | -10.321350000 | 7.625105000  | 1.424728000  |
| 7  | -11.764210000 | 5.125999000  | 1.424728000  |

|    |               |               |              |
|----|---------------|---------------|--------------|
| 1  | -8.530382000  | 10.146342000  | -2.651712000 |
| 6  | -9.080858000  | 9.196491000   | 0.000000000  |
| 6  | -12.296881000 | 3.884850000   | 1.246438000  |
| 6  | -12.858638000 | 1.889887000   | 0.000000000  |
| 6  | -9.512820000  | 8.706986000   | 1.246438000  |
| 6  | -10.491090000 | 7.488204000   | 2.777056000  |
| 6  | -11.730520000 | 5.341449000   | 2.777056000  |
| 6  | -8.066009000  | 10.190964000  | 0.000000000  |
| 6  | -12.619915000 | 3.295648000   | 2.520012000  |
| 6  | -12.990025000 | 0.682464000   | 0.000000000  |
| 6  | -9.164072000  | 9.281343000   | 2.520012000  |
| 6  | -9.786760000  | 8.536000000   | 3.466808000  |
| 6  | -11.168537000 | 6.448158000   | 3.397172000  |
| 6  | -12.285772000 | 4.207583000   | 3.466808000  |
| 6  | -7.086043000  | 10.908460000  | 0.000000000  |
| 1  | -13.052181000 | 2.314356000   | 2.651712000  |
| 1  | -8.530382000  | 10.146342000  | 2.651712000  |
| 1  | -9.763597000  | 8.663203000   | 4.540864000  |
| 1  | -12.384533000 | 4.123922000   | 4.540864000  |
| 6  | -7.086043000  | -10.908460000 | 0.000000000  |
| 6  | -5.903982000  | -11.590924000 | 0.000000000  |
| 6  | -8.066009000  | -10.190964000 | 0.000000000  |
| 6  | -4.792629000  | -12.080850000 | 0.000000000  |
| 6  | -9.080858000  | -9.196491000  | 0.000000000  |
| 6  | -3.423966000  | -12.462500000 | 0.000000000  |
| 6  | -9.512820000  | -8.706986000  | -1.246438000 |
| 6  | -9.512820000  | -8.706986000  | 1.246438000  |
| 6  | -2.784061000  | -12.591836000 | -1.246438000 |
| 6  | -2.784061000  | -12.591836000 | 1.246438000  |
| 6  | -9.164072000  | -9.281343000  | -2.520012000 |
| 7  | -10.321350000 | -7.625105000  | -1.424728000 |
| 6  | -9.164072000  | -9.281343000  | 2.520012000  |
| 7  | -10.321350000 | -7.625105000  | 1.424728000  |
| 7  | -1.442860000  | -12.751104000 | -1.424728000 |
| 6  | -3.455843000  | -12.576991000 | -2.520012000 |
| 7  | -1.442860000  | -12.751104000 | 1.424728000  |
| 6  | -3.455843000  | -12.576991000 | 2.520012000  |
| 6  | -9.786760000  | -8.536000000  | -3.466808000 |
| 1  | -8.530382000  | -10.146342000 | -2.651712000 |
| 6  | -10.491090000 | -7.488204000  | -2.777056000 |
| 30 | -11.058658000 | -6.384719000  | 0.000000000  |
| 6  | -9.786760000  | -8.536000000  | 3.466808000  |
| 1  | -8.530382000  | -10.146342000 | 2.651712000  |
| 6  | -10.491090000 | -7.488204000  | 2.777056000  |
| 6  | -1.239430000  | -12.829653000 | -2.777056000 |
| 30 | 0.000000000   | -12.769438000 | 0.000000000  |
| 6  | -2.499013000  | -12.743582000 | -3.466808000 |
| 1  | -4.521799000  | -12.460698000 | -2.651712000 |
| 6  | -1.239430000  | -12.829653000 | 2.777056000  |
| 6  | -2.499013000  | -12.743582000 | 3.466808000  |
| 1  | -4.521799000  | -12.460698000 | 2.651712000  |
| 1  | -9.763597000  | -8.663203000  | -4.540864000 |
| 6  | -11.168537000 | -6.448158000  | -3.397172000 |
| 7  | -11.764210000 | -5.125999000  | -1.424728000 |
| 7  | -11.764210000 | -5.125999000  | 1.424728000  |
| 1  | -9.763597000  | -8.663203000  | 4.540864000  |
| 6  | -11.168537000 | -6.448158000  | 3.397172000  |
| 6  | 0.000000000   | -12.896316000 | -3.397172000 |
| 7  | 1.442860000   | -12.751104000 | -1.424728000 |

|    |               |               |              |
|----|---------------|---------------|--------------|
| 7  | 1.442860000   | -12.751104000 | 1.424728000  |
| 1  | -2.620756000  | -12.787125000 | -4.540864000 |
| 6  | 0.000000000   | -12.896316000 | 3.397172000  |
| 1  | -2.620756000  | -12.787125000 | 4.540864000  |
| 6  | -11.730520000 | -5.341449000  | -2.777056000 |
| 6  | -12.296881000 | -3.884850000  | -1.246438000 |
| 6  | -11.730520000 | -5.341449000  | 2.777056000  |
| 6  | -12.296881000 | -3.884850000  | 1.246438000  |
| 6  | 1.239430000   | -12.829653000 | -2.777056000 |
| 6  | 2.784061000   | -12.591836000 | -1.246438000 |
| 6  | 2.784061000   | -12.591836000 | 1.246438000  |
| 6  | 1.239430000   | -12.829653000 | 2.777056000  |
| 6  | -12.285772000 | -4.207583000  | -3.466808000 |
| 6  | -12.619915000 | -3.295648000  | -2.520012000 |
| 6  | -12.504824000 | -3.266009000  | 0.000000000  |
| 6  | -12.285772000 | -4.207583000  | 3.466808000  |
| 6  | -12.619915000 | -3.295648000  | 2.520012000  |
| 6  | 2.499013000   | -12.743582000 | -3.466808000 |
| 6  | 3.455843000   | -12.576991000 | -2.520012000 |
| 6  | 3.423966000   | -12.462500000 | 0.000000000  |
| 6  | 3.455843000   | -12.576991000 | 2.520012000  |
| 6  | 2.499013000   | -12.743582000 | 3.466808000  |
| 1  | -12.384353000 | -4.123922000  | -4.540864000 |
| 1  | -13.052181000 | -2.314356000  | -2.651712000 |
| 6  | -12.858638000 | -1.889887000  | 0.000000000  |
| 1  | -12.384353000 | -4.123922000  | 4.540864000  |
| 1  | -13.052181000 | -2.314356000  | 2.651712000  |
| 1  | 2.620756000   | -12.787125000 | -4.540864000 |
| 1  | 4.521799000   | -12.460698000 | -2.651712000 |
| 6  | 4.792629000   | -12.080850000 | 0.000000000  |
| 1  | 4.521799000   | -12.460698000 | 2.651712000  |
| 1  | 2.620756000   | -12.787125000 | 4.540864000  |
| 6  | -12.990025000 | -0.682464000  | 0.000000000  |
| 6  | 5.903982000   | -11.590924000 | 0.000000000  |
| 6  | 7.086043000   | -10.908460000 | 0.000000000  |
| 6  | 8.066009000   | -10.190964000 | 0.000000000  |
| 6  | 9.080858000   | -9.196491000  | 0.000000000  |
| 6  | 9.512820000   | -8.706986000  | 1.246438000  |
| 6  | 9.512820000   | -8.706986000  | -1.246438000 |
| 6  | 9.164072000   | -9.281343000  | 2.520012000  |
| 7  | 10.321350000  | -7.625105000  | 1.424728000  |
| 7  | 10.321350000  | -7.625105000  | -1.424728000 |
| 6  | 9.164072000   | -9.281343000  | -2.520012000 |
| 6  | 9.786760000   | -8.536000000  | 3.466808000  |
| 1  | 8.530382000   | -10.146342000 | 2.651712000  |
| 6  | 10.491090000  | -7.488204000  | 2.777056000  |
| 30 | 11.058658000  | -6.384719000  | 0.000000000  |
| 6  | 10.491090000  | -7.488204000  | -2.777056000 |
| 6  | 9.786760000   | -8.536000000  | -3.466808000 |
| 1  | 8.530382000   | -10.146342000 | -2.651712000 |
| 1  | 9.763597000   | -8.663203000  | 4.540864000  |
| 6  | 11.168537000  | -6.448158000  | 3.397172000  |
| 7  | 11.764210000  | -5.125999000  | 1.424728000  |
| 7  | 11.764210000  | -5.125999000  | -1.424728000 |
| 6  | 11.168537000  | -6.448158000  | -3.397172000 |
| 1  | 9.763597000   | -8.663203000  | -4.540864000 |
| 6  | 11.730520000  | -5.341449000  | 2.777056000  |
| 6  | 12.296881000  | -3.884850000  | 1.246438000  |
| 6  | 12.296881000  | -3.884850000  | -1.246438000 |

|    |               |               |              |
|----|---------------|---------------|--------------|
| 6  | 11.730520000  | -5.341449000  | -2.777056000 |
| 6  | 12.285772000  | -4.207583000  | 3.466808000  |
| 6  | 12.619915000  | -3.295648000  | 2.520012000  |
| 6  | 12.504824000  | -3.266009000  | 0.000000000  |
| 6  | 12.619915000  | -3.295648000  | -2.520012000 |
| 6  | 12.285772000  | -4.207583000  | -3.466808000 |
| 1  | 12.384353000  | -4.123922000  | 4.540864000  |
| 1  | 13.052181000  | -2.314356000  | 2.651712000  |
| 6  | 12.858638000  | -1.889887000  | 0.000000000  |
| 1  | 13.052181000  | -2.314356000  | -2.651712000 |
| 1  | 12.384353000  | -4.123922000  | -4.540864000 |
| 6  | 12.990025000  | -0.682464000  | 0.000000000  |
| 6  | 12.990025000  | 0.682464000   | 0.000000000  |
| 6  | 12.858638000  | 1.889887000   | 0.000000000  |
| 6  | 12.504824000  | 3.266009000   | 0.000000000  |
| 6  | 12.296881000  | 3.884850000   | 1.246438000  |
| 6  | 12.296881000  | 3.884850000   | -1.246438000 |
| 6  | 12.619915000  | 3.295648000   | 2.520012000  |
| 7  | 11.764210000  | 5.125999000   | 1.424728000  |
| 7  | 11.764210000  | 5.125999000   | -1.424728000 |
| 6  | 12.619915000  | 3.295648000   | -2.520012000 |
| 6  | 12.285772000  | 4.207583000   | 3.466808000  |
| 1  | 13.052181000  | 2.314356000   | 2.651712000  |
| 6  | 11.730520000  | 5.341449000   | 2.777056000  |
| 30 | 11.058658000  | 6.384719000   | 0.000000000  |
| 6  | 11.730520000  | 5.341449000   | -2.777056000 |
| 6  | 12.285772000  | 4.207583000   | -3.466808000 |
| 1  | 13.052181000  | 2.314356000   | -2.651712000 |
| 1  | 12.384353000  | 4.123922000   | 4.540864000  |
| 6  | 11.168537000  | 6.448158000   | 3.397172000  |
| 7  | 10.321350000  | 7.625105000   | 1.424728000  |
| 7  | 10.321350000  | 7.625105000   | -1.424728000 |
| 6  | 11.168537000  | 6.448158000   | -3.397172000 |
| 1  | 12.384353000  | 4.123922000   | -4.540864000 |
| 6  | 10.491090000  | 7.488204000   | 2.777056000  |
| 6  | 9.512820000   | 8.706986000   | 1.246438000  |
| 6  | 9.512820000   | 8.706986000   | -1.246438000 |
| 6  | 10.491090000  | 7.488204000   | -2.777056000 |
| 6  | 9.786760000   | 8.536000000   | 3.466808000  |
| 6  | 9.164072000   | 9.281343000   | 2.520012000  |
| 6  | 9.080858000   | 9.196491000   | 0.000000000  |
| 6  | 9.164072000   | 9.281343000   | -2.520012000 |
| 6  | 9.786760000   | 8.536000000   | -3.466808000 |
| 1  | 9.763597000   | 8.663203000   | 4.540864000  |
| 1  | 8.530382000   | 10.146342000  | 2.651712000  |
| 6  | 8.066009000   | 10.190964000  | 0.000000000  |
| 1  | 8.530382000   | 10.146342000  | -2.651712000 |
| 1  | 9.763597000   | 8.663203000   | -4.540864000 |
| 6  | 7.086043000   | 10.908460000  | 0.000000000  |
| 1  | -11.209852000 | 6.472011000   | -4.481464000 |
| 1  | -11.209852000 | -6.472011000  | -4.481464000 |
| 1  | 0.000000000   | -12.944022000 | -4.481464000 |
| 1  | 11.209852000  | -6.472011000  | -4.481464000 |
| 1  | 11.209852000  | 6.472011000   | -4.481464000 |
| 1  | 0.000000000   | 12.944022000  | -4.481464000 |
| 1  | 11.209852000  | -6.472011000  | 4.481464000  |
| 1  | 0.000000000   | -12.944022000 | 4.481464000  |
| 1  | -11.209852000 | -6.472011000  | 4.481464000  |
| 1  | -11.209852000 | 6.472011000   | 4.481464000  |

|   |              |              |             |
|---|--------------|--------------|-------------|
| 1 | 0.000000000  | 12.944022000 | 4.481464000 |
| 1 | 11.209852000 | 6.472011000  | 4.481464000 |

**c-P6** optimized with **M06-2X** E=-17509.271928au

|    |               |              |              |
|----|---------------|--------------|--------------|
| 6  | 2.791976000   | 12.612039000 | 1.252824000  |
| 6  | 3.467224000   | 12.584989000 | 2.528636000  |
| 6  | 2.507434000   | 12.735727000 | 3.478217000  |
| 6  | 1.245158000   | 12.826452000 | 2.785518000  |
| 7  | 1.452439000   | 12.765253000 | 1.434327000  |
| 1  | 4.534419000   | 12.471187000 | 2.657808000  |
| 1  | 2.627106000   | 12.766469000 | 4.553180000  |
| 6  | 0.000000000   | 12.883438000 | 3.405925000  |
| 6  | -1.245158000  | 12.826452000 | 2.785518000  |
| 6  | -2.507434000  | 12.735727000 | 3.478217000  |
| 7  | -1.452439000  | 12.765253000 | 1.434327000  |
| 6  | -3.467224000  | 12.584989000 | 2.528636000  |
| 1  | -2.627106000  | 12.766469000 | 4.553180000  |
| 6  | -2.791976000  | 12.612039000 | 1.252824000  |
| 1  | -4.534419000  | 12.471187000 | 2.657808000  |
| 6  | -3.431206000  | 12.489763000 | 0.000000000  |
| 6  | -2.791976000  | 12.612039000 | -1.252824000 |
| 6  | -3.467224000  | 12.584989000 | -2.528636000 |
| 7  | -1.452439000  | 12.765253000 | -1.434327000 |
| 6  | -2.507434000  | 12.735727000 | -3.478217000 |
| 1  | -4.534419000  | 12.471187000 | -2.657808000 |
| 6  | -1.245158000  | 12.826452000 | -2.785518000 |
| 1  | -2.627106000  | 12.766469000 | -4.553180000 |
| 6  | 0.000000000   | 12.883438000 | -3.405925000 |
| 6  | 1.245158000   | 12.826452000 | -2.785518000 |
| 6  | 2.507434000   | 12.735727000 | -3.478217000 |
| 7  | 1.452439000   | 12.765253000 | -1.434327000 |
| 6  | 3.467224000   | 12.584989000 | -2.528636000 |
| 1  | 2.627106000   | 12.766469000 | -4.553180000 |
| 6  | 2.791976000   | 12.612039000 | -1.252824000 |
| 1  | 4.534419000   | 12.471187000 | -2.657808000 |
| 6  | 3.431206000   | 12.489763000 | 0.000000000  |
| 30 | 0.000000000   | 12.792194000 | 0.000000000  |
| 6  | 4.802150000   | 12.108343000 | 0.000000000  |
| 6  | 5.917653000   | 11.618512000 | 0.000000000  |
| 6  | -4.802150000  | 12.108343000 | 0.000000000  |
| 6  | -5.917653000  | 11.618512000 | 0.000000000  |
| 6  | -11.157385000 | 6.441719000  | -3.405925000 |
| 6  | -11.730613000 | 5.334888000  | -2.785518000 |
| 6  | -10.485454000 | 7.491565000  | -2.785518000 |
| 6  | -12.283180000 | 4.196362000  | -3.478217000 |
| 7  | -11.781253000 | 5.124778000  | -1.434327000 |
| 6  | -9.775747000  | 8.539365000  | -3.478217000 |
| 7  | -10.328814000 | 7.640475000  | -1.434327000 |
| 6  | -12.632532000 | 3.289791000  | -2.528636000 |
| 1  | -12.369639000 | 4.108094000  | -4.553180000 |
| 6  | -12.318334000 | 3.888097000  | -1.252824000 |
| 30 | -11.078365000 | 6.396097000  | 0.000000000  |
| 6  | -9.165308000  | 9.295198000  | -2.528636000 |
| 1  | -9.742534000  | 8.658375000  | -4.553180000 |
| 6  | -9.526358000  | 8.723941000  | -1.252824000 |
| 1  | -13.067575000 | 2.308671000  | -2.657808000 |
| 6  | -12.532055000 | 3.273370000  | 0.000000000  |

|    |               |               |              |
|----|---------------|---------------|--------------|
| 7  | -10.328814000 | 7.640475000   | 1.434327000  |
| 7  | -11.781253000 | 5.124778000   | 1.434327000  |
| 1  | -8.533155000  | 10.162516000  | -2.657808000 |
| 6  | -9.100849000  | 9.216393000   | 0.000000000  |
| 6  | -12.318334000 | 3.888097000   | 1.252824000  |
| 6  | -12.887207000 | 1.895388000   | 0.000000000  |
| 6  | -9.526358000  | 8.723941000   | 1.252824000  |
| 6  | -10.485454000 | 7.491565000   | 2.785518000  |
| 6  | -11.730613000 | 5.334888000   | 2.785518000  |
| 6  | -8.085058000  | 10.212955000  | 0.000000000  |
| 6  | -12.632532000 | 3.289791000   | 2.528636000  |
| 6  | -13.020752000 | 0.684418000   | 0.000000000  |
| 6  | -9.165308000  | 9.295198000   | 2.528636000  |
| 6  | -9.775747000  | 8.539365000   | 3.478217000  |
| 6  | -11.157385000 | 6.441719000   | 3.405925000  |
| 6  | -12.283180000 | 4.196362000   | 3.478217000  |
| 6  | -7.103100000  | 10.934093000  | 0.000000000  |
| 1  | -13.067575000 | 2.308671000   | 2.657808000  |
| 1  | -8.533155000  | 10.162516000  | 2.657808000  |
| 1  | -9.742534000  | 8.658375000   | 4.553180000  |
| 1  | -12.369639000 | 4.108094000   | 4.553180000  |
| 6  | -7.103100000  | -10.934093000 | 0.000000000  |
| 6  | -5.917653000  | -11.618512000 | 0.000000000  |
| 6  | -8.085058000  | -10.212955000 | 0.000000000  |
| 6  | -4.802150000  | -12.108343000 | 0.000000000  |
| 6  | -9.100849000  | -9.216393000  | 0.000000000  |
| 6  | -3.431206000  | -12.489763000 | 0.000000000  |
| 6  | -9.526358000  | -8.723941000  | -1.252824000 |
| 6  | -9.526358000  | -8.723941000  | 1.252824000  |
| 6  | -2.791976000  | -12.612039000 | -1.252824000 |
| 6  | -2.791976000  | -12.612039000 | 1.252824000  |
| 6  | -9.165308000  | -9.295198000  | -2.528636000 |
| 7  | -10.328814000 | -7.640475000  | -1.434327000 |
| 6  | -9.165308000  | -9.295198000  | 2.528636000  |
| 7  | -10.328814000 | -7.640475000  | 1.434327000  |
| 7  | -1.452439000  | -12.765253000 | -1.434327000 |
| 6  | -3.467224000  | -12.584989000 | -2.528636000 |
| 7  | -1.452439000  | -12.765253000 | 1.434327000  |
| 6  | -3.467224000  | -12.584989000 | 2.528636000  |
| 6  | -9.775747000  | -8.539365000  | -3.478217000 |
| 1  | -8.533155000  | -10.162516000 | -2.657808000 |
| 6  | -10.485454000 | -7.491565000  | -2.785518000 |
| 30 | -11.078365000 | -6.396097000  | 0.000000000  |
| 6  | -9.775747000  | -8.539365000  | 3.478217000  |
| 1  | -8.533155000  | -10.162516000 | 2.657808000  |
| 6  | -10.485454000 | -7.491565000  | 2.785518000  |
| 6  | -1.245158000  | -12.826452000 | -2.785518000 |
| 30 | 0.000000000   | -12.792194000 | 0.000000000  |
| 6  | -2.507434000  | -12.735727000 | -3.478217000 |
| 1  | -4.534419000  | -12.471187000 | -2.657808000 |
| 6  | -1.245158000  | -12.826452000 | 2.785518000  |
| 6  | -2.507434000  | -12.735727000 | 3.478217000  |
| 1  | -4.534419000  | -12.471187000 | 2.657808000  |
| 1  | -9.742534000  | -8.658375000  | -4.553180000 |
| 6  | -11.157385000 | -6.441719000  | -3.405925000 |
| 7  | -11.781253000 | -5.124778000  | -1.434327000 |
| 7  | -11.781253000 | -5.124778000  | 1.434327000  |
| 1  | -9.742534000  | -8.658375000  | 4.553180000  |
| 6  | -11.157385000 | -6.441719000  | 3.405925000  |



|    |              |              |             |
|----|--------------|--------------|-------------|
| 6  | 0.00000000   | -12.88343800 | -3.40592500 |
| 7  | 1.45243900   | -12.76525300 | -1.43432700 |
| 7  | 1.45243900   | -12.76525300 | 1.43432700  |
| 1  | -2.62710600  | -12.76646900 | -4.55318000 |
| 6  | 0.00000000   | -12.88343800 | 3.40592500  |
| 1  | -2.62710600  | -12.76646900 | 4.55318000  |
| 6  | -11.73061300 | -5.33488800  | -2.78551800 |
| 6  | -12.31833400 | -3.88809700  | -1.25282400 |
| 6  | -11.73061300 | -5.33488800  | 2.78551800  |
| 6  | -12.31833400 | -3.88809700  | 1.25282400  |
| 6  | 1.24515800   | -12.82645200 | -2.78551800 |
| 6  | 2.79197600   | -12.61203900 | -1.25282400 |
| 6  | 2.79197600   | -12.61203900 | 1.25282400  |
| 6  | 1.24515800   | -12.82645200 | 2.78551800  |
| 6  | -12.28318000 | -4.19636200  | -3.47821700 |
| 6  | -12.63253200 | -3.28979100  | -2.52863600 |
| 6  | -12.53205500 | -3.27337000  | 0.00000000  |
| 6  | -12.28318000 | -4.19636200  | 3.47821700  |
| 6  | -12.63253200 | -3.28979100  | 2.52863600  |
| 6  | 2.50743400   | -12.73572700 | -3.47821700 |
| 6  | 3.46722400   | -12.58498900 | -2.52863600 |
| 6  | 3.43120600   | -12.48976300 | 0.00000000  |
| 6  | 3.46722400   | -12.58498900 | 2.52863600  |
| 6  | 2.50743400   | -12.73572700 | 3.47821700  |
| 1  | -12.36963900 | -4.10809400  | -4.55318000 |
| 1  | -13.06757500 | -2.30867100  | -2.65780800 |
| 6  | -12.88720700 | -1.89538800  | 0.00000000  |
| 1  | -12.36963900 | -4.10809400  | 4.55318000  |
| 1  | -13.06757500 | -2.30867100  | 2.65780800  |
| 1  | 2.62710600   | -12.76646900 | -4.55318000 |
| 1  | 4.53441900   | -12.47118700 | -2.65780800 |
| 6  | 4.80215000   | -12.10834300 | 0.00000000  |
| 1  | 4.53441900   | -12.47118700 | 2.65780800  |
| 1  | 2.62710600   | -12.76646900 | 4.55318000  |
| 6  | -13.02075200 | -0.68441800  | 0.00000000  |
| 6  | 5.91765300   | -11.61851200 | 0.00000000  |
| 6  | 7.10310000   | -10.93409300 | 0.00000000  |
| 6  | 8.08505800   | -10.21295500 | 0.00000000  |
| 6  | 9.10084900   | -9.21639300  | 0.00000000  |
| 6  | 9.52635800   | -8.72394100  | 1.25282400  |
| 6  | 9.52635800   | -8.72394100  | -1.25282400 |
| 6  | 9.16530800   | -9.29519800  | 2.52863600  |
| 7  | 10.32881400  | -7.64047500  | 1.43432700  |
| 7  | 10.32881400  | -7.64047500  | -1.43432700 |
| 6  | 9.16530800   | -9.29519800  | -2.52863600 |
| 6  | 9.77574700   | -8.53936500  | 3.47821700  |
| 1  | 8.53315500   | -10.16251600 | 2.65780800  |
| 6  | 10.48545400  | -7.49156500  | 2.78551800  |
| 30 | 11.07836500  | -6.39609700  | 0.00000000  |
| 6  | 10.48545400  | -7.49156500  | -2.78551800 |
| 6  | 9.77574700   | -8.53936500  | -3.47821700 |
| 1  | 8.53315500   | -10.16251600 | -2.65780800 |
| 1  | 9.74253400   | -8.65837500  | 4.55318000  |
| 6  | 11.15738500  | -6.44171900  | 3.40592500  |
| 7  | 11.78125300  | -5.12477800  | 1.43432700  |
| 7  | 11.78125300  | -5.12477800  | -1.43432700 |
| 6  | 11.15738500  | -6.44171900  | -3.40592500 |
| 1  | 9.74253400   | -8.65837500  | -4.55318000 |
| 6  | 11.73061300  | -5.33488800  | 2.78551800  |

|    |               |               |              |
|----|---------------|---------------|--------------|
| 6  | 12.318334000  | -3.888097000  | 1.252824000  |
| 6  | 12.318334000  | -3.888097000  | -1.252824000 |
| 6  | 11.730613000  | -5.334888000  | -2.785518000 |
| 6  | 12.283180000  | -4.196362000  | 3.478217000  |
| 6  | 12.632532000  | -3.289791000  | 2.528636000  |
| 6  | 12.532055000  | -3.273370000  | 0.000000000  |
| 6  | 12.632532000  | -3.289791000  | -2.528636000 |
| 6  | 12.283180000  | -4.196362000  | -3.478217000 |
| 1  | 12.369639000  | -4.108094000  | 4.553180000  |
| 1  | 13.067575000  | -2.308671000  | 2.657808000  |
| 6  | 12.887207000  | -1.895388000  | 0.000000000  |
| 1  | 13.067575000  | -2.308671000  | -2.657808000 |
| 1  | 12.369639000  | -4.108094000  | -4.553180000 |
| 6  | 13.020752000  | -0.684418000  | 0.000000000  |
| 6  | 13.020752000  | 0.684418000   | 0.000000000  |
| 6  | 12.887207000  | 1.895388000   | 0.000000000  |
| 6  | 12.532055000  | 3.273370000   | 0.000000000  |
| 6  | 12.318334000  | 3.888097000   | 1.252824000  |
| 6  | 12.318334000  | 3.888097000   | -1.252824000 |
| 6  | 12.632532000  | 3.289791000   | 2.528636000  |
| 7  | 11.781253000  | 5.124778000   | 1.434327000  |
| 7  | 11.781253000  | 5.124778000   | -1.434327000 |
| 6  | 12.632532000  | 3.289791000   | -2.528636000 |
| 6  | 12.283180000  | 4.196362000   | 3.478217000  |
| 1  | 13.067575000  | 2.308671000   | 2.657808000  |
| 6  | 11.730613000  | 5.334888000   | 2.785518000  |
| 30 | 11.078365000  | 6.396097000   | 0.000000000  |
| 6  | 11.730613000  | 5.334888000   | -2.785518000 |
| 6  | 12.283180000  | 4.196362000   | -3.478217000 |
| 1  | 13.067575000  | 2.308671000   | -2.657808000 |
| 1  | 12.369639000  | 4.108094000   | 4.553180000  |
| 6  | 11.157385000  | 6.441719000   | 3.405925000  |
| 7  | 10.328814000  | 7.640475000   | 1.434327000  |
| 7  | 10.328814000  | 7.640475000   | -1.434327000 |
| 6  | 11.157385000  | 6.441719000   | -3.405925000 |
| 1  | 12.369639000  | 4.108094000   | -4.553180000 |
| 6  | 10.485454000  | 7.491565000   | 2.785518000  |
| 6  | 9.526358000   | 8.723941000   | 1.252824000  |
| 6  | 9.526358000   | 8.723941000   | -1.252824000 |
| 6  | 10.485454000  | 7.491565000   | -2.785518000 |
| 6  | 9.775747000   | 8.539365000   | 3.478217000  |
| 6  | 9.165308000   | 9.295198000   | 2.528636000  |
| 6  | 9.100849000   | 9.216393000   | 0.000000000  |
| 6  | 9.165308000   | 9.295198000   | -2.528636000 |
| 6  | 9.775747000   | 8.539365000   | -3.478217000 |
| 1  | 9.742534000   | 8.658375000   | 4.553180000  |
| 1  | 8.533155000   | 10.162516000  | 2.657808000  |
| 6  | 8.085058000   | 10.212955000  | 0.000000000  |
| 1  | 8.533155000   | 10.162516000  | -2.657808000 |
| 1  | 9.742534000   | 8.658375000   | -4.553180000 |
| 6  | 7.103100000   | 10.934093000  | 0.000000000  |
| 1  | -11.185853000 | 6.458155000   | -4.491636000 |
| 1  | -11.185853000 | -6.458155000  | -4.491636000 |
| 1  | 0.000000000   | -12.916310000 | -4.491636000 |
| 1  | 11.185853000  | -6.458155000  | -4.491636000 |
| 1  | 11.185853000  | 6.458155000   | -4.491636000 |
| 1  | 0.000000000   | 12.916310000  | -4.491636000 |
| 1  | 11.185853000  | -6.458155000  | 4.491636000  |
| 1  | 0.000000000   | -12.916310000 | 4.491636000  |

|   |               |              |             |
|---|---------------|--------------|-------------|
| 1 | -11.185853000 | -6.458155000 | 4.491636000 |
| 1 | -11.185853000 | 6.458155000  | 4.491636000 |
| 1 | 0.000000000   | 12.916310000 | 4.491636000 |
| 1 | 11.185853000  | 6.458155000  | 4.491636000 |

**c-P6<sup>+</sup>** optimized with **B3LYP** - E=-17511.457194au

|    |               |               |              |
|----|---------------|---------------|--------------|
| 6  | -3.909087000  | -11.996515000 | -1.261444000 |
| 6  | -3.320660000  | -12.324612000 | -2.534691000 |
| 6  | -4.259111000  | -12.035256000 | -3.484657000 |
| 6  | -5.401553000  | -11.504916000 | -2.789046000 |
| 7  | -5.172699000  | -11.502652000 | -1.434060000 |
| 1  | -2.331736000  | -12.737787000 | -2.674494000 |
| 1  | -4.184221000  | -12.158973000 | -4.557087000 |
| 6  | -6.549954000  | -10.992734000 | -3.408222000 |
| 6  | -7.615540000  | -10.344248000 | -2.798532000 |
| 6  | -8.706538000  | -9.705392000  | -3.491387000 |
| 7  | -7.745076000  | -10.143429000 | -1.434829000 |
| 6  | -9.471127000  | -9.091751000  | -2.542631000 |
| 1  | -8.855895000  | -9.719383000  | -4.563143000 |
| 6  | -8.859588000  | -9.385910000  | -1.269446000 |
| 1  | -10.372912000 | -8.512131000  | -2.681145000 |
| 6  | -9.354125000  | -8.942731000  | -0.000053000 |
| 6  | -8.859572000  | -9.385910000  | 1.269334000  |
| 6  | -9.471096000  | -9.091753000  | 2.542527000  |
| 7  | -7.745058000  | -10.143430000 | 1.434703000  |
| 6  | -8.706495000  | -9.705396000  | 3.491273000  |
| 1  | -10.372879000 | -8.512133000  | 2.681053000  |
| 6  | -7.615505000  | -10.344251000 | 2.798404000  |
| 1  | -8.855839000  | -9.719387000  | 4.563031000  |
| 6  | -6.549912000  | -10.992739000 | 3.408080000  |
| 6  | -5.401519000  | -11.504920000 | 2.788889000  |
| 6  | -4.259069000  | -12.035262000 | 3.484485000  |
| 7  | -5.172682000  | -11.502654000 | 1.433900000  |
| 6  | -3.320630000  | -12.324616000 | 2.534507000  |
| 1  | -4.184166000  | -12.158980000 | 4.556914000  |
| 6  | -3.909072000  | -11.996517000 | 1.261267000  |
| 1  | -2.331704000  | -12.737792000 | 2.674298000  |
| 6  | -3.274807000  | -12.166249000 | -0.000092000 |
| 30 | -6.477545000  | -10.864833000 | -0.000071000 |
| 6  | -1.898426000  | -12.464335000 | -0.000102000 |
| 6  | -0.674982000  | -12.564071000 | -0.000100000 |
| 6  | -10.330827000 | -7.956418000  | -0.000046000 |
| 6  | -11.087943000 | -6.977188000  | -0.000038000 |
| 6  | -13.390795000 | 0.000665000   | 3.402607000  |
| 6  | -13.297652000 | 1.252280000   | 2.792583000  |
| 6  | -13.297926000 | -1.250959000  | 2.792561000  |
| 6  | -13.241997000 | 2.510216000   | 3.486405000  |
| 7  | -13.158339000 | 1.456328000   | 1.434485000  |
| 6  | -13.242545000 | -2.508920000  | 3.486361000  |
| 7  | -13.158656000 | -1.455013000  | 1.434460000  |
| 6  | -13.032135000 | 3.473502000   | 2.538366000  |
| 1  | -13.340034000 | 2.637636000   | 4.556550000  |
| 6  | -12.993575000 | 2.796420000   | 1.270259000  |
| 30 | -13.195642000 | 0.000673000   | 0.000031000  |
| 6  | -13.032889000 | -3.472234000  | 2.538306000  |
| 1  | -13.340610000 | -2.636337000  | 4.556504000  |
| 6  | -12.994180000 | -2.795138000  | 1.270211000  |

|    |               |              |              |
|----|---------------|--------------|--------------|
| 1  | -12.934351000 | 4.540730000  | 2.679001000  |
| 6  | -12.808125000 | 3.437214000  | 0.000056000  |
| 7  | -13.158680000 | -1.454989000 | -1.434424000 |
| 7  | -13.158364000 | 1.456352000  | -1.434399000 |
| 1  | -12.935338000 | -4.539485000 | 2.678922000  |
| 6  | -12.808864000 | -3.435950000 | -0.000002000 |
| 6  | -12.993598000 | 2.796442000  | -1.270154000 |
| 6  | -12.362522000 | 4.750094000  | 0.000064000  |
| 6  | -12.994201000 | -2.795117000 | -1.270202000 |
| 6  | -13.297973000 | -1.250911000 | -2.792520000 |
| 6  | -13.297701000 | 1.252328000  | -2.792499000 |
| 6  | -12.363541000 | -4.748925000 | -0.000017000 |
| 6  | -13.032180000 | 3.473545000  | -2.538249000 |
| 6  | -11.792963000 | 5.849100000  | 0.000064000  |
| 6  | -13.032932000 | -3.472191000 | -2.538307000 |
| 6  | -13.242604000 | -2.508860000 | -3.486343000 |
| 6  | -13.390854000 | 0.000724000  | -3.402543000 |
| 6  | -13.242058000 | 2.510276000  | -3.486300000 |
| 6  | -11.794193000 | -5.848038000 | -0.000027000 |
| 1  | -12.934399000 | 4.540776000  | -2.678867000 |
| 1  | -12.935383000 | -4.539439000 | -2.678943000 |
| 1  | -13.340689000 | -2.636259000 | -4.556486000 |
| 1  | -13.340113000 | 2.637714000  | -4.556442000 |
| 6  | -0.673406000  | 12.564740000 | -0.000050000 |
| 6  | 0.675044000   | 12.564825000 | -0.000056000 |
| 6  | -1.896846000  | 12.464955000 | -0.000044000 |
| 6  | 1.898488000   | 12.465099000 | -0.000058000 |
| 6  | -3.273234000  | 12.166905000 | -0.000031000 |
| 6  | 3.274829000   | 12.166821000 | -0.000048000 |
| 6  | -3.907503000  | 11.997202000 | 1.261330000  |
| 6  | -3.907526000  | 11.997201000 | -1.261381000 |
| 6  | 3.909071000   | 11.997014000 | 1.261313000  |
| 6  | 3.909091000   | 11.997013000 | -1.261399000 |
| 6  | -3.319045000  | 12.325279000 | 2.534568000  |
| 7  | -5.171131000  | 11.503388000 | 1.433967000  |
| 6  | -3.319091000  | 12.325277000 | -2.534630000 |
| 7  | -5.171157000  | 11.503387000 | -1.433994000 |
| 7  | 5.172620000   | 11.502996000 | 1.433947000  |
| 6  | 3.320668000   | 12.325185000 | 2.534552000  |
| 7  | 5.172642000   | 11.502996000 | -1.434014000 |
| 6  | 3.320707000   | 12.325185000 | -2.534647000 |
| 6  | -4.257494000  | 12.035964000 | 3.484548000  |
| 1  | -2.330102000  | 12.738415000 | 2.674356000  |
| 6  | -5.399966000  | 11.505668000 | 2.788956000  |
| 30 | -6.476024000  | 10.865618000 | -0.000002000 |
| 6  | -4.257557000  | 12.035961000 | -3.484592000 |
| 1  | -2.330151000  | 12.738412000 | -2.674436000 |
| 6  | -5.400017000  | 11.505665000 | -2.788979000 |
| 6  | 5.401458000   | 11.505240000 | 2.788936000  |
| 30 | 6.477405000   | 10.865013000 | -0.000023000 |
| 6  | 4.259073000   | 12.035721000 | 3.484530000  |
| 1  | 2.331790000   | 12.738480000 | 2.674341000  |
| 6  | 5.401501000   | 11.505239000 | -2.788999000 |
| 6  | 4.259126000   | 12.035720000 | -3.484611000 |
| 1  | 2.331831000   | 12.738479000 | -2.674452000 |
| 1  | -4.182583000  | 12.159681000 | 4.556977000  |
| 6  | -6.548379000  | 10.993534000 | 3.408149000  |
| 7  | -7.743562000  | 10.144268000 | 1.434777000  |
| 7  | -7.743588000  | 10.144267000 | -1.434756000 |

|    |               |              |              |
|----|---------------|--------------|--------------|
| 1  | -4.182666000  | 12.159677000 | -4.557023000 |
| 6  | -6.548441000  | 10.993530000 | -3.408151000 |
| 6  | 6.549789000   | 10.992920000 | 3.408127000  |
| 7  | 7.744830000   | 10.143459000 | 1.434752000  |
| 7  | 7.744852000   | 10.143460000 | -1.434780000 |
| 1  | 4.184185000   | 12.159451000 | 4.556959000  |
| 6  | 6.549842000   | 10.992920000 | -3.408173000 |
| 1  | 4.184255000   | 12.159451000 | -4.557041000 |
| 6  | -7.613999000  | 10.345088000 | 2.798477000  |
| 6  | -8.858108000  | 9.386796000  | 1.269411000  |
| 6  | -7.614050000  | 10.345085000 | -2.798459000 |
| 6  | -8.858131000  | 9.386794000  | -1.269370000 |
| 6  | 7.615303000   | 10.344301000 | 2.798453000  |
| 6  | 8.859252000   | 9.385805000  | 1.269385000  |
| 6  | 8.859272000   | 9.385805000  | -1.269395000 |
| 6  | 7.615346000   | 10.344301000 | -2.798482000 |
| 6  | -8.705013000  | 9.706278000  | 3.491349000  |
| 6  | -9.469642000  | 9.092667000  | 2.542605000  |
| 6  | -9.352684000  | 8.943637000  | 0.000025000  |
| 6  | -8.705077000  | 9.706274000  | -3.491311000 |
| 6  | -9.469688000  | 9.092664000  | -2.542552000 |
| 6  | 8.706215000   | 9.705314000  | 3.491323000  |
| 6  | 9.470742000   | 9.091577000  | 2.542578000  |
| 6  | 9.353753000   | 8.942565000  | -0.000001000 |
| 6  | 9.470781000   | 9.091578000  | -2.542579000 |
| 6  | 8.706270000   | 9.705315000  | -3.491335000 |
| 1  | -8.854356000  | 9.720280000  | 4.563107000  |
| 1  | -10.371451000 | 8.513087000  | 2.681134000  |
| 6  | -10.329433000 | 7.957371000  | 0.000035000  |
| 1  | -8.854438000  | 9.720275000  | -4.563066000 |
| 1  | -10.371499000 | 8.513083000  | -2.681064000 |
| 1  | 8.855563000   | 9.719293000  | 4.563081000  |
| 1  | 10.372456000  | 8.511851000  | 2.681105000  |
| 6  | 10.330345000  | 7.956143000  | 0.000006000  |
| 1  | 10.372498000  | 8.511852000  | -2.681092000 |
| 1  | 8.855634000   | 9.719294000  | -4.563091000 |
| 6  | -11.086599000 | 6.978180000  | 0.000047000  |
| 6  | 11.087395000  | 6.976862000  | 0.000017000  |
| 6  | 11.793708000  | 5.847751000  | 0.000041000  |
| 6  | 12.363151000  | 4.748687000  | 0.000058000  |
| 6  | 12.808557000  | 3.435741000  | 0.000065000  |
| 6  | 12.993938000  | 2.794928000  | -1.270138000 |
| 6  | 12.993912000  | 2.794934000  | 1.270275000  |
| 6  | 13.032619000  | 3.472012000  | -2.538240000 |
| 7  | 13.158514000  | 1.454813000  | -1.434369000 |
| 7  | 13.158485000  | 1.454820000  | 1.434515000  |
| 6  | 13.032569000  | 3.472024000  | 2.538374000  |
| 6  | 13.242360000  | 2.508702000  | -3.486281000 |
| 1  | 12.934993000  | 4.539255000  | -2.678870000 |
| 6  | 13.297824000  | 1.250754000  | -2.792466000 |
| 30 | 13.195585000  | -0.000855000 | 0.000077000  |
| 6  | 13.297769000  | 1.250767000  | 2.792616000  |
| 6  | 13.242291000  | 2.508719000  | 3.486424000  |
| 1  | 12.934940000  | 4.539268000  | 2.678997000  |
| 1  | 13.340436000  | 2.636115000  | -4.556424000 |
| 6  | 13.390801000  | -0.000870000 | -3.402496000 |
| 7  | 13.158424000  | -1.456529000 | -1.434362000 |
| 7  | 13.158395000  | -1.456522000 | 1.434522000  |
| 6  | 13.390734000  | -0.000854000 | 3.402654000  |

|    |               |               |              |
|----|---------------|---------------|--------------|
| 1  | 13.340345000  | 2.636137000   | 4.556568000  |
| 6  | 13.297746000  | -1.252485000  | -2.792460000 |
| 6  | 12.993763000  | -2.796632000  | -1.270125000 |
| 6  | 12.993738000  | -2.796626000  | 1.270288000  |
| 6  | 13.297690000  | -1.252471000  | 2.792622000  |
| 6  | 13.242207000  | -2.510434000  | -3.486268000 |
| 6  | 13.032403000  | -3.473726000  | -2.538223000 |
| 6  | 12.808337000  | -3.437426000  | 0.000082000  |
| 6  | 13.032352000  | -3.473713000  | 2.538391000  |
| 6  | 13.242138000  | -2.510417000  | 3.486436000  |
| 1  | 13.340275000  | -2.637858000  | -4.556410000 |
| 1  | 12.934708000  | -4.540963000  | -2.678847000 |
| 6  | 12.362861000  | -4.750349000  | 0.000081000  |
| 1  | 12.934654000  | -4.540950000  | 2.679019000  |
| 1  | 13.340184000  | -2.637836000  | 4.556580000  |
| 6  | 11.793395000  | -5.849403000  | 0.000075000  |
| 6  | 11.087009000  | -6.978469000  | 0.000060000  |
| 6  | 10.329825000  | -7.957647000  | 0.000045000  |
| 6  | 9.353010000   | -8.943846000  | 0.000032000  |
| 6  | 8.584320000   | -9.386970000  | -1.269365000 |
| 6  | 8.858398000   | -9.386970000  | 1.269416000  |
| 6  | 9.470016000   | -9.092884000  | -2.542545000 |
| 7  | 7.743839000   | -10.144368000 | -1.434756000 |
| 7  | 7.743801000   | -10.144368000 | 1.434777000  |
| 6  | 9.469949000   | -9.092884000  | 2.542612000  |
| 6  | 8.705367000   | -9.706444000  | -3.491306000 |
| 1  | 10.371867000  | -8.513365000  | -2.681053000 |
| 6  | 7.614293000   | -10.345178000 | -2.798459000 |
| 30 | 6.476219000   | -10.865631000 | -0.000006000 |
| 6  | 7.614219000   | -10.345178000 | 2.798477000  |
| 6  | 8.705275000   | -9.706444000  | 3.491353000  |
| 1  | 10.371797000  | -8.513366000  | 2.681144000  |
| 1  | 8.854733000   | -9.720456000  | -4.563061000 |
| 6  | 6.548641000   | -10.993549000 | -3.408156000 |
| 7  | 5.171312000   | -11.503306000 | -1.434004000 |
| 7  | 5.171275000   | -11.503307000 | 1.433957000  |
| 6  | 6.548551000   | -10.993549000 | 3.408145000  |
| 1  | 8.854613000   | -9.720457000  | 4.563112000  |
| 6  | 5.400178000   | -11.505601000 | -2.788988000 |
| 6  | 3.907646000   | -11.997028000 | -1.261396000 |
| 6  | 3.907613000   | -11.997029000 | 1.261316000  |
| 6  | 5.400104000   | -11.505602000 | 2.788947000  |
| 6  | 4.257684000   | -12.035815000 | -3.484606000 |
| 6  | 3.319193000   | -12.325063000 | -2.534647000 |
| 6  | 3.273338000   | -12.166689000 | -0.000049000 |
| 6  | 3.319126000   | -12.325063000 | 2.534551000  |
| 6  | 4.257592000   | -12.035816000 | 3.484535000  |
| 1  | 4.182789000   | -12.159527000 | -4.557036000 |
| 1  | 2.330223000   | -12.738127000 | -2.674457000 |
| 6  | 1.896925000   | -12.464629000 | -0.000067000 |
| 1  | 2.330152000   | -12.738128000 | 2.674335000  |
| 1  | 4.182668000   | -12.159528000 | 4.556963000  |
| 6  | 0.673469000   | -12.564217000 | -0.000082000 |
| 1  | -13.497777000 | 0.000668000   | 4.483838000  |
| 1  | -6.584592000  | 11.070358000  | 4.491083000  |
| 1  | 6.586017000   | 11.069740000  | 4.491061000  |
| 1  | 13.497714000  | -0.000854000  | 4.483885000  |
| 1  | 6.584755000   | -11.070377000 | 4.491079000  |
| 1  | -6.586130000  | -11.069558000 | 4.491014000  |

|   |               |               |              |
|---|---------------|---------------|--------------|
| 1 | 13.497804000  | -0.000876000  | -4.483725000 |
| 1 | 6.586087000   | 11.069740000  | -4.491106000 |
| 1 | -6.584673000  | 11.070353000  | -4.491084000 |
| 1 | -13.497854000 | 0.000744000   | -4.483772000 |
| 1 | -6.586185000  | -11.069552000 | -4.491155000 |
| 1 | 6.584873000   | -11.070376000 | -4.491088000 |

**c-P6<sup>+4</sup>** optimized with **CAM-B3LYP** - E=-17507.935387au

|    |               |               |              |
|----|---------------|---------------|--------------|
| 6  | -9.857571000  | -8.400201000  | -1.257711000 |
| 6  | -9.490636000  | -8.962286000  | -2.517482000 |
| 6  | -10.221962000 | -8.302142000  | -3.464008000 |
| 6  | -10.999187000 | -7.329665000  | -2.769379000 |
| 7  | -10.777802000 | -7.408436000  | -1.427559000 |
| 1  | -8.784528000  | -9.767328000  | -2.658965000 |
| 1  | -10.223396000 | -8.458116000  | -4.534023000 |
| 6  | -11.818458000 | -6.366042000  | -3.388070000 |
| 6  | -12.461839000 | -5.311268000  | -2.790225000 |
| 6  | -13.162941000 | -4.262109000  | -3.476791000 |
| 7  | -12.447884000 | -5.043560000  | -1.428059000 |
| 6  | -13.533540000 | -3.354863000  | -2.535323000 |
| 1  | -13.336504000 | -4.225352000  | -4.543726000 |
| 6  | -13.081573000 | -3.875583000  | -1.276339000 |
| 1  | -14.078957000 | -2.432305000  | -2.670317000 |
| 6  | -13.271315000 | -3.222275000  | 0.000044000  |
| 6  | -13.081567000 | -3.875586000  | 1.276425000  |
| 6  | -13.533524000 | -3.354868000  | 2.535413000  |
| 7  | -12.447877000 | -5.043563000  | 1.428138000  |
| 6  | -13.162919000 | -4.262116000  | 3.476877000  |
| 1  | -14.078939000 | -2.432310000  | 2.670413000  |
| 6  | -12.461821000 | -5.311274000  | 2.790304000  |
| 1  | -13.336474000 | -4.225361000  | 4.543813000  |
| 6  | -11.818435000 | -6.366048000  | 3.388143000  |
| 6  | -10.999167000 | -7.329669000  | 2.769444000  |
| 6  | -10.221936000 | -8.302147000  | 3.464066000  |
| 7  | -10.777791000 | -7.408438000  | 1.427623000  |
| 6  | -9.490617000  | -8.962290000  | 2.517534000  |
| 1  | -10.223363000 | -8.458123000  | 4.534081000  |
| 6  | -9.857561000  | -8.400202000  | 1.257767000  |
| 1  | -8.784507000  | -9.767331000  | 2.659011000  |
| 6  | -9.352603000  | -8.820043000  | 0.000025000  |
| 30 | -11.632345000 | -6.256007000  | 0.000036000  |
| 6  | -8.246408000  | -9.680770000  | 0.000019000  |
| 6  | -7.173474000  | -10.262734000 | 0.000005000  |
| 6  | -13.576233000 | -1.902183000  | 0.000046000  |
| 6  | -13.693550000 | -0.660001000  | 0.000036000  |
| 6  | -11.824632000 | 6.357733000   | 3.387992000  |
| 6  | -11.006155000 | 7.322014000   | 2.769318000  |
| 6  | -12.467048000 | 5.302336000   | 2.790163000  |
| 6  | -10.229821000 | 8.295211000   | 3.463934000  |
| 7  | -10.784714000 | 7.400884000   | 1.427498000  |
| 6  | -13.167242000 | 4.252601000   | 3.476743000  |
| 7  | -12.452747000 | 5.034562000   | 1.428025000  |
| 6  | -9.498976000  | 8.955905000   | 2.517414000  |
| 1  | -10.231481000 | 8.451270000   | 4.533936000  |
| 6  | -9.865325000  | 8.393404000   | 1.257667000  |
| 30 | -11.638181000 | 6.247643000   | -0.000084000 |
| 6  | -13.536961000 | 3.344955000   | 2.535297000  |

|    |               |              |              |
|----|---------------|--------------|--------------|
| 1  | -13.340855000 | 4.215752000  | 4.543666000  |
| 6  | -13.085373000 | 3.865998000  | 1.276329000  |
| 1  | -8.793568000  | 9.761561000  | 2.658898000  |
| 6  | -9.360594000  | 8.813585000  | -0.000088000 |
| 7  | -12.452640000 | 5.034463000  | -1.428171000 |
| 7  | -10.784605000 | 7.400784000  | -1.427683000 |
| 1  | -14.081559000 | 2.421916000  | 2.670311000  |
| 6  | -13.274422000 | 3.212446000  | -0.000041000 |
| 6  | -9.865229000  | 8.393316000  | -1.257851000 |
| 6  | -8.255100000  | 9.675125000  | -0.000078000 |
| 6  | -13.085277000 | 3.865910000  | -1.276441000 |
| 6  | -12.466838000 | 5.302142000  | -2.790328000 |
| 6  | -11.005945000 | 7.321821000  | -2.769514000 |
| 6  | -13.578100000 | 1.892075000  | -0.000008000 |
| 6  | -9.498785000  | 8.955729000  | -2.517610000 |
| 6  | -7.182557000  | 10.257860000 | -0.000068000 |
| 6  | -13.536770000 | 3.344779000  | -2.535407000 |
| 6  | -13.166980000 | 4.252359000  | -3.476888000 |
| 6  | -11.824375000 | 6.357496000  | -3.388182000 |
| 6  | -10.229558000 | 8.294968000  | -3.464139000 |
| 6  | -13.694167000 | 0.649776000  | 0.000015000  |
| 1  | -8.793366000  | 9.761375000  | -2.659096000 |
| 1  | -14.081358000 | 2.421731000  | -2.670398000 |
| 1  | -13.340512000 | 4.215435000  | -4.543822000 |
| 1  | -10.231137000 | 8.450952000  | -4.534153000 |
| 6  | 5.944931000   | 10.826687000 | 0.000132000  |
| 6  | 7.173503000   | 10.262811000 | 0.000147000  |
| 6  | 4.791205000   | 11.222536000 | 0.000109000  |
| 6  | 8.246425000   | 9.680826000  | 0.000147000  |
| 6  | 3.420311000   | 11.549505000 | 0.000067000  |
| 6  | 9.352601000   | 8.820074000  | 0.000113000  |
| 6  | 2.780217000   | 11.664948000 | 1.253130000  |
| 6  | 2.780253000   | 11.664766000 | -1.253031000 |
| 6  | 9.857663000   | 8.400308000  | 1.257837000  |
| 6  | 9.857450000   | 8.400141000  | -1.257641000 |
| 6  | 3.454728000   | 11.673866000 | 2.526030000  |
| 7  | 1.439412000   | 11.793863000 | 1.426679000  |
| 6  | 3.454803000   | 11.673499000 | -2.525912000 |
| 7  | 1.439453000   | 11.793657000 | -1.426638000 |
| 7  | 10.777893000  | 7.408541000  | 1.427677000  |
| 6  | 9.490840000   | 8.962484000  | 2.517599000  |
| 7  | 10.777651000  | 7.408352000  | -1.427506000 |
| 6  | 9.490412000   | 8.962150000  | -2.517415000 |
| 6  | 2.494866000   | 11.826547000 | 3.471528000  |
| 1  | 4.523127000   | 11.591783000 | 2.662391000  |
| 6  | 1.234923000   | 11.882747000 | 2.779347000  |
| 30 | -0.005113000  | 11.836938000 | -0.000005000 |
| 6  | 2.494968000   | 11.826044000 | -3.471460000 |
| 1  | 4.523205000   | 11.591395000 | -2.662229000 |
| 6  | 1.235005000   | 11.882344000 | -2.779326000 |
| 6  | 10.999386000  | 7.329856000  | 2.769483000  |
| 30 | 11.632300000  | 6.256001000  | 0.000089000  |
| 6  | 10.222233000  | 8.302391000  | 3.464110000  |
| 1  | 8.784756000   | 9.767546000  | 2.659087000  |
| 6  | 10.998914000  | 7.329488000  | -2.769340000 |
| 6  | 10.221642000  | 8.301931000  | -3.463964000 |
| 1  | 8.784304000   | 9.767194000  | -2.658889000 |
| 1  | 2.616100000   | 11.888412000 | 4.544437000  |
| 6  | -0.005217000  | 11.947499000 | 3.398077000  |



|    |              |              |              |
|----|--------------|--------------|--------------|
| 7  | -1.449665000 | 11.792890000 | 1.426634000  |
| 7  | -1.449623000 | 11.792688000 | -1.426680000 |
| 1  | 2.616234000  | 11.887752000 | -4.544375000 |
| 6  | -0.005116000 | 11.947010000 | -3.398102000 |
| 6  | 11.818698000 | 6.366266000  | 3.388173000  |
| 7  | 12.447952000 | 5.043647000  | 1.428198000  |
| 7  | 12.447706000 | 5.043456000  | -1.427999000 |
| 1  | 10.223757000 | 8.458438000  | 4.534115000  |
| 6  | 11.818119000 | 6.365815000  | -3.388042000 |
| 1  | 10.222983000 | 8.457835000  | -4.533989000 |
| 6  | -1.245256000 | 11.881941000 | 2.779333000  |
| 6  | -2.790354000 | 11.663102000 | 1.253060000  |
| 6  | -1.245173000 | 11.881543000 | -2.779386000 |
| 6  | -2.790317000 | 11.662924000 | -1.253128000 |
| 6  | 12.462021000 | 5.311447000  | 2.790346000  |
| 6  | 13.081623000 | 3.875657000  | 1.276505000  |
| 6  | 13.081401000 | 3.875486000  | -1.276259000 |
| 6  | 12.461543000 | 5.311075000  | -2.790184000 |
| 6  | -2.505203000 | 11.824939000 | 3.471468000  |
| 6  | -3.464925000 | 11.671607000 | 2.525946000  |
| 6  | -3.430355000 | 11.547208000 | -0.000035000 |
| 6  | -2.505100000 | 11.824444000 | -3.471550000 |
| 6  | -3.464850000 | 11.671249000 | -2.526034000 |
| 6  | 13.163176000 | 4.262330000  | 3.476924000  |
| 6  | 13.533690000 | 3.355019000  | 2.535487000  |
| 6  | 13.271252000 | 3.222260000  | 0.000151000  |
| 6  | 13.533252000 | 3.354679000  | -2.535248000 |
| 6  | 13.162578000 | 4.261865000  | -3.476743000 |
| 1  | -2.626521000 | 11.886752000 | 4.544371000  |
| 1  | -4.533275000 | 11.588832000 | 2.662268000  |
| 6  | -4.800963000 | 11.219270000 | -0.000034000 |
| 1  | -2.626386000 | 11.886103000 | -4.544466000 |
| 1  | -4.533196000 | 11.588455000 | -2.662377000 |
| 1  | 13.336828000 | 4.225646000  | 4.543847000  |
| 1  | 14.079113000 | 2.432467000  | 2.670498000  |
| 6  | 13.576170000 | 1.902168000  | 0.000210000  |
| 1  | 14.078652000 | 2.432109000  | -2.670229000 |
| 1  | 13.336046000 | 4.225038000  | -4.543691000 |
| 6  | -5.954439000 | 10.822621000 | -0.000043000 |
| 6  | 13.693511000 | 0.659989000  | 0.000228000  |
| 6  | 13.694157000 | -0.649787000 | 0.000190000  |
| 6  | 13.578098000 | -1.892087000 | 0.000153000  |
| 6  | 13.274431000 | -3.212462000 | 0.000109000  |
| 6  | 13.085313000 | -3.865920000 | -1.276299000 |
| 6  | 13.085360000 | -3.866022000 | 1.276471000  |
| 6  | 13.536827000 | -3.344779000 | -2.535253000 |
| 7  | 12.452684000 | -5.034475000 | -1.428047000 |
| 7  | 12.452733000 | -5.034589000 | 1.428148000  |
| 6  | 13.536917000 | -3.344982000 | 2.535452000  |
| 6  | 13.167057000 | -4.252355000 | -3.476747000 |
| 1  | 14.081415000 | -2.421729000 | -2.670228000 |
| 6  | 12.466905000 | -5.302144000 | -2.790207000 |
| 30 | 11.638200000 | -6.247667000 | 0.000016000  |
| 6  | 12.466999000 | -5.302365000 | 2.790286000  |
| 6  | 13.167177000 | -4.252631000 | 3.476886000  |
| 1  | 14.081510000 | -2.421943000 | 2.670482000  |
| 1  | 13.340608000 | -4.215424000 | -4.543678000 |
| 6  | 11.824458000 | -6.357497000 | -3.388079000 |
| 7  | 10.784657000 | -7.400803000 | -1.427606000 |

|    |               |               |              |
|----|---------------|---------------|--------------|
| 7  | 10.784702000  | -7.400913000  | 1.427576000  |
| 6  | 11.824569000  | -6.357763000  | 3.388097000  |
| 1  | 13.340764000  | -4.215785000  | 4.543814000  |
| 6  | 11.006021000  | -7.321829000  | -2.769432000 |
| 6  | 9.865282000   | -8.393340000  | -1.257798000 |
| 6  | 9.865320000   | -8.393437000  | 1.257720000  |
| 6  | 11.006109000  | -7.322046000  | 2.769401000  |
| 6  | 10.229653000  | -8.294977000  | -3.464078000 |
| 6  | 9.498865000   | -8.955746000  | -2.517567000 |
| 6  | 9.360621000   | -8.813617000  | -0.000047000 |
| 6  | 9.498942000   | -8.955941000  | 2.517457000  |
| 6  | 10.229763000  | -8.295246000  | 3.463996000  |
| 1  | 10.231253000  | -8.450954000  | -4.534093000 |
| 1  | 8.793453000   | -9.761395000  | -2.659072000 |
| 6  | 8.255128000   | -9.675157000  | -0.000066000 |
| 1  | 8.793534000   | -9.761600000  | 2.658922000  |
| 1  | 10.231397000  | -8.451308000  | 4.533998000  |
| 6  | 7.182586000   | -10.257894000 | -0.000089000 |
| 6  | 5.954466000   | -10.822652000 | -0.000128000 |
| 6  | 4.800984000   | -11.219283000 | -0.000149000 |
| 6  | 3.430374000   | -11.547214000 | -0.000131000 |
| 6  | 2.790337000   | -11.663013000 | -1.253217000 |
| 6  | 2.790369000   | -11.663018000 | 1.252971000  |
| 6  | 3.464874000   | -11.671435000 | -2.526122000 |
| 7  | 1.449643000   | -11.792781000 | -1.426763000 |
| 7  | 1.449680000   | -11.792787000 | 1.426551000  |
| 6  | 3.464939000   | -11.671445000 | 2.525858000  |
| 6  | 2.505124000   | -11.824695000 | -3.471628000 |
| 1  | 4.533220000   | -11.588657000 | -2.662468000 |
| 6  | 1.245196000   | -11.881736000 | -2.779463000 |
| 30 | 0.005131000   | -11.836919000 | -0.000087000 |
| 6  | 1.245267000   | -11.881747000 | 2.779256000  |
| 6  | 2.505214000   | -11.824709000 | 3.471389000  |
| 1  | 4.533289000   | -11.588667000 | 2.662177000  |
| 1  | 2.626412000   | -11.886436000 | -4.544539000 |
| 6  | 0.005139000   | -11.947241000 | -3.398176000 |
| 7  | -1.439433000  | -11.793728000 | -1.426726000 |
| 7  | -1.439396000  | -11.793732000 | 1.426590000  |
| 6  | 0.005226000   | -11.947253000 | 3.398001000  |
| 1  | 2.626530000   | -11.886453000 | 4.544296000  |
| 6  | -1.234983000  | -11.882519000 | -2.779407000 |
| 6  | -2.780231000  | -11.664810000 | -1.253131000 |
| 6  | -2.780200000  | -11.664812000 | 1.253030000  |
| 6  | -1.234911000  | -11.882529000 | 2.779265000  |
| 6  | -2.494944000  | -11.826257000 | -3.471548000 |
| 6  | -3.454779000  | -11.673631000 | -2.526013000 |
| 6  | -3.420291000  | -11.549450000 | -0.000042000 |
| 6  | -3.454714000  | -11.673636000 | 2.525929000  |
| 6  | -2.494855000  | -11.826267000 | 3.471439000  |
| 1  | -2.616209000  | -11.888046000 | -4.544458000 |
| 1  | -4.523180000  | -11.591525000 | -2.662338000 |
| 6  | -4.791181000  | -11.222469000 | -0.000026000 |
| 1  | -4.523111000  | -11.591531000 | 2.662282000  |
| 1  | -2.616092000  | -11.888059000 | 4.544352000  |
| 6  | -5.944907000  | -10.826619000 | -0.000012000 |
| 1  | -11.915729000 | 6.432769000   | 4.467447000  |
| 1  | -0.005240000  | 12.012655000  | 4.481281000  |
| 1  | 11.909727000  | 6.441378000   | 4.467628000  |
| 1  | 11.915639000  | -6.432801000  | 4.467555000  |

|   |               |               |              |
|---|---------------|---------------|--------------|
| 1 | 0.005246000   | -12.012339000 | 4.481210000  |
| 1 | -11.909365000 | -6.441088000  | 4.467611000  |
| 1 | 11.915492000  | -6.432450000  | -4.467546000 |
| 1 | 11.908961000  | 6.440782000   | -4.467523000 |
| 1 | -0.005104000  | 12.012008000  | -4.481316000 |
| 1 | -11.915390000 | 6.432457000   | -4.467650000 |
| 1 | -11.909396000 | -6.441080000  | -4.467539000 |
| 1 | 0.005129000   | -12.012322000 | -4.481385000 |

**c-P6<sup>+4</sup>** optimized with **M06-2X** - E=-17508.138955au

|    |              |               |              |
|----|--------------|---------------|--------------|
| 6  | 3.912177000  | -11.744377000 | 1.258307000  |
| 6  | 3.307802000  | -12.043196000 | 2.527942000  |
| 6  | 4.242833000  | -11.756802000 | 3.477782000  |
| 6  | 5.395881000  | -11.261757000 | 2.779785000  |
| 7  | 5.179949000  | -11.273987000 | 1.437305000  |
| 1  | 2.309806000  | -12.435023000 | 2.664584000  |
| 1  | 4.160585000  | -11.861621000 | 4.551166000  |
| 6  | 6.557743000  | -10.764802000 | 3.404365000  |
| 6  | 7.635237000  | -10.155069000 | 2.798170000  |
| 6  | 8.743747000  | -9.540091000  | 3.490925000  |
| 7  | 7.781042000  | -9.967164000  | 1.436407000  |
| 6  | 9.525767000  | -8.961237000  | 2.544845000  |
| 1  | 8.886386000  | -9.550344000  | 4.563329000  |
| 6  | 8.905186000  | -9.251409000  | 1.271980000  |
| 1  | 10.444196000 | -8.407140000  | 2.677248000  |
| 6  | 9.415651000  | -8.828794000  | 0.000070000  |
| 6  | 8.905277000  | -9.251532000  | -1.271838000 |
| 6  | 9.525942000  | -8.961506000  | -2.544692000 |
| 7  | 7.781132000  | -9.967288000  | -1.436263000 |
| 6  | 8.743972000  | -9.540449000  | -3.490762000 |
| 1  | 10.444386000 | -8.407435000  | -2.677095000 |
| 6  | 7.635413000  | -10.155342000 | -2.798015000 |
| 1  | 8.886681000  | -9.550815000  | -4.563155000 |
| 6  | 6.557964000  | -10.765152000 | -3.404218000 |
| 6  | 5.396065000  | -11.262054000 | -2.779668000 |
| 6  | 4.243054000  | -11.757146000 | -3.477687000 |
| 7  | 5.180047000  | -11.274165000 | -1.437196000 |
| 6  | 3.307959000  | -12.043443000 | -2.527878000 |
| 1  | 4.160869000  | -11.862062000 | -4.551066000 |
| 6  | 3.912259000  | -11.744517000 | -1.258235000 |
| 1  | 2.309967000  | -12.435269000 | -2.664547000 |
| 6  | 3.290309000  | -11.914733000 | 0.000028000  |
| 30 | 6.502355000  | -10.678190000 | 0.000047000  |
| 6  | 1.901009000  | -12.213000000 | -0.000004000 |
| 6  | 0.686669000  | -12.314142000 | -0.000046000 |
| 6  | 10.411865000 | -7.872094000  | 0.000061000  |
| 6  | 11.205768000 | -6.921657000  | 0.000045000  |
| 6  | 13.562282000 | 0.003659000   | -3.395559000 |
| 6  | 13.473994000 | 1.256008000   | -2.788286000 |
| 6  | 13.474878000 | -1.248741000  | -2.788263000 |
| 6  | 13.418994000 | 2.509253000   | -3.483242000 |
| 7  | 13.339446000 | 1.461893000   | -1.437070000 |
| 6  | 13.420663000 | -2.502034000  | -3.483193000 |
| 7  | 13.340524000 | -1.454690000  | -1.437037000 |
| 6  | 13.216186000 | 3.471934000   | -2.536491000 |
| 1  | 13.514400000 | 2.634685000   | -4.553495000 |
| 6  | 13.179447000 | 2.791096000   | -1.275118000 |

|    |              |              |              |
|----|--------------|--------------|--------------|
| 30 | 13.388639000 | 0.003627000  | -0.000026000 |
| 6  | 13.218522000 | -3.464828000 | -2.536412000 |
| 1  | 13.516108000 | -2.627425000 | -4.553447000 |
| 6  | 13.181392000 | -2.783992000 | -1.275052000 |
| 1  | 13.122404000 | 4.539841000  | -2.673798000 |
| 6  | 12.987395000 | 3.429676000  | -0.000085000 |
| 7  | 13.340528000 | -1.454659000 | 1.436985000  |
| 7  | 13.339473000 | 1.461937000  | 1.436944000  |
| 1  | 13.125437000 | -4.532798000 | -2.673699000 |
| 6  | 12.989792000 | -3.422674000 | 0.000001000  |
| 6  | 13.179474000 | 2.791135000  | 1.274966000  |
| 6  | 12.530120000 | 4.729427000  | -0.000092000 |
| 6  | 13.181402000 | -2.783966000 | 1.275039000  |
| 6  | 13.474898000 | -1.248671000 | 2.788205000  |
| 6  | 13.474038000 | 1.256081000  | 2.788165000  |
| 6  | 12.533357000 | -4.722717000 | 0.000017000  |
| 6  | 13.216232000 | 3.472002000  | 2.536319000  |
| 6  | 11.933001000 | 5.814612000  | -0.000071000 |
| 6  | 13.218546000 | -3.464766000 | 2.536416000  |
| 6  | 13.420693000 | -2.501943000 | 3.483169000  |
| 6  | 13.562318000 | 0.003745000  | 3.395466000  |
| 6  | 13.419053000 | 2.509342000  | 3.483091000  |
| 6  | 11.936890000 | -5.808259000 | 0.000027000  |
| 1  | 13.122455000 | 4.539912000  | 2.673603000  |
| 1  | 13.125465000 | -4.532732000 | 2.673734000  |
| 1  | 13.516146000 | -2.627307000 | 4.553425000  |
| 1  | 13.514477000 | 2.634802000  | 4.553339000  |
| 6  | 0.679215000  | 12.314550000 | -0.000053000 |
| 6  | -0.686698000 | 12.314239000 | -0.000030000 |
| 6  | 1.893607000  | 12.213994000 | -0.000049000 |
| 6  | -1.901039000 | 12.213100000 | 0.000019000  |
| 6  | 3.283064000  | 11.916445000 | -0.000024000 |
| 6  | -3.290340000 | 11.914836000 | 0.000048000  |
| 6  | 3.905083000  | 11.746510000 | -1.258287000 |
| 6  | 3.905028000  | 11.746423000 | 1.258256000  |
| 6  | -3.912279000 | 11.744594000 | -1.258215000 |
| 6  | -3.912230000 | 11.744513000 | 1.258325000  |
| 6  | 3.300616000  | 12.045125000 | -2.527927000 |
| 7  | 5.173109000  | 11.276804000 | -1.437258000 |
| 6  | 3.300505000  | 12.044947000 | 2.527893000  |
| 7  | 5.173045000  | 11.276702000 | 1.437252000  |
| 7  | -5.180054000 | 11.274214000 | -1.437180000 |
| 6  | -3.307979000 | 12.043540000 | -2.527856000 |
| 7  | -5.180008000 | 11.274142000 | 1.437309000  |
| 6  | -3.307875000 | 12.043356000 | 2.527965000  |
| 6  | 4.235841000  | 11.759287000 | -3.477745000 |
| 1  | 2.302420000  | 12.436436000 | -2.664586000 |
| 6  | 5.389113000  | 11.264790000 | -2.779732000 |
| 30 | 6.495746000  | 10.681563000 | 0.000004000  |
| 6  | 4.235689000  | 11.759044000 | 3.477731000  |
| 1  | 2.302304000  | 12.436250000 | 2.664536000  |
| 6  | 5.388991000  | 11.264592000 | 2.779733000  |
| 6  | -5.396072000 | 11.262119000 | -2.779651000 |
| 30 | -6.502400000 | 10.678265000 | 0.000072000  |
| 6  | -4.243070000 | 11.757242000 | -3.477667000 |
| 1  | -2.309993000 | 12.435383000 | -2.664518000 |
| 6  | -5.395970000 | 11.261944000 | 2.779789000  |
| 6  | -4.242930000 | 11.756997000 | 3.477794000  |
| 1  | -2.309877000 | 12.435174000 | 2.664616000  |

|    |               |              |              |
|----|---------------|--------------|--------------|
| 1  | 4.153593000   | 11.864153000 | -4.551125000 |
| 6  | 6.551249000   | 10.768460000 | -3.404292000 |
| 7  | 7.774855000   | 9.971294000  | -1.436332000 |
| 7  | 7.774795000   | 9.971197000  | 1.436348000  |
| 1  | 4.153396000   | 11.863835000 | 4.551114000  |
| 6  | 6.551102000   | 10.768224000 | 3.404311000  |
| 6  | -6.557961000  | 10.765209000 | -3.404213000 |
| 7  | -7.781131000  | 9.967350000  | -1.436266000 |
| 7  | -7.781078000  | 9.967254000  | 1.436410000  |
| 1  | -4.160888000  | 11.862173000 | -4.551045000 |
| 6  | -6.557836000  | 10.764993000 | 3.404362000  |
| 1  | -4.160702000  | 11.861845000 | 4.551176000  |
| 6  | 7.629012000   | 10.159204000 | -2.798088000 |
| 6  | 8.899351000   | 9.256087000  | -1.271902000 |
| 6  | 7.628893000   | 10.159014000 | 2.798110000  |
| 6  | 8.899298000   | 9.256002000  | 1.271915000  |
| 6  | -7.635411000  | 10.155393000 | -2.798017000 |
| 6  | -8.905251000  | 9.251553000  | -1.271841000 |
| 6  | -8.905203000  | 9.251465000  | 1.271978000  |
| 6  | -7.635305000  | 10.155208000 | 2.798168000  |
| 6  | 8.737851000   | 9.544817000  | -3.490835000 |
| 6  | 9.520126000   | 8.966299000  | -2.544759000 |
| 6  | 9.409976000   | 8.833661000  | 0.000004000  |
| 6  | 8.737707000   | 9.544583000  | 3.490861000  |
| 6  | 9.520021000   | 8.966129000  | 2.544780000  |
| 6  | -8.743946000  | 9.540460000  | -3.490766000 |
| 6  | -9.525900000  | 8.961496000  | -2.544696000 |
| 6  | -9.415624000  | 8.828807000  | 0.000063000  |
| 6  | -9.525802000  | 8.961322000  | 2.544839000  |
| 6  | -8.743814000  | 9.540227000  | 3.490917000  |
| 1  | 8.880520000   | 9.555192000  | -4.563234000 |
| 1  | 10.438831000  | 8.412660000  | -2.677159000 |
| 6  | 10.406752000  | 7.877541000  | -0.000007000 |
| 1  | 8.880330000   | 9.554887000  | 4.563267000  |
| 1  | 10.438720000  | 8.412481000  | 2.677180000  |
| 1  | -8.886650000  | 9.550814000  | -4.563160000 |
| 1  | -10.444324000 | 8.407391000  | -2.677100000 |
| 6  | -10.411826000 | 7.872094000  | 0.000047000  |
| 1  | -10.444220000 | 8.407208000  | 2.677243000  |
| 1  | -8.886477000  | 9.550509000  | 4.563317000  |
| 6  | 11.201236000  | 6.927589000  | -0.000039000 |
| 6  | -11.205741000 | 6.921668000  | 0.000036000  |
| 6  | -11.936833000 | 5.808251000  | -0.000017000 |
| 6  | -12.533269000 | 4.722693000  | -0.000038000 |
| 6  | -12.989661000 | 3.422635000  | -0.000060000 |
| 6  | -13.181347000 | 2.783941000  | 1.274977000  |
| 6  | -13.181189000 | 2.783937000  | -1.275112000 |
| 6  | -13.218569000 | 3.464761000  | 2.536345000  |
| 7  | -13.340492000 | 1.454640000  | 1.436929000  |
| 7  | -13.340321000 | 1.454632000  | -1.437080000 |
| 6  | -13.218242000 | 3.464752000  | -2.536485000 |
| 6  | -13.420761000 | 2.501952000  | 3.483098000  |
| 1  | -13.125498000 | 4.532729000  | 2.673651000  |
| 6  | -13.474928000 | 1.248668000  | 2.788146000  |
| 30 | -13.388480000 | -0.003696000 | -0.000081000 |
| 6  | -13.474585000 | 1.248661000  | -2.788312000 |
| 6  | -13.420324000 | 2.501941000  | -3.483260000 |
| 1  | -13.125148000 | 4.532720000  | -2.673782000 |
| 1  | -13.516273000 | 2.627328000  | 4.553348000  |

|    |               |               |              |
|----|---------------|---------------|--------------|
| 6  | -13.562385000 | -0.003735000  | 3.395421000  |
| 7  | -13.339485000 | -1.461958000  | 1.436929000  |
| 7  | -13.339299000 | -1.461964000  | -1.437094000 |
| 6  | -13.561977000 | -0.003742000  | -3.395605000 |
| 1  | -13.515700000 | 2.627314000   | -4.553523000 |
| 6  | -13.474089000 | -1.256084000  | 2.788140000  |
| 6  | -13.179499000 | -2.791165000  | 1.274970000  |
| 6  | -13.179363000 | -2.791170000  | -1.275117000 |
| 6  | -13.473765000 | -1.256090000  | -2.788321000 |
| 6  | -13.419148000 | -2.509333000  | 3.483085000  |
| 6  | -13.216317000 | -3.472012000  | 2.536332000  |
| 6  | -12.987392000 | -3.429733000  | -0.000060000 |
| 6  | -13.216077000 | -3.472024000  | -2.536480000 |
| 6  | -13.418779000 | -2.509345000  | -3.483257000 |
| 1  | -13.514611000 | -2.634775000  | 4.553331000  |
| 1  | -13.122569000 | -4.539922000  | 2.673634000  |
| 6  | -12.530175000 | -4.729505000  | -0.000037000 |
| 1  | -13.122344000 | -4.539937000  | -2.673767000 |
| 1  | -13.514133000 | -2.634790000  | -4.553513000 |
| 6  | -11.933099000 | -5.814714000  | -0.000019000 |
| 6  | -11.201357000 | -6.927706000  | 0.000012000  |
| 6  | -10.406870000 | -7.877657000  | 0.000041000  |
| 6  | -9.410077000  | -8.833756000  | 0.000031000  |
| 6  | -8.899406000  | -9.256140000  | 1.271934000  |
| 6  | -8.899428000  | -9.256133000  | -1.271881000 |
| 6  | -9.520158000  | -8.966339000  | 2.544803000  |
| 7  | -7.774889000  | -9.971312000  | 1.436350000  |
| 7  | -7.774919000  | -9.971312000  | -1.436320000 |
| 6  | -9.520198000  | -8.966315000  | -2.544736000 |
| 6  | -8.737843000  | -9.544812000  | 3.490871000  |
| 1  | -10.438874000 | -8.412721000  | 2.677211000  |
| 6  | -7.629003000  | -10.159186000 | 2.798109000  |
| 30 | -6.495779000  | -10.681598000 | 0.000004000  |
| 6  | -7.629057000  | -10.159177000 | -2.798080000 |
| 6  | -8.737906000  | -9.544794000  | -3.490820000 |
| 1  | -10.438911000 | -8.412687000  | -2.677126000 |
| 1  | -8.880482000  | -9.555167000  | 4.563274000  |
| 6  | -6.551206000  | -10.768388000 | 3.404303000  |
| 7  | -5.173113000  | -11.276765000 | 1.437247000  |
| 7  | -5.173142000  | -11.276759000 | -1.437274000 |
| 6  | -6.551280000  | -10.768392000 | -3.404299000 |
| 1  | -8.880564000  | -9.555143000  | -4.563221000 |
| 6  | -5.389069000  | -11.264702000 | 2.779726000  |
| 6  | -3.905076000  | -11.746440000 | 1.258247000  |
| 6  | -3.905113000  | -11.746459000 | -1.258299000 |
| 6  | -5.389135000  | -11.264716000 | -2.779748000 |
| 6  | -4.235756000  | -11.759130000 | 3.477718000  |
| 6  | -3.300555000  | -12.044977000 | 2.527879000  |
| 6  | -3.283100000  | -11.916413000 | -0.000032000 |
| 6  | -3.300630000  | -12.045031000 | -2.527942000 |
| 6  | -4.235850000  | -11.759179000 | -3.477762000 |
| 1  | -4.153466000  | -11.863948000 | 4.551099000  |
| 1  | -2.302342000  | -12.436251000 | 2.664520000  |
| 6  | -1.893638000  | -12.213933000 | -0.000047000 |
| 1  | -2.302430000  | -12.436330000 | -2.664603000 |
| 1  | -4.153590000  | -11.864016000 | -4.551143000 |
| 6  | -0.679246000  | -12.314468000 | -0.000057000 |
| 1  | 13.665324000  | 0.003686000   | -4.477809000 |
| 1  | 6.576549000   | 10.834333000  | -4.488442000 |

|   |               |               |              |
|---|---------------|---------------|--------------|
| 1 | -6.583302000  | 10.831099000  | -4.488360000 |
| 1 | -13.664952000 | -0.003770000  | -4.477862000 |
| 1 | -6.576575000  | -10.834231000 | -4.488450000 |
| 1 | 6.583313000   | -10.831037000 | -4.488366000 |
| 1 | -13.665485000 | -0.003772000  | 4.477666000  |
| 1 | -6.583134000  | 10.830807000  | 4.488515000  |
| 1 | 6.576356000   | 10.834023000  | 4.488465000  |
| 1 | 13.665371000  | 0.003798000   | 4.477716000  |
| 1 | 6.583019000   | -10.830580000 | 4.488521000  |
| 1 | -6.576474000  | -10.834227000 | 4.488455000  |

**c-P6<sup>+</sup>** optimized with **B3LYP** - E=-17510.640427au

|    |              |              |              |
|----|--------------|--------------|--------------|
| 6  | 12.691583000 | -2.784062000 | 1.269001000  |
| 6  | 12.737034000 | -3.461794000 | 2.539234000  |
| 6  | 12.949433000 | -2.498639000 | 3.485196000  |
| 6  | 12.996953000 | -1.239386000 | 2.789039000  |
| 7  | 12.851287000 | -1.442916000 | 1.432325000  |
| 1  | 12.647078000 | -4.529371000 | 2.682251000  |
| 1  | 13.056422000 | -2.625669000 | 4.554480000  |
| 6  | 13.092819000 | 0.013037000  | 3.399672000  |
| 6  | 12.994407000 | 1.265459000  | 2.789444000  |
| 6  | 12.944291000 | 2.524385000  | 3.486010000  |
| 7  | 12.848287000 | 1.469126000  | 1.432798000  |
| 6  | 12.729889000 | 3.487405000  | 2.540363000  |
| 1  | 13.051048000 | 2.651290000  | 4.555332000  |
| 6  | 12.685803000 | 2.809991000  | 1.269912000  |
| 1  | 12.637741000 | 4.554749000  | 2.683729000  |
| 6  | 12.506733000 | 3.449763000  | -0.000192000 |
| 6  | 12.685669000 | 2.810400000  | -1.270520000 |
| 6  | 12.729624000 | 3.488229000  | -2.540754000 |
| 7  | 12.848133000 | 1.469589000  | -1.433860000 |
| 6  | 12.943926000 | 2.525516000  | -3.486738000 |
| 1  | 12.637465000 | 4.555620000  | -2.683763000 |
| 6  | 12.994113000 | 1.266364000  | -2.790587000 |
| 1  | 13.050572000 | 2.652770000  | -4.556029000 |
| 6  | 13.092470000 | 0.014140000  | -3.401231000 |
| 6  | 12.996677000 | -1.238482000 | -2.790993000 |
| 6  | 12.949091000 | -2.497509000 | -3.487554000 |
| 7  | 12.851151000 | -1.442453000 | -1.434331000 |
| 6  | 12.736791000 | -3.460972000 | -2.541884000 |
| 1  | 13.055974000 | -2.624191000 | -4.556890000 |
| 6  | 12.691464000 | -2.783653000 | -1.271426000 |
| 1  | 12.646825000 | -4.528503000 | -2.685239000 |
| 6  | 12.513854000 | -3.423794000 | -0.001306000 |
| 30 | 12.906039000 | 0.013394000  | -0.000770000 |
| 6  | 12.081925000 | -4.746386000 | -0.001503000 |
| 6  | 11.549259000 | -5.862466000 | -0.001662000 |
| 6  | 12.072098000 | 4.771465000  | 0.000050000  |
| 6  | 11.537176000 | 5.886465000  | 0.000230000  |
| 6  | 6.519119000  | 11.283408000 | -3.399927000 |
| 6  | 5.383825000  | 11.820487000 | -2.789018000 |
| 6  | 7.560919000  | 10.581746000 | -2.789406000 |
| 6  | 4.265257000  | 12.400579000 | -3.485375000 |
| 7  | 5.136624000  | 11.798011000 | -1.431885000 |
| 6  | 8.630304000  | 9.915577000  | -3.486043000 |
| 7  | 7.668082000  | 10.357752000 | -1.432270000 |
| 6  | 3.324591000  | 12.695575000 | -2.539011000 |

|    |               |              |              |
|----|---------------|--------------|--------------|
| 1  | 4.206564000   | 12.553438000 | -4.555020000 |
| 6  | 3.892374000   | 12.323569000 | -1.268539000 |
| 30 | 6.431703000   | 11.129001000 | 0.001256000  |
| 6  | 9.363847000   | 9.256622000  | -2.539877000 |
| 1  | 8.791552000   | 9.943124000  | -4.555710000 |
| 6  | 8.754516000   | 9.555238000  | -1.269259000 |
| 1  | 2.352260000   | 13.145452000 | -2.681876000 |
| 6  | 3.249142000   | 12.487826000 | 0.001718000  |
| 7  | 7.668354000   | 10.357418000 | 1.434370000  |
| 7  | 5.136894000   | 11.797679000 | 1.434804000  |
| 1  | 10.246545000  | 8.649473000  | -2.682946000 |
| 6  | 9.223460000   | 9.084771000  | 0.000756000  |
| 6  | 3.892609000   | 12.323270000 | 1.271818000  |
| 6  | 1.886892000   | 12.771414000 | 0.001876000  |
| 6  | 8.754754000   | 9.554944000  | 1.270967000  |
| 6  | 7.561448000   | 10.581097000 | 2.791578000  |
| 6  | 5.384352000   | 11.819835000 | 2.791895000  |
| 6  | 10.159202000  | 8.055042000  | 0.000544000  |
| 6  | 3.325064000   | 12.694968000 | 2.542489000  |
| 6  | 0.654005000   | 12.867376000 | 0.001967000  |
| 6  | 9.364331000   | 9.256034000  | 2.541399000  |
| 6  | 8.630969000   | 9.914769000  | 3.487858000  |
| 6  | 6.519765000   | 11.282614000 | 3.402462000  |
| 6  | 4.265912000   | 12.399753000 | 3.488603000  |
| 6  | 10.865346000  | 7.039810000  | 0.000377000  |
| 1  | 2.352758000   | 13.144807000 | 2.685646000  |
| 1  | 10.247058000  | 8.648853000  | 2.684156000  |
| 1  | 8.792422000   | 9.942069000  | 4.557500000  |
| 1  | 4.207422000   | 12.552358000 | 4.558295000  |
| 6  | -10.880086000 | 7.017344000  | 0.001960000  |
| 6  | -11.549567000 | 5.862633000  | 0.001803000  |
| 6  | -10.176028000 | 8.034024000  | 0.002066000  |
| 6  | -12.082211000 | 4.746544000  | 0.001644000  |
| 6  | -9.242420000  | 9.065691000  | 0.002099000  |
| 6  | -12.514074000 | 3.423929000  | 0.001446000  |
| 6  | -8.774613000  | 9.537073000  | -1.267994000 |
| 6  | -8.774542000  | 9.536906000  | 1.272230000  |
| 6  | -12.691821000 | 2.784214000  | -1.268867000 |
| 6  | -12.691586000 | 2.783748000  | 1.271558000  |
| 6  | -9.383492000  | 9.237141000  | -2.538517000 |
| 7  | -7.689839000  | 10.341790000 | -1.431180000 |
| 6  | -9.383349000  | 9.236809000  | 2.542751000  |
| 7  | -7.689757000  | 10.341599000 | 1.435462000  |
| 7  | -12.851451000 | 1.443060000  | -1.432212000 |
| 6  | -12.737364000 | 3.461969000  | -2.539085000 |
| 7  | -12.851192000 | 1.442537000  | 1.434442000  |
| 6  | -12.736885000 | 3.461039000  | 2.542033000  |
| 6  | -8.651434000  | 9.897570000  | -3.484806000 |
| 1  | -10.264960000 | 8.628171000  | -2.681436000 |
| 6  | -7.583324000  | 10.565963000 | -2.788338000 |
| 30 | -6.454893000  | 11.115696000 | 0.002158000  |
| 6  | -8.651232000  | 9.897108000  | 3.489086000  |
| 1  | -10.264812000 | 8.627826000  | 2.685641000  |
| 6  | -7.583159000  | 10.565588000 | 2.792644000  |
| 6  | -12.997151000 | 1.239550000  | -2.788926000 |
| 30 | -12.906065000 | -0.013284000 | 0.000854000  |
| 6  | -12.949737000 | 2.498820000  | -3.485058000 |
| 1  | -12.647481000 | 4.529555000  | -2.682083000 |
| 6  | -12.996635000 | 1.238529000  | 2.791109000  |



|    |               |               |              |
|----|---------------|---------------|--------------|
| 6  | -12.949083000 | 2.497543000   | 3.487694000  |
| 1  | -12.646969000 | 4.528571000   | 2.685407000  |
| 1  | -8.812883000  | 9.924740000   | -4.554453000 |
| 6  | -6.543050000  | 11.269744000  | -3.399022000 |
| 7  | -5.161345000  | 11.787253000  | -1.431182000 |
| 7  | -5.161250000  | 11.787041000  | 1.435510000  |
| 1  | -8.812619000  | 9.924138000   | 4.558746000  |
| 6  | -6.542839000  | 11.269270000  | 3.403364000  |
| 6  | -13.092961000 | -0.012866000  | -3.399582000 |
| 7  | -12.848283000 | -1.468981000  | -1.432748000 |
| 7  | -12.848015000 | -1.469507000  | 1.433911000  |
| 1  | -13.056773000 | 2.625864000   | -4.554335000 |
| 6  | -13.092330000 | -0.014111000  | 3.401324000  |
| 1  | -13.055915000 | 2.624197000   | 4.557038000  |
| 6  | -5.408778000  | 11.809175000  | -2.788282000 |
| 6  | -3.918168000  | 12.315405000  | -1.268017000 |
| 6  | -5.408596000  | 11.808769000  | 2.792630000  |
| 6  | -3.918081000  | 12.315205000  | 1.272342000  |
| 6  | -12.994456000 | -1.265294000  | -2.789385000 |
| 6  | -12.685721000 | -2.809839000  | -1.269895000 |
| 6  | -12.685487000 | -2.810307000  | 1.270537000  |
| 6  | -12.993939000 | -1.266317000  | 2.790650000  |
| 6  | -4.291501000  | 12.391546000  | -3.484810000 |
| 6  | -3.351319000  | 12.688522000  | -2.538582000 |
| 6  | -3.275117000  | 12.481054000  | 0.002155000  |
| 6  | -4.291265000  | 12.391024000  | 3.489170000  |
| 6  | -3.351142000  | 12.688127000  | 2.542924000  |
| 6  | -12.944295000 | -2.524202000  | -3.485979000 |
| 6  | -12.729813000 | -3.487231000  | -2.540358000 |
| 6  | -12.506572000 | -3.449631000  | 0.000187000  |
| 6  | -12.729351000 | -3.488163000  | 2.540761000  |
| 6  | -12.943655000 | -2.525480000  | 3.486773000  |
| 1  | -4.233263000  | 12.544474000  | -4.554470000 |
| 1  | -2.379938000  | 13.140397000  | -2.681599000 |
| 6  | -1.913466000  | 12.767507000  | 0.002118000  |
| 1  | -4.232955000  | 12.543797000  | 4.558849000  |
| 1  | -2.379745000  | 13.139971000  | 2.685939000  |
| 1  | -13.051080000 | -2.651092000  | -4.555300000 |
| 1  | -12.637618000 | -4.554567000  | -2.683748000 |
| 6  | -12.071873000 | -4.771312000  | -0.000093000 |
| 1  | -12.637130000 | -4.555552000  | 2.683744000  |
| 1  | -13.050243000 | -2.652760000  | 4.556068000  |
| 6  | -0.680781000  | 12.866019000  | 0.002058000  |
| 6  | -11.536916000 | -5.886295000  | -0.000326000 |
| 6  | -10.865072000 | -7.039632000  | -0.000560000 |
| 6  | -10.158961000 | -8.054888000  | -0.000751000 |
| 6  | -9.223278000  | -9.084674000  | -0.000926000 |
| 6  | -8.754409000  | -9.555184000  | 1.269099000  |
| 6  | -8.754552000  | -9.554864000  | -1.271126000 |
| 6  | -9.363778000  | -9.256551000  | 2.539694000  |
| 7  | -7.668025000  | -10.357756000 | 1.432144000  |
| 7  | -7.668184000  | -10.357393000 | -1.434495000 |
| 6  | -9.364057000  | -9.255907000  | -2.541582000 |
| 6  | -8.630312000  | -9.915560000  | 3.485883000  |
| 1  | -10.246450000 | -8.649356000  | 2.682733000  |
| 6  | -7.560931000  | -10.581774000 | 2.789282000  |
| 30 | -6.431630000  | -11.129051000 | -0.001341000 |
| 6  | -7.561233000  | -10.581062000 | -2.791701000 |
| 6  | -8.630689000  | -9.914670000  | -3.488017000 |

|    |               |               |              |
|----|---------------|---------------|--------------|
| 1  | -10.246747000 | -8.648678000  | -2.684371000 |
| 1  | -8.791607000  | -9.943113000  | 4.555544000  |
| 6  | -6.519197000  | -11.283504000 | 3.399838000  |
| 7  | -5.136641000  | -11.798152000 | 1.431848000  |
| 7  | -5.136786000  | -11.797763000 | -1.434841000 |
| 6  | -6.519552000  | -11.282615000 | -3.402551000 |
| 1  | -8.792098000  | -9.941949000  | -4.557667000 |
| 6  | -5.383904000  | -11.820636000 | 2.788970000  |
| 6  | -3.892406000  | -12.323763000 | 1.268550000  |
| 6  | -3.892534000  | -12.323411000 | -1.271808000 |
| 6  | -5.384187000  | -11.819888000 | -2.791943000 |
| 6  | -4.265392000  | -12.400790000 | 3.485370000  |
| 6  | -3.324695000  | -12.695811000 | 2.539044000  |
| 6  | -3.249126000  | -12.488020000 | -0.001685000 |
| 6  | -3.324949000  | -12.695120000 | -2.542457000 |
| 6  | -4.265743000  | -12.399851000 | -3.488610000 |
| 1  | -4.206754000  | -12.553667000 | 4.555015000  |
| 1  | -2.352389000  | -13.145731000 | 2.681947000  |
| 6  | -1.886886000  | -12.771665000 | -0.001789000 |
| 1  | -2.352656000  | -13.144999000 | -2.685576000 |
| 1  | -4.207212000  | -12.552444000 | -4.558302000 |
| 6  | -0.654000000  | -12.867643000 | -0.001871000 |
| 6  | 0.680783000   | -12.866263000 | -0.001968000 |
| 6  | 1.913470000   | -12.767755000 | -0.002047000 |
| 6  | 3.275114000   | -12.481257000 | -0.002122000 |
| 6  | 3.918254000   | -12.315751000 | 1.268021000  |
| 6  | 3.917979000   | -12.315220000 | -1.272339000 |
| 6  | 3.351517000   | -12.689070000 | 2.538576000  |
| 7  | 5.161424000   | -11.787580000 | 1.431162000  |
| 7  | 5.161113000   | -11.786973000 | -1.435530000 |
| 6  | 3.350962000   | -12.687988000 | -2.542933000 |
| 6  | 4.291766000   | -12.392204000 | 3.484772000  |
| 1  | 2.380159000   | -13.140997000 | 2.681601000  |
| 6  | 5.408969000   | -11.809694000 | 2.788239000  |
| 30 | 6.454833000   | -11.115769000 | -0.002181000 |
| 6  | 5.408352000   | -11.808489000 | -2.792672000 |
| 6  | 4.290996000   | -12.390700000 | -3.489209000 |
| 1  | 2.379576000   | -13.139859000 | -2.685941000 |
| 1  | 4.233619000   | -12.545294000 | 4.554414000  |
| 6  | 6.543275000   | -11.270321000 | 3.398967000  |
| 7  | 7.689867000   | -10.342027000 | 1.431170000  |
| 7  | 7.689542000   | -10.341393000 | -1.435470000 |
| 6  | 6.542516000   | -11.268834000 | -3.403418000 |
| 1  | 4.232610000   | -12.543318000 | -4.558906000 |
| 6  | 7.583474000   | -10.566410000 | 2.788303000  |
| 6  | 8.774587000   | -9.537229000  | 1.268016000  |
| 6  | 8.774302000   | -9.536675000  | -1.272207000 |
| 6  | 7.582846000   | -10.565185000 | -2.792678000 |
| 6  | 8.651612000   | -9.898075000  | 3.484785000  |
| 6  | 9.383558000   | -9.237466000  | 2.538536000  |
| 6  | 9.242262000   | -9.065629000  | -0.002046000 |
| 6  | 9.382992000   | -9.236357000  | -2.542730000 |
| 6  | 8.650831000   | -9.896548000  | -3.489105000 |
| 1  | 8.813151000   | -9.925403000  | 4.554414000  |
| 1  | 10.265010000  | -8.628477000  | 2.681477000  |
| 6  | 10.175826000  | -8.033924000  | -0.001920000 |
| 1  | 10.264415000  | -8.627309000  | -2.685598000 |
| 1  | 8.812133000   | -9.923409000  | -4.558782000 |
| 6  | 10.879833000  | -7.017208000  | -0.001797000 |

|   |               |               |              |
|---|---------------|---------------|--------------|
| 1 | 6.575363000   | 11.382459000  | -4.480368000 |
| 1 | -6.599639000  | 11.368632000  | -4.479460000 |
| 1 | -13.210432000 | -0.012792000  | -4.479632000 |
| 1 | -6.575961000  | -11.381397000 | -4.483008000 |
| 1 | 6.598955000   | -11.367407000 | -4.483892000 |
| 1 | 13.209796000  | 0.014434000   | -4.481296000 |
| 1 | -6.575492000  | -11.382565000 | 4.480276000  |
| 1 | -13.209603000 | -0.014433000  | 4.481395000  |
| 1 | -6.599362000  | 11.368009000  | 4.483819000  |
| 1 | 6.576214000   | 11.381411000  | 4.482916000  |
| 1 | 13.210260000  | 0.012979000   | 4.479724000  |
| 1 | 6.599958000   | -11.369373000 | 4.479385000  |

**c-P6<sup>+</sup>6** optimized with **CAM-B3LYP** - E=-17507.119479au

|    |              |              |              |
|----|--------------|--------------|--------------|
| 6  | -5.376261000 | 11.970178000 | -1.279057000 |
| 6  | -6.070731000 | 11.963018000 | -2.538100000 |
| 6  | -5.156167000 | 12.314121000 | -3.477240000 |
| 6  | -3.903944000 | 12.500267000 | -2.791059000 |
| 7  | -4.090519000 | 12.293554000 | -1.427118000 |
| 1  | -7.120223000 | 11.745591000 | -2.672831000 |
| 1  | -5.304369000 | 12.431580000 | -4.542226000 |
| 6  | -2.697395000 | 12.749570000 | -3.386367000 |
| 6  | -1.427858000 | 12.799644000 | -2.763656000 |
| 6  | -0.187307000 | 12.897320000 | -3.462071000 |
| 7  | -1.221615000 | 12.690127000 | -1.426680000 |
| 6  | 0.794918000  | 12.814081000 | -2.517845000 |
| 1  | -0.076595000 | 13.008797000 | -4.531872000 |
| 6  | 0.135897000  | 12.698443000 | -1.253743000 |
| 1  | 1.864491000  | 12.853002000 | -2.663528000 |
| 6  | 0.779406000  | 12.634604000 | 0.000138000  |
| 6  | 0.135987000  | 12.698281000 | 1.254074000  |
| 6  | 0.795098000  | 12.813751000 | 2.518144000  |
| 7  | -1.221513000 | 12.689941000 | 1.427106000  |
| 6  | -0.187060000 | 12.896862000 | 3.462451000  |
| 1  | 1.864681000  | 12.852653000 | 2.663755000  |
| 6  | -1.427661000 | 12.799277000 | 2.764112000  |
| 1  | -0.076271000 | 13.008195000 | 4.532259000  |
| 6  | -2.697151000 | 12.749113000 | 3.386907000  |
| 6  | -3.903743000 | 12.499883000 | 2.791652000  |
| 6  | -5.155916000 | 12.313642000 | 3.477897000  |
| 7  | -4.090414000 | 12.293352000 | 1.427697000  |
| 6  | -6.070547000 | 11.962664000 | 2.538775000  |
| 1  | -5.304042000 | 12.430959000 | 4.542910000  |
| 6  | -5.376167000 | 11.969995000 | 1.279684000  |
| 1  | -7.120030000 | 11.745220000 | 2.673552000  |
| 6  | -5.985042000 | 11.657842000 | 0.000314000  |
| 30 | -2.647724000 | 12.540935000 | 0.000254000  |
| 6  | -7.153752000 | 10.980687000 | 0.000308000  |
| 6  | -8.156440000 | 10.231261000 | 0.000284000  |
| 6  | 2.186286000  | 12.446275000 | 0.000076000  |
| 6  | 3.361832000  | 12.140351000 | 0.000021000  |
| 6  | 9.851322000  | 8.532162000  | 3.386406000  |
| 6  | 10.662299000 | 7.604669000  | 2.791110000  |
| 6  | 8.869808000  | 9.338914000  | 2.763690000  |
| 6  | 11.547781000 | 6.699894000  | 3.477303000  |
| 7  | 10.686160000 | 7.327244000  | 1.427168000  |
| 6  | 7.940124000  | 10.166086000 | 3.462094000  |

|    |              |               |              |
|----|--------------|---------------|--------------|
| 7  | 8.639254000  | 9.376161000   | 1.426714000  |
| 6  | 12.064566000 | 5.867642000   | 2.538167000  |
| 1  | 11.736808000 | 6.703959000   | 4.542295000  |
| 6  | 11.515483000 | 6.292872000   | 1.279112000  |
| 30 | 9.685722000  | 8.395870000   | -0.000204000 |
| 6  | 7.106998000  | 10.692965000  | 2.517868000  |
| 1  | 7.919234000  | 10.321847000  | 4.531888000  |
| 6  | 7.562350000  | 10.202704000  | 1.253776000  |
| 1  | 12.769603000 | 5.060407000   | 2.672916000  |
| 6  | 11.812009000 | 5.676251000   | -0.000263000 |
| 7  | 8.639115000  | 9.376118000   | -1.427049000 |
| 7  | 10.686007000 | 7.327189000   | -1.427639000 |
| 1  | 6.278086000  | 11.370022000  | 2.663547000  |
| 6  | 7.010910000  | 10.540476000  | -0.000105000 |
| 6  | 11.515344000 | 6.292821000   | -1.279631000 |
| 6  | 12.334339000 | 4.430619000   | -0.000267000 |
| 6  | 7.562230000  | 10.202668000  | -1.254031000 |
| 6  | 8.869535000  | 9.338825000   | -2.764047000 |
| 6  | 10.662012000 | 7.604568000   | -2.791588000 |
| 6  | 5.775845000  | 11.240045000  | -0.000058000 |
| 6  | 12.064300000 | 5.867546000   | -2.538726000 |
| 6  | 12.680717000 | 3.227688000   | -0.000264000 |
| 6  | 7.106754000  | 10.692890000  | -2.518093000 |
| 6  | 7.939784000  | 10.165978000  | -3.462385000 |
| 6  | 9.850982000  | 8.532048000   | -3.386834000 |
| 6  | 11.547421000 | 6.699767000   | -3.477838000 |
| 6  | 4.654112000  | 11.706105000  | -0.000018000 |
| 1  | 12.769323000 | 5.060307000   | -2.673517000 |
| 1  | 6.277829000  | 11.369944000  | -2.663711000 |
| 1  | 7.918788000  | 10.321704000  | -4.532183000 |
| 1  | 11.736343000 | 6.703796000   | -4.542849000 |
| 6  | 8.833703000  | -8.981737000  | 0.000178000  |
| 6  | 7.811335000  | -9.883578000  | 0.000201000  |
| 6  | 9.686515000  | -8.116747000  | 0.000148000  |
| 6  | 6.846711000  | -10.621818000 | 0.000221000  |
| 6  | 10.553103000 | -6.992560000  | 0.000095000  |
| 6  | 5.623243000  | -11.341475000 | 0.000245000  |
| 6  | 10.930086000 | -6.467148000  | 1.253975000  |
| 6  | 10.930044000 | -6.467239000  | -1.253837000 |
| 6  | 5.054935000  | -11.649888000 | 1.254157000  |
| 6  | 5.055010000  | -11.650094000 | -1.253650000 |
| 6  | 10.700609000 | -7.095630000  | 2.518088000  |
| 7  | 11.601676000 | -5.287371000  | 1.426902000  |
| 6  | 10.700522000 | -7.095813000  | -2.517896000 |
| 7  | 11.601620000 | -5.287472000  | -1.426874000 |
| 7  | 3.800626000  | -12.169102000 | 1.427146000  |
| 6  | 5.707145000  | -11.500449000 | 2.518245000  |
| 7  | 3.800712000  | -12.169341000 | -1.426629000 |
| 6  | 5.707294000  | -11.500862000 | -2.517724000 |
| 6  | 11.263766000 | -6.286594000  | 3.462318000  |
| 1  | 10.199471000 | -8.041336000  | 2.663774000  |
| 6  | 11.799557000 | -5.163466000  | 2.763887000  |
| 30 | 12.185657000 | -3.977811000  | -0.000044000 |
| 6  | 11.263637000 | -6.286840000  | -3.462206000 |
| 1  | 10.199384000 | -8.041533000  | -2.663496000 |
| 6  | 11.799447000 | -5.163659000  | -2.763876000 |
| 6  | 3.653030000  | -12.349864000 | 2.764153000  |
| 30 | 2.428455000  | -12.585390000 | 0.000252000  |
| 6  | 4.834218000  | -11.958253000 | 3.462528000  |

|    |              |               |              |
|----|--------------|---------------|--------------|
| 1  | 6.707968000  | -11.121152000 | 2.663885000  |
| 6  | 3.653197000  | -12.350324000 | -2.763613000 |
| 6  | 4.834425000  | -11.958825000 | -3.461983000 |
| 1  | 6.708126000  | -11.121587000 | -2.663367000 |
| 1  | 11.304861000 | -6.438163000  | 4.532130000  |
| 6  | 12.390939000 | -4.038957000  | 3.386589000  |
| 7  | 12.692661000 | -2.604540000  | 1.427302000  |
| 7  | 12.692586000 | -2.604634000  | -1.427504000 |
| 1  | 11.304691000 | -6.438485000  | -4.532008000 |
| 6  | 12.390790000 | -4.039188000  | -3.386679000 |
| 6  | 2.463584000  | -12.796381000 | 3.386912000  |
| 7  | 1.002749000  | -12.917273000 | 1.427645000  |
| 7  | 1.002835000  | -12.917512000 | -1.427173000 |
| 1  | 4.979505000  | -12.017844000 | 4.532340000  |
| 6  | 2.463789000  | -12.796947000 | -3.386371000 |
| 1  | 4.979777000  | -12.018592000 | -4.531776000 |
| 6  | 12.778331000 | -2.869423000  | 2.791258000  |
| 6  | 13.055427000 | -1.329357000  | 1.279217000  |
| 6  | 12.778196000 | -2.869608000  | -2.791445000 |
| 6  | 13.055353000 | -1.329439000  | -1.279520000 |
| 6  | 1.254886000  | -13.035090000 | 2.791615000  |
| 6  | -0.307710000 | -13.118256000 | 1.279584000  |
| 6  | -0.307632000 | -13.118474000 | -1.279157000 |
| 6  | 1.255056000  | -13.035557000 | -2.791107000 |
| 6  | 13.243160000 | -1.691851000  | 3.477419000  |
| 6  | 13.396362000 | -0.724284000  | 2.538257000  |
| 6  | 13.089352000 | -0.646009000  | -0.000175000 |
| 6  | 13.242984000 | -1.692080000  | -3.477707000 |
| 6  | 13.396222000 | -0.724448000  | -2.538616000 |
| 6  | 0.028549000  | -13.349381000 | 3.477821000  |
| 6  | -0.950562000 | -13.380946000 | 2.538657000  |
| 6  | -0.989950000 | -13.066884000 | 0.000189000  |
| 6  | -0.950407000 | -13.381379000 | -2.538225000 |
| 6  | 0.028761000  | -13.349969000 | -3.477335000 |
| 1  | 13.418923000 | -1.622190000  | 4.542412000  |
| 1  | 13.732732000 | 0.293344000   | 2.672969000  |
| 6  | 13.087141000 | 0.704696000   | -0.000218000 |
| 1  | 13.418697000 | -1.622490000  | -4.542713000 |
| 1  | 13.732582000 | 0.293173000   | -2.673412000 |
| 1  | -0.062490000 | -13.514924000 | 4.542839000  |
| 1  | -2.002177000 | -13.587854000 | 2.673399000  |
| 6  | -2.329852000 | -12.896331000 | 0.000131000  |
| 1  | -2.002013000 | -13.588313000 | -2.672996000 |
| 1  | -0.062213000 | -13.515692000 | -4.542331000 |
| 6  | 12.939336000 | 1.947748000   | -0.000249000 |
| 6  | -3.544787000 | -12.594743000 | 0.000082000  |
| 6  | -4.782516000 | -12.178619000 | 0.000040000  |
| 6  | -5.932890000 | -11.684996000 | -0.000006000 |
| 6  | -7.103792000 | -11.011637000 | -0.000057000 |
| 6  | -7.678628000 | -10.640615000 | -1.279455000 |
| 6  | -7.678717000 | -10.640573000 | 1.279288000  |
| 6  | -7.324956000 | -11.238312000 | -2.538503000 |
| 7  | -8.601715000 | -9.688982000  | -1.427542000 |
| 7  | -8.601816000 | -9.688936000  | 1.427278000  |
| 6  | -7.325140000 | -11.238234000 | 2.538378000  |
| 6  | -8.086321000 | -10.621904000 | -3.477678000 |
| 1  | -6.611742000 | -12.038336000 | -2.673218000 |
| 6  | -8.873911000 | -9.630730000  | -2.791505000 |
| 30 | -9.537707000 | -8.563466000  | -0.000183000 |

|    |               |               |              |
|----|---------------|---------------|--------------|
| 6  | -8.874117000  | -9.630649000  | 2.791219000  |
| 6  | -8.086578000  | -10.621801000 | 3.477478000  |
| 1  | -6.611936000  | -12.038254000 | 2.673169000  |
| 1  | -8.113804000  | -10.808913000 | -4.542680000 |
| 6  | -9.693254000  | -8.710635000  | -3.386824000 |
| 7  | -10.380092000 | -7.403105000  | -1.427119000 |
| 7  | -10.380205000 | -7.403069000  | 1.426656000  |
| 6  | -9.693511000  | -8.710541000  | 3.386450000  |
| 1  | -8.114143000  | -10.808782000 | 4.542483000  |
| 6  | -10.371668000 | -7.636400000  | -2.764107000 |
| 6  | -11.066241000 | -6.231737000  | -1.254177000 |
| 6  | -11.066339000 | -6.231705000  | 1.253631000  |
| 6  | -10.371881000 | -7.636327000  | 2.763652000  |
| 6  | -11.076636000 | -6.610957000  | -3.462524000 |
| 6  | -11.495869000 | -5.718819000  | -2.518285000 |
| 6  | -11.332887000 | -5.642619000  | -0.000291000 |
| 6  | -11.496064000 | -5.718754000  | 2.517691000  |
| 6  | -11.076903000 | -6.610866000  | 3.461988000  |
| 1  | -11.228447000 | -6.570775000  | -4.532336000 |
| 1  | -12.064477000 | -4.812074000  | -2.663962000 |
| 6  | -11.873315000 | -4.330098000  | -0.000326000 |
| 1  | -12.064684000 | -4.812005000  | 2.663300000  |
| 1  | -11.228796000 | -6.570654000  | 4.531786000  |
| 6  | -12.196130000 | -3.159077000  | -0.000341000 |
| 6  | -12.466113000 | -1.822789000  | -0.000334000 |
| 6  | -12.623222000 | -0.618291000  | -0.000308000 |
| 6  | -12.634735000 | 0.801091000   | -0.000242000 |
| 6  | -12.617729000 | 1.447545000   | -1.254116000 |
| 6  | -12.617775000 | 1.447423000   | 1.253697000  |
| 6  | -12.814552000 | 0.808093000   | -2.518233000 |
| 7  | -12.440138000 | 2.793416000   | -1.427034000 |
| 7  | -12.440186000 | 2.793274000   | 1.426755000  |
| 6  | -12.814649000 | 0.807846000   | 2.517743000  |
| 6  | -12.774519000 | 1.793027000   | -3.462459000 |
| 1  | -12.986584000 | -0.248268000  | -2.663939000 |
| 6  | -12.522941000 | 3.011710000   | -2.764022000 |
| 30 | -12.114333000 | 4.189767000   | -0.000064000 |
| 6  | -12.523037000 | 3.011436000   | 2.763763000  |
| 6  | -12.774647000 | 1.792685000   | 3.462068000  |
| 1  | -12.986690000 | -0.248529000  | 2.663337000  |
| 1  | -12.898826000 | 1.697070000   | -4.532271000 |
| 6  | -12.314800000 | 4.265070000   | -3.386722000 |
| 7  | -11.688851000 | 5.590457000   | -1.427410000 |
| 7  | -11.688893000 | 5.590312000   | 1.427434000  |
| 6  | -12.314912000 | 4.264733000   | 3.386593000  |
| 1  | -12.898994000 | 1.696622000   | 4.531866000  |
| 6  | -11.917021000 | 5.431108000   | -2.791379000 |
| 6  | -11.207616000 | 6.825811000   | -1.279292000 |
| 6  | -11.207648000 | 6.825680000   | 1.279454000  |
| 6  | -11.917107000 | 5.430828000   | 2.791378000  |
| 6  | -11.576001000 | 6.650315000   | -3.477526000 |
| 6  | -11.113697000 | 7.513951000   | -2.538331000 |
| 6  | -10.821919000 | 7.390869000   | 0.000115000  |
| 6  | -11.113767000 | 7.513693000   | 2.538563000  |
| 6  | -11.576104000 | 6.649964000   | 3.477658000  |
| 1  | -11.673875000 | 6.811991000   | -4.542532000 |
| 1  | -10.767023000 | 8.528118000   | -2.673032000 |
| 6  | -10.004278000 | 8.465994000   | 0.000180000  |
| 1  | -10.767096000 | 8.527846000   | 2.673376000  |

|   |               |               |              |
|---|---------------|---------------|--------------|
| 1 | -11.674014000 | 6.811535000   | 4.542677000  |
| 6 | -9.135659000  | 9.367393000   | 0.000236000  |
| 1 | 9.934752000   | 8.632264000   | 4.464372000  |
| 1 | 12.506638000  | -4.098784000  | 4.464562000  |
| 1 | 2.508509000   | -12.918460000 | 4.464905000  |
| 1 | -9.803217000  | -8.780791000  | 4.464421000  |
| 1 | -12.443197000 | 4.286829000   | 4.464575000  |
| 1 | -2.703113000  | 12.879155000  | 4.464889000  |
| 1 | -9.802878000  | -8.780913000  | -4.464801000 |
| 1 | 2.508780000   | -12.919207000 | -4.464340000 |
| 1 | 12.506444000  | -4.099087000  | -4.464653000 |
| 1 | 9.934305000   | 8.632113000   | -4.464812000 |
| 1 | -2.703432000  | 12.879756000  | -4.464331000 |
| 1 | -12.443049000 | 4.287273000   | -4.464706000 |

**c-P6<sup>+</sup>** optimized with **M06-2X** - E=-17507.306773au

|    |               |               |              |
|----|---------------|---------------|--------------|
| 6  | -10.537792000 | -7.826432000  | -1.285367000 |
| 6  | -10.358856000 | -8.496954000  | -2.549563000 |
| 6  | -10.884589000 | -7.670789000  | -3.491874000 |
| 6  | -11.350092000 | -6.491972000  | -2.800467000 |
| 7  | -11.129459000 | -6.640408000  | -1.436849000 |
| 1  | -9.917643000  | -9.474476000  | -2.683435000 |
| 1  | -10.950878000 | -7.831281000  | -4.559874000 |
| 6  | -11.853125000 | -5.360460000  | -3.397172000 |
| 6  | -12.197462000 | -4.133789000  | -2.773974000 |
| 6  | -12.566545000 | -2.940665000  | -3.475553000 |
| 7  | -12.156233000 | -3.911375000  | -1.436407000 |
| 6  | -12.721404000 | -1.968958000  | -2.527918000 |
| 1  | -12.686442000 | -2.854731000  | -4.547048000 |
| 6  | -12.472950000 | -2.594599000  | -1.260541000 |
| 1  | -13.001226000 | -0.934685000  | -2.670009000 |
| 6  | -12.559232000 | -1.956091000  | 0.000077000  |
| 6  | -12.473186000 | -2.594628000  | 1.260700000  |
| 6  | -12.721876000 | -1.969020000  | 2.528046000  |
| 7  | -12.156496000 | -3.911406000  | 1.436593000  |
| 6  | -12.567181000 | -2.940750000  | 3.475687000  |
| 1  | -13.001734000 | -0.934752000  | 2.670109000  |
| 6  | -12.197961000 | -4.133857000  | 2.774147000  |
| 1  | -12.687273000 | -2.854840000  | 4.547163000  |
| 6  | -11.853709000 | -5.360539000  | 3.397375000  |
| 6  | -11.350557000 | -6.492035000  | 2.800731000  |
| 6  | -10.885160000 | -7.670864000  | 3.492189000  |
| 7  | -11.129694000 | -6.640439000  | 1.437149000  |
| 6  | -10.359266000 | -8.497006000  | 2.549946000  |
| 1  | -10.951625000 | -7.831381000  | 4.560174000  |
| 6  | -10.538000000 | -7.826458000  | 1.285733000  |
| 1  | -9.918068000  | -9.474528000  | 2.683869000  |
| 6  | -10.115780000 | -8.357148000  | 0.000212000  |
| 30 | -11.714693000 | -5.288963000  | 0.000118000  |
| 6  | -9.207237000  | -9.365006000  | 0.000286000  |
| 6  | -8.261247000  | -10.187983000 | 0.000393000  |
| 6  | -12.687236000 | -0.540028000  | 0.000073000  |
| 6  | -12.645173000 | 0.678018000   | 0.000093000  |
| 6  | -10.435348000 | 7.767262000   | 3.396681000  |
| 6  | -9.701866000  | 8.764946000   | 2.800004000  |
| 6  | -11.034004000 | 6.642540000   | 2.773527000  |
| 6  | -8.995441000  | 9.817182000   | 3.491454000  |

|    |               |              |              |
|----|---------------|--------------|--------------|
| 7  | -9.454406000  | 8.862698000  | 1.436421000  |
| 6  | -11.649749000 | 5.556034000  | 3.475217000  |
| 7  | -11.041110000 | 6.416236000  | 1.436005000  |
| 6  | -8.305109000  | 10.511812000 | 2.549204000  |
| 1  | -9.026097000  | 9.988258000  | 4.559427000  |
| 6  | -8.622973000  | 9.894874000  | 1.285004000  |
| 30 | -10.314947000 | 7.667347000  | -0.000497000 |
| 6  | -12.008553000 | 4.639691000  | 2.527705000  |
| 1  | -11.785408000 | 5.497888000  | 4.546702000  |
| 6  | -11.631931000 | 5.197526000  | 1.260274000  |
| 1  | -7.665325000  | 11.372560000 | 2.683096000  |
| 6  | -8.097019000  | 10.322981000 | -0.000518000 |
| 7  | -11.040470000 | 6.415680000  | -1.436835000 |
| 7  | -9.453725000  | 8.862116000  | -1.437500000 |
| 1  | -12.502944000 | 3.689144000  | 2.670002000  |
| 6  | -11.852205000 | 4.591869000  | -0.000244000 |
| 6  | -8.622357000  | 9.894345000  | -1.286113000 |
| 6  | -6.994173000  | 11.113372000 | -0.000415000 |
| 6  | -11.631379000 | 5.197043000  | -1.260891000 |
| 6  | -11.032756000 | 6.641456000  | -2.774441000 |
| 6  | -9.700561000  | 8.763824000  | -2.801159000 |
| 6  | -12.279779000 | 3.235848000  | -0.000084000 |
| 6  | -8.303894000  | 10.510771000 | -2.550413000 |
| 6  | -5.894458000  | 11.715709000 | -0.000314000 |
| 6  | -12.007434000 | 4.638714000  | -2.528274000 |
| 6  | -11.648194000 | 5.554680000  | -3.475983000 |
| 6  | -10.433793000 | 7.765919000  | -3.397772000 |
| 6  | -8.993798000  | 9.815773000  | -3.492704000 |
| 6  | -12.498795000 | 2.036885000  | 0.000037000  |
| 1  | -7.664037000  | 11.371457000 | -2.684354000 |
| 1  | -12.501764000 | 3.688113000  | -2.670420000 |
| 1  | -11.783367000 | 5.496115000  | -4.547507000 |
| 1  | -9.023954000  | 9.986419000  | -4.560760000 |
| 6  | 6.907955000   | 10.605919000 | 0.000554000  |
| 6  | 8.011278000   | 9.799277000  | 0.000438000  |
| 6  | 5.874287000   | 11.251638000 | 0.000545000  |
| 6  | 8.940012000   | 9.010052000  | 0.000313000  |
| 6  | 4.583982000   | 11.848872000 | 0.000372000  |
| 6  | 9.901444000   | 7.962483000  | 0.000159000  |
| 6  | 3.987782000   | 12.093661000 | 1.260877000  |
| 6  | 3.987901000   | 12.093175000 | -1.260275000 |
| 6  | 10.316140000  | 7.469156000  | 1.260686000  |
| 6  | 10.315634000  | 7.469056000  | -1.260493000 |
| 6  | 4.653717000   | 11.996155000 | 2.528322000  |
| 7  | 2.689104000   | 12.478056000 | 1.436592000  |
| 6  | 4.653951000   | 11.995177000 | -2.527620000 |
| 7  | 2.689237000   | 12.477498000 | -1.436257000 |
| 7  | 11.077630000  | 6.349161000  | 1.436411000  |
| 6  | 10.020602000  | 8.073874000  | 2.528109000  |
| 7  | 11.077052000  | 6.349042000  | -1.436431000 |
| 6  | 10.019584000  | 8.073667000  | -2.527851000 |
| 6  | 3.734623000   | 12.347776000 | 3.475844000  |
| 1  | 5.689285000   | 11.721285000 | 2.670604000  |
| 6  | 2.517029000   | 12.625077000 | 2.774135000  |
| 30 | 1.275429000   | 12.784671000 | 0.000043000  |
| 6  | 3.734952000   | 12.346451000 | -3.475360000 |
| 1  | 5.689532000   | 11.720248000 | -2.669698000 |
| 6  | 2.517289000   | 12.624014000 | -2.773870000 |
| 6  | 11.270334000  | 6.230136000  | 2.773924000  |



|    |              |              |              |
|----|--------------|--------------|--------------|
| 30 | 11.799813000 | 5.095696000  | -0.000103000 |
| 6  | 10.635787000 | 7.305779000  | 3.475625000  |
| 1  | 9.443342000  | 8.976491000  | 2.670446000  |
| 6  | 11.269198000 | 6.229893000  | -2.774012000 |
| 6  | 10.634357000 | 7.305469000  | -3.475551000 |
| 1  | 9.442272000  | 8.976274000  | -2.670031000 |
| 1  | 3.868857000  | 12.408603000 | 4.547361000  |
| 6  | 1.282622000  | 12.940839000 | 3.397265000  |
| 7  | -0.187614000 | 12.954733000 | 1.436806000  |
| 7  | -0.187485000 | 12.954183000 | -1.436933000 |
| 1  | 3.869286000  | 12.406875000 | -4.546887000 |
| 6  | 1.282941000  | 12.939529000 | -3.397244000 |
| 6  | 11.946755000 | 5.150376000  | 3.397013000  |
| 7  | 12.407023000 | 3.753842000  | 1.436724000  |
| 7  | 12.406408000 | 3.753699000  | -1.437057000 |
| 1  | 10.653056000 | 7.452387000  | 4.547106000  |
| 6  | 11.945338000 | 5.150063000  | -3.397285000 |
| 1  | 10.651185000 | 7.451975000  | -4.547051000 |
| 6  | 0.051314000  | 13.071630000 | 2.800473000  |
| 6  | -1.510536000 | 13.035776000 | 1.285388000  |
| 6  | 0.051576000  | 13.070549000 | -2.800624000 |
| 6  | -1.510420000 | 13.035304000 | -1.285674000 |
| 6  | 12.445841000 | 4.017145000  | 2.800309000  |
| 6  | 12.887000000 | 2.518392000  | 1.285307000  |
| 6  | 12.886440000 | 2.518257000  | -1.285729000 |
| 6  | 12.444652000 | 4.016876000  | -2.800682000 |
| 6  | -1.202292000 | 13.258508000 | 3.491849000  |
| 6  | -2.180633000 | 13.216570000 | 2.549554000  |
| 6  | -2.181222000 | 12.935669000 | -0.000156000 |
| 6  | -1.201965000 | 13.257175000 | -3.492190000 |
| 6  | -2.180394000 | 13.215619000 | -2.549975000 |
| 6  | 13.005609000 | 2.880065000  | 3.491740000  |
| 6  | 13.263573000 | 1.935329000  | 2.549485000  |
| 6  | 12.995465000 | 1.848964000  | -0.000200000 |
| 6  | 13.262480000 | 1.935076000  | -2.550010000 |
| 6  | 13.004117000 | 2.879724000  | -3.492245000 |
| 1  | -1.308060000 | 13.396357000 | 4.559827000  |
| 1  | -3.247741000 | 13.323753000 | 2.683418000  |
| 6  | -3.508288000 | 12.652783000 | -0.000165000 |
| 1  | -1.307630000 | 13.394610000 | -4.560232000 |
| 1  | -3.247487000 | 13.322769000 | -2.683985000 |
| 1  | 13.169368000 | 2.821491000  | 4.559694000  |
| 1  | 13.691032000 | 0.951721000  | 2.683370000  |
| 6  | 13.129749000 | 0.498781000  | -0.000151000 |
| 1  | 13.689882000 | 0.951455000  | -2.683986000 |
| 1  | 13.167424000 | 2.821050000  | -4.560263000 |
| 6  | -4.694171000 | 12.245570000 | -0.000220000 |
| 6  | 13.101630000 | -0.754751000 | -0.000101000 |
| 6  | 12.960564000 | -2.059160000 | -0.000029000 |
| 6  | 12.719743000 | -3.289642000 | -0.000013000 |
| 6  | 12.299680000 | -4.579943000 | -0.000038000 |
| 6  | 12.050159000 | -5.210401000 | -1.285586000 |
| 6  | 12.050142000 | -5.210430000 | 1.285490000  |
| 6  | 12.542318000 | -4.721087000 | -2.549814000 |
| 7  | 11.317115000 | -6.314672000 | -1.437006000 |
| 7  | 11.317097000 | -6.314706000 | 1.436875000  |
| 6  | 12.542291000 | -4.721146000 | 2.549733000  |
| 6  | 12.088183000 | -5.588716000 | -3.492081000 |
| 1  | 13.170087000 | -3.851538000 | -2.683680000 |

|    |              |               |              |
|----|--------------|---------------|--------------|
| 6  | 11.298500000 | -6.579982000  | -2.800599000 |
| 30 | 10.437932000 | -7.496446000  | -0.000084000 |
| 6  | 11.298481000 | -6.580053000  | 2.800460000  |
| 6  | 12.088146000 | -5.588797000  | 3.491976000  |
| 1  | 13.170058000 | -3.851600000  | 2.683624000  |
| 1  | 12.260556000 | -5.566429000  | -4.560052000 |
| 6  | 10.569088000 | -7.580612000  | -3.397309000 |
| 7  | 9.464848000  | -8.566836000  | -1.436581000 |
| 7  | 9.464862000  | -8.566888000  | 1.436380000  |
| 6  | 10.569082000 | -7.580710000  | 3.397141000  |
| 1  | 12.260509000 | -5.566532000  | 4.559949000  |
| 6  | 9.678154000  | -8.491423000  | -2.774134000 |
| 6  | 8.482317000  | -9.498966000  | -1.260726000 |
| 6  | 8.482339000  | -9.499017000  | 1.260500000  |
| 6  | 9.678168000  | -8.491516000  | 2.773937000  |
| 6  | 8.828709000  | -9.406968000  | -3.475765000 |
| 6  | 8.064411000  | -10.026672000 | -2.528107000 |
| 6  | 7.972167000  | -9.892559000  | -0.000116000 |
| 6  | 8.064445000  | -10.026778000 | 2.527862000  |
| 6  | 8.828742000  | -9.407102000  | 3.475539000  |
| 1  | 8.814159000  | -9.553802000  | -4.547254000 |
| 1  | 7.308144000  | -10.785649000 | -2.670348000 |
| 6  | 6.809549000  | -10.711097000 | -0.000110000 |
| 1  | 7.308183000  | -10.785765000 | 2.670079000  |
| 1  | 8.814198000  | -9.553976000  | 4.547023000  |
| 6  | 5.733527000  | -11.283332000 | -0.000023000 |
| 6  | 4.483217000  | -11.835396000 | 0.000232000  |
| 6  | 3.335364000  | -12.245023000 | 0.000413000  |
| 6  | 1.947300000  | -12.553403000 | 0.000409000  |
| 6  | 1.312810000  | -12.665502000 | -1.260189000 |
| 6  | 1.312803000  | -12.665448000 | 1.261007000  |
| 6  | 1.984423000  | -12.712001000 | -2.527517000 |
| 7  | -0.037947000 | -12.764119000 | -1.436105000 |
| 7  | -0.037952000 | -12.764057000 | 1.436913000  |
| 6  | 1.984406000  | -12.711907000 | 2.528338000  |
| 6  | 1.011664000  | -12.859691000 | -3.475208000 |
| 1  | 3.054798000  | -12.663920000 | -2.669676000 |
| 6  | -0.237214000 | -12.870966000 | -2.773693000 |
| 30 | -1.484552000 | -12.762131000 | 0.000401000  |
| 6  | -0.237232000 | -12.870856000 | 2.774504000  |
| 6  | 1.011641000  | -12.859570000 | 3.476027000  |
| 1  | 3.054780000  | -12.663825000 | 2.670504000  |
| 1  | 1.129978000  | -12.947672000 | -4.546715000 |
| 6  | -1.510502000 | -12.915765000 | -3.396977000 |
| 7  | -2.949885000 | -12.615366000 | -1.436586000 |
| 7  | -2.949891000 | -12.615323000 | 1.437370000  |
| 6  | -1.510522000 | -12.915639000 | 3.397780000  |
| 1  | 1.129951000  | -12.947523000 | 4.547538000  |
| 6  | -2.741344000 | -12.780466000 | -2.800232000 |
| 6  | -4.259665000 | -12.412398000 | -1.285169000 |
| 6  | -4.259673000 | -12.412368000 | 1.285933000  |
| 6  | -2.741360000 | -12.780368000 | 2.801022000  |
| 6  | -4.005935000 | -12.695622000 | -3.491668000 |
| 6  | -4.952877000 | -12.446025000 | -2.549376000 |
| 6  | -4.893533000 | -12.171604000 | 0.000376000  |
| 6  | -4.952891000 | -12.445958000 | 2.550138000  |
| 6  | -4.005956000 | -12.695508000 | 3.492446000  |
| 1  | -4.138620000 | -12.807907000 | -4.559633000 |
| 1  | -6.018324000 | -12.323452000 | -2.683226000 |

|   |               |               |              |
|---|---------------|---------------|--------------|
| 6 | -6.129726000  | -11.612164000 | 0.000376000  |
| 1 | -6.018341000  | -12.323392000 | 2.683978000  |
| 1 | -4.138648000  | -12.807757000 | 4.560414000  |
| 6 | -7.201583000  | -10.961624000 | 0.000384000  |
| 1 | -10.534722000 | 7.819021000   | 4.477846000  |
| 1 | 1.311376000   | 13.049065000  | 4.478431000  |
| 1 | 12.041258000  | 5.210721000   | 4.478170000  |
| 1 | 10.648343000  | -7.659718000  | 4.478318000  |
| 1 | -1.505515000  | -13.027282000 | 4.478964000  |
| 1 | -11.961924000 | -5.389869000  | 4.478532000  |
| 1 | 10.648348000  | -7.659592000  | -4.478489000 |
| 1 | 12.039391000  | 5.210309000   | -4.478487000 |
| 1 | 1.311804000   | 13.047338000  | -4.478449000 |
| 1 | -10.532674000 | 7.817245000   | -4.479002000 |
| 1 | -11.961150000 | -5.389760000  | -4.478348000 |
| 1 | -1.505486000  | -13.027445000 | -4.478158000 |

**c-P6<sup>+12</sup>** optimized with **B3LYP** - E=-17507.033566au

|    |              |               |              |
|----|--------------|---------------|--------------|
| 6  | 3.862411000  | -12.548154000 | 1.230231000  |
| 6  | 3.372575000  | -13.162008000 | 2.452977000  |
| 6  | 4.322023000  | -12.943469000 | 3.400510000  |
| 6  | 5.385935000  | -12.180125000 | 2.761569000  |
| 7  | 5.043008000  | -11.951512000 | 1.412230000  |
| 1  | 2.447016000  | -13.712482000 | 2.549296000  |
| 1  | 4.327224000  | -13.275187000 | 4.431593000  |
| 6  | 6.535207000  | -11.743554000 | 3.360078000  |
| 6  | 7.572082000  | -10.940487000 | 2.760751000  |
| 6  | 8.576435000  | -10.213099000 | 3.520008000  |
| 7  | 7.695022000  | -10.710166000 | 1.440617000  |
| 6  | 9.275959000  | -9.473294000  | 2.620489000  |
| 1  | 8.715794000  | -10.273494000 | 4.591972000  |
| 6  | 8.732554000  | -9.782936000  | 1.305689000  |
| 1  | 10.109002000 | -8.810030000  | 2.808385000  |
| 6  | 9.162368000  | -9.257759000  | 0.087383000  |
| 6  | 8.738941000  | -9.816822000  | -1.213298000 |
| 6  | 9.522181000  | -9.724895000  | -2.433970000 |
| 7  | 7.616267000  | -10.516568000 | -1.394857000 |
| 6  | 8.845221000  | -10.428241000 | -3.379534000 |
| 1  | 10.473865000 | -9.220892000  | -2.530212000 |
| 6  | 7.637986000  | -10.936568000 | -2.741582000 |
| 1  | 9.129449000  | -10.611253000 | -4.408569000 |
| 6  | 6.669482000  | -11.694799000 | -3.338849000 |
| 6  | 5.442264000  | -12.159154000 | -2.740894000 |
| 6  | 4.301411000  | -12.643656000 | -3.501167000 |
| 7  | 5.176890000  | -12.136197000 | -1.421806000 |
| 6  | 3.302572000  | -12.850877000 | -2.603873000 |
| 1  | 4.284348000  | -12.800819000 | -4.572234000 |
| 6  | 3.844962000  | -12.539749000 | -1.289000000 |
| 1  | 2.303597000  | -13.218856000 | -2.793063000 |
| 6  | 3.169047000  | -12.627263000 | -0.072301000 |
| 30 | 6.391742000  | -11.344577000 | 0.009023000  |
| 6  | 1.769776000  | -12.809436000 | -0.050007000 |
| 6  | 0.538432000  | -12.849916000 | -0.009674000 |
| 6  | 10.044661000 | -8.156631000  | 0.061888000  |
| 6  | 10.719042000 | -7.125647000  | 0.019822000  |
| 6  | 13.455177000 | -0.079145000  | -3.361914000 |
| 6  | 13.284966000 | 1.139433000   | -2.765428000 |

|    |              |              |              |
|----|--------------|--------------|--------------|
| 6  | 13.247203000 | -1.373403000 | -2.761220000 |
| 6  | 13.444900000 | 2.438443000  | -3.405613000 |
| 7  | 12.916547000 | 1.332182000  | -1.417221000 |
| 6  | 13.092437000 | -2.604764000 | -3.518895000 |
| 7  | 13.101684000 | -1.589899000 | -1.441076000 |
| 6  | 13.178102000 | 3.377394000  | -2.459942000 |
| 1  | 13.740817000 | 2.591987000  | -4.436162000 |
| 6  | 12.872005000 | 2.654460000  | -1.237017000 |
| 30 | 13.029588000 | -0.140202000 | -0.011654000 |
| 6  | 12.777863000 | -3.572242000 | -2.618427000 |
| 1  | 13.214102000 | -2.699633000 | -4.590512000 |
| 6  | 12.786967000 | -2.945113000 | -1.304451000 |
| 1  | 13.216632000 | 4.453481000  | -2.557597000 |
| 6  | 12.605684000 | 3.302055000  | 0.064308000  |
| 7  | 12.892779000 | -1.609928000 | 1.394400000  |
| 7  | 13.140252000 | 1.307704000  | 1.417090000  |
| 1  | 12.596392000 | -4.621690000 | -2.805201000 |
| 6  | 12.532261000 | -3.572646000 | -0.085348000 |
| 6  | 12.853562000 | 2.669329000  | 1.282099000  |
| 6  | 12.091969000 | 4.616215000  | 0.039898000  |
| 6  | 12.818951000 | -2.930970000 | 1.214556000  |
| 6  | 13.271809000 | -1.425092000 | 2.740751000  |
| 6  | 13.287635000 | 1.088025000  | 2.736496000  |
| 6  | 11.990678000 | -4.875535000 | -0.058493000 |
| 6  | 12.864483000 | 3.296387000  | 2.596096000  |
| 6  | 11.534984000 | 5.715132000  | -0.000867000 |
| 6  | 13.115289000 | -3.660246000 | 2.436127000  |
| 6  | 13.406879000 | -2.727211000 | 3.380340000  |
| 6  | 13.470948000 | -0.210400000 | 3.336247000  |
| 6  | 13.162907000 | 2.322339000  | 3.494960000  |
| 6  | 11.409739000 | -5.961909000 | -0.016239000 |
| 1  | 12.706243000 | 4.349433000  | 2.783782000  |
| 1  | 13.130973000 | -4.736902000 | 2.533819000  |
| 1  | 13.704364000 | -2.887040000 | 4.409482000  |
| 1  | 13.291915000 | 2.414488000  | 4.565958000  |
| 6  | 0.814400000  | 12.838152000 | 0.085532000  |
| 6  | -0.539466000 | 12.854548000 | 0.089253000  |
| 6  | 2.044913000  | 12.768724000 | 0.100378000  |
| 6  | -1.771165000 | 12.813882000 | 0.110867000  |
| 6  | 3.439848000  | 12.553498000 | 0.103232000  |
| 6  | -3.170341000 | 12.628995000 | 0.121481000  |
| 6  | 4.110691000  | 12.441981000 | -1.208587000 |
| 6  | 4.133286000  | 12.468403000 | 1.310240000  |
| 6  | -3.855384000 | 12.559789000 | -1.186059000 |
| 6  | -3.854531000 | 12.532917000 | 1.332946000  |
| 6  | 3.613945000  | 13.048707000 | -2.432132000 |
| 7  | 5.276113000  | 11.819247000 | -1.400539000 |
| 6  | 3.618170000  | 12.807620000 | 2.629128000  |
| 7  | 5.459527000  | 12.041361000 | 1.427655000  |
| 7  | -5.035501000 | 11.966096000 | -1.379936000 |
| 6  | -3.357776000 | 13.183523000 | -2.400577000 |
| 7  | -5.187943000 | 12.129799000 | 1.454160000  |
| 6  | -3.320242000 | 12.832404000 | 2.653773000  |
| 6  | 4.543845000  | 12.798286000 | -3.391045000 |
| 1  | 2.697807000  | 13.615753000 | -2.521718000 |
| 6  | 5.602268000  | 12.022534000 | -2.758047000 |
| 30 | 6.634837000  | 11.204608000 | -0.010181000 |
| 6  | 4.626913000  | 12.592936000 | 3.513451000  |
| 1  | 2.629443000  | 13.196944000 | 2.829125000  |

|    |               |              |              |
|----|---------------|--------------|--------------|
| 6  | 5.745950000   | 12.076104000 | 2.742004000  |
| 6  | -5.370839000  | 12.207566000 | -2.729053000 |
| 30 | -6.393156000  | 11.348572000 | 0.009887000  |
| 6  | -4.302292000  | 12.974927000 | -3.355259000 |
| 1  | -2.430646000  | 13.732967000 | -2.486866000 |
| 6  | -5.460770000  | 12.140085000 | 2.771754000  |
| 6  | -4.324539000  | 12.617806000 | 3.543173000  |
| 1  | -2.322113000  | 13.197660000 | 2.852402000  |
| 1  | 4.539448000   | 13.115657000 | -4.426617000 |
| 6  | 6.733186000   | 11.555271000 | -3.368160000 |
| 7  | 7.902097000   | 10.524386000 | -1.452974000 |
| 7  | 7.862919000   | 10.368537000 | 1.385721000  |
| 1  | 4.629723000   | 12.764163000 | 4.582507000  |
| 6  | 6.972340000   | 11.593518000 | 3.327442000  |
| 6  | -6.517835000  | 11.779147000 | -3.337494000 |
| 7  | -7.689349000  | 10.728935000 | -1.434276000 |
| 7  | -7.623199000  | 10.504036000 | 1.398909000  |
| 1  | -4.301280000  | 13.315716000 | -4.383385000 |
| 6  | -6.690230000  | 11.667180000 | 3.358690000  |
| 1  | -4.313758000  | 12.765081000 | 4.615729000  |
| 6  | 7.763284000   | 10.739742000 | -2.774009000 |
| 6  | 8.922297000   | 9.577583000  | -1.321448000 |
| 6  | 7.914676000   | 10.806178000 | 2.726132000  |
| 6  | 8.967764000   | 9.642974000  | 1.196590000  |
| 6  | -7.559013000  | 10.971691000 | -2.751319000 |
| 6  | -8.725538000  | 9.797814000  | -1.314212000 |
| 6  | -8.743429000  | 9.803827000  | 1.204793000  |
| 6  | -7.653015000  | 10.911331000 | 2.749471000  |
| 6  | 8.740531000   | 9.981862000  | -3.538672000 |
| 6  | 9.438623000   | 9.239558000  | -2.640091000 |
| 6  | 9.359303000   | 9.058560000  | -0.103076000 |
| 6  | 9.120797000   | 10.280864000 | 3.352304000  |
| 6  | 9.767903000   | 9.550664000  | 2.406113000  |
| 6  | -8.558292000  | 10.250702000 | -3.523263000 |
| 6  | -9.261305000  | 9.500763000  | -2.634967000 |
| 6  | -9.160336000  | 9.258477000  | -0.103866000 |
| 6  | -9.532450000  | 9.697877000  | 2.420538000  |
| 6  | -8.862104000  | 10.393728000 | 3.376314000  |
| 1  | 8.864382000   | 10.025309000 | -4.613344000 |
| 1  | 10.254806000  | 8.556718000  | -2.831734000 |
| 6  | 10.218163000  | 7.939139000  | -0.077687000 |
| 1  | 9.424882000   | 10.471414000 | 4.374284000  |
| 1  | 10.710044000  | 9.027649000  | 2.494729000  |
| 1  | -8.691706000  | 10.321309000 | -4.595362000 |
| 1  | -10.091850000 | 8.837691000  | -2.834149000 |
| 6  | -10.043915000 | 8.157910000  | -0.095868000 |
| 1  | -10.483003000 | 9.190036000  | 2.507083000  |
| 1  | -9.151911000  | 10.565901000 | 4.405658000  |
| 6  | 10.870374000  | 6.893956000  | -0.035983000 |
| 6  | -10.718817000 | 7.126666000  | -0.077759000 |
| 6  | -11.409346000 | 5.961994000  | -0.077215000 |
| 6  | -11.989750000 | 4.874809000  | -0.095349000 |
| 6  | -12.528535000 | 3.570328000  | -0.104286000 |
| 6  | -12.793450000 | 2.936771000  | 1.204066000  |
| 6  | -12.804520000 | 2.935303000  | -1.314938000 |
| 6  | -13.067883000 | 3.673892000  | 2.426021000  |
| 7  | -12.866177000 | 1.616972000  | 1.393149000  |
| 7  | -13.125155000 | 1.579952000  | -1.437677000 |
| 6  | -12.816085000 | 3.553950000  | -2.632895000 |

|    |               |               |              |
|----|---------------|---------------|--------------|
| 6  | -13.345328000 | 2.747109000   | 3.380561000  |
| 1  | -13.079475000 | 4.751122000   | 2.517407000  |
| 6  | -13.223174000 | 1.440949000   | 2.746679000  |
| 30 | -13.028913000 | 0.138841000   | -0.001563000 |
| 6  | -13.292326000 | 1.355345000   | -2.753828000 |
| 6  | -13.147902000 | 2.581612000   | -3.521827000 |
| 1  | -12.635057000 | 4.601665000   | -2.829537000 |
| 1  | -13.625183000 | 2.913629000   | 4.413566000  |
| 6  | -13.414754000 | 0.230338000   | 3.352757000  |
| 7  | -13.117830000 | -1.300033000  | 1.437921000  |
| 7  | -12.938960000 | -1.342222000  | -1.399407000 |
| 6  | -13.510409000 | 0.057413000   | -3.343224000 |
| 1  | -13.286851000 | 2.669910000   | -4.591914000 |
| 6  | -13.243319000 | -1.072068000  | 2.758114000  |
| 6  | -12.834096000 | -2.662694000  | 1.306722000  |
| 6  | -12.892061000 | -2.663363000  | -1.211891000 |
| 6  | -13.329812000 | -1.157544000  | -2.742533000 |
| 6  | -13.107322000 | -2.301731000  | 3.522079000  |
| 6  | -12.824308000 | -3.281588000  | 2.624534000  |
| 6  | -12.605311000 | -3.302977000  | 0.089212000  |
| 6  | -13.218348000 | -3.393663000  | -2.425140000 |
| 6  | -13.500394000 | -2.460401000  | -3.372056000 |
| 1  | -13.219088000 | -2.387121000  | 4.595563000  |
| 1  | -12.663946000 | -4.333601000  | 2.816111000  |
| 6  | -12.091992000 | -4.617263000  | 0.065441000  |
| 1  | -13.258639000 | -4.470319000  | -2.515622000 |
| 1  | -13.813207000 | -2.620164000  | -4.396660000 |
| 6  | -11.535465000 | -5.716422000  | 0.024920000  |
| 6  | -10.871141000 | -6.895400000  | -0.010968000 |
| 6  | -10.219523000 | -7.940945000  | -0.052429000 |
| 6  | -9.360685000  | -9.060484000  | -0.076715000 |
| 6  | -8.949430000  | -9.627336000  | 1.224513000  |
| 6  | -8.941714000  | -9.595453000  | -1.294507000 |
| 6  | -9.730896000  | -9.517992000  | 2.444892000  |
| 7  | -7.841911000  | -10.350634000 | 1.406896000  |
| 7  | -7.923807000  | -10.544303000 | -1.428563000 |
| 6  | -9.477877000  | -9.275019000  | -2.609685000 |
| 6  | -9.069286000  | -10.234915000 | 3.391136000  |
| 1  | -10.671669000 | -8.993780000  | 2.540538000  |
| 6  | -7.872897000  | -10.769119000 | 2.753926000  |
| 30 | -6.635092000  | -11.205805000 | 0.003955000  |
| 6  | -7.805291000  | -10.777885000 | -2.748539000 |
| 6  | -8.793704000  | -10.029768000 | -3.508576000 |
| 1  | -10.296605000 | -8.594354000  | -2.798247000 |
| 1  | -9.357633000  | -10.411173000 | 4.420206000  |
| 6  | -6.920933000  | -11.547408000 | 3.351978000  |
| 7  | -5.437562000  | -12.021899000 | 1.435648000  |
| 7  | -5.298517000  | -11.841267000 | -1.398407000 |
| 6  | -6.785303000  | -11.602879000 | -3.347002000 |
| 1  | -8.933813000  | -10.087662000 | -4.580577000 |
| 6  | -5.703720000  | -12.038204000 | 2.754683000  |
| 6  | -4.114399000  | -12.453575000 | 1.303569000  |
| 6  | -4.131095000  | -12.463039000 | -1.215620000 |
| 6  | -5.645741000  | -12.063282000 | -2.747789000 |
| 6  | -4.573524000  | -12.545963000 | 3.515701000  |
| 6  | -3.579108000  | -12.775166000 | 2.618842000  |
| 6  | -3.440005000  | -12.555990000 | 0.087168000  |
| 6  | -3.654183000  | -13.088213000 | -2.437731000 |
| 6  | -4.598293000  | -12.849785000 | -3.385810000 |

|   |               |               |              |
|---|---------------|---------------|--------------|
| 1 | -4.560066000  | -12.702513000 | 4.586912000  |
| 1 | -2.588192000  | -13.164048000 | 2.808594000  |
| 6 | -2.044976000  | -12.768222000 | 0.065525000  |
| 1 | -2.740660000  | -13.658566000 | -2.533300000 |
| 1 | -4.610232000  | -13.181997000 | -4.416677000 |
| 6 | -0.814785000  | -12.835378000 | 0.025486000  |
| 1 | 13.727787000  | -0.082852000  | -4.414097000 |
| 1 | 6.852965000   | 11.774455000  | -4.425993000 |
| 1 | -6.643767000  | 12.025399000  | -4.388653000 |
| 1 | -13.800720000 | 0.054904000   | -4.390678000 |
| 1 | -6.921534000  | -11.836627000 | -4.399726000 |
| 1 | 6.806049000   | -11.936195000 | -4.389807000 |
| 1 | -13.675264000 | 0.239357000   | 4.407961000  |
| 1 | -6.833233000  | 11.898803000  | 4.410993000  |
| 1 | 7.130507000   | 11.846387000  | 4.372671000  |
| 1 | 13.748709000  | -0.212490000  | 4.387088000  |
| 1 | 6.666902000   | -11.979457000 | 4.412900000  |
| 1 | -7.062891000  | -11.785215000 | 4.403040000  |

**c-P6<sup>+12</sup>** optimized with **CAM-B3LYP** - E=-17503.560977au

|    |               |              |              |
|----|---------------|--------------|--------------|
| 6  | -8.045393000  | 10.358881000 | -1.212942000 |
| 6  | -8.848219000  | 10.329924000 | -2.422044000 |
| 6  | -8.145208000  | 10.995313000 | -3.362089000 |
| 6  | -6.897737000  | 11.418985000 | -2.736899000 |
| 7  | -6.891931000  | 10.977019000 | -1.394943000 |
| 1  | -9.829724000  | 9.886042000  | -2.507979000 |
| 1  | -8.428490000  | 11.208326000 | -4.385206000 |
| 6  | -5.905153000  | 12.119492000 | -3.327752000 |
| 6  | -4.635858000  | 12.481746000 | -2.725667000 |
| 6  | -3.455113000  | 12.839975000 | -3.493643000 |
| 7  | -4.388541000  | 12.461348000 | -1.422870000 |
| 6  | -2.449723000  | 12.971151000 | -2.604714000 |
| 1  | -3.425194000  | 12.971044000 | -4.567342000 |
| 6  | -3.016904000  | 12.738155000 | -1.282942000 |
| 1  | -1.419881000  | 13.237351000 | -2.796314000 |
| 6  | -2.349210000  | 12.773654000 | -0.086571000 |
| 6  | -3.053291000  | 12.754959000 | 1.211786000  |
| 6  | -2.528382000  | 13.362802000 | 2.421039000  |
| 7  | -4.256962000  | 12.241401000 | 1.393810000  |
| 6  | -3.487063000  | 13.229972000 | 3.361217000  |
| 1  | -1.568177000  | 13.851048000 | 2.506987000  |
| 6  | -4.597931000  | 12.521765000 | 2.735955000  |
| 1  | -3.475917000  | 13.583809000 | 4.384479000  |
| 6  | -5.765154000  | 12.185022000 | 3.326914000  |
| 6  | -6.841727000  | 11.421357000 | 2.724714000  |
| 6  | -7.859497000  | 10.723680000 | 3.492604000  |
| 7  | -6.980752000  | 11.216189000 | 1.421856000  |
| 6  | -8.590800000  | 10.021579000 | 2.603526000  |
| 1  | -7.980247000  | 10.781830000 | 4.566355000  |
| 6  | -8.054565000  | 10.319025000 | 1.281771000  |
| 1  | -9.442512000  | 9.384351000  | 2.795028000  |
| 6  | -8.500033000  | 9.820645000  | 0.085294000  |
| 30 | -5.638095000  | 11.741797000 | -0.000525000 |
| 6  | -9.453850000  | 8.764087000  | 0.054025000  |
| 6  | -10.183201000 | 7.789724000  | 0.012310000  |
| 6  | -0.928258000  | 12.857275000 | -0.055489000 |
| 6  | 0.288187000   | 12.817167000 | -0.013902000 |

|    |              |               |              |
|----|--------------|---------------|--------------|
| 6  | 7.671384000  | 11.084451000  | 3.336929000  |
| 6  | 8.546551000  | 10.242250000  | 2.745469000  |
| 6  | 6.471508000  | 11.635003000  | 2.735236000  |
| 6  | 9.715587000  | 9.634296000   | 3.370198000  |
| 7  | 8.473912000  | 9.807193000   | 1.403206000  |
| 6  | 5.358541000  | 12.167176000  | 3.503589000  |
| 7  | 6.223972000  | 11.653217000  | 1.432448000  |
| 6  | 10.309814000 | 8.870862000   | 2.429601000  |
| 1  | 10.027886000 | 9.801306000   | 4.393414000  |
| 6  | 9.520566000  | 9.021779000   | 1.220633000  |
| 30 | 7.350291000  | 10.753918000  | 0.009470000  |
| 6  | 4.384581000  | 12.449605000  | 2.614856000  |
| 1  | 5.348784000  | 12.300479000  | 4.577386000  |
| 6  | 4.909999000  | 12.134453000  | 1.292860000  |
| 1  | 11.212906000 | 8.283587000   | 2.515104000  |
| 6  | 9.888543000  | 8.421899000   | -0.078042000 |
| 7  | 6.060633000  | 11.457704000  | -1.384378000 |
| 7  | 8.598060000  | 10.032264000  | -1.413444000 |
| 1  | 3.406863000  | 12.868399000  | 2.806754000  |
| 6  | 4.255357000  | 12.271380000  | 0.096583000  |
| 6  | 9.523713000  | 8.982854000   | -1.274115000 |
| 6  | 10.671354000 | 7.233058000   | -0.047596000 |
| 6  | 4.948521000  | 12.147331000  | -1.201857000 |
| 6  | 6.440099000  | 11.684223000  | -2.726357000 |
| 6  | 8.491576000  | 10.256993000  | -2.716143000 |
| 6  | 2.863393000  | 12.568944000  | 0.065699000  |
| 6  | 10.008710000 | 8.608585000   | -2.596147000 |
| 6  | 11.244624000 | 6.159398000   | -0.006458000 |
| 6  | 4.521633000  | 12.828485000  | -2.410614000 |
| 6  | 5.449178000  | 12.552812000  | -3.350991000 |
| 6  | 7.542939000  | 11.175188000  | -3.317679000 |
| 6  | 9.392029000  | 9.413865000   | -3.484646000 |
| 6  | 1.654870000  | 12.713241000  | 0.024145000  |
| 1  | 10.754140000 | 7.849905000   | -2.788207000 |
| 1  | 3.646355000  | 13.456456000  | -2.496109000 |
| 1  | 5.491704000  | 12.905009000  | -4.373996000 |
| 1  | 9.520127000  | 9.453787000   | -4.558378000 |
| 6  | 10.958291000 | -6.659040000  | -0.084749000 |
| 6  | 10.184333000 | -7.790885000  | -0.086313000 |
| 6  | 11.601597000 | -5.625131000  | -0.101937000 |
| 6  | 9.454129000  | -8.765319000  | -0.106187000 |
| 6  | 12.239060000 | -4.352113000  | -0.113014000 |
| 6  | 8.499166000  | -9.821178000  | -0.120631000 |
| 6  | 12.548322000 | -3.739426000  | 1.194795000  |
| 6  | 12.566600000 | -3.750215000  | -1.300103000 |
| 6  | 8.055380000  | -10.350547000 | 1.184876000  |
| 6  | 8.043756000  | -10.327798000 | -1.310060000 |
| 6  | 12.786829000 | -4.504020000  | 2.405548000  |
| 7  | 12.702842000 | -2.441312000  | 1.386305000  |
| 6  | 12.512215000 | -4.351573000  | -2.626209000 |
| 7  | 13.014962000 | -2.423130000  | -1.424564000 |
| 7  | 6.904374000  | -10.969188000 | 1.380322000  |
| 6  | 8.868071000  | -10.312599000 | 2.387108000  |
| 7  | 6.968071000  | -11.224867000 | -1.435594000 |
| 6  | 8.569315000  | -10.039394000 | -2.638081000 |
| 6  | 13.133240000 | -3.612355000  | 3.357098000  |
| 1  | 12.726055000 | -5.579976000  | 2.485113000  |
| 6  | 13.089454000 | -2.293180000  | 2.737112000  |
| 30 | 12.988382000 | -0.988405000  | 0.004360000  |



|    |              |               |              |
|----|--------------|---------------|--------------|
| 6  | 12.918428000 | -3.410780000  | -3.502599000 |
| 1  | 12.232986000 | -5.375894000  | -2.828513000 |
| 6  | 13.181917000 | -2.212579000  | -2.723320000 |
| 6  | 6.922414000  | -11.403465000 | 2.724658000  |
| 30 | 5.638228000  | -11.742104000 | 0.001437000  |
| 6  | 8.174199000  | -10.973660000 | 3.336922000  |
| 1  | 9.849189000  | -9.865947000  | 2.462231000  |
| 6  | 6.817261000  | -11.437136000 | -2.736032000 |
| 6  | 7.829574000  | -10.745756000 | -3.516708000 |
| 1  | 9.420440000  | -9.404844000  | -2.840627000 |
| 1  | 13.413193000 | -3.804102000  | 4.385303000  |
| 6  | 13.371333000 | -1.117272000  | 3.339413000  |
| 7  | 13.177819000 | 0.429651000   | 1.438052000  |
| 7  | 12.978945000 | 0.487032000   | -1.382707000 |
| 1  | 13.038731000 | -3.497002000  | -4.574529000 |
| 6  | 13.512659000 | -0.928845000  | -3.312862000 |
| 6  | 5.936780000  | -12.103422000 | 3.327685000  |
| 7  | 4.402957000  | -12.456330000 | 1.438478000  |
| 7  | 4.243326000  | -12.246788000 | -1.377433000 |
| 1  | 8.466297000  | -11.179924000 | 4.358933000  |
| 6  | 5.733463000  | -12.200993000 | -3.324823000 |
| 1  | 7.941161000  | -10.810582000 | -4.591072000 |
| 6  | 13.261354000 | 0.199981000   | 2.741552000  |
| 6  | 12.941084000 | 1.808968000   | 1.300501000  |
| 6  | 13.389614000 | 0.278025000   | -2.718350000 |
| 6  | 13.016158000 | 1.794155000   | -1.193477000 |
| 6  | 4.662935000  | -12.471441000 | 2.738910000  |
| 6  | 3.030253000  | -12.734724000 | 1.312946000  |
| 6  | 3.040768000  | -12.758052000 | -1.181989000 |
| 6  | 4.570905000  | -12.532424000 | -2.721779000 |
| 6  | 13.152681000 | 1.426387000   | 3.513718000  |
| 6  | 12.927528000 | 2.415408000   | 2.625263000  |
| 6  | 12.753854000 | 2.450173000   | 0.103736000  |
| 6  | 13.656737000 | 1.573507000   | -3.332320000 |
| 6  | 13.413980000 | 2.510195000   | -2.391879000 |
| 6  | 3.490370000  | -12.829051000 | 3.519589000  |
| 6  | 2.476550000  | -12.964516000 | 2.640970000  |
| 6  | 2.350143000  | -12.773310000 | 0.123507000  |
| 6  | 2.502913000  | -13.368463000 | -2.384227000 |
| 6  | 3.452680000  | -13.240425000 | -3.334043000 |
| 1  | 13.243516000 | 1.496369000   | 4.589696000  |
| 1  | 12.798681000 | 3.470741000   | 2.819658000  |
| 6  | 12.316252000 | 3.804626000   | 0.072590000  |
| 1  | 14.001411000 | 1.717698000   | -4.348600000 |
| 1  | 13.520964000 | 3.582645000   | -2.470619000 |
| 1  | 3.471183000  | -12.956709000 | 4.593949000  |
| 1  | 1.449130000  | -13.231861000 | 2.843523000  |
| 6  | 0.929024000  | -12.858283000 | 0.108994000  |
| 1  | 1.540812000  | -13.854722000 | -2.459349000 |
| 1  | 3.430954000  | -13.597332000 | -4.356059000 |
| 6  | 11.837579000 | 4.923665000   | 0.031255000  |
| 6  | -0.288004000 | -12.818816000 | 0.088989000  |
| 6  | -1.655235000 | -12.715056000 | 0.087278000  |
| 6  | -2.864343000 | -12.570578000 | 0.104296000  |
| 6  | -4.256398000 | -12.272033000 | 0.115044000  |
| 6  | -4.927626000 | -12.130517000 | -1.192939000 |
| 6  | -4.931185000 | -12.151056000 | 1.301959000  |
| 6  | -4.479790000 | -12.794957000 | -2.403466000 |
| 7  | -6.037248000 | -11.439450000 | -1.384836000 |

|    |               |               |              |
|----|---------------|---------------|--------------|
| 7  | -6.247227000  | -11.671140000 | 1.426016000  |
| 6  | -4.428195000  | -12.484382000 | 2.628244000  |
| 6  | -5.392009000  | -12.507907000 | -3.355289000 |
| 1  | -3.602105000  | -13.420331000 | -2.482707000 |
| 6  | -6.394251000  | -11.648761000 | -2.735700000 |
| 30 | -7.349970000  | -10.753568000 | -0.003328000 |
| 6  | -6.516258000  | -11.669563000 | 2.724706000  |
| 6  | -5.416604000  | -12.212991000 | 3.504346000  |
| 1  | -3.454263000  | -12.906915000 | 2.830860000  |
| 1  | -5.417173000  | -12.846456000 | -4.383442000 |
| 6  | -7.488022000  | -11.133556000 | -3.338366000 |
| 7  | -8.574760000  | -10.015028000 | -1.437449000 |
| 7  | -8.495918000  | -9.823496000  | 1.383303000  |
| 6  | -7.725064000  | -11.124944000 | 3.313858000  |
| 1  | -5.424795000  | -12.360606000 | 4.576300000  |
| 6  | -8.447409000  | -10.224004000 | -2.740886000 |
| 6  | -9.503249000  | -8.967847000  | -1.300291000 |
| 6  | -9.539270000  | -9.035313000  | 1.193687000  |
| 6  | -8.589883000  | -10.274449000 | 2.718995000  |
| 6  | -9.336368000  | -9.372489000  | -3.513406000 |
| 6  | -9.967697000  | -8.578273000  | -2.625231000 |
| 6  | -9.886909000  | -8.420634000  | -0.103708000 |
| 6  | -10.347128000 | -8.897919000  | 2.391863000  |
| 6  | -9.768100000  | -9.672858000  | 3.332575000  |
| 1  | -9.447496000  | -9.399775000  | -4.589410000 |
| 1  | -10.710699000 | -7.817908000  | -2.819931000 |
| 6  | -10.670349000 | -7.232238000  | -0.072947000 |
| 1  | -11.251026000 | -8.310882000  | 2.470291000  |
| 1  | -10.096382000 | -9.851541000  | 4.348803000  |
| 6  | -11.244389000 | -6.158982000  | -0.031908000 |
| 6  | -11.838046000 | -4.923576000  | 0.005475000  |
| 6  | -12.317514000 | -3.804863000  | 0.046330000  |
| 6  | -12.755864000 | -2.450609000  | 0.076477000  |
| 6  | -12.993408000 | -1.788465000  | -1.222354000 |
| 6  | -12.966050000 | -1.815055000  | 1.272410000  |
| 6  | -13.368575000 | -2.498889000  | -2.431420000 |
| 7  | -12.951912000 | -0.480566000  | -1.405017000 |
| 7  | -13.206328000 | -0.436465000  | 1.411519000  |
| 6  | -12.977799000 | -2.427462000  | 2.594490000  |
| 6  | -13.592501000 | -1.557889000  | -3.372183000 |
| 1  | -13.474825000 | -3.570890000  | -2.516875000 |
| 6  | -13.336333000 | -0.265359000  | -2.747454000 |
| 30 | -12.988823000 | 0.988383000   | -0.011422000 |
| 6  | -13.315763000 | -0.212782000  | 2.714149000  |
| 6  | -13.221109000 | -1.442620000  | 3.482798000  |
| 1  | -12.851856000 | -3.483561000  | 2.786692000  |
| 1  | -13.917681000 | -1.697290000  | -4.395520000 |
| 6  | -13.446208000 | 0.944175000   | -3.339061000 |
| 7  | -12.985871000 | 2.429548000   | -1.434515000 |
| 7  | -12.732243000 | 2.435011000   | 1.382414000  |
| 6  | -13.439452000 | 1.101713000   | 3.315517000  |
| 1  | -13.332846000 | -1.517542000  | 4.556485000  |
| 6  | -13.125911000 | 2.224874000   | -2.737342000 |
| 6  | -12.539901000 | 3.755897000   | -1.294859000 |
| 6  | -12.574996000 | 3.734099000   | 1.199846000  |
| 6  | -13.146859000 | 2.280614000   | 2.724230000  |
| 6  | -12.845037000 | 3.426137000   | -3.505682000 |
| 6  | -12.456819000 | 4.362894000   | -2.616871000 |
| 6  | -12.237880000 | 4.352496000   | -0.098518000 |

|   |               |               |              |
|---|---------------|---------------|--------------|
| 6 | -12.840151000 | 4.493253000   | 2.408432000  |
| 6 | -13.205373000 | 3.597095000   | 3.348732000  |
| 1 | -12.942543000 | 3.517011000   | -4.579526000 |
| 1 | -12.172243000 | 5.387760000   | -2.808736000 |
| 6 | -11.599729000 | 5.624841000   | -0.067514000 |
| 1 | -12.782982000 | 5.568986000   | 2.493858000  |
| 1 | -13.507251000 | 3.784213000   | 4.371594000  |
| 6 | -10.956664000 | 6.658191000   | -0.025879000 |
| 1 | 7.839226000   | 11.335722000  | 4.380221000  |
| 1 | 13.652564000  | -1.142137000  | 4.388234000  |
| 1 | 6.074435000   | -12.372368000 | 4.370986000  |
| 1 | -7.909705000  | -11.388741000 | 4.351213000  |
| 1 | -13.742162000 | 1.121612000   | 4.358463000  |
| 1 | -5.899238000  | 12.455937000  | 4.370175000  |
| 1 | -7.644192000  | -11.368727000 | -4.387194000 |
| 1 | 5.857233000   | -12.476559000 | -4.368135000 |
| 1 | 13.833976000  | -0.949983000  | -4.350212000 |
| 1 | 7.716461000   | 11.423441000  | -4.360764000 |
| 1 | -6.032930000  | 12.393996000  | -4.370866000 |
| 1 | -13.746852000 | 0.970201000   | -4.382471000 |

**c-P6<sup>+12</sup>** optimized with **M06-2X** - E=-17503.701580au

|    |               |               |              |
|----|---------------|---------------|--------------|
| 6  | -5.053754000  | -12.141921000 | -1.212184000 |
| 6  | -4.625358000  | -12.822232000 | -2.427262000 |
| 6  | -5.542821000  | -12.521407000 | -3.372678000 |
| 6  | -6.525997000  | -11.640213000 | -2.743879000 |
| 7  | -6.153663000  | -11.436619000 | -1.397735000 |
| 1  | -3.760057000  | -13.465361000 | -2.511059000 |
| 1  | -5.584270000  | -12.861879000 | -4.400260000 |
| 6  | -7.616687000  | -11.098600000 | -3.339981000 |
| 6  | -8.565337000  | -10.170510000 | -2.738571000 |
| 6  | -9.458934000  | -9.314095000  | -3.510820000 |
| 7  | -8.685362000  | -9.956479000  | -1.436145000 |
| 6  | -10.084583000 | -8.517437000  | -2.617741000 |
| 1  | -9.576352000  | -9.342878000  | -4.586588000 |
| 6  | -9.610530000  | -8.910353000  | -1.293080000 |
| 1  | -10.830054000 | -7.756954000  | -2.806855000 |
| 6  | -9.984956000  | -8.362899000  | -0.088473000 |
| 6  | -9.622828000  | -8.964414000  | 1.217245000  |
| 6  | -10.409563000 | -8.799427000  | 2.432385000  |
| 7  | -8.578646000  | -9.749859000  | 1.402831000  |
| 6  | -9.807933000  | -9.554436000  | 3.377908000  |
| 1  | -11.313785000 | -8.212272000  | 2.516127000  |
| 6  | -8.639588000  | -10.169358000 | 2.749082000  |
| 1  | -10.112568000 | -9.711716000  | 4.405541000  |
| 6  | -7.751918000  | -11.002962000 | 3.345274000  |
| 6  | -6.551673000  | -11.569223000 | 2.743782000  |
| 6  | -5.437500000  | -12.108340000 | 3.516008000  |
| 7  | -6.309530000  | -11.607765000 | 1.441313000  |
| 6  | -4.473040000  | -12.417749000 | 2.622817000  |
| 1  | -5.423271000  | -12.228006000 | 4.591816000  |
| 6  | -5.006779000  | -12.110741000 | 1.298149000  |
| 1  | -3.500467000  | -12.851566000 | 2.811843000  |
| 6  | -4.363473000  | -12.271578000 | 0.093435000  |
| 30 | -7.459339000  | -10.727288000 | 0.002625000  |
| 6  | -2.973160000  | -12.589030000 | 0.060476000  |
| 6  | -1.762529000  | -12.746317000 | 0.015412000  |

|    |               |              |              |
|----|---------------|--------------|--------------|
| 6  | -10.766585000 | -7.170086000 | -0.055784000 |
| 6  | -11.335492000 | -6.089916000 | -0.011347000 |
| 6  | -13.406704000 | 1.215732000  | 3.352529000  |
| 6  | -13.128402000 | 2.400494000  | 2.754931000  |
| 6  | -13.296932000 | -0.107591000 | 2.752656000  |
| 6  | -13.179870000 | 3.720576000  | 3.382111000  |
| 7  | -12.734654000 | 2.555737000  | 1.408458000  |
| 6  | -13.206117000 | -1.341049000 | 3.526404000  |
| 7  | -13.209542000 | -0.338175000 | 1.450458000  |
| 6  | -12.826870000 | 4.617893000  | 2.435407000  |
| 1  | -13.468240000 | 3.907046000  | 4.409557000  |
| 6  | -12.576586000 | 3.852504000  | 1.221208000  |
| 30 | -13.022423000 | 1.096115000  | 0.010021000  |
| 6  | -12.991723000 | -2.332055000 | 2.634422000  |
| 1  | -13.302324000 | -1.411840000 | 4.602342000  |
| 6  | -12.993272000 | -1.718007000 | 1.308960000  |
| 1  | -12.770504000 | 5.694669000  | 2.517692000  |
| 6  | -12.237141000 | 4.465272000  | -0.085400000 |
| 7  | -12.983837000 | -0.390963000 | -1.388527000 |
| 7  | -12.968727000 | 2.541666000  | -1.430357000 |
| 1  | -12.880645000 | -3.390946000 | 2.824798000  |
| 6  | -12.810936000 | -2.356900000 | 0.104977000  |
| 6  | -12.524802000 | 3.865942000  | -1.289153000 |
| 6  | -11.594383000 | 5.738344000  | -0.054271000 |
| 6  | -13.044455000 | -1.695923000 | -1.201340000 |
| 6  | -13.347245000 | -0.172010000 | -2.734680000 |
| 6  | -13.094437000 | 2.328989000  | -2.732466000 |
| 6  | -12.390165000 | -3.719534000 | 0.073364000  |
| 6  | -12.421691000 | 4.471164000  | -2.614669000 |
| 6  | -10.942755000 | 6.770749000  | -0.010539000 |
| 6  | -13.420077000 | -2.408650000 | -2.415284000 |
| 6  | -13.619007000 | -1.464881000 | -3.361745000 |
| 6  | -13.424230000 | 1.042638000  | -3.332131000 |
| 6  | -12.799353000 | 3.529961000  | -3.506397000 |
| 6  | -11.920642000 | -4.846469000 | 0.029054000  |
| 1  | -12.135322000 | 5.496591000  | -2.805262000 |
| 1  | -13.544406000 | -3.479703000 | -2.497577000 |
| 1  | -13.935321000 | -1.600535000 | -4.388929000 |
| 1  | -12.883176000 | 3.615869000  | -4.582269000 |
| 6  | 0.392936000   | 12.863774000 | -0.092098000 |
| 6  | 1.762927000   | 12.747997000 | -0.093503000 |
| 6  | -0.827654000  | 12.911221000 | -0.110778000 |
| 6  | 2.974084000   | 12.589587000 | -0.114724000 |
| 6  | -2.251764000  | 12.829681000 | -0.122366000 |
| 6  | 4.364328000   | 12.270445000 | -0.128960000 |
| 6  | -2.933775000  | 12.795389000 | 1.193392000  |
| 6  | -2.931581000  | 12.798761000 | -1.317485000 |
| 6  | 5.039962000   | 12.146385000 | 1.184701000  |
| 6  | 5.021126000   | 12.104400000 | -1.325862000 |
| 6  | -2.378462000  | 13.373495000 | 2.410048000  |
| 7  | -4.133709000  | 12.281946000 | 1.388722000  |
| 6  | -2.374656000  | 13.035167000 | -2.647113000 |
| 7  | -4.302116000  | 12.522438000 | -1.444309000 |
| 7  | 6.139098000   | 11.443917000 | 1.385050000  |
| 6  | 4.597105000   | 12.830786000 | 2.392251000  |
| 7  | 6.324856000   | 11.599630000 | -1.452862000 |
| 6  | 4.502122000   | 12.406279000 | -2.657546000 |
| 6  | -3.319096000  | 13.215751000 | 3.367251000  |
| 1  | -1.415735000  | 13.859798000 | 2.487319000  |

|    |               |              |              |
|----|---------------|--------------|--------------|
| 6  | -4.446062000  | 12.523058000 | 2.743833000  |
| 30 | -5.560957000  | 11.823327000 | 0.002115000  |
| 6  | -3.390714000  | 12.905477000 | -3.527169000 |
| 1  | -1.346612000  | 13.304943000 | -2.847523000 |
| 6  | -4.567118000  | 12.546083000 | -2.742726000 |
| 6  | 6.496923000   | 11.654488000 | 2.734038000  |
| 30 | 7.459588000   | 10.727269000 | 0.002227000  |
| 6  | 5.505215000   | 12.536195000 | 3.348574000  |
| 1  | 3.729185000   | 13.471780000 | 2.464159000  |
| 6  | 6.580521000   | 11.554086000 | -2.752553000 |
| 6  | 5.475497000   | 12.091380000 | -3.539046000 |
| 1  | 3.532489000   | 12.841065000 | -2.858899000 |
| 1  | -3.287116000  | 13.541125000 | 4.400026000  |
| 6  | -5.603329000  | 12.163162000 | 3.351627000  |
| 7  | -6.877011000  | 11.246419000 | 1.451983000  |
| 7  | -6.848570000  | 11.067647000 | -1.390681000 |
| 1  | -3.373259000  | 13.039296000 | -4.601284000 |
| 6  | -5.853488000  | 12.196027000 | -3.330780000 |
| 6  | 7.582947000   | 11.118780000 | 3.343844000  |
| 7  | 8.671960000   | 9.966634000  | 1.457434000  |
| 7  | 8.592053000   | 9.740091000  | -1.380715000 |
| 1  | 5.534983000   | 12.881059000 | 4.375086000  |
| 6  | 7.785162000   | 10.981498000 | -3.339011000 |
| 1  | 5.472912000   | 12.206173000 | -4.615479000 |
| 6  | -6.703494000  | 11.417366000 | 2.754748000  |
| 6  | -7.966530000  | 10.372360000 | 1.311652000  |
| 6  | -6.858368000  | 11.511820000 | -2.730397000 |
| 6  | -8.006286000  | 10.464294000 | -1.197380000 |
| 6  | 8.539692000   | 10.189576000 | 2.757207000  |
| 6  | 9.599425000   | 8.920523000  | 1.330144000  |
| 6  | 9.633402000   | 8.954500000  | -1.180352000 |
| 6  | 8.665447000   | 10.149805000 | -2.729335000 |
| 6  | -7.716738000  | 10.711397000 | 3.531325000  |
| 6  | -8.480311000  | 10.044546000 | 2.639152000  |
| 6  | -8.444795000  | 9.912746000  | 0.107033000  |
| 6  | -8.121749000  | 11.109161000 | -3.347143000 |
| 6  | -8.826975000  | 10.450591000 | -2.401066000 |
| 6  | 9.428001000   | 9.340480000  | 3.543499000  |
| 6  | 10.062659000  | 8.538372000  | 2.661759000  |
| 6  | 9.984355000   | 8.363490000  | 0.133081000  |
| 6  | 10.429972000  | 8.778868000  | -2.387558000 |
| 6  | 9.837906000   | 9.528056000  | -3.343667000 |
| 1  | -7.811818000  | 10.743201000 | 4.609192000  |
| 1  | -9.339975000  | 9.416993000  | 2.831392000  |
| 6  | -9.415331000  | 8.867881000  | 0.074383000  |
| 1  | -8.410762000  | 11.330143000 | -4.367554000 |
| 1  | -9.817439000  | 10.023244000 | -2.477017000 |
| 1  | 9.536022000   | 9.377420000  | 4.620007000  |
| 1  | 10.807995000  | 7.780893000  | 2.862942000  |
| 6  | 10.767758000  | 7.171489000  | 0.118494000  |
| 1  | 11.333367000  | 8.188900000  | -2.459314000 |
| 1  | 10.151421000  | 9.677074000  | -4.369846000 |
| 6  | -10.157513000 | 7.898560000  | 0.029881000  |
| 6  | 11.338060000  | 6.091333000  | 0.097110000  |
| 6  | 11.923858000  | 4.847516000  | 0.095232000  |
| 6  | 12.393457000  | 3.719878000  | 0.113545000  |
| 6  | 12.813036000  | 2.356529000  | 0.123851000  |
| 6  | 13.018405000  | 1.706541000  | -1.192489000 |
| 6  | 13.020774000  | 1.707400000  | 1.318373000  |

|    |              |               |              |
|----|--------------|---------------|--------------|
| 6  | 13.366860000 | 2.429701000   | -2.408402000 |
| 7  | 12.955003000 | 0.403116000   | -1.389181000 |
| 7  | 13.239191000 | 0.326339000   | 1.443791000  |
| 6  | 13.048406000 | 2.310416000   | 2.648642000  |
| 6  | 13.546635000 | 1.494008000   | -3.366572000 |
| 1  | 13.487419000 | 3.501605000   | -2.484497000 |
| 6  | 13.289877000 | 0.195703000   | -2.744467000 |
| 30 | 13.022306000 | -1.095785000  | -0.004104000 |
| 6  | 13.353734000 | 0.084791000   | 2.741939000  |
| 6  | 13.280861000 | 1.311937000   | 3.527639000  |
| 1  | 12.943094000 | 3.367825000   | 2.850162000  |
| 1  | 13.840519000 | 1.638411000   | -4.399187000 |
| 6  | 13.355678000 | -1.013857000  | -3.353442000 |
| 7  | 12.939623000 | -2.528981000  | -1.455389000 |
| 7  | 12.762036000 | -2.567156000  | 1.387273000  |
| 6  | 13.473718000 | -1.243610000  | 3.328588000  |
| 1  | 13.400194000 | 1.373792000   | 4.601826000  |
| 6  | 13.039540000 | -2.305469000  | -2.757914000 |
| 6  | 12.499257000 | -3.854612000  | -1.316405000 |
| 6  | 12.599161000 | -3.862268000  | 1.192635000  |
| 6  | 13.182054000 | -2.423191000  | 2.727050000  |
| 6  | 12.730294000 | -3.500277000  | -3.535729000 |
| 6  | 12.370786000 | -4.449065000  | -2.644533000 |
| 6  | 12.234672000 | -4.464033000  | -0.112394000 |
| 6  | 12.872004000 | -4.637695000  | 2.395496000  |
| 6  | 13.244210000 | -3.748370000  | 3.342444000  |
| 1  | 12.793269000 | -3.577313000  | -4.613677000 |
| 1  | 12.081547000 | -5.473167000  | -2.837808000 |
| 6  | 11.592605000 | -5.737418000  | -0.080772000 |
| 1  | 12.815969000 | -5.715046000  | 2.470234000  |
| 1  | 13.552080000 | -3.943444000  | 4.362620000  |
| 6  | 10.941760000 | -6.770328000  | -0.037164000 |
| 6  | 10.157153000 | -7.898603000  | 0.002627000  |
| 6  | 9.415702000  | -8.868509000  | 0.046448000  |
| 6  | 8.445990000  | -9.914172000  | 0.078775000  |
| 6  | 7.988521000  | -10.446403000 | -1.227111000 |
| 6  | 7.985449000  | -10.391908000 | 1.283189000  |
| 6  | 8.791918000  | -10.415170000 | -2.442158000 |
| 7  | 6.827709000  | -11.046102000 | -1.412875000 |
| 7  | 6.898732000  | -11.269144000 | 1.425930000  |
| 6  | 8.518180000  | -10.083806000 | 2.607988000  |
| 6  | 8.072606000  | -11.058838000 | -3.387827000 |
| 1  | 9.781657000  | -9.987590000  | -2.525736000 |
| 6  | 6.817819000  | -11.469807000 | -2.759186000 |
| 30 | 5.561018000  | -11.823646000 | -0.012822000 |
| 6  | 6.744482000  | -11.460351000 | 2.728302000  |
| 6  | 7.768299000  | -10.765136000 | 3.500830000  |
| 1  | 9.379921000  | -9.458209000  | 2.797377000  |
| 1  | 8.346789000  | -11.264728000 | -4.415446000 |
| 6  | 5.803440000  | -12.143376000 | -3.355522000 |
| 7  | 4.280292000  | -12.499232000 | -1.451678000 |
| 7  | 4.155049000  | -12.305197000 | 1.387346000  |
| 6  | 5.654200000  | -12.217250000 | 3.329476000  |
| 1  | 7.879076000  | -10.813265000 | 4.576609000  |
| 6  | 4.525414000  | -12.501169000 | -2.754156000 |
| 6  | 2.911724000  | -12.777203000 | -1.308607000 |
| 6  | 2.952787000  | -12.816826000 | 1.201704000  |
| 6  | 4.488285000  | -12.568719000 | 2.733334000  |
| 6  | 3.336734000  | -12.845870000 | -3.526511000 |

|   |               |               |              |
|---|---------------|---------------|--------------|
| 6 | 2.334118000   | -12.989961000 | -2.633358000 |
| 6 | 2.250548000   | -12.828716000 | -0.103930000 |
| 6 | 2.416902000   | -13.416592000 | 2.416533000  |
| 6 | 3.371802000   | -13.273622000 | 3.361935000  |
| 1 | 3.302661000   | -12.960997000 | -4.602367000 |
| 1 | 1.302661000   | -13.254819000 | -2.822499000 |
| 6 | 0.826723000   | -12.909187000 | -0.071083000 |
| 1 | 1.456375000   | -13.906259000 | 2.500202000  |
| 1 | 3.355943000   | -13.616682000 | 4.389372000  |
| 6 | -0.393164000  | -12.861718000 | -0.026183000 |
| 1 | -13.692251000 | 1.237790000   | 4.401551000  |
| 1 | -5.712111000  | 12.404404000  | 4.406334000  |
| 1 | 7.738028000   | 11.358224000  | 4.393169000  |
| 1 | 13.779938000  | -1.274545000  | 4.371547000  |
| 1 | 5.779197000   | -12.475652000 | 4.378328000  |
| 1 | -7.912626000  | -11.239746000 | 4.394363000  |
| 1 | 13.619864000  | -1.030750000  | -4.408125000 |
| 1 | 7.956040000   | 11.211036000  | -4.388095000 |
| 1 | -5.988115000  | 12.472453000  | -4.373839000 |
| 1 | -13.710284000 | 1.068597000   | -4.380924000 |
| 1 | -7.782890000  | -11.332049000 | -4.388959000 |
| 1 | 5.922466000   | -12.403577000 | -4.404625000 |

**c-P6-T6** optimized with **B3LYP** - E=-23379.854115au

|    |               |               |              |
|----|---------------|---------------|--------------|
| 6  | -11.735155000 | -4.865739000  | 2.025838000  |
| 6  | -12.090888000 | -4.390285000  | 3.339971000  |
| 6  | -11.551050000 | -5.269185000  | 4.231020000  |
| 6  | -10.834990000 | -6.263963000  | 3.460444000  |
| 7  | -10.982353000 | -5.999211000  | 2.116287000  |
| 1  | -12.698362000 | -3.518469000  | 3.540307000  |
| 1  | -11.637654000 | -5.255751000  | 5.307690000  |
| 6  | -10.088636000 | -7.325739000  | 4.005981000  |
| 6  | -9.386375000  | -8.286796000  | 3.252463000  |
| 6  | -8.522997000  | -9.306362000  | 3.810106000  |
| 7  | -9.357937000  | -8.360329000  | 1.876894000  |
| 6  | -7.973269000  | -9.978593000  | 2.759465000  |
| 1  | -8.354691000  | -9.475592000  | 4.863681000  |
| 6  | -8.506666000  | -9.378933000  | 1.561144000  |
| 1  | -7.278386000  | -10.806498000 | 2.782994000  |
| 6  | -8.175788000  | -9.792752000  | 0.244849000  |
| 6  | -8.760332000  | -9.301685000  | -0.951065000 |
| 6  | -8.479376000  | -9.823763000  | -2.266052000 |
| 7  | -9.652325000  | -8.272397000  | -1.027681000 |
| 6  | -9.223719000  | -9.092575000  | -3.142747000 |
| 1  | -7.807092000  | -10.643396000 | -2.478146000 |
| 6  | -9.953002000  | -8.115102000  | -2.362633000 |
| 1  | -9.269117000  | -9.195359000  | -4.217128000 |
| 6  | -10.786670000 | -7.115597000  | -2.900775000 |
| 6  | -11.402385000 | -6.093761000  | -2.153337000 |
| 6  | -12.259077000 | -5.064216000  | -2.701646000 |
| 7  | -11.271765000 | -5.908127000  | -0.793665000 |
| 6  | -12.605130000 | -4.244341000  | -1.669339000 |
| 1  | -12.563988000 | -4.989562000  | -3.735226000 |
| 6  | -11.989444000 | -4.790380000  | -0.485017000 |
| 1  | -13.240059000 | -3.369727000  | -1.691445000 |
| 6  | -12.142112000 | -4.245885000  | 0.817143000  |
| 30 | -10.028142000 | -6.931018000  | 0.519310000  |

|    |               |               |              |
|----|---------------|---------------|--------------|
| 6  | -12.683163000 | -2.946619000  | 0.900272000  |
| 6  | -12.954940000 | -1.751375000  | 0.901336000  |
| 6  | -7.116942000  | -10.713918000 | 0.108775000  |
| 6  | -6.088946000  | -11.368765000 | -0.016821000 |
| 6  | 0.848890000   | -12.425692000 | -4.089506000 |
| 6  | 2.132205000   | -12.304411000 | -3.524658000 |
| 6  | -0.349680000  | -12.520728000 | -3.357192000 |
| 6  | 3.364493000   | -12.204923000 | -4.277284000 |
| 7  | 2.411298000   | -12.253683000 | -2.176101000 |
| 6  | -1.674462000  | -12.518463000 | -3.942237000 |
| 7  | -0.451042000  | -12.557318000 | -1.984297000 |
| 6  | 4.373478000   | -12.058240000 | -3.371876000 |
| 1  | 3.445109000   | -12.255291000 | -5.353314000 |
| 6  | 3.763753000   | -12.106430000 | -2.066559000 |
| 30 | 1.050551000   | -12.136158000 | -0.602678000 |
| 6  | -2.563697000  | -12.535268000 | -2.910101000 |
| 1  | -1.890436000  | -12.493172000 | -5.000334000 |
| 6  | -1.784638000  | -12.563825000 | -1.696427000 |
| 1  | 5.434415000   | -11.961706000 | -3.557468000 |
| 6  | 4.480353000   | -12.037110000 | -0.844368000 |
| 7  | -0.245721000  | -12.746638000 | 0.908966000  |
| 7  | 2.619057000   | -12.482673000 | 0.720025000  |
| 1  | -3.643945000  | -12.537129000 | -2.954517000 |
| 6  | -2.340580000  | -12.585610000 | -0.391334000 |
| 6  | 3.941253000   | -12.301604000 | 0.442125000  |
| 6  | 5.820327000   | -11.602083000 | -0.895301000 |
| 6  | -1.607685000  | -12.736711000 | 0.814748000  |
| 6  | 0.051654000   | -12.910129000 | 2.243811000  |
| 6  | 2.535274000   | -12.727667000 | 2.073541000  |
| 6  | -3.725573000  | -12.348074000 | -0.273821000 |
| 6  | 4.733553000   | -12.443686000 | 1.639321000  |
| 6  | 6.905822000   | -11.033202000 | -0.869117000 |
| 6  | -2.203986000  | -12.889262000 | 2.118634000  |
| 6  | -1.174954000  | -13.005780000 | 3.005592000  |
| 6  | 1.345866000   | -12.924733000 | 2.798033000  |
| 6  | 3.864206000   | -12.731345000 | 2.648153000  |
| 6  | -4.878403000  | -11.950481000 | -0.153528000 |
| 1  | 5.810864000   | -12.365334000 | 1.683441000  |
| 1  | -3.266607000  | -12.914978000 | 2.316246000  |
| 1  | -1.237208000  | -13.136376000 | 4.076112000  |
| 1  | 4.097291000   | -12.937171000 | 3.682619000  |
| 6  | 12.924155000  | 0.396065000   | 0.911402000  |
| 6  | 12.812706000  | 1.740281000   | 0.968761000  |
| 6  | 12.880073000  | -0.824067000  | 0.804685000  |
| 6  | 12.568181000  | 2.941192000   | 0.962764000  |
| 6  | 12.609038000  | -2.193032000  | 0.604570000  |
| 6  | 12.077076000  | 4.259988000   | 0.872399000  |
| 6  | 12.517470000  | -2.637364000  | -0.740580000 |
| 6  | 12.375693000  | -2.990963000  | 1.753378000  |
| 6  | 11.959224000  | 4.810257000   | -0.431040000 |
| 6  | 11.658630000  | 4.888502000   | 2.073196000  |
| 6  | 12.884433000  | -1.845370000  | -1.888225000 |
| 7  | 12.079918000  | -3.870437000  | -1.133603000 |
| 6  | 12.672422000  | -2.576960000  | 3.103005000  |
| 7  | 11.848276000  | -4.247673000  | 1.743746000  |
| 7  | 11.311633000  | 5.970250000   | -0.740978000 |
| 6  | 12.506077000  | 4.203824000   | -1.620386000 |
| 7  | 10.962636000  | 6.061081000   | 2.143554000  |
| 6  | 11.899196000  | 4.364825000   | 3.394755000  |



|    |              |               |              |
|----|--------------|---------------|--------------|
| 6  | 12.677998000 | -2.629225000  | -2.984903000 |
| 1  | 13.261531000 | -0.833018000  | -1.849486000 |
| 6  | 12.171960000 | -3.897966000  | -2.508445000 |
| 30 | 11.028907000 | -5.195267000  | 0.078589000  |
| 6  | 12.322824000 | -3.615385000  | 3.912985000  |
| 1  | 13.115504000 | -1.629642000  | 3.377902000  |
| 6  | 11.777423000 | -4.650305000  | 3.058922000  |
| 6  | 11.423420000 | 6.125525000   | -2.105152000 |
| 30 | 9.999896000  | 6.968376000   | 0.532186000  |
| 6  | 12.181749000 | 5.023553000   | -2.659019000 |
| 1  | 13.068419000 | 3.280958000   | -1.644793000 |
| 6  | 10.755042000 | 6.311341000   | 3.481951000  |
| 6  | 11.346096000 | 5.251365000   | 4.270739000  |
| 1  | 12.430461000 | 3.448397000   | 3.611995000  |
| 1  | 12.847316000 | -2.372953000  | -4.020551000 |
| 6  | 11.789068000 | -4.972078000  | -3.334601000 |
| 7  | 10.891874000 | -6.459113000  | -1.571486000 |
| 7  | 10.655445000 | -6.834397000  | 1.305458000  |
| 1  | 12.428606000 | -3.681701000  | 4.985947000  |
| 6  | 11.231101000 | -5.864603000  | 3.512588000  |
| 6  | 10.837362000 | 7.155108000   | -2.864800000 |
| 7  | 9.633641000  | 8.298696000   | -1.027759000 |
| 7  | 9.316688000  | 8.414315000   | 1.865608000  |
| 1  | 12.420867000 | 4.892110000   | -3.704183000 |
| 6  | 10.031491000 | 7.398326000   | 4.008691000  |
| 1  | 11.331247000 | 5.192293000   | 5.349269000  |
| 6  | 11.199873000 | -6.166413000  | -2.881638000 |
| 6  | 10.275629000 | -7.674792000  | -1.582963000 |
| 6  | 10.688076000 | -6.864549000  | 2.682970000  |
| 6  | 10.010750000 | -7.971492000  | 0.908209000  |
| 6  | 10.007087000 | 8.166694000   | -2.347615000 |
| 6  | 8.817236000  | 9.390459000   | -0.964860000 |
| 6  | 8.538125000  | 9.485438000   | 1.540427000  |
| 6  | 9.369739000  | 8.374818000   | 3.241862000  |
| 6  | 10.794297000 | -7.266076000  | -3.732465000 |
| 6  | 10.200136000 | -8.191254000  | -2.927683000 |
| 6  | 9.777681000  | -8.350321000  | -0.439840000 |
| 6  | 10.030210000 | -8.062875000  | 3.156300000  |
| 6  | 9.603506000  | -8.744736000  | 2.055013000  |
| 6  | 9.412102000  | 9.230529000   | -3.127525000 |
| 6  | 8.656175000  | 9.976152000   | -2.272270000 |
| 6  | 8.228108000  | 9.902825000   | 0.220136000  |
| 6  | 8.085808000  | 10.161956000  | 2.731380000  |
| 6  | 8.620071000  | 9.487090000   | 3.787568000  |
| 1  | 10.951623000 | -7.321567000  | -4.799703000 |
| 1  | 9.774539000  | -9.146688000  | -3.202082000 |
| 6  | 8.913904000  | -9.443857000  | -0.653417000 |
| 1  | 9.908182000  | -8.341007000  | 4.192963000  |
| 1  | 9.075800000  | -9.687262000  | 2.013069000  |
| 1  | 9.566556000  | 9.391844000   | -4.184408000 |
| 1  | 8.070900000  | 10.859203000  | -2.488352000 |
| 6  | 7.200137000  | 10.855502000  | 0.068365000  |
| 1  | 7.469838000  | 11.050412000  | 2.743979000  |
| 1  | 8.526458000  | 9.722426000   | 4.837640000  |
| 6  | 8.010605000  | -10.262357000 | -0.781729000 |
| 6  | 6.176383000  | 11.515797000  | -0.067104000 |
| 6  | 4.962295000  | 12.088869000  | -0.207272000 |
| 6  | 3.799068000  | 12.457540000  | -0.323006000 |
| 6  | 2.405498000  | 12.643116000  | -0.426832000 |

|    |               |              |              |
|----|---------------|--------------|--------------|
| 6  | 1.683104000   | 12.787392000 | 0.785990000  |
| 6  | 1.839391000   | 12.599964000 | -1.727055000 |
| 6  | 2.292927000   | 13.049125000 | 2.066612000  |
| 7  | 0.326628000   | 12.726746000 | 0.907513000  |
| 7  | 0.507187000   | 12.509587000 | -2.004210000 |
| 6  | 2.603593000   | 12.678497000 | -2.947329000 |
| 6  | 1.275419000   | 13.161496000 | 2.966317000  |
| 1  | 3.354689000   | 13.161146000 | 2.236770000  |
| 6  | 0.044009000   | 12.932593000 | 2.240536000  |
| 30 | -0.982364000  | 12.147074000 | -0.598796000 |
| 6  | 0.391428000   | 12.521450000 | -3.377856000 |
| 6  | 1.704929000   | 12.652496000 | -3.972064000 |
| 1  | 3.679303000   | 12.774122000 | -3.000186000 |
| 1  | 1.347157000   | 13.389193000 | 4.019823000  |
| 6  | -1.239862000  | 12.903575000 | 2.816295000  |
| 7  | -2.532888000  | 12.477957000 | 0.746716000  |
| 7  | -2.354587000  | 12.275591000 | -2.160846000 |
| 6  | -0.813932000  | 12.404143000 | -4.095988000 |
| 1  | 1.907585000   | 12.727746000 | -5.030444000 |
| 6  | -2.434366000  | 12.667833000 | 2.107732000  |
| 6  | -3.844894000  | 12.207811000 | 0.487201000  |
| 6  | -3.690240000  | 12.030605000 | -2.027836000 |
| 6  | -2.088692000  | 12.266515000 | -3.512025000 |
| 6  | -3.739959000  | 12.515935000 | 2.713788000  |
| 6  | -4.612479000  | 12.223775000 | 1.708167000  |
| 6  | -4.388292000  | 11.939795000 | -0.796655000 |
| 6  | -4.302938000  | 11.862538000 | -3.322614000 |
| 6  | -3.311789000  | 12.016053000 | -4.245529000 |
| 1  | -3.954765000  | 12.610250000 | 3.768265000  |
| 1  | -5.675943000  | 12.042234000 | 1.775668000  |
| 6  | -5.715473000  | 11.464800000 | -0.835236000 |
| 1  | -5.351808000  | 11.661302000 | -3.491335000 |
| 1  | -3.394740000  | 11.954808000 | -5.320868000 |
| 6  | -6.795374000  | 10.886663000 | -0.804686000 |
| 6  | -7.903883000  | 10.120543000 | -0.722126000 |
| 6  | -8.821457000  | 9.317159000  | -0.603761000 |
| 6  | -9.723849000  | 8.250138000  | -0.415672000 |
| 6  | -10.028741000 | 7.897782000  | 0.925164000  |
| 6  | -10.184036000 | 7.574730000  | -1.574765000 |
| 6  | -9.641583000  | 8.676137000  | 2.076595000  |
| 7  | -10.709255000 | 6.780458000  | 1.312500000  |
| 7  | -10.896934000 | 6.411280000  | -1.576008000 |
| 6  | -9.958323000  | 8.028021000  | -2.924637000 |
| 6  | -10.103721000 | 8.009071000  | 3.171054000  |
| 1  | -9.095007000  | 9.608079000  | 2.040971000  |
| 6  | -10.763809000 | 6.814180000  | 2.688319000  |
| 30 | -11.083264000 | 5.151561000  | 0.071193000  |
| 6  | -11.142502000 | 6.104275000  | -2.896509000 |
| 6  | -10.558774000 | 7.120431000  | -3.746339000 |
| 1  | -9.420537000  | 8.925890000  | -3.196089000 |
| 1  | -9.998232000  | 8.289383000  | 4.208943000  |
| 6  | -11.305251000 | 5.808460000  | 3.512168000  |
| 7  | -11.894165000 | 4.193542000  | 1.730609000  |
| 7  | -12.126954000 | 3.845183000  | -1.162655000 |
| 6  | -11.800800000 | 4.946878000  | -3.356609000 |
| 1  | -10.597472000 | 7.130569000  | -4.825887000 |
| 6  | -11.833355000 | 4.587836000  | 3.050323000  |
| 6  | -12.440621000 | 2.943988000  | 1.724802000  |
| 6  | -12.646332000 | 2.646165000  | -0.773306000 |

|   |               |               |              |
|---|---------------|---------------|--------------|
| 6 | -12.260839000 | 3.902519000   | -2.533131000 |
| 6 | -12.384712000 | 3.546745000   | 3.891243000  |
| 6 | -12.740213000 | 2.518637000   | 3.069184000  |
| 6 | -12.716795000 | 2.176772000   | 0.564516000  |
| 6 | -13.142589000 | 1.917103000   | -1.914813000 |
| 6 | -12.924377000 | 2.705298000   | -3.004694000 |
| 1 | -12.497012000 | 3.603918000   | 4.964100000  |
| 1 | -13.193730000 | 1.573350000   | 3.333727000  |
| 6 | -13.021933000 | 0.812328000   | 0.744954000  |
| 1 | -13.618586000 | 0.947413000   | -1.872451000 |
| 1 | -13.195053000 | 2.503350000   | -4.030757000 |
| 6 | -13.076256000 | -0.408079000  | 0.845944000  |
| 6 | -11.294735000 | 6.046884000   | 4.987846000  |
| 6 | -10.527157000 | 5.241569000   | 5.843264000  |
| 6 | -12.052067000 | 7.087893000   | 5.546910000  |
| 1 | -9.936193000  | 4.434962000   | 5.418275000  |
| 1 | -12.651087000 | 7.713788000   | 4.891787000  |
| 6 | -10.517268000 | 5.468817000   | 7.219599000  |
| 6 | -12.042901000 | 7.316212000   | 6.923101000  |
| 1 | -9.914151000  | 4.836760000   | 7.866247000  |
| 1 | -12.639641000 | 8.123808000   | 7.338693000  |
| 6 | -11.275453000 | 6.507439000   | 7.763997000  |
| 1 | -11.268739000 | 6.685019000   | 8.836031000  |
| 6 | -11.997841000 | 4.809532000   | -4.832073000 |
| 6 | -12.820707000 | 5.708480000   | -5.528165000 |
| 6 | -11.361304000 | 3.786686000   | -5.551960000 |
| 1 | -13.318959000 | 6.501046000   | -4.977383000 |
| 1 | -10.721473000 | 3.087930000   | -5.020219000 |
| 6 | -13.003375000 | 5.586814000   | -6.905838000 |
| 6 | -11.543309000 | 3.664167000   | -6.929641000 |
| 1 | -13.648589000 | 6.288754000   | -7.427389000 |
| 1 | -11.040189000 | 2.867345000   | -7.471268000 |
| 6 | -12.365182000 | 4.564290000   | -7.611075000 |
| 1 | -12.507972000 | 4.469184000   | -8.684123000 |
| 6 | -10.012915000 | -7.429676000  | 5.495400000  |
| 6 | -9.387507000  | -6.430179000  | 6.256559000  |
| 6 | -10.563070000 | -8.535357000  | 6.162068000  |
| 1 | -8.958400000  | -5.571413000  | 5.747703000  |
| 1 | -11.051560000 | -9.311556000  | 5.580130000  |
| 6 | -9.314570000  | -6.531710000  | 7.645976000  |
| 6 | -10.490641000 | -8.638025000  | 7.551455000  |
| 1 | -8.823786000  | -5.749226000  | 8.218912000  |
| 1 | -10.926844000 | -9.498936000  | 8.051035000  |
| 6 | -9.866003000  | -7.636633000  | 8.297944000  |
| 1 | -9.810091000  | -7.716429000  | 9.380228000  |
| 6 | -11.014512000 | -7.130274000  | -4.378104000 |
| 6 | -10.556835000 | -6.080016000  | -5.188693000 |
| 6 | -11.689033000 | -8.201159000  | -4.984798000 |
| 1 | -10.032817000 | -5.247692000  | -4.727019000 |
| 1 | -12.049260000 | -9.016225000  | -4.363797000 |
| 6 | -10.767960000 | -6.098376000  | -6.567497000 |
| 6 | -11.900727000 | -8.220579000  | -6.363527000 |
| 1 | -10.403585000 | -5.277587000  | -7.179798000 |
| 1 | -12.429662000 | -9.055614000  | -6.815147000 |
| 6 | -11.440730000 | -7.169340000  | -7.159438000 |
| 1 | -11.606048000 | -7.184310000  | -8.233344000 |
| 6 | 1.458900000   | -13.144651000 | 4.272758000  |
| 6 | 1.080472000   | -14.370465000 | 4.841514000  |
| 6 | 1.939913000   | -12.131923000 | 5.116660000  |

|   |              |               |              |
|---|--------------|---------------|--------------|
| 1 | 0.709848000  | -15.159863000 | 4.193922000  |
| 1 | 2.231818000  | -11.179523000 | 4.683201000  |
| 6 | 1.182013000  | -14.578698000 | 6.217261000  |
| 6 | 2.041554000  | -12.339294000 | 6.492525000  |
| 1 | 0.889453000  | -15.536219000 | 6.639917000  |
| 1 | 2.413435000  | -11.542706000 | 7.131692000  |
| 6 | 1.662905000  | -13.563692000 | 7.047127000  |
| 1 | 1.742484000  | -13.726020000 | 8.118678000  |
| 6 | 0.745730000  | -12.432617000 | -5.581081000 |
| 6 | 1.101771000  | -11.302526000 | -6.332985000 |
| 6 | 0.285357000  | -13.572422000 | -6.258088000 |
| 1 | 1.455062000  | -10.415291000 | -5.815140000 |
| 1 | 0.010281000  | -14.451703000 | -5.682725000 |
| 6 | 1.001923000  | -11.311650000 | -7.724450000 |
| 6 | 0.185385000  | -13.582511000 | -7.649555000 |
| 1 | 1.278622000  | -10.426058000 | -8.290644000 |
| 1 | -0.168294000 | -14.475832000 | -8.157449000 |
| 6 | 0.543445000  | -12.452107000 | -8.387213000 |
| 1 | 0.465915000  | -12.460035000 | -9.471106000 |
| 6 | 11.201853000 | -6.105464000  | 4.988018000  |
| 6 | 11.952088000 | -7.146804000  | 5.555688000  |
| 6 | 10.422458000 | -5.300619000  | 5.833079000  |
| 1 | 12.559985000 | -7.772054000  | 4.908096000  |
| 1 | 9.837332000  | -4.494224000  | 5.400002000  |
| 6 | 11.924846000 | -7.376236000  | 6.931527000  |
| 6 | 10.394422000 | -5.529569000  | 7.208977000  |
| 1 | 12.516360000 | -8.183878000  | 7.354473000  |
| 1 | 9.782708000  | -4.898189000  | 7.848170000  |
| 6 | 11.145782000 | -6.568371000  | 7.762549000  |
| 1 | 11.124931000 | -6.746779000  | 8.834293000  |
| 6 | 12.006640000 | -4.818566000  | -4.805938000 |
| 6 | 10.919896000 | -4.759146000  | -5.691823000 |
| 6 | 13.305767000 | -4.726301000  | -5.328687000 |
| 1 | 9.911441000  | -4.827414000  | -5.293654000 |
| 1 | 14.151828000 | -4.774467000  | -4.649200000 |
| 6 | 11.125972000 | -4.612401000  | -7.063796000 |
| 6 | 13.512691000 | -4.579965000  | -6.700559000 |
| 1 | 10.272439000 | -4.564843000  | -7.735067000 |
| 1 | 14.525855000 | -4.515424000  | -7.088359000 |
| 6 | 12.423365000 | -4.522377000  | -7.572460000 |
| 1 | 12.584527000 | -4.408675000  | -8.641100000 |
| 6 | 9.944631000  | 7.508264000   | 5.497473000  |
| 6 | 11.094638000 | 7.756905000   | 6.262328000  |
| 6 | 8.716013000  | 7.361191000   | 6.159347000  |
| 1 | 12.048606000 | 7.874833000   | 5.756456000  |
| 1 | 7.822289000  | 7.165955000   | 5.573415000  |
| 6 | 11.017982000 | 7.857235000   | 7.651724000  |
| 6 | 8.638527000  | 7.461198000   | 7.548704000  |
| 1 | 11.918001000 | 8.055463000   | 8.227694000  |
| 1 | 7.679009000  | 7.341466000   | 8.045108000  |
| 6 | 9.789586000  | 7.709644000   | 8.299344000  |
| 1 | 9.729740000  | 7.788289000   | 9.381539000  |
| 6 | 11.103670000 | 7.162321000   | -4.336065000 |
| 6 | 12.400545000 | 7.382615000   | -4.824908000 |
| 6 | 10.066279000 | 6.946504000   | -5.256060000 |
| 1 | 13.207956000 | 7.553220000   | -4.118632000 |
| 1 | 9.060544000  | 6.771872000   | -4.884334000 |
| 6 | 12.653027000 | 7.388153000   | -6.196950000 |
| 6 | 10.317930000 | 6.951567000   | -6.628241000 |

|   |              |              |              |
|---|--------------|--------------|--------------|
| 1 | 13.662660000 | 7.565458000  | -6.557868000 |
| 1 | 9.503048000  | 6.778847000  | -7.326479000 |
| 6 | 11.612473000 | 7.172590000  | -7.103006000 |
| 1 | 11.809086000 | 7.177139000  | -8.171748000 |
| 6 | -1.345695000 | 13.112093000 | 4.292818000  |
| 6 | -0.782005000 | 12.194418000 | 5.192585000  |
| 6 | -2.018223000 | 14.230922000 | 4.808201000  |
| 1 | -0.260834000 | 11.325061000 | 4.801347000  |
| 1 | -2.454542000 | 14.947275000 | 4.118098000  |
| 6 | -0.886102000 | 12.389742000 | 6.569951000  |
| 6 | -2.122898000 | 14.427217000 | 6.185387000  |
| 1 | -0.445767000 | 11.666937000 | 7.251881000  |
| 1 | -2.642797000 | 15.302172000 | 6.566414000  |
| 6 | -1.557296000 | 13.507192000 | 7.070740000  |
| 1 | -1.638448000 | 13.660403000 | 8.143483000  |
| 6 | -0.736711000 | 12.399305000 | -5.588839000 |
| 6 | -1.331955000 | 13.427322000 | -6.336347000 |
| 6 | -0.074838000 | 11.368715000 | -6.273956000 |
| 1 | -1.843434000 | 14.230243000 | -5.813425000 |
| 1 | 0.387368000  | 10.568248000 | -5.702866000 |
| 6 | -1.265882000 | 13.425301000 | -7.729805000 |
| 6 | -0.007959000 | 11.365672000 | -7.667355000 |
| 1 | -1.728141000 | 14.232507000 | -8.291723000 |
| 1 | 0.506479000  | 10.557532000 | -8.180844000 |
| 6 | -0.603734000 | 12.394438000 | -8.399931000 |
| 1 | -0.551801000 | 12.393222000 | -9.485349000 |
| 6 | 1.255819000  | -0.588981000 | 0.000545000  |
| 6 | 0.095633000  | -1.397048000 | -0.014520000 |
| 6 | 1.138227000  | 0.819974000  | 0.010192000  |
| 6 | -1.183673000 | -0.795822000 | 0.003805000  |
| 6 | -0.141186000 | 1.420905000  | -0.011497000 |
| 6 | -1.301555000 | 0.613078000  | -0.002711000 |
| 6 | 0.227028000  | -2.889233000 | -0.068036000 |
| 6 | -0.262334000 | -3.707143000 | 0.960686000  |
| 6 | 0.844481000  | -3.508386000 | -1.164956000 |
| 1 | -0.747483000 | -3.251701000 | 1.818600000  |
| 1 | 1.231965000  | -2.895445000 | -1.973040000 |
| 6 | -0.141498000 | -5.092879000 | 0.894503000  |
| 6 | 0.970054000  | -4.892777000 | -1.231636000 |
| 1 | -0.510011000 | -5.699231000 | 1.717018000  |
| 1 | 1.430329000  | -5.343869000 | -2.105988000 |
| 6 | 0.478065000  | -5.713707000 | -0.203112000 |
| 6 | 2.611485000  | -1.227906000 | 0.007654000  |
| 6 | 3.010094000  | -2.061709000 | 1.062689000  |
| 6 | 3.519249000  | -1.011094000 | -1.039251000 |
| 1 | 2.324127000  | -2.245839000 | 1.883915000  |
| 1 | 3.234275000  | -0.368131000 | -1.866445000 |
| 6 | 4.268134000  | -2.657342000 | 1.071490000  |
| 6 | 4.778294000  | -1.604856000 | -1.032560000 |
| 1 | 4.556927000  | -3.276589000 | 1.915855000  |
| 1 | 5.448571000  | -1.438614000 | -1.870960000 |
| 6 | 5.178778000  | -2.440906000 | 0.023459000  |
| 6 | 2.370977000  | 1.671491000  | 0.059066000  |
| 6 | 3.243522000  | 1.597855000  | 1.155033000  |
| 6 | 2.687349000  | 2.563731000  | -0.975694000 |
| 1 | 3.020267000  | 0.913354000  | 1.967716000  |
| 1 | 2.025962000  | 2.641392000  | -1.833225000 |
| 6 | 4.390216000  | 2.384379000  | 1.214830000  |
| 6 | 3.831921000  | 3.354723000  | -0.916374000 |

|   |              |              |              |
|---|--------------|--------------|--------------|
| 1 | 5.032800000  | 2.322587000  | 2.088396000  |
| 1 | 4.062677000  | 4.019737000  | -1.743725000 |
| 6 | 4.707316000  | 3.280379000  | 0.180115000  |
| 6 | -0.271609000 | 2.913187000  | -0.064215000 |
| 6 | 0.205294000  | 3.729687000  | 0.971269000  |
| 6 | -0.872763000 | 3.533986000  | -1.169137000 |
| 1 | 0.692498000  | 3.273975000  | 1.827911000  |
| 1 | -1.267865000 | 2.920959000  | -1.973482000 |
| 6 | 0.085969000  | 5.115602000  | 0.904933000  |
| 6 | -0.985491000 | 4.919175000  | -1.241676000 |
| 1 | 0.488010000  | 5.722155000  | 1.711367000  |
| 1 | -1.476387000 | 5.367866000  | -2.100387000 |
| 6 | -0.507806000 | 5.739228000  | -0.205515000 |
| 6 | -2.657481000 | 1.251604000  | 0.002127000  |
| 6 | -3.561331000 | 1.039505000  | -1.049078000 |
| 6 | -3.061001000 | 2.079171000  | 1.060215000  |
| 1 | -3.278986000 | 0.387885000  | -1.870387000 |
| 1 | -2.371527000 | 2.273999000  | 1.876024000  |
| 6 | -4.819844000 | 1.634697000  | -1.045240000 |
| 6 | -4.322351000 | 2.667983000  | 1.070944000  |
| 1 | -5.505821000 | 1.431907000  | -1.862606000 |
| 1 | -4.596416000 | 3.321855000  | 1.893825000  |
| 6 | -5.227729000 | 2.459120000  | 0.016941000  |
| 6 | -2.415452000 | -1.648928000 | 0.048835000  |
| 6 | -3.282357000 | -1.587899000 | 1.149849000  |
| 6 | -2.733634000 | -2.533900000 | -0.991457000 |
| 1 | -3.067539000 | -0.895361000 | 1.958007000  |
| 1 | -2.067686000 | -2.614200000 | -1.845226000 |
| 6 | -4.420199000 | -2.386725000 | 1.213481000  |
| 6 | -3.875820000 | -3.328565000 | -0.933688000 |
| 1 | -5.083267000 | -2.298847000 | 2.069222000  |
| 1 | -4.080841000 | -4.022615000 | -1.743706000 |
| 6 | -4.740774000 | -3.274425000 | 0.172456000  |
| 6 | 5.927964000  | 4.121556000  | 0.247981000  |
| 6 | 5.939922000  | 5.445085000  | -0.223006000 |
| 6 | 7.104565000  | 6.199420000  | -0.133542000 |
| 7 | 8.243773000  | 5.720236000  | 0.392498000  |
| 6 | 8.247242000  | 4.456040000  | 0.845937000  |
| 6 | 7.127776000  | 3.633499000  | 0.791997000  |
| 1 | 5.041625000  | 5.897018000  | -0.630809000 |
| 1 | 7.144878000  | 7.225976000  | -0.484017000 |
| 1 | 9.187437000  | 4.107069000  | 1.260767000  |
| 1 | 7.199385000  | 2.611947000  | 1.150785000  |
| 6 | 6.520368000  | -3.074706000 | 0.032124000  |
| 6 | 7.653318000  | -2.410020000 | -0.466316000 |
| 6 | 8.892193000  | -3.040355000 | -0.440542000 |
| 7 | 9.069539000  | -4.277932000 | 0.050551000  |
| 6 | 7.995623000  | -4.925092000 | 0.532302000  |
| 6 | 6.721328000  | -4.369256000 | 0.539789000  |
| 1 | 7.579226000  | -1.397470000 | -0.849258000 |
| 1 | 9.785852000  | -2.551535000 | -0.815650000 |
| 1 | 8.182227000  | -5.923208000 | 0.916128000  |
| 1 | 5.888012000  | -4.953385000 | 0.916329000  |
| 6 | 0.608236000  | -7.189806000 | -0.279603000 |
| 6 | 1.752141000  | -7.799277000 | -0.821738000 |
| 6 | 1.831567000  | -9.185504000 | -0.886115000 |
| 7 | 0.852197000  | -9.991887000 | -0.444919000 |
| 6 | -0.245303000 | -9.423307000 | 0.080654000  |
| 6 | -0.406310000 | -8.045662000 | 0.180042000  |

|   |              |               |              |
|---|--------------|---------------|--------------|
| 1 | 2.587082000  | -7.200500000  | -1.170774000 |
| 1 | 2.701431000  | -9.686038000  | -1.299430000 |
| 1 | -1.013275000 | -10.109681000 | 0.422741000  |
| 1 | -1.328978000 | -7.644639000  | 0.586594000  |
| 6 | -5.953531000 | -4.126658000  | 0.244337000  |
| 6 | -6.712031000 | -4.431923000  | -0.898637000 |
| 6 | -7.844721000 | -5.229584000  | -0.782171000 |
| 7 | -8.259978000 | -5.731668000  | 0.390561000  |
| 6 | -7.545747000 | -5.452468000  | 1.491442000  |
| 6 | -6.400363000 | -4.666005000  | 1.462926000  |
| 1 | -6.439161000 | -4.029808000  | -1.868667000 |
| 1 | -8.459930000 | -5.480601000  | -1.641344000 |
| 1 | -7.917883000 | -5.889731000  | 2.413278000  |
| 1 | -5.847306000 | -4.495342000  | 2.380570000  |
| 6 | -6.572567000 | 3.086204000   | 0.026796000  |
| 6 | -7.182101000 | 3.543301000   | -1.153921000 |
| 6 | -8.445987000 | 4.119552000   | -1.100282000 |
| 7 | -9.128138000 | 4.266259000   | 0.046075000  |
| 6 | -8.558451000 | 3.838345000   | 1.183243000  |
| 6 | -7.299769000 | 3.249856000   | 1.217999000  |
| 1 | -6.666459000 | 3.475557000   | -2.106112000 |
| 1 | -8.943079000 | 4.491828000   | -1.991164000 |
| 1 | -9.153236000 | 3.972161000   | 2.081908000  |
| 1 | -6.901386000 | 2.896964000   | 2.163445000  |
| 6 | -0.622880000 | 7.216339000   | -0.287930000 |
| 6 | -0.484819000 | 7.895389000   | -1.510690000 |
| 6 | -0.598657000 | 9.279813000   | -1.548264000 |
| 7 | -0.836227000 | 10.016789000  | -0.452671000 |
| 6 | -0.971477000 | 9.384902000   | 0.723032000  |
| 6 | -0.874094000 | 8.003725000   | 0.848588000  |
| 1 | -0.265145000 | 7.352852000   | -2.424185000 |
| 1 | -0.491937000 | 9.839158000   | -2.472989000 |
| 1 | -1.172847000 | 10.025199000  | 1.576957000  |
| 1 | -1.019456000 | 7.543819000   | 1.820436000  |

**c-P6-T6** optimized with **CAM-B3LYP** - E=-23379.872159au

|   |               |               |              |
|---|---------------|---------------|--------------|
| 6 | -11.632931000 | -4.972973000  | 1.951895000  |
| 6 | -11.996855000 | -4.496808000  | 3.260867000  |
| 6 | -11.458269000 | -5.364913000  | 4.151029000  |
| 6 | -10.734737000 | -6.355151000  | 3.386518000  |
| 7 | -10.875826000 | -6.095491000  | 2.049428000  |
| 1 | -12.609217000 | -3.627927000  | 3.454593000  |
| 1 | -11.546856000 | -5.349488000  | 5.226822000  |
| 6 | -9.990153000  | -7.405722000  | 3.937673000  |
| 6 | -9.281256000  | -8.356115000  | 3.190255000  |
| 6 | -8.424834000  | -9.374729000  | 3.753219000  |
| 7 | -9.238603000  | -8.424587000  | 1.823279000  |
| 6 | -7.866555000  | -10.039026000 | 2.712243000  |
| 1 | -8.268892000  | -9.546304000  | 4.807616000  |
| 6 | -8.389027000  | -9.437830000  | 1.512994000  |
| 1 | -7.171428000  | -10.865604000 | 2.738325000  |
| 6 | -8.055862000  | -9.852106000  | 0.209354000  |
| 6 | -8.623951000  | -9.362996000  | -0.982174000 |
| 6 | -8.334947000  | -9.887852000  | -2.291525000 |
| 7 | -9.511567000  | -8.339011000  | -1.067847000 |
| 6 | -9.072215000  | -9.165224000  | -3.169005000 |
| 1 | -7.660240000  | -10.706488000 | -2.495554000 |

|    |               |               |              |
|----|---------------|---------------|--------------|
| 6  | -9.804146000  | -8.187666000  | -2.396476000 |
| 1  | -9.113988000  | -9.270924000  | -4.242563000 |
| 6  | -10.633261000 | -7.198293000  | -2.941504000 |
| 6  | -11.255684000 | -6.186095000  | -2.199929000 |
| 6  | -12.108478000 | -5.160536000  | -2.754739000 |
| 7  | -11.140570000 | -6.004361000  | -0.846921000 |
| 6  | -12.468378000 | -4.350520000  | -1.729864000 |
| 1  | -12.399036000 | -5.084028000  | -3.791603000 |
| 6  | -11.865009000 | -4.897335000  | -0.542550000 |
| 1  | -13.105668000 | -3.478688000  | -1.754857000 |
| 6  | -12.041144000 | -4.366106000  | 0.749910000  |
| 30 | -9.908458000  | -7.012129000  | 0.468567000  |
| 6  | -12.611152000 | -3.070988000  | 0.831888000  |
| 6  | -12.910237000 | -1.894031000  | 0.840480000  |
| 6  | -6.992964000  | -10.780987000 | 0.080803000  |
| 6  | -5.975701000  | -11.433470000 | -0.035383000 |
| 6  | 0.993854000   | -12.350049000 | -4.041642000 |
| 6  | 2.264699000   | -12.218594000 | -3.469315000 |
| 6  | -0.199852000  | -12.461994000 | -3.317376000 |
| 6  | 3.497113000   | -12.102481000 | -4.214319000 |
| 7  | 2.534383000   | -12.172747000 | -2.127188000 |
| 6  | -1.518191000  | -12.482999000 | -3.909673000 |
| 7  | -0.307426000  | -12.500349000 | -1.953691000 |
| 6  | 4.494290000   | -11.954465000 | -3.308187000 |
| 1  | 3.581657000   | -12.142651000 | -5.289798000 |
| 6  | 3.878702000   | -12.016430000 | -2.008759000 |
| 30 | 1.172530000   | -12.070341000 | -0.571043000 |
| 6  | -2.407729000  | -12.515483000 | -2.888639000 |
| 1  | -1.726775000  | -12.461688000 | -4.968642000 |
| 6  | -1.635885000  | -12.531885000 | -1.673146000 |
| 1  | 5.554624000   | -11.846000000 | -3.485758000 |
| 6  | 4.584251000   | -11.952987000 | -0.792580000 |
| 7  | -0.118373000  | -12.683587000 | 0.925741000  |
| 7  | 2.726440000   | -12.396424000 | 0.753955000  |
| 1  | -3.486800000  | -12.535733000 | -2.937278000 |
| 6  | -2.194919000  | -12.572823000 | -0.381987000 |
| 6  | 4.042094000   | -12.204450000 | 0.482882000  |
| 6  | 5.933074000   | -11.520300000 | -0.839209000 |
| 6  | -1.473124000  | -12.701289000 | 0.820435000  |
| 6  | 0.170452000   | -12.841558000 | 2.254421000  |
| 6  | 2.637100000   | -12.629464000 | 2.100620000  |
| 6  | -3.593648000  | -12.369559000 | -0.273522000 |
| 6  | 4.826941000   | -12.325240000 | 1.684460000  |
| 6  | 7.011895000   | -10.962925000 | -0.817697000 |
| 6  | -2.075442000  | -12.864559000 | 2.117319000  |
| 6  | -1.056713000  | -12.961340000 | 3.006454000  |
| 6  | 1.453238000   | -12.835909000 | 2.817342000  |
| 6  | 3.959088000   | -12.611122000 | 2.684237000  |
| 6  | -4.746844000  | -12.005867000 | -0.163772000 |
| 1  | 5.902054000   | -12.232130000 | 1.733635000  |
| 1  | -3.138351000  | -12.909938000 | 2.305260000  |
| 1  | -1.122549000  | -13.094113000 | 4.075796000  |
| 1  | 4.185396000   | -12.801839000 | 3.722387000  |
| 6  | 12.921062000  | 0.523734000   | 0.885002000  |
| 6  | 12.796124000  | 1.878831000   | 0.936667000  |
| 6  | 12.869384000  | -0.685045000  | 0.781388000  |
| 6  | 12.524666000  | 3.062329000   | 0.921861000  |
| 6  | 12.590859000  | -2.061544000  | 0.590593000  |
| 6  | 11.998462000  | 4.375357000   | 0.828713000  |



|    |              |              |              |
|----|--------------|--------------|--------------|
| 6  | 12.493447000 | -2.509287000 | -0.741195000 |
| 6  | 12.352248000 | -2.841680000 | 1.736922000  |
| 6  | 11.862859000 | 4.913061000  | -0.466065000 |
| 6  | 11.566182000 | 4.988067000  | 2.019843000  |
| 6  | 12.858823000 | -1.724862000 | -1.891379000 |
| 7  | 12.056305000 | -3.737895000 | -1.126323000 |
| 6  | 12.633588000 | -2.409912000 | 3.081675000  |
| 7  | 11.839146000 | -4.097679000 | 1.738497000  |
| 7  | 11.196897000 | 6.054744000  | -0.777542000 |
| 6  | 12.417617000 | 4.314361000  | -1.652588000 |
| 7  | 10.849042000 | 6.140182000  | 2.091606000  |
| 6  | 11.818644000 | 4.470122000  | 3.338692000  |
| 6  | 12.653193000 | -2.510760000 | -2.976823000 |
| 1  | 13.235199000 | -0.712929000 | -1.857061000 |
| 6  | 12.147917000 | -3.773738000 | -2.492614000 |
| 30 | 11.032629000 | -5.058593000 | 0.090405000  |
| 6  | 12.289884000 | -3.436791000 | 3.895426000  |
| 1  | 13.062975000 | -1.454732000 | 3.347770000  |
| 6  | 11.764029000 | -4.484525000 | 3.049303000  |
| 6  | 11.304782000 | 6.209114000  | -2.133500000 |
| 30 | 9.886710000  | 7.034372000  | 0.489741000  |
| 6  | 12.080500000 | 5.122297000  | -2.686048000 |
| 1  | 12.994787000 | 3.401560000  | -1.674241000 |
| 6  | 10.640398000 | 6.385831000  | 3.422042000  |
| 6  | 11.252878000 | 5.341099000  | 4.209830000  |
| 1  | 12.367861000 | 3.564736000  | 3.553582000  |
| 1  | 12.821983000 | -2.262647000 | -4.013830000 |
| 6  | 11.770887000 | -4.847097000 | -3.309885000 |
| 7  | 10.906896000 | -6.326594000 | -1.541525000 |
| 7  | 10.673542000 | -6.679356000 | 1.322686000  |
| 1  | 12.384983000 | -3.490823000 | 4.969394000  |
| 6  | 11.232712000 | -5.693483000 | 3.512632000  |
| 6  | 10.707685000 | 7.223193000  | -2.892156000 |
| 7  | 9.506929000  | 8.351626000  | -1.060695000 |
| 7  | 9.190307000  | 8.461569000  | 1.816326000  |
| 1  | 12.320674000 | 4.995314000  | -3.730815000 |
| 6  | 9.903222000  | 7.453845000  | 3.949292000  |
| 1  | 11.240685000 | 5.284311000  | 5.287829000  |
| 6  | 11.197838000 | -6.037230000 | -2.847330000 |
| 6  | 10.305358000 | -7.542850000 | -1.541983000 |
| 6  | 10.708450000 | -6.700555000 | 2.691860000  |
| 6  | 10.055188000 | -7.826193000 | 0.933469000  |
| 6  | 9.873159000  | 8.220608000  | -2.373861000 |
| 6  | 8.684939000  | 9.431194000  | -0.995608000 |
| 6  | 8.404686000  | 9.519655000  | 1.491179000  |
| 6  | 9.235427000  | 8.417118000  | 3.184139000  |
| 6  | 10.793494000 | -7.139673000 | -3.690507000 |
| 6  | 10.220027000 | -8.062967000 | -2.882071000 |
| 6  | 9.834493000  | -8.218309000 | -0.401067000 |
| 6  | 10.076104000 | -7.906062000 | 3.173219000  |
| 6  | 9.663921000  | -8.598796000 | 2.083025000  |
| 6  | 9.264247000  | 9.273069000  | -3.153545000 |
| 6  | 8.510762000  | 10.010304000 | -2.301585000 |
| 6  | 8.104463000  | 9.940554000  | 0.181635000  |
| 6  | 7.935671000  | 10.183163000 | 2.680097000  |
| 6  | 8.468033000  | 9.513476000  | 3.730234000  |
| 1  | 10.938525000 | -7.193851000 | -4.758869000 |
| 1  | 9.798769000  | -9.021813000 | -3.147933000 |
| 6  | 8.991635000  | -9.339245000 | -0.605845000 |

|    |               |               |              |
|----|---------------|---------------|--------------|
| 1  | 9.961759000   | -8.178725000  | 4.211493000  |
| 1  | 9.154543000   | -9.550645000  | 2.045612000  |
| 1  | 9.410147000   | 9.429252000   | -4.211720000 |
| 1  | 7.914487000   | 10.885485000  | -2.515675000 |
| 6  | 7.072517000   | 10.900403000  | 0.031176000  |
| 1  | 7.307213000   | 11.061837000  | 2.691319000  |
| 1  | 8.363098000   | 9.739179000   | 4.780653000  |
| 6  | 8.118382000   | -10.173645000 | -0.732174000 |
| 6  | 6.060785000   | 11.559677000  | -0.097350000 |
| 6  | 4.829260000   | 12.125724000  | -0.228826000 |
| 6  | 3.666406000   | 12.460722000  | -0.330501000 |
| 6  | 2.260857000   | 12.618555000  | -0.419837000 |
| 6  | 1.554739000   | 12.737445000  | 0.792418000  |
| 6  | 1.687834000   | 12.564932000  | -1.704465000 |
| 6  | 2.175335000   | 12.988654000  | 2.067360000  |
| 7  | 0.206476000   | 12.665122000  | 0.928032000  |
| 7  | 0.360446000   | 12.464403000  | -1.970314000 |
| 6  | 2.440090000   | 12.649348000  | -2.928980000 |
| 6  | 1.172269000   | 13.082937000  | 2.973120000  |
| 1  | 3.237570000   | 13.104666000  | 2.226368000  |
| 6  | -0.062292000  | 12.854417000  | 2.257706000  |
| 30 | -1.102556000  | 12.085362000  | -0.560470000 |
| 6  | 0.233257000   | 12.478942000  | -3.334557000 |
| 6  | 1.537992000   | 12.618357000  | -3.939815000 |
| 1  | 3.514043000   | 12.751062000  | -2.989309000 |
| 1  | 1.251728000   | 13.297005000  | 4.028228000  |
| 6  | -1.332217000  | 12.812879000  | 2.845507000  |
| 7  | -2.632154000  | 12.390061000  | 0.795192000  |
| 7  | -2.480612000  | 12.206918000  | -2.099855000 |
| 6  | -0.970172000  | 12.358203000  | -4.040821000 |
| 1  | 1.729334000   | 12.693839000  | -4.999588000 |
| 6  | -2.524358000  | 12.575531000  | 2.147388000  |
| 6  | -3.939709000  | 12.121488000  | 0.544401000  |
| 6  | -3.808488000  | 11.961345000  | -1.954274000 |
| 6  | -2.230717000  | 12.211056000  | -3.445297000 |
| 6  | -3.822168000  | 12.420731000  | 2.762641000  |
| 6  | -4.696856000  | 12.131075000  | 1.768778000  |
| 6  | -4.490570000  | 11.868644000  | -0.726942000 |
| 6  | -4.433797000  | 11.803181000  | -3.241341000 |
| 6  | -3.458359000  | 11.966633000  | -4.167679000 |
| 1  | -4.027446000  | 12.512841000  | 3.818508000  |
| 1  | -5.758722000  | 11.947093000  | 1.841995000  |
| 6  | -5.826635000  | 11.395959000  | -0.757655000 |
| 1  | -5.483462000  | 11.601378000  | -3.398869000 |
| 1  | -3.550998000  | 11.916419000  | -5.242105000 |
| 6  | -6.899031000  | 10.827545000  | -0.729116000 |
| 6  | -8.009456000  | 10.043509000  | -0.648601000 |
| 6  | -8.899216000  | 9.225331000   | -0.535026000 |
| 6  | -9.781789000  | 8.129919000   | -0.361033000 |
| 6  | -10.077406000 | 7.756283000   | 0.964118000  |
| 6  | -10.215748000 | 7.462291000   | -1.521476000 |
| 6  | -9.710653000  | 8.528497000   | 2.123064000  |
| 7  | -10.735383000 | 6.627906000   | 1.336055000  |
| 7  | -10.901478000 | 6.290098000   | -1.542204000 |
| 6  | -9.995676000  | 7.938278000   | -2.861657000 |
| 6  | -10.165638000 | 7.846750000   | 3.201620000  |
| 1  | -9.180619000  | 9.469392000   | 2.098090000  |
| 6  | -10.799175000 | 6.647300000   | 2.703071000  |
| 30 | -11.083495000 | 5.020920000   | 0.081056000  |

|   |               |              |              |
|---|---------------|--------------|--------------|
| 6 | -11.137592000 | 5.999350000  | -2.859259000 |
| 6 | -10.574332000 | 7.036612000  | -3.692435000 |
| 1 | -9.474467000  | 8.849502000  | -3.117225000 |
| 1 | -10.073439000 | 8.117554000  | 4.242582000  |
| 6 | -11.327600000 | 5.631914000  | 3.511396000  |
| 7 | -11.885488000 | 4.041372000  | 1.715629000  |
| 7 | -12.095946000 | 3.723430000  | -1.166715000 |
| 6 | -11.769961000 | 4.843306000  | -3.336959000 |
| 1 | -10.612964000 | 7.060437000  | -4.771088000 |
| 6 | -11.834571000 | 4.417401000  | 3.032361000  |
| 6 | -12.414187000 | 2.791200000  | 1.690773000  |
| 6 | -12.597949000 | 2.519023000  | -0.793358000 |
| 6 | -12.215725000 | 3.790049000  | -2.529521000 |
| 6 | -12.372293000 | 3.360371000  | 3.857631000  |
| 6 | -12.710539000 | 2.344515000  | 3.026399000  |
| 6 | -12.681811000 | 2.043034000  | 0.529417000  |
| 6 | -13.067431000 | 1.791713000  | -1.944274000 |
| 6 | -12.851092000 | 2.587781000  | -3.018711000 |
| 1 | -12.484954000 | 3.402622000  | 4.930456000  |
| 1 | -13.150478000 | 1.389648000  | 3.275715000  |
| 6 | -12.987843000 | 0.669268000  | 0.695947000  |
| 1 | -13.525585000 | 0.813906000  | -1.913781000 |
| 1 | -13.103478000 | 2.390379000  | -4.049588000 |
| 6 | -13.046935000 | -0.539971000 | 0.791257000  |
| 6 | -11.329555000 | 5.854103000  | 4.986974000  |
| 6 | -10.552490000 | 5.059886000  | 5.833344000  |
| 6 | -12.109217000 | 6.867492000  | 5.549571000  |
| 1 | -9.942632000  | 4.271183000  | 5.403465000  |
| 1 | -12.717363000 | 7.487046000  | 4.898067000  |
| 6 | -10.554904000 | 5.271137000  | 7.206893000  |
| 6 | -12.112470000 | 7.080666000  | 6.922813000  |
| 1 | -9.942763000  | 4.645620000  | 7.849537000  |
| 1 | -12.727821000 | 7.870137000  | 7.343215000  |
| 6 | -11.335275000 | 6.282919000  | 7.755778000  |
| 1 | -11.338210000 | 6.448821000  | 8.828612000  |
| 6 | -11.955924000 | 4.719649000  | -4.812430000 |
| 6 | -12.796370000 | 5.600494000  | -5.497228000 |
| 6 | -11.291097000 | 3.728189000  | -5.537748000 |
| 1 | -13.317752000 | 6.371908000  | -4.939323000 |
| 1 | -10.635875000 | 3.040556000  | -5.011821000 |
| 6 | -12.968755000 | 5.492102000  | -6.871958000 |
| 6 | -11.462694000 | 3.618096000  | -6.912443000 |
| 1 | -13.629395000 | 6.182374000  | -7.387462000 |
| 1 | -10.936608000 | 2.842565000  | -7.460879000 |
| 6 | -12.302320000 | 4.500396000  | -7.583748000 |
| 1 | -12.437448000 | 4.415066000  | -8.657521000 |
| 6 | -9.927376000  | -7.510916000 | 5.424976000  |
| 6 | -9.308388000  | -6.518204000 | 6.188122000  |
| 6 | -10.484478000 | -8.610472000 | 6.082089000  |
| 1 | -8.873248000  | -5.660551000 | 5.684184000  |
| 1 | -10.969365000 | -9.384361000 | 5.495457000  |
| 6 | -9.248179000  | -6.620268000 | 7.572778000  |
| 6 | -10.424701000 | -8.714532000 | 7.466624000  |
| 1 | -8.761266000  | -5.840168000 | 8.150140000  |
| 1 | -10.866802000 | -9.573993000 | 7.961119000  |
| 6 | -9.806237000  | -7.719613000 | 8.216222000  |
| 1 | -9.760105000  | -7.800387000 | 9.297817000  |
| 6 | -10.851350000 | -7.215563000 | -4.417638000 |
| 6 | -10.385677000 | -6.174195000 | -5.223695000 |

|   |               |               |              |
|---|---------------|---------------|--------------|
| 6 | -11.524494000 | -8.279964000  | -5.022013000 |
| 1 | -9.861321000  | -5.343461000  | -4.761352000 |
| 1 | -11.891509000 | -9.091318000  | -4.401417000 |
| 6 | -10.587902000 | -6.194583000  | -6.598437000 |
| 6 | -11.727220000 | -8.302303000  | -6.396661000 |
| 1 | -10.216955000 | -5.377637000  | -7.209957000 |
| 1 | -12.256302000 | -9.135465000  | -6.848946000 |
| 6 | -11.259422000 | -7.259529000  | -7.189137000 |
| 1 | -11.418246000 | -7.276482000  | -8.262907000 |
| 6 | 1.559475000   | -13.046735000 | 4.291203000  |
| 6 | 1.208387000   | -14.273622000 | 4.858912000  |
| 6 | 2.007022000   | -12.023369000 | 5.129708000  |
| 1 | 0.861894000   | -15.073670000 | 4.212271000  |
| 1 | 2.279585000   | -11.066955000 | 4.694388000  |
| 6 | 1.303415000   | -14.473012000 | 6.231043000  |
| 6 | 2.102881000   | -12.221381000 | 6.501977000  |
| 1 | 1.030613000   | -15.434406000 | 6.655308000  |
| 1 | 2.450617000   | -11.414391000 | 7.139802000  |
| 6 | 1.751119000   | -13.447256000 | 7.056643000  |
| 1 | 1.826128000   | -13.602940000 | 8.128420000  |
| 6 | 0.899653000   | -12.352642000 | -5.531144000 |
| 6 | 1.234136000   | -11.216582000 | -6.271567000 |
| 6 | 0.470656000   | -13.494203000 | -6.212119000 |
| 1 | 1.565272000   | -10.325199000 | -5.747838000 |
| 1 | 0.210986000   | -14.380995000 | -5.642551000 |
| 6 | 1.143809000   | -11.221250000 | -7.658381000 |
| 6 | 0.379501000   | -13.500365000 | -7.598877000 |
| 1 | 1.405075000   | -10.328458000 | -8.218433000 |
| 1 | 0.048256000   | -14.397728000 | -8.112403000 |
| 6 | 0.716078000   | -12.363715000 | -8.326184000 |
| 1 | 0.645507000   | -12.368413000 | -9.409494000 |
| 6 | 11.202451000  | -5.921259000  | 4.987435000  |
| 6 | 11.971704000  | -6.934214000  | 5.564608000  |
| 6 | 10.403752000  | -5.130784000  | 5.816932000  |
| 1 | 12.596384000  | -7.550526000  | 4.925715000  |
| 1 | 9.802609000   | -4.342717000  | 5.374057000  |
| 6 | 11.943862000  | -7.151098000  | 6.937079000  |
| 6 | 10.375098000  | -5.346250000  | 7.189613000  |
| 1 | 12.551449000  | -7.940031000  | 7.369637000  |
| 1 | 9.746900000   | -4.723905000  | 7.819727000  |
| 6 | 11.145310000  | -6.357558000  | 7.753687000  |
| 1 | 11.123937000  | -6.526288000  | 8.825898000  |
| 6 | 11.978969000  | -4.699758000  | -4.780547000 |
| 6 | 10.890977000  | -4.637851000  | -5.654178000 |
| 6 | 13.269087000  | -4.617240000  | -5.309429000 |
| 1 | 9.885771000   | -4.700054000  | -5.248914000 |
| 1 | 14.118904000  | -4.667074000  | -4.635949000 |
| 6 | 11.087082000  | -4.497902000  | -7.022920000 |
| 6 | 13.466761000  | -4.477104000  | -6.677917000 |
| 1 | 10.230055000  | -4.448927000  | -7.687811000 |
| 1 | 14.476469000  | -4.418835000  | -7.072603000 |
| 6 | 12.376079000  | -4.416994000  | -7.538744000 |
| 1 | 12.530211000  | -4.308076000  | -8.607825000 |
| 6 | 9.810336000   | 7.559196000   | 5.435356000  |
| 6 | 10.946480000  | 7.836138000   | 6.199095000  |
| 6 | 8.589729000   | 7.379762000   | 6.090060000  |
| 1 | 11.897668000  | 7.979000000   | 5.696005000  |
| 1 | 7.703506000   | 7.162735000   | 5.501800000  |
| 6 | 10.864401000  | 7.932215000   | 7.583142000  |

|   |              |              |              |
|---|--------------|--------------|--------------|
| 6 | 8.506006000  | 7.475883000  | 7.473982000  |
| 1 | 11.756639000 | 8.152477000  | 8.161151000  |
| 1 | 7.549565000  | 7.331318000  | 7.967271000  |
| 6 | 9.643626000  | 7.752393000  | 8.224685000  |
| 1 | 9.579058000  | 7.828107000  | 9.305738000  |
| 6 | 10.968557000 | 7.230877000  | -4.361663000 |
| 6 | 12.252831000 | 7.476589000  | -4.852742000 |
| 6 | 9.937207000  | 6.990686000  | -5.272326000 |
| 1 | 13.058249000 | 7.666250000  | -4.150197000 |
| 1 | 8.937375000  | 6.796598000  | -4.896587000 |
| 6 | 12.499840000 | 7.482723000  | -6.220368000 |
| 6 | 10.182582000 | 6.996712000  | -6.640238000 |
| 1 | 13.503278000 | 7.679657000  | -6.585081000 |
| 1 | 9.369896000  | 6.805117000  | -7.334370000 |
| 6 | 11.465192000 | 7.242821000  | -7.118242000 |
| 1 | 11.657773000 | 7.248013000  | -8.186624000 |
| 6 | -1.425137000 | 13.011855000 | 4.321563000  |
| 6 | -0.858871000 | 12.090883000 | 5.205933000  |
| 6 | -2.086924000 | 14.124420000 | 4.846371000  |
| 1 | -0.343181000 | 11.223589000 | 4.805095000  |
| 1 | -2.527184000 | 14.845386000 | 4.164790000  |
| 6 | -0.949961000 | 12.276966000 | 6.580128000  |
| 6 | -2.179394000 | 14.311830000 | 6.220278000  |
| 1 | -0.505674000 | 11.549865000 | 7.253099000  |
| 1 | -2.693623000 | 15.184588000 | 6.610809000  |
| 6 | -1.611107000 | 13.388505000 | 7.091365000  |
| 1 | -1.682629000 | 13.535114000 | 8.164628000  |
| 6 | -0.907618000 | 12.364536000 | -5.531748000 |
| 6 | -1.503888000 | 13.395957000 | -6.261160000 |
| 6 | -0.258482000 | 11.341903000 | -6.227377000 |
| 1 | -2.007964000 | 14.195274000 | -5.727178000 |
| 1 | 0.206768000  | 10.536269000 | -5.667604000 |
| 6 | -1.451667000 | 13.405085000 | -7.649842000 |
| 6 | -0.204692000 | 11.349608000 | -7.616014000 |
| 1 | -1.916810000 | 14.217026000 | -8.200336000 |
| 1 | 0.302351000  | 10.545232000 | -8.140295000 |
| 6 | -0.801760000 | 12.381803000 | -8.331584000 |
| 1 | -0.760209000 | 12.389156000 | -9.416349000 |
| 6 | 1.255731000  | -0.573070000 | 0.001195000  |
| 6 | 0.109862000  | -1.388977000 | -0.012044000 |
| 6 | 1.124275000  | 0.827456000  | 0.009077000  |
| 6 | -1.169234000 | -0.804023000 | 0.004987000  |
| 6 | -0.154893000 | 1.412326000  | -0.010114000 |
| 6 | -1.301154000 | 0.596588000  | -0.000836000 |
| 6 | 0.256782000  | -2.877953000 | -0.061602000 |
| 6 | -0.211109000 | -3.692361000 | 0.970841000  |
| 6 | 0.866977000  | -3.490487000 | -1.157796000 |
| 1 | -0.693314000 | -3.239309000 | 1.830896000  |
| 1 | 1.239997000  | -2.876706000 | -1.971179000 |
| 6 | -0.076336000 | -5.072427000 | 0.908644000  |
| 6 | 1.006978000  | -4.869111000 | -1.220251000 |
| 1 | -0.432519000 | -5.680862000 | 1.734021000  |
| 1 | 1.466290000  | -5.319425000 | -2.094535000 |
| 6 | 0.536216000  | -5.685277000 | -0.188013000 |
| 6 | 2.616239000  | -1.197254000 | 0.008750000  |
| 6 | 3.028368000  | -2.003339000 | 1.071188000  |
| 6 | 3.508469000  | -0.990841000 | -1.044609000 |
| 1 | 2.350465000  | -2.180122000 | 1.899911000  |
| 1 | 3.211172000  | -0.365231000 | -1.879961000 |

|   |              |              |              |
|---|--------------|--------------|--------------|
| 6 | 4.288486000  | -2.583784000 | 1.081085000  |
| 6 | 4.769327000  | -1.570033000 | -1.037073000 |
| 1 | 4.589889000  | -3.186749000 | 1.931767000  |
| 1 | 5.433067000  | -1.410703000 | -1.880965000 |
| 6 | 5.182501000  | -2.377662000 | 0.026452000  |
| 6 | 2.347019000  | 1.690322000  | 0.052189000  |
| 6 | 3.212987000  | 1.635949000  | 1.145995000  |
| 6 | 2.654573000  | 2.570116000  | -0.986880000 |
| 1 | 2.995167000  | 0.957524000  | 1.964372000  |
| 1 | 1.993911000  | 2.633369000  | -1.845366000 |
| 6 | 4.348526000  | 2.431036000  | 1.199488000  |
| 6 | 3.787506000  | 3.370244000  | -0.933516000 |
| 1 | 4.992720000  | 2.382704000  | 2.071755000  |
| 1 | 4.012731000  | 4.031870000  | -1.764080000 |
| 6 | 4.655531000  | 3.314000000  | 0.160504000  |
| 6 | -0.299651000 | 2.901530000  | -0.059581000 |
| 6 | 0.162238000  | 3.714674000  | 0.976435000  |
| 6 | -0.898597000 | 3.516205000  | -1.160705000 |
| 1 | 0.648784000  | 3.261386000  | 1.833929000  |
| 1 | -1.282562000 | 2.902498000  | -1.969054000 |
| 6 | 0.030727000  | 5.095026000  | 0.913795000  |
| 6 | -1.025386000 | 4.895850000  | -1.228454000 |
| 1 | 0.421065000  | 5.703212000  | 1.723646000  |
| 1 | -1.514822000 | 5.343254000  | -2.087643000 |
| 6 | -0.562148000 | 5.711368000  | -0.191983000 |
| 6 | -2.662012000 | 1.220140000  | 0.005426000  |
| 6 | -3.555325000 | 1.009172000  | -1.046175000 |
| 6 | -3.074414000 | 2.029455000  | 1.065407000  |
| 1 | -3.263767000 | 0.369122000  | -1.872521000 |
| 1 | -2.390273000 | 2.222874000  | 1.885204000  |
| 6 | -4.816015000 | 1.588877000  | -1.040384000 |
| 6 | -4.337131000 | 2.604357000  | 1.076904000  |
| 1 | -5.497120000 | 1.388736000  | -1.861388000 |
| 1 | -4.621671000 | 3.246378000  | 1.904465000  |
| 6 | -5.231246000 | 2.395548000  | 0.022964000  |
| 6 | -2.390031000 | -1.669751000 | 0.045818000  |
| 6 | -3.250676000 | -1.628065000 | 1.144177000  |
| 6 | -2.698109000 | -2.543961000 | -0.997713000 |
| 1 | -3.041569000 | -0.941901000 | 1.958404000  |
| 1 | -2.033663000 | -2.608564000 | -1.853179000 |
| 6 | -4.376585000 | -2.436397000 | 1.201528000  |
| 6 | -3.827452000 | -3.349193000 | -0.945383000 |
| 1 | -5.038449000 | -2.365920000 | 2.058792000  |
| 1 | -4.028110000 | -4.036571000 | -1.761085000 |
| 6 | -4.685911000 | -3.312700000 | 0.157287000  |
| 6 | 5.867623000  | 4.166737000  | 0.222033000  |
| 6 | 5.857798000  | 5.487809000  | -0.233781000 |
| 6 | 7.011173000  | 6.250736000  | -0.150131000 |
| 7 | 8.155801000  | 5.779045000  | 0.354595000  |
| 6 | 8.179043000  | 4.516177000  | 0.792515000  |
| 6 | 7.071416000  | 3.685867000  | 0.744298000  |
| 1 | 4.950724000  | 5.932030000  | -0.628053000 |
| 1 | 7.035179000  | 7.280781000  | -0.490308000 |
| 1 | 9.127028000  | 4.171932000  | 1.192181000  |
| 1 | 7.155495000  | 2.662945000  | 1.093691000  |
| 6 | 6.529966000  | -2.997537000 | 0.036449000  |
| 6 | 7.647795000  | -2.327247000 | -0.468059000 |
| 6 | 8.888498000  | -2.942589000 | -0.440412000 |
| 7 | 9.077791000  | -4.168485000 | 0.058543000  |

|   |              |               |              |
|---|--------------|---------------|--------------|
| 6 | 8.017088000  | -4.820198000  | 0.546154000  |
| 6 | 6.741891000  | -4.279334000  | 0.551793000  |
| 1 | 7.561282000  | -1.320349000  | -0.860608000 |
| 1 | 9.775007000  | -2.447645000  | -0.823184000 |
| 1 | 8.213593000  | -5.812331000  | 0.939219000  |
| 1 | 5.915868000  | -4.866723000  | 0.936609000  |
| 6 | 0.682189000  | -7.159419000  | -0.260455000 |
| 6 | 1.833629000  | -7.752480000  | -0.785638000 |
| 6 | 1.927732000  | -9.132840000  | -0.846650000 |
| 7 | 0.954992000  | -9.943910000  | -0.418417000 |
| 6 | -0.149895000 | -9.389496000  | 0.090683000  |
| 6 | -0.325188000 | -8.018468000  | 0.186473000  |
| 1 | 2.664097000  | -7.144934000  | -1.127351000 |
| 1 | 2.807622000  | -9.623599000  | -1.249114000 |
| 1 | -0.915266000 | -10.082113000 | 0.424616000  |
| 1 | -1.254477000 | -7.625383000  | 0.583225000  |
| 6 | -5.889255000 | -4.177796000  | 0.222214000  |
| 6 | -6.647530000 | -4.466577000  | -0.916208000 |
| 6 | -7.766764000 | -5.275337000  | -0.807332000 |
| 7 | -8.165554000 | -5.800879000  | 0.353729000  |
| 6 | -7.450630000 | -5.536172000  | 1.450221000  |
| 6 | -6.317839000 | -4.740174000  | 1.428449000  |
| 1 | -6.384187000 | -4.044972000  | -1.879535000 |
| 1 | -8.384406000 | -5.516037000  | -1.667115000 |
| 1 | -7.810903000 | -5.993045000  | 2.366735000  |
| 1 | -5.761133000 | -4.578411000  | 2.344411000  |
| 6 | -6.581595000 | 3.009315000   | 0.034113000  |
| 6 | -7.182896000 | 3.476885000   | -1.138038000 |
| 6 | -8.447724000 | 4.038558000   | -1.083515000 |
| 7 | -9.134237000 | 4.159933000   | 0.055963000  |
| 6 | -8.571260000 | 3.721069000   | 1.184971000  |
| 6 | -7.312337000 | 3.145124000   | 1.218038000  |
| 1 | -6.661224000 | 3.427149000   | -2.086991000 |
| 1 | -8.941828000 | 4.419335000   | -1.971935000 |
| 1 | -9.171247000 | 3.835186000   | 2.082319000  |
| 1 | -6.915572000 | 2.782209000   | 2.159285000  |
| 6 | -0.692329000 | 7.186961000   | -0.269579000 |
| 6 | -0.547812000 | 7.867215000   | -1.482512000 |
| 6 | -0.676666000 | 9.245349000   | -1.515750000 |
| 7 | -0.933892000 | 9.970850000   | -0.424493000 |
| 6 | -1.074794000 | 9.336336000   | 0.742098000  |
| 6 | -0.964139000 | 7.960824000   | 0.862495000  |
| 1 | -0.313537000 | 7.330544000   | -2.394731000 |
| 1 | -0.565997000 | 9.808270000   | -2.437301000 |
| 1 | -1.292126000 | 9.969463000   | 1.596883000  |
| 1 | -1.113514000 | 7.495061000   | 1.829898000  |

**c-P6-T6** optimized with **M06-2X** - E=-23380.884725au

|   |               |              |              |
|---|---------------|--------------|--------------|
| 6 | -12.798195000 | -0.647914000 | -1.392484000 |
| 6 | -13.018592000 | -1.311834000 | -2.654703000 |
| 6 | -12.957747000 | -0.350130000 | -3.610733000 |
| 6 | -12.664725000 | 0.896361000  | -2.932857000 |
| 7 | -12.592430000 | 0.678402000  | -1.584344000 |
| 1 | -13.224401000 | -2.366755000 | -2.770997000 |
| 1 | -13.112594000 | -0.461460000 | -4.674294000 |
| 6 | -12.476730000 | 2.134871000  | -3.570591000 |

|    |               |              |              |
|----|---------------|--------------|--------------|
| 6  | -12.201567000 | 3.345074000  | -2.908082000 |
| 6  | -11.895591000 | 4.598303000  | -3.567129000 |
| 7  | -12.119623000 | 3.507749000  | -1.552686000 |
| 6  | -11.623979000 | 5.499830000  | -2.588874000 |
| 1  | -11.879925000 | 4.754812000  | -4.636189000 |
| 6  | -11.773678000 | 4.801396000  | -1.335175000 |
| 1  | -11.354190000 | 6.541849000  | -2.689042000 |
| 6  | -11.583621000 | 5.394018000  | -0.066710000 |
| 6  | -11.817246000 | 4.782197000  | 1.185132000  |
| 6  | -11.708000000 | 5.461676000  | 2.453784000  |
| 7  | -12.168650000 | 3.485288000  | 1.371443000  |
| 6  | -12.007730000 | 4.544740000  | 3.408699000  |
| 1  | -11.442062000 | 6.501992000  | 2.578460000  |
| 6  | -12.289721000 | 3.301178000  | 2.720742000  |
| 1  | -12.024264000 | 4.684168000  | 4.480087000  |
| 6  | -12.579505000 | 2.080466000  | 3.356603000  |
| 6  | -12.742931000 | 0.850774000  | 2.695052000  |
| 6  | -13.055327000 | -0.406176000 | 3.343699000  |
| 7  | -12.627466000 | 0.653533000  | 1.345922000  |
| 6  | -13.087339000 | -1.352693000 | 2.371031000  |
| 1  | -13.242758000 | -0.534239000 | 4.400099000  |
| 6  | -12.829460000 | -0.669267000 | 1.126648000  |
| 1  | -13.297484000 | -2.408968000 | 2.464621000  |
| 6  | -12.835343000 | -1.297617000 | -0.138757000 |
| 30 | -12.019648000 | 2.019248000  | -0.100118000 |
| 6  | -12.798996000 | -2.716618000 | -0.147862000 |
| 6  | -12.560726000 | -3.911370000 | -0.143677000 |
| 6  | -11.021725000 | 6.697698000  | -0.046938000 |
| 6  | -10.384450000 | 7.735523000  | -0.027463000 |
| 6  | -4.442927000  | 11.925125000 | 3.548819000  |
| 6  | -3.241803000  | 12.300809000 | 2.924067000  |
| 6  | -5.583478000  | 11.447817000 | 2.879377000  |
| 6  | -2.074736000  | 12.811974000 | 3.612846000  |
| 7  | -2.993050000  | 12.248276000 | 1.579481000  |
| 6  | -6.774013000  | 10.947431000 | 3.536982000  |
| 7  | -5.717778000  | 11.319602000 | 1.525425000  |
| 6  | -1.123182000  | 13.028797000 | 2.668692000  |
| 1  | -2.008054000  | 12.996618000 | 4.675369000  |
| 6  | -1.721320000  | 12.686868000 | 1.401362000  |
| 30 | -4.205297000  | 11.433365000 | 0.095281000  |
| 6  | -7.605351000  | 10.505688000 | 2.559643000  |
| 1  | -6.934574000  | 10.924087000 | 4.605214000  |
| 6  | -6.930018000  | 10.750744000 | 1.307883000  |
| 1  | -0.122711000  | 13.418468000 | 2.795659000  |
| 6  | -1.077637000  | 12.833089000 | 0.152097000  |
| 7  | -5.667523000  | 11.317393000 | -1.383870000 |
| 7  | -2.959379000  | 12.292395000 | -1.336298000 |
| 1  | -8.586000000  | 10.061490000 | 2.657863000  |
| 6  | -7.467242000  | 10.434049000 | 0.040435000  |
| 6  | -1.691936000  | 12.718188000 | -1.115238000 |
| 6  | 0.326914000   | 13.036611000 | 0.168722000  |
| 6  | -6.890371000  | 10.754114000 | -1.209508000 |
| 6  | -5.490289000  | 11.461358000 | -2.731812000 |
| 6  | -3.164704000  | 12.357236000 | -2.687148000 |
| 6  | -8.638658000  | 9.632080000  | 0.018542000  |
| 6  | -1.056106000  | 13.082122000 | -2.359067000 |
| 6  | 1.544977000   | 13.007021000 | 0.168770000  |
| 6  | -7.521440000  | 10.515640000 | -2.484408000 |
| 6  | -6.656073000  | 10.962702000 | -3.431077000 |



|    |              |              |              |
|----|--------------|--------------|--------------|
| 6  | -4.335962000 | 11.966862000 | -3.356522000 |
| 6  | -1.978161000 | 12.880615000 | -3.334006000 |
| 6  | -9.522806000 | 8.794489000  | -0.003846000 |
| 1  | -0.051571000 | 13.471104000 | -2.450070000 |
| 1  | -8.499627000 | 10.075482000 | -2.618976000 |
| 1  | -6.782490000 | 10.948900000 | -4.504109000 |
| 1  | -1.879225000 | 13.078593000 | -4.391579000 |
| 6  | 11.956669000 | 5.137594000  | -0.147770000 |
| 6  | 12.430666000 | 3.857187000  | -0.166489000 |
| 6  | 11.383390000 | 6.212189000  | -0.121374000 |
| 6  | 12.695593000 | 2.668146000  | -0.170812000 |
| 6  | 10.525307000 | 7.342265000  | -0.083013000 |
| 6  | 12.788052000 | 1.251448000  | -0.164942000 |
| 6  | 10.108866000 | 7.786131000  | 1.192103000  |
| 6  | 10.094453000 | 7.862543000  | -1.323845000 |
| 6  | 12.820418000 | 0.618149000  | 1.097510000  |
| 6  | 12.737357000 | 0.601596000  | -1.418728000 |
| 6  | 10.653450000 | 7.307998000  | 2.439469000  |
| 7  | 9.155041000  | 8.725340000  | 1.420627000  |
| 6  | 10.684115000 | 7.520191000  | -2.596188000 |
| 7  | 9.087527000  | 8.753872000  | -1.491342000 |
| 7  | 12.702596000 | -0.716546000 | 1.308281000  |
| 6  | 12.981399000 | 1.315749000  | 2.350827000  |
| 7  | 12.602701000 | -0.737084000 | -1.599838000 |
| 6  | 12.812722000 | 1.277149000  | -2.691108000 |
| 6  | 10.019027000 | 7.994926000  | 3.424489000  |
| 1  | 11.426198000 | 6.557564000  | 2.530979000  |
| 6  | 9.077555000  | 8.884238000  | 2.776955000  |
| 30 | 7.773949000  | 9.374177000  | 0.003458000  |
| 6  | 10.014319000 | 8.236557000  | -3.534079000 |
| 1  | 11.518156000 | 6.845515000  | -2.730384000 |
| 6  | 8.990656000  | 8.987652000  | -2.834983000 |
| 6  | 12.778839000 | -0.907021000 | 2.659852000  |
| 30 | 12.009805000 | -2.073611000 | -0.115624000 |
| 6  | 12.964252000 | 0.368486000  | 3.322229000  |
| 1  | 13.098343000 | 2.385452000  | 2.453951000  |
| 6  | 12.599663000 | -0.951965000 | -2.950263000 |
| 6  | 12.735200000 | 0.312143000  | -3.643631000 |
| 1  | 12.921488000 | 2.344983000  | -2.820251000 |
| 1  | 10.163112000 | 7.907725000  | 4.491822000  |
| 6  | 8.196094000  | 9.746911000  | 3.452306000  |
| 7  | 6.956334000  | 10.580909000 | 1.491855000  |
| 7  | 6.886777000  | 10.607395000 | -1.420003000 |
| 1  | 10.195658000 | 8.269385000  | -4.598748000 |
| 6  | 8.033873000  | 9.808618000  | -3.454162000 |
| 6  | 12.636223000 | -2.137564000 | 3.323766000  |
| 7  | 12.149470000 | -3.541987000 | 1.354949000  |
| 7  | 12.098368000 | -3.571937000 | -1.560839000 |
| 1  | 13.051300000 | 0.511259000  | 4.389705000  |
| 6  | 12.441094000 | -2.198772000 | -3.580663000 |
| 1  | 12.755919000 | 0.436936000  | -4.716747000 |
| 6  | 7.217967000  | 10.542641000 | 2.833263000  |
| 6  | 5.906519000  | 11.421689000 | 1.324895000  |
| 6  | 7.041410000  | 10.539748000 | -2.777292000 |
| 6  | 5.801598000  | 11.390766000 | -1.189788000 |
| 6  | 12.349912000 | -3.362002000 | 2.696400000  |
| 6  | 11.897752000 | -4.863085000 | 1.172997000  |
| 6  | 11.844835000 | -4.885639000 | -1.343209000 |
| 6  | 12.216040000 | -3.414767000 | -2.914304000 |

|    |              |               |              |
|----|--------------|---------------|--------------|
| 6  | 6.312865000  | 11.434172000  | 3.530743000  |
| 6  | 5.483745000  | 11.961795000  | 2.594864000  |
| 6  | 5.307673000  | 11.742842000  | 0.086502000  |
| 6  | 5.997934000  | 11.307776000  | -3.423552000 |
| 6  | 5.224206000  | 11.829647000  | -2.436752000 |
| 6  | 12.232544000 | -4.633746000  | 3.379000000  |
| 6  | 11.929287000 | -5.561294000  | 2.434714000  |
| 6  | 11.675899000 | -5.486135000  | -0.075751000 |
| 6  | 11.807457000 | -5.607655000  | -2.592516000 |
| 6  | 12.060931000 | -4.698941000  | -3.567879000 |
| 1  | 6.326457000  | 11.632286000  | 4.592838000  |
| 1  | 4.679742000  | 12.672139000  | 2.728501000  |
| 6  | 4.048360000  | 12.396554000  | 0.128774000  |
| 1  | 5.875602000  | 11.420731000  | -4.491197000 |
| 1  | 4.352449000  | 12.462490000  | -2.527161000 |
| 1  | 12.384689000 | -4.790512000  | 4.437202000  |
| 1  | 11.776855000 | -6.624554000  | 2.557317000  |
| 6  | 11.161205000 | -6.808754000  | -0.051476000 |
| 1  | 11.642103000 | -6.671781000  | -2.687488000 |
| 1  | 12.150817000 | -4.873791000  | -4.630328000 |
| 6  | 2.890433000  | 12.774704000  | 0.153729000  |
| 6  | 10.533117000 | -7.852430000  | -0.025344000 |
| 6  | 9.661249000  | -8.902769000  | 0.006854000  |
| 6  | 8.749929000  | -9.710935000  | 0.034600000  |
| 6  | 7.543912000  | -10.458810000 | 0.064499000  |
| 6  | 6.974148000  | -10.801869000 | -1.181894000 |
| 6  | 6.988234000  | -10.722817000 | 1.336434000  |
| 6  | 7.670592000  | -10.710901000 | -2.442677000 |
| 7  | 5.725353000  | -11.296381000 | -1.365094000 |
| 7  | 5.741678000  | -11.204996000 | 1.564019000  |
| 6  | 7.698589000  | -10.554914000 | 2.581188000  |
| 6  | 6.817096000  | -11.180197000 | -3.388016000 |
| 1  | 8.687552000  | -10.364853000 | -2.564172000 |
| 6  | 5.585268000  | -11.523645000 | -2.707036000 |
| 30 | 4.266801000  | -11.416540000 | 0.112424000  |
| 6  | 5.617638000  | -11.351907000 | 2.919015000  |
| 6  | 6.856407000  | -10.966089000 | 3.563360000  |
| 1  | 8.716841000  | -10.202677000 | 2.669711000  |
| 1  | 7.001143000  | -11.302114000 | -4.445728000 |
| 6  | 4.425055000  | -12.006558000 | -3.335861000 |
| 7  | 3.038953000  | -12.299481000 | -1.316693000 |
| 7  | 3.059089000  | -12.220275000 | 1.607135000  |
| 6  | 4.465554000  | -11.798946000 | 3.588887000  |
| 1  | 7.053058000  | -11.023945000 | 4.624269000  |
| 6  | 3.232470000  | -12.343921000 | -2.669421000 |
| 6  | 1.741926000  | -12.631448000 | -1.096837000 |
| 6  | 1.759426000  | -12.563054000 | 1.422980000  |
| 6  | 3.267471000  | -12.180998000 | 2.957456000  |
| 6  | 1.998595000  | -12.726800000 | -3.324478000 |
| 6  | 1.072168000  | -12.897991000 | -2.346727000 |
| 6  | 1.122285000  | -12.709358000 | 0.170593000  |
| 6  | 1.104409000  | -12.755021000 | 2.694466000  |
| 6  | 2.041725000  | -12.524771000 | 3.649133000  |
| 1  | 1.864375000  | -12.833684000 | -4.391330000 |
| 1  | 0.034113000  | -13.183232000 | -2.444721000 |
| 6  | -0.289359000 | -12.860932000 | 0.182072000  |
| 1  | 0.067583000  | -13.033479000 | 2.821203000  |
| 1  | 1.919762000  | -12.566508000 | 4.721973000  |
| 6  | -1.506277000 | -12.811775000 | 0.177586000  |

|    |               |               |              |
|----|---------------|---------------|--------------|
| 6  | -2.851892000  | -12.581006000 | 0.161250000  |
| 6  | -4.015783000  | -12.222871000 | 0.138795000  |
| 6  | -5.297266000  | -11.612581000 | 0.106668000  |
| 6  | -5.835911000  | -11.329381000 | -1.168428000 |
| 6  | -5.870446000  | -11.268292000 | 1.351238000  |
| 6  | -5.269108000  | -11.795690000 | -2.411093000 |
| 7  | -6.944852000  | -10.584391000 | -1.404110000 |
| 7  | -6.987659000  | -10.517131000 | 1.518939000  |
| 6  | -5.339992000  | -11.673742000 | 2.630312000  |
| 6  | -6.066437000  | -11.318956000 | -3.400794000 |
| 1  | -4.383072000  | -12.409078000 | -2.496162000 |
| 6  | -7.114267000  | -10.550249000 | -2.760126000 |
| 30 | -7.834594000  | -9.349526000  | 0.017135000  |
| 6  | -7.200352000  | -10.424082000 | 2.866545000  |
| 6  | -6.168990000  | -11.156067000 | 3.572888000  |
| 1  | -4.455310000  | -12.279032000 | 2.770208000  |
| 1  | -5.954515000  | -11.456319000 | -4.466722000 |
| 6  | -8.109343000  | -9.826622000  | -3.442259000 |
| 7  | -9.137374000  | -8.736561000  | -1.484090000 |
| 7  | -9.192750000  | -8.684319000  | 1.445147000  |
| 6  | -8.222007000  | -9.678031000  | 3.482426000  |
| 1  | -6.089499000  | -11.244792000 | 4.646871000  |
| 6  | -9.053841000  | -8.986829000  | -2.826906000 |
| 6  | -10.156883000 | -7.859051000  | -1.313732000 |
| 6  | -10.204788000 | -7.814936000  | 1.204801000  |
| 6  | -9.151205000  | -8.874840000  | 2.799234000  |
| 6  | -10.086684000 | -8.246994000  | -3.522775000 |
| 6  | -10.756293000 | -7.530049000  | -2.584304000 |
| 6  | -10.611456000 | -7.364381000  | -0.071007000 |
| 6  | -10.847502000 | -7.435302000  | 2.439978000  |
| 6  | -10.208457000 | -8.110154000  | 3.429118000  |
| 1  | -10.278692000 | -8.291462000  | -4.585175000 |
| 1  | -11.598746000 | -6.865701000  | -2.717210000 |
| 6  | -11.501899000 | -6.259507000  | -0.106382000 |
| 1  | -11.694065000 | -6.767435000  | 2.516991000  |
| 1  | -10.435191000 | -8.110005000  | 4.485573000  |
| 6  | -12.091626000 | -5.193641000  | -0.129061000 |
| 6  | -8.151999000  | -9.948636000  | -4.928420000 |
| 6  | -7.945067000  | -8.833201000  | -5.747483000 |
| 6  | -8.397432000  | -11.187914000 | -5.530520000 |
| 1  | -7.749947000  | -7.868819000  | -5.285934000 |
| 1  | -8.564986000  | -12.056174000 | -4.899369000 |
| 6  | -7.983541000  | -8.952433000  | -7.133512000 |
| 6  | -8.435603000  | -11.308100000 | -6.916398000 |
| 1  | -7.817461000  | -8.077501000  | -7.754657000 |
| 1  | -8.632995000  | -12.275725000 | -7.367383000 |
| 6  | -8.228791000  | -10.190717000 | -7.721792000 |
| 1  | -8.259383000  | -10.284486000 | -8.802847000 |
| 6  | -8.309643000  | -9.729788000  | 4.970750000  |
| 6  | -8.565162000  | -10.940340000 | 5.624751000  |
| 6  | -8.135099000  | -8.574208000  | 5.740287000  |
| 1  | -8.707677000  | -11.839558000 | 5.031943000  |
| 1  | -7.932797000  | -7.631909000  | 5.238114000  |
| 6  | -8.645334000  | -10.993270000 | 7.013077000  |
| 6  | -8.215625000  | -8.626274000  | 7.128631000  |
| 1  | -8.850349000  | -11.939356000 | 7.504528000  |
| 1  | -8.074893000  | -7.720841000  | 7.711136000  |
| 6  | -8.470927000  | -9.836434000  | 7.768887000  |
| 1  | -8.534581000  | -9.877713000  | 8.851774000  |

|   |               |              |              |
|---|---------------|--------------|--------------|
| 6 | -12.558156000 | 2.169156000  | -5.059815000 |
| 6 | -11.660120000 | 1.437691000  | -5.844946000 |
| 6 | -13.536256000 | 2.939549000  | -5.698805000 |
| 1 | -10.896400000 | 0.840111000  | -5.354326000 |
| 1 | -14.240370000 | 3.504225000  | -5.094086000 |
| 6 | -11.737878000 | 1.474100000  | -7.233978000 |
| 6 | -13.614323000 | 2.976859000  | -7.087734000 |
| 1 | -11.031308000 | 0.903054000  | -7.828604000 |
| 1 | -14.382845000 | 3.574924000  | -7.567651000 |
| 6 | -12.715351000 | 2.244335000  | -7.859197000 |
| 1 | -12.776964000 | 2.272807000  | -8.942611000 |
| 6 | -12.707759000 | 2.091640000  | 4.842826000  |
| 6 | -11.832564000 | 1.351007000  | 5.644912000  |
| 6 | -13.708712000 | 2.848680000  | 5.462099000  |
| 1 | -11.050825000 | 0.764027000  | 5.170087000  |
| 1 | -14.395211000 | 3.420489000  | 4.844000000  |
| 6 | -11.954828000 | 1.365309000  | 7.031121000  |
| 6 | -13.831391000 | 2.863837000  | 6.848217000  |
| 1 | -11.265311000 | 0.787537000  | 7.639088000  |
| 1 | -14.617146000 | 3.451784000  | 7.312459000  |
| 6 | -12.954823000 | 2.122258000  | 7.636593000  |
| 1 | -13.051202000 | 2.133501000  | 8.717793000  |
| 6 | -4.356350000  | 12.082675000 | -4.844087000 |
| 6 | -5.269026000  | 12.935037000 | -5.475566000 |
| 6 | -3.469230000  | 11.342929000 | -5.633668000 |
| 1 | -5.955914000  | 13.516129000 | -4.866554000 |
| 1 | -2.762328000  | 10.675583000 | -5.148324000 |
| 6 | -5.293041000  | 13.045847000 | -6.862606000 |
| 6 | -3.492695000  | 11.453656000 | -7.020837000 |
| 1 | -6.003216000  | 13.716273000 | -7.336798000 |
| 1 | -2.799917000  | 10.870270000 | -7.619697000 |
| 6 | -4.404818000  | 12.305492000 | -7.639007000 |
| 1 | -4.422895000  | 12.392664000 | -8.720927000 |
| 6 | -4.512257000  | 12.028799000 | 5.035625000  |
| 6 | -3.663070000  | 11.270506000 | 5.848963000  |
| 6 | -5.434081000  | 12.889006000 | 5.642835000  |
| 1 | -2.950287000  | 10.595936000 | 5.382632000  |
| 1 | -6.091753000  | 13.484350000 | 5.015621000  |
| 6 | -3.732199000  | 11.370775000 | 7.235354000  |
| 6 | -5.503875000  | 12.989335000 | 7.029071000  |
| 1 | -3.069008000  | 10.772415000 | 7.852650000  |
| 1 | -6.220626000  | 13.665823000 | 7.484371000  |
| 6 | -4.652907000  | 12.230659000 | 7.829151000  |
| 1 | -4.706830000  | 12.309464000 | 8.910499000  |
| 6 | 8.061466000   | 9.904304000  | -4.943055000 |
| 6 | 8.309361000   | 11.130553000 | -5.570006000 |
| 6 | 7.839088000   | 8.774752000  | -5.738305000 |
| 1 | 8.488716000   | 12.009326000 | -4.956832000 |
| 1 | 7.641465000   | 7.821284000  | -5.256166000 |
| 6 | 8.335220000   | 11.224665000 | -6.958256000 |
| 6 | 7.864884000   | 8.868397000  | -7.126677000 |
| 1 | 8.534880000   | 12.182275000 | -7.429191000 |
| 1 | 7.687005000   | 7.983257000  | -7.729839000 |
| 6 | 8.113059000   | 10.093763000 | -7.740340000 |
| 1 | 8.134051000   | 10.167061000 | -8.823233000 |
| 6 | 8.301516000   | 9.809539000  | 4.939470000  |
| 6 | 7.235050000   | 9.407578000  | 5.751162000  |
| 6 | 9.473975000   | 10.270912000 | 5.548280000  |
| 1 | 6.324343000   | 9.043957000  | 5.283189000  |

|   |              |               |              |
|---|--------------|---------------|--------------|
| 1 | 10.302589000 | 10.590162000  | 4.922271000  |
| 6 | 7.337765000  | 9.465957000   | 7.137877000  |
| 6 | 9.577078000  | 10.329538000  | 6.934895000  |
| 1 | 6.502643000  | 9.146689000   | 7.753966000  |
| 1 | 10.491436000 | 10.695558000  | 7.391657000  |
| 6 | 8.509219000  | 9.927094000   | 7.733438000  |
| 1 | 8.589495000  | 9.973396000   | 8.815039000  |
| 6 | 12.505202000 | -2.226927000  | -5.071302000 |
| 6 | 13.679573000 | -1.859150000  | -5.737482000 |
| 6 | 11.395922000 | -2.618024000  | -5.829089000 |
| 1 | 14.545543000 | -1.560510000  | -5.153272000 |
| 1 | 10.480279000 | -2.899820000  | -5.316408000 |
| 6 | 13.743296000 | -1.882817000  | -7.127513000 |
| 6 | 11.459287000 | -2.642067000  | -7.219189000 |
| 1 | 14.663785000 | -1.600236000  | -7.629049000 |
| 1 | 10.588715000 | -2.944731000  | -7.793146000 |
| 6 | 12.633300000 | -2.274419000  | -7.872127000 |
| 1 | 12.683287000 | -2.293670000  | -8.956377000 |
| 6 | 12.791558000 | -2.140489000  | 4.807731000  |
| 6 | 14.009742000 | -1.778759000  | 5.393788000  |
| 6 | 11.726163000 | -2.502159000  | 5.639456000  |
| 1 | 14.841987000 | -1.502963000  | 4.752176000  |
| 1 | 10.776423000 | -2.778028000  | 5.189496000  |
| 6 | 14.158828000 | -1.779542000  | 6.777461000  |
| 6 | 11.874794000 | -2.503314000  | 7.023215000  |
| 1 | 15.112261000 | -1.501876000  | 7.216229000  |
| 1 | 11.037103000 | -2.782659000  | 7.655009000  |
| 6 | 13.091768000 | -2.141939000  | 7.595948000  |
| 1 | 13.208376000 | -2.143205000  | 8.675241000  |
| 6 | 4.450157000  | -12.159381000 | -4.819599000 |
| 6 | 4.645848000  | -11.052845000 | -5.653396000 |
| 6 | 4.274458000  | -13.418681000 | -5.404271000 |
| 1 | 4.779002000  | -10.071747000 | -5.205353000 |
| 1 | 4.128273000  | -14.282226000 | -4.761441000 |
| 6 | 4.667294000  | -11.201030000 | -7.037064000 |
| 6 | 4.295240000  | -13.567513000 | -6.787728000 |
| 1 | 4.817379000  | -10.331664000 | -7.669971000 |
| 1 | 4.163376000  | -14.552388000 | -7.225060000 |
| 6 | 4.491866000  | -12.459123000 | -7.607969000 |
| 1 | 4.509127000  | -12.575538000 | -8.687122000 |
| 6 | 4.505671000  | -11.853369000 | 5.079101000  |
| 6 | 4.340884000  | -13.070724000 | 5.749563000  |
| 6 | 4.703765000  | -10.692192000 | 5.834384000  |
| 1 | 4.193099000  | -13.976545000 | 5.168220000  |
| 1 | 4.828431000  | -9.743195000  | 5.319561000  |
| 6 | 4.374212000  | -13.124956000 | 7.139757000  |
| 6 | 4.737735000  | -10.745603000 | 7.224553000  |
| 1 | 4.250556000  | -14.078331000 | 7.644162000  |
| 1 | 4.889077000  | -9.834611000  | 7.795615000  |
| 6 | 4.572712000  | -11.962682000 | 7.881150000  |
| 1 | 4.599485000  | -12.005340000 | 8.965521000  |
| 6 | 0.889884000  | 1.068651000   | -0.009304000 |
| 6 | -0.499638000 | 1.307367000   | -0.006464000 |
| 6 | 1.379154000  | -0.253669000  | -0.011657000 |
| 6 | -1.401228000 | 0.223232000   | -0.009081000 |
| 6 | 0.477690000  | -1.338057000  | -0.006994000 |
| 6 | -0.912459000 | -1.099598000  | -0.007633000 |
| 6 | -1.016899000 | 2.714061000   | 0.003074000  |
| 6 | -1.822540000 | 3.192318000   | -1.035403000 |

|   |              |              |              |
|---|--------------|--------------|--------------|
| 6 | -0.707635000 | 3.582650000  | 1.054922000  |
| 1 | -2.074248000 | 2.533850000  | -1.862217000 |
| 1 | -0.083916000 | 3.230466000  | 1.871907000  |
| 6 | -2.305167000 | 4.495779000  | -1.022292000 |
| 6 | -1.187704000 | 4.886863000  | 1.068797000  |
| 1 | -2.909253000 | 4.851347000  | -1.852156000 |
| 1 | -0.954719000 | 5.533951000  | 1.909644000  |
| 6 | -1.995479000 | 5.364842000  | 0.030348000  |
| 6 | 1.847021000  | 2.222014000  | -0.008671000 |
| 6 | 1.854697000  | 3.148865000  | -1.056051000 |
| 6 | 2.754627000  | 2.400939000  | 1.040302000  |
| 1 | 1.157767000  | 3.027903000  | -1.880805000 |
| 1 | 2.764932000  | 1.692277000  | 1.863879000  |
| 6 | 2.740623000  | 4.219862000  | -1.055454000 |
| 6 | 3.639960000  | 3.472385000  | 1.043516000  |
| 1 | 2.744683000  | 4.910352000  | -1.893990000 |
| 1 | 4.315757000  | 3.604391000  | 1.883630000  |
| 6 | 3.648029000  | 4.400117000  | -0.004797000 |
| 6 | 2.857112000  | -0.503930000 | -0.021872000 |
| 6 | 3.654896000  | -0.035614000 | -1.071253000 |
| 6 | 3.475525000  | -1.210540000 | 1.014743000  |
| 1 | 3.194401000  | 0.514978000  | -1.886893000 |
| 1 | 2.874234000  | -1.583087000 | 1.839507000  |
| 6 | 5.025731000  | -0.264948000 | -1.084122000 |
| 6 | 4.846039000  | -1.442527000 | 1.002608000  |
| 1 | 5.619442000  | 0.087572000  | -1.922740000 |
| 1 | 5.306373000  | -1.972770000 | 1.831440000  |
| 6 | 5.644277000  | -0.973054000 | -0.047131000 |
| 6 | 0.996184000  | -2.744448000 | 0.002796000  |
| 6 | 1.801278000  | -3.222924000 | -1.036081000 |
| 6 | 0.687385000  | -3.613814000 | 1.054152000  |
| 1 | 2.067003000  | -2.559533000 | -1.854480000 |
| 1 | 0.049630000  | -3.267495000 | 1.862714000  |
| 6 | 2.279126000  | -4.528200000 | -1.026194000 |
| 6 | 1.170799000  | -4.916768000 | 1.069511000  |
| 1 | 2.921509000  | -4.867227000 | -1.833824000 |
| 1 | 0.896698000  | -5.578184000 | 1.886325000  |
| 6 | 1.973983000  | -5.396894000 | 0.028305000  |
| 6 | -1.870585000 | -2.252367000 | -0.006378000 |
| 6 | -2.789242000 | -2.421380000 | 1.034712000  |
| 6 | -1.869387000 | -3.188826000 | -1.045347000 |
| 1 | -2.818368000 | -1.696482000 | 1.843505000  |
| 1 | -1.152809000 | -3.085906000 | -1.855527000 |
| 6 | -3.674235000 | -3.493106000 | 1.039577000  |
| 6 | -2.758959000 | -4.256871000 | -1.045866000 |
| 1 | -4.392944000 | -3.587898000 | 1.848413000  |
| 1 | -2.720739000 | -4.982845000 | -1.852894000 |
| 6 | -3.675608000 | -4.428486000 | -0.001881000 |
| 6 | -2.878453000 | 0.478144000  | -0.016297000 |
| 6 | -3.679785000 | 0.018156000  | -1.066412000 |
| 6 | -3.492327000 | 1.184489000  | 1.023308000  |
| 1 | -3.225868000 | -0.547196000 | -1.875613000 |
| 1 | -2.886142000 | 1.565526000  | 1.840533000  |
| 6 | -5.048326000 | 0.260617000  | -1.079941000 |
| 6 | -4.862105000 | 1.420619000  | 1.015494000  |
| 1 | -5.651070000 | -0.127534000 | -1.895954000 |
| 1 | -5.309553000 | 1.991712000  | 1.823921000  |
| 6 | -5.663446000 | 0.964756000  | -0.038057000 |
| 6 | 7.108509000  | -1.219657000 | -0.060579000 |

|   |              |              |              |
|---|--------------|--------------|--------------|
| 6 | 7.650052000  | -2.425443000 | 0.398354000  |
| 6 | 9.025198000  | -2.614526000 | 0.369852000  |
| 7 | 9.874699000  | -1.684737000 | -0.083710000 |
| 6 | 9.369009000  | -0.527814000 | -0.528248000 |
| 6 | 8.007139000  | -0.256896000 | -0.533280000 |
| 1 | 7.006770000  | -3.224576000 | 0.751257000  |
| 1 | 9.475621000  | -3.541810000 | 0.716028000  |
| 1 | 10.090702000 | 0.201848000  | -0.887916000 |
| 1 | 7.654849000  | 0.708556000  | -0.880883000 |
| 6 | 4.593964000  | 5.544626000  | -0.001403000 |
| 6 | 5.890948000  | 5.418597000  | 0.508428000  |
| 6 | 6.743285000  | 6.514415000  | 0.496314000  |
| 7 | 6.381796000  | 7.707359000  | 0.008365000  |
| 6 | 5.144552000  | 7.840662000  | -0.485006000 |
| 6 | 4.228519000  | 6.797467000  | -0.506561000 |
| 1 | 6.247864000  | 4.468431000  | 0.891481000  |
| 1 | 7.756588000  | 6.445373000  | 0.885132000  |
| 1 | 4.888311000  | 8.824857000  | -0.870405000 |
| 1 | 3.229812000  | 6.971341000  | -0.892935000 |
| 6 | -2.510008000 | 6.757397000  | 0.045769000  |
| 6 | -1.731483000 | 7.817433000  | 0.523588000  |
| 6 | -2.250699000 | 9.104872000  | 0.521803000  |
| 7 | -3.480846000 | 9.388430000  | 0.076538000  |
| 6 | -4.235101000 | 8.383381000  | -0.384594000 |
| 6 | -3.793598000 | 7.067286000  | -0.416535000 |
| 1 | -0.717916000 | 7.649128000  | 0.872066000  |
| 1 | -1.669306000 | 9.949576000  | 0.883852000  |
| 1 | -5.228342000 | 8.653704000  | -0.735215000 |
| 1 | -4.458219000 | 6.288472000  | -0.775156000 |
| 6 | -7.126415000 | 1.219280000  | -0.050453000 |
| 6 | -7.877591000 | 1.221798000  | 1.130497000  |
| 6 | -9.243970000 | 1.460075000  | 1.073107000  |
| 7 | -9.888129000 | 1.689092000  | -0.076097000 |
| 6 | -9.183527000 | 1.691766000  | -1.212653000 |
| 6 | -7.814422000 | 1.465250000  | -1.244392000 |
| 1 | -7.409436000 | 1.013739000  | 2.086576000  |
| 1 | -9.860474000 | 1.462241000  | 1.969661000  |
| 1 | -9.749682000 | 1.890124000  | -2.120483000 |
| 1 | -7.286627000 | 1.504519000  | -2.191231000 |
| 6 | -4.625446000 | -5.569974000 | 0.001295000  |
| 6 | -5.003170000 | -6.201937000 | 1.191744000  |
| 6 | -5.900265000 | -7.260410000 | 1.151358000  |
| 7 | -6.427602000 | -7.714884000 | 0.009610000  |
| 6 | -6.072119000 | -7.124625000 | -1.136378000 |
| 6 | -5.184028000 | -6.058909000 | -1.185242000 |
| 1 | -4.584504000 | -5.890422000 | 2.142637000  |
| 1 | -6.212644000 | -7.777354000 | 2.056425000  |
| 1 | -6.530916000 | -7.526202000 | -2.037529000 |
| 1 | -4.951849000 | -5.598080000 | -2.139312000 |
| 6 | 2.491270000  | -6.788677000 | 0.044158000  |
| 6 | 2.857890000  | -7.416483000 | 1.240293000  |
| 6 | 3.341703000  | -8.717095000 | 1.211477000  |
| 7 | 3.479469000  | -9.409453000 | 0.075861000  |
| 6 | 3.130752000  | -8.824291000 | -1.074689000 |
| 6 | 2.635701000  | -7.528760000 | -1.135112000 |
| 1 | 2.792050000  | -6.889932000 | 2.186340000  |
| 1 | 3.641752000  | -9.234302000 | 2.120641000  |
| 1 | 3.252088000  | -9.430694000 | -1.969955000 |
| 1 | 2.342475000  | -7.110930000 | -2.092183000 |

**c-P6-T6<sup>+</sup>** optimized with **B3LYP** - E=-23385.818909au

|    |              |              |              |
|----|--------------|--------------|--------------|
| 6  | 12.312424000 | 3.702809000  | 1.347411000  |
| 6  | 12.804186000 | 3.167578000  | 2.593015000  |
| 6  | 12.469199000 | 4.070253000  | 3.556907000  |
| 6  | 11.735649000 | 5.132670000  | 2.902513000  |
| 7  | 11.675560000 | 4.880256000  | 1.540411000  |
| 1  | 13.370630000 | 2.253119000  | 2.700236000  |
| 1  | 12.712123000 | 4.034659000  | 4.608382000  |
| 6  | 11.170084000 | 6.239746000  | 3.548874000  |
| 6  | 10.455189000 | 7.277717000  | 2.896140000  |
| 6  | 9.757250000  | 8.346302000  | 3.573004000  |
| 7  | 10.277244000 | 7.388109000  | 1.539497000  |
| 6  | 9.152487000  | 9.096432000  | 2.606246000  |
| 1  | 9.730812000  | 8.499455000  | 4.641502000  |
| 6  | 9.494761000  | 8.490153000  | 1.346635000  |
| 1  | 8.550779000  | 9.985814000  | 2.729751000  |
| 6  | 9.085046000  | 8.981038000  | 0.078484000  |
| 6  | 9.526415000  | 8.510921000  | -1.186533000 |
| 6  | 9.210416000  | 9.136310000  | -2.444213000 |
| 7  | 10.312436000 | 7.411251000  | -1.379082000 |
| 6  | 9.832438000  | 8.398774000  | -3.408899000 |
| 1  | 8.611285000  | 10.027473000 | -2.567032000 |
| 6  | 10.513986000 | 7.318456000  | -2.733195000 |
| 1  | 9.826010000  | 8.565934000  | -4.475572000 |
| 6  | 11.232179000 | 6.284761000  | -3.388478000 |
| 6  | 11.777246000 | 5.163317000  | -2.748459000 |
| 6  | 12.521525000 | 4.108782000  | -3.402741000 |
| 7  | 11.690450000 | 4.892175000  | -1.391032000 |
| 6  | 12.840407000 | 3.194374000  | -2.444073000 |
| 1  | 12.783769000 | 4.086654000  | -4.449940000 |
| 6  | 12.327404000 | 3.713954000  | -1.200825000 |
| 1  | 13.410296000 | 2.282242000  | -2.552665000 |
| 6  | 12.516392000 | 3.084706000  | 0.071829000  |
| 30 | 10.649495000 | 5.951765000  | 0.073458000  |
| 6  | 12.888843000 | 1.752452000  | 0.066625000  |
| 6  | 13.047479000 | 0.525586000  | 0.055131000  |
| 6  | 8.108488000  | 9.992814000  | 0.074549000  |
| 6  | 7.135929000  | 10.738736000 | 0.067464000  |
| 6  | 0.157714000  | 12.928735000 | -3.462082000 |
| 6  | -1.095535000 | 12.837887000 | -2.841095000 |
| 6  | 1.402194000  | 12.803208000 | -2.793170000 |
| 6  | -2.369159000 | 12.982476000 | -3.511716000 |
| 7  | -1.309598000 | 12.605168000 | -1.490990000 |
| 6  | 2.684946000  | 12.745255000 | -3.457147000 |
| 7  | 1.567671000  | 12.657555000 | -1.439264000 |
| 6  | -3.338112000 | 12.797274000 | -2.570843000 |
| 1  | -2.500986000 | 13.219196000 | -4.556919000 |
| 6  | -2.653134000 | 12.585808000 | -1.320802000 |
| 30 | 0.111701000  | 12.200380000 | -0.014692000 |
| 6  | 3.622249000  | 12.547288000 | -2.486239000 |
| 1  | 2.844044000  | 12.834749000 | -4.521276000 |
| 6  | 2.909177000  | 12.504474000 | -1.236108000 |
| 1  | -4.410714000 | 12.851357000 | -2.694611000 |
| 6  | -3.309838000 | 12.424650000 | -0.058406000 |
| 7  | 1.528809000  | 12.589789000 | 1.466597000  |
| 7  | -1.348664000 | 12.579415000 | 1.429450000  |



|    |               |              |              |
|----|---------------|--------------|--------------|
| 1  | 4.693714000   | 12.460015000 | -2.598857000 |
| 6  | 3.521798000   | 12.338254000 | 0.033370000  |
| 6  | -2.684905000  | 12.545831000 | 1.224322000  |
| 6  | -4.651671000  | 12.087203000 | -0.079204000 |
| 6  | 2.877712000   | 12.458310000 | 1.293968000  |
| 6  | 1.324994000   | 12.694811000 | 2.819741000  |
| 6  | -1.172628000  | 12.750478000 | 2.793787000  |
| 6  | 4.875064000   | 11.956277000 | 0.045448000  |
| 6  | -3.406069000  | 12.700188000 | 2.463923000  |
| 6  | -5.796073000  | 11.618241000 | -0.089657000 |
| 6  | 3.554963000   | 12.463197000 | 2.563507000  |
| 6  | 2.588622000   | 12.621347000 | 3.515144000  |
| 6  | 0.061061000   | 12.805393000 | 3.454750000  |
| 6  | -2.465465000  | 12.856727000 | 3.436611000  |
| 6  | 5.985344000   | 11.436970000 | 0.057199000  |
| 1  | -4.482082000  | 12.736879000 | 2.560973000  |
| 1  | 4.623827000   | 12.382635000 | 2.702979000  |
| 1  | 2.718877000   | 12.679639000 | 4.585398000  |
| 1  | -2.626785000  | 13.045671000 | 4.487369000  |
| 6  | -12.877670000 | 0.786162000  | -0.000451000 |
| 6  | -12.893572000 | -0.542901000 | 0.019807000  |
| 6  | -12.746318000 | 2.014972000  | -0.022423000 |
| 6  | -12.760296000 | -1.771811000 | 0.034645000  |
| 6  | -12.376972000 | 3.348413000  | -0.044353000 |
| 6  | -12.431417000 | -3.116963000 | 0.048105000  |
| 6  | -12.136651000 | 3.946741000  | -1.321477000 |
| 6  | -12.235144000 | 4.007311000  | 1.221141000  |
| 6  | -12.244119000 | -3.756714000 | -1.218384000 |
| 6  | -12.246214000 | -3.731315000 | 1.327776000  |
| 6  | -12.471684000 | 3.341019000  | -2.579616000 |
| 7  | -11.586680000 | 5.178207000  | -1.503636000 |
| 6  | -12.797846000 | 3.523365000  | 2.452287000  |
| 7  | -11.569792000 | 5.172249000  | 1.410277000  |
| 7  | -11.697038000 | -4.983264000 | -1.388090000 |
| 6  | -12.619707000 | -3.175676000 | -2.484004000 |
| 7  | -11.683303000 | -4.949192000 | 1.520183000  |
| 6  | -12.627962000 | -3.133618000 | 2.582619000  |
| 6  | -12.133189000 | 4.248204000  | -3.544247000 |
| 1  | -12.928012000 | 2.369408000  | -2.706467000 |
| 6  | -11.581935000 | 5.394664000  | -2.865565000 |
| 30 | -10.487176000 | 6.206943000  | -0.053072000 |
| 6  | -12.471125000 | 4.441397000  | 3.408227000  |
| 1  | -13.399596000 | 2.631658000  | 2.558260000  |
| 6  | -11.674144000 | 5.455522000  | 2.758700000  |
| 6  | -11.708565000 | -5.223631000 | -2.751598000 |
| 30 | -10.613743000 | -6.014053000 | 0.074551000  |
| 6  | -12.295364000 | -4.092283000 | -3.437851000 |
| 1  | -13.086295000 | -2.209546000 | -2.615550000 |
| 6  | -11.703001000 | -5.171339000 | 2.886954000  |
| 6  | -12.297628000 | -4.033095000 | 3.552448000  |
| 1  | -13.103687000 | -2.169810000 | 2.697932000  |
| 1  | -12.246327000 | 4.146847000  | -4.613193000 |
| 6  | -11.084071000 | 6.550346000  | -3.510574000 |
| 7  | -10.119296000 | 7.657988000  | -1.516275000 |
| 7  | -10.134126000 | 7.670306000  | 1.397602000  |
| 1  | -12.759892000 | 4.441380000  | 4.448456000  |
| 6  | -11.082004000 | 6.557604000  | 3.404406000  |
| 6  | -11.179720000 | -6.356715000 | -3.385597000 |
| 7  | -10.239237000 | -7.466001000 | -1.376067000 |

|    |               |               |              |
|----|---------------|---------------|--------------|
| 7  | -10.263638000 | -7.453333000  | 1.544278000  |
| 1  | -12.430829000 | -4.011693000  | -4.506078000 |
| 6  | -11.184686000 | -6.300959000  | 3.537341000  |
| 1  | -12.439447000 | -3.937271000  | 4.618620000  |
| 6  | -10.417337000 | 7.608871000   | -2.864837000 |
| 6  | -9.435808000  | 8.812404000   | -1.327157000 |
| 6  | -10.321387000 | 7.559967000   | 2.759579000  |
| 6  | -9.334717000  | 8.756405000   | 1.215674000  |
| 6  | -10.493793000 | -7.406582000  | -2.725555000 |
| 6  | -9.557273000  | -8.630781000  | -1.169793000 |
| 6  | -9.567831000  | -8.612038000  | 1.360961000  |
| 6  | -10.509460000 | -7.366440000  | 2.893009000  |
| 6  | -9.929458000  | 8.802929000   | -3.514221000 |
| 6  | -9.293144000  | 9.540796000   | -2.558152000 |
| 6  | -8.933231000  | 9.261506000   | -0.061647000 |
| 6  | -9.596789000  | 8.605430000   | 3.438307000  |
| 6  | -8.974263000  | 9.347264000   | 2.473846000  |
| 6  | -9.966881000  | -8.582844000  | -3.376605000 |
| 6  | -9.359166000  | -9.331701000  | -2.410339000 |
| 6  | -9.148487000  | -9.116448000  | 0.101715000  |
| 6  | -9.362498000  | -9.289192000  | 2.614858000  |
| 6  | -9.973896000  | -8.527721000  | 3.566950000  |
| 1  | -10.072151000 | 9.054037000   | -4.554435000 |
| 1  | -8.815280000  | 10.504628000  | -2.664004000 |
| 6  | -7.956926000  | 10.241640000  | -0.081105000 |
| 1  | -9.565394000  | 8.754404000   | 4.507202000  |
| 1  | -8.354699000  | 10.223789000  | 2.600879000  |
| 1  | -10.068802000 | -8.816754000  | -4.425652000 |
| 1  | -8.869949000  | -10.289838000 | -2.515682000 |
| 6  | -8.211161000  | -10.162935000 | 0.109815000  |
| 1  | -8.862762000  | -10.239843000 | 2.737409000  |
| 1  | -10.069655000 | -8.740095000  | 4.621094000  |
| 6  | -6.949459000  | 10.958151000  | -0.089808000 |
| 6  | -7.242218000  | -10.915018000 | 0.103745000  |
| 6  | -6.084429000  | -11.599491000 | 0.090140000  |
| 6  | -4.957630000  | -12.083708000 | 0.071265000  |
| 6  | -3.588657000  | -12.398392000 | 0.041812000  |
| 6  | -2.931311000  | -12.532765000 | 1.293669000  |
| 6  | -2.983302000  | -12.509703000 | -1.238924000 |
| 6  | -3.609684000  | -12.697450000 | 2.552755000  |
| 7  | -1.578954000  | -12.577456000 | 1.464074000  |
| 7  | -1.639045000  | -12.548695000 | -1.465824000 |
| 6  | -3.712351000  | -12.659207000 | -2.470872000 |
| 6  | -2.637399000  | -12.870611000 | 3.494020000  |
| 1  | -4.682020000  | -12.725515000 | 2.686134000  |
| 6  | -1.369206000  | -12.766183000 | 2.809031000  |
| 30 | -0.175367000  | -12.193791000 | -0.026710000 |
| 6  | -1.484289000  | -12.723298000 | -2.820682000 |
| 6  | -2.779330000  | -12.819628000 | -3.453781000 |
| 1  | -4.789196000  | -12.688644000 | -2.560317000 |
| 1  | -2.766260000  | -13.070020000 | 4.547209000  |
| 6  | -0.101448000  | -12.842875000 | 3.437073000  |
| 7  | 1.291135000   | -12.605565000 | 1.400550000  |
| 7  | 1.231356000   | -12.594874000 | -1.517710000 |
| 6  | -0.242612000  | -12.798472000 | -3.499593000 |
| 1  | -2.951423000  | -13.007275000 | -4.502970000 |
| 6  | 1.128400000   | -12.738072000 | 2.769305000  |
| 6  | 2.622656000   | -12.478911000 | 1.188588000  |
| 6  | 2.570083000   | -12.467874000 | -1.359140000 |

|    |              |               |              |
|----|--------------|---------------|--------------|
| 6  | 1.013122000  | -12.708137000 | -2.880083000 |
| 6  | 2.421976000  | -12.689220000 | 3.416116000  |
| 6  | 3.350317000  | -12.519900000 | 2.432927000  |
| 6  | 3.230920000  | -12.326475000 | -0.097914000 |
| 6  | 3.246799000  | -12.493088000 | -2.632600000 |
| 6  | 2.279340000  | -12.651201000 | -3.578859000 |
| 1  | 2.591777000  | -12.768732000 | 4.479576000  |
| 1  | 4.424280000  | -12.449064000 | 2.532652000  |
| 6  | 4.564458000  | -11.951239000 | -0.121731000 |
| 1  | 4.315786000  | -12.419225000 | -2.774933000 |
| 1  | 2.405424000  | -12.716574000 | -4.649333000 |
| 6  | 5.701521000  | -11.467528000 | -0.132397000 |
| 6  | 6.857331000  | -10.809989000 | -0.135076000 |
| 6  | 7.871972000  | -10.105196000 | -0.130064000 |
| 6  | 8.877992000  | -9.153787000  | -0.113603000 |
| 6  | 9.340475000  | -8.716648000  | 1.169392000  |
| 6  | 9.337540000  | -8.666587000  | -1.379124000 |
| 6  | 9.005859000  | -9.357017000  | 2.411973000  |
| 7  | 10.149976000 | -7.646118000  | 1.374706000  |
| 7  | 10.149957000 | -7.590583000  | -1.542080000 |
| 6  | 9.003947000  | -9.257582000  | -2.645601000 |
| 6  | 9.643482000  | -8.651210000  | 3.391500000  |
| 1  | 8.384723000  | -10.235155000 | 2.517773000  |
| 6  | 10.354054000 | -7.578578000  | 2.737598000  |
| 30 | 10.530149000 | -6.168733000  | -0.056668000 |
| 6  | 10.361871000 | -7.474638000  | -2.900633000 |
| 6  | 9.648031000  | -8.517936000  | -3.596337000 |
| 1  | 8.380458000  | -10.129205000 | -2.786297000 |
| 1  | 9.627291000  | -8.836056000  | 4.455126000  |
| 6  | 11.092414000 | -6.577024000  | 3.404447000  |
| 7  | 11.591997000 | -5.159481000  | 1.432517000  |
| 7  | 11.614919000 | -5.117265000  | -1.499493000 |
| 6  | 11.116998000 | -6.457178000  | -3.524938000 |
| 1  | 9.635632000  | -8.663559000  | -4.666107000 |
| 6  | 11.668675000 | -5.450366000  | 2.781781000  |
| 6  | 12.263904000 | -3.993473000  | 1.262463000  |
| 6  | 12.284035000 | -3.957465000  | -1.285440000 |
| 6  | 11.700617000 | -5.361518000  | -2.857247000 |
| 6  | 12.439006000 | -4.432713000  | 3.454714000  |
| 6  | 12.787327000 | -3.510008000  | 2.509829000  |
| 6  | 12.476138000 | -3.351606000  | -0.001000000 |
| 6  | 12.821199000 | -3.434232000  | -2.511310000 |
| 6  | 12.480549000 | -4.324354000  | -3.489049000 |
| 1  | 12.702345000 | -4.435042000  | 4.501676000  |
| 1  | 13.383646000 | -2.617165000  | 2.634984000  |
| 6  | 12.884344000 | -2.030644000  | 0.020964000  |
| 1  | 13.418998000 | -2.538169000  | -2.601260000 |
| 1  | 12.752844000 | -4.292258000  | -4.533216000 |
| 6  | 13.028798000 | -0.802484000  | 0.038980000  |
| 6  | 11.267669000 | -6.721737000  | 4.876711000  |
| 6  | 10.767356000 | -5.752115000  | 5.761194000  |
| 6  | 11.942141000 | -7.837669000  | 5.400063000  |
| 1  | 10.238633000 | -4.890633000  | 5.362930000  |
| 1  | 12.340514000 | -8.585738000  | 4.721157000  |
| 6  | 10.934655000 | -5.897635000  | 7.137474000  |
| 6  | 12.119981000 | -7.973390000  | 6.776072000  |
| 1  | 10.534896000 | -5.145800000  | 7.811930000  |
| 1  | 12.657191000 | -8.832539000  | 7.166626000  |
| 6  | 11.614479000 | -7.006133000  | 7.647836000  |

|   |               |              |              |
|---|---------------|--------------|--------------|
| 1 | 11.751493000  | -7.114946000 | 8.719632000  |
| 6 | 11.300043000  | -6.549972000 | -5.000526000 |
| 6 | 11.966150000  | -7.653158000 | -5.560349000 |
| 6 | 10.814574000  | -5.543750000 | -5.851791000 |
| 1 | 12.352922000  | -8.429513000 | -4.906960000 |
| 1 | 10.292465000  | -4.691887000 | -5.425179000 |
| 6 | 12.150754000  | -7.740620000 | -6.939374000 |
| 6 | 10.988544000  | -5.641014000 | -7.231535000 |
| 1 | 12.681580000  | -8.590482000 | -7.357971000 |
| 1 | 10.600442000  | -4.861077000 | -7.880410000 |
| 6 | 11.660141000  | -6.737169000 | -7.778125000 |
| 1 | 11.802354000  | -6.808406000 | -8.852400000 |
| 6 | 11.313551000  | 6.335920000  | 5.030318000  |
| 6 | 10.756489000  | 5.360431000  | 5.872449000  |
| 6 | 12.012669000  | 7.410538000  | 5.603981000  |
| 1 | 10.209005000  | 4.530398000  | 5.434331000  |
| 1 | 12.453186000  | 8.164538000  | 4.958255000  |
| 6 | 10.895042000  | 5.457578000  | 7.256720000  |
| 6 | 12.158282000  | 7.500453000  | 6.987697000  |
| 1 | 10.453818000  | 4.699552000  | 7.897748000  |
| 1 | 12.713476000  | 8.329061000  | 7.417338000  |
| 6 | 11.598334000  | 6.525987000  | 7.817306000  |
| 1 | 11.711299000  | 6.598590000  | 8.895006000  |
| 6 | 11.405270000  | 6.401815000  | -4.865062000 |
| 6 | 10.861032000  | 5.441420000  | -5.732584000 |
| 6 | 12.120852000  | 7.481223000  | -5.408777000 |
| 1 | 10.300368000  | 4.608048000  | -5.318090000 |
| 1 | 12.551645000  | 8.223585000  | -4.743323000 |
| 6 | 11.027949000  | 5.558011000  | -7.112166000 |
| 6 | 12.294924000  | 7.590511000  | -6.787769000 |
| 1 | 10.595931000  | 4.811804000  | -7.773006000 |
| 1 | 12.862442000  | 8.422601000  | -7.193924000 |
| 6 | 11.747425000  | 6.630981000  | -7.642713000 |
| 1 | 11.882366000  | 6.718792000  | -8.716742000 |
| 6 | 0.055398000   | 12.981416000 | 4.936118000  |
| 6 | 0.626581000   | 14.127598000 | 5.512672000  |
| 6 | -0.517153000  | 12.011483000 | 5.774110000  |
| 1 | 1.064598000   | 14.885413000 | 4.869653000  |
| 1 | -0.952862000  | 11.119230000 | 5.333183000  |
| 6 | 0.615548000   | 14.302698000 | 6.895895000  |
| 6 | -0.518209000  | 12.184324000 | 7.158010000  |
| 1 | 1.048113000   | 15.200316000 | 7.327901000  |
| 1 | -0.958436000  | 11.423397000 | 7.796302000  |
| 6 | 0.045242000   | 13.331101000 | 7.721781000  |
| 1 | 0.039123000   | 13.468263000 | 8.799121000  |
| 6 | 0.193843000   | 13.165240000 | -4.933903000 |
| 6 | -0.360927000  | 12.234609000 | -5.826962000 |
| 6 | 0.786721000   | 14.330667000 | -5.446966000 |
| 1 | -0.811878000  | 11.326862000 | -5.435898000 |
| 1 | 1.211014000   | 15.058454000 | -4.761501000 |
| 6 | -0.323125000  | 12.464413000 | -7.201896000 |
| 6 | 0.813978000   | 14.563058000 | -6.821388000 |
| 1 | -0.748931000  | 11.732985000 | -7.882966000 |
| 1 | 1.262785000   | 15.475026000 | -7.203902000 |
| 6 | 0.261308000   | 13.630088000 | -7.702040000 |
| 1 | 0.285425000   | 13.811639000 | -8.772527000 |
| 6 | -11.263474000 | 6.680035000  | 4.877557000  |
| 6 | -11.911520000 | 7.803806000  | 5.417935000  |
| 6 | -10.796035000 | 5.679925000  | 5.746312000  |

|   |               |               |              |
|---|---------------|---------------|--------------|
| 1 | -12.284999000 | 8.575271000   | 4.751155000  |
| 1 | -10.286501000 | 4.813443000   | 5.334627000  |
| 6 | -12.096706000 | 7.917316000   | 6.794878000  |
| 6 | -10.969765000 | 5.803775000   | 7.123914000  |
| 1 | -12.614223000 | 8.782556000   | 7.198382000  |
| 1 | -10.595138000 | 5.028713000   | 7.786386000  |
| 6 | -11.623831000 | 6.919941000   | 7.650993000  |
| 1 | -11.766246000 | 7.011518000   | 8.723717000  |
| 6 | -11.278984000 | 6.647301000   | -4.983846000 |
| 6 | -10.177664000 | 6.733386000   | -5.851682000 |
| 6 | -12.575752000 | 6.656701000   | -5.525291000 |
| 1 | -9.172990000  | 6.717312000   | -5.439060000 |
| 1 | -13.431606000 | 6.601404000   | -4.859185000 |
| 6 | -10.369897000 | 6.822826000   | -7.229472000 |
| 6 | -12.764626000 | 6.761379000   | -6.902415000 |
| 1 | -9.510346000  | 6.878585000   | -7.891277000 |
| 1 | -13.772189000 | 6.784860000   | -7.306817000 |
| 6 | -11.663015000 | 6.841381000   | -7.757626000 |
| 1 | -11.812001000 | 6.919626000   | -8.830510000 |
| 6 | -11.357015000 | -6.384543000  | 5.017069000  |
| 6 | -12.643426000 | -6.467179000  | 5.573893000  |
| 6 | -10.243731000 | -6.383303000  | 5.872397000  |
| 1 | -13.507978000 | -6.479079000  | 4.916650000  |
| 1 | -9.246324000  | -6.314847000  | 5.447021000  |
| 6 | -12.810965000 | -6.553016000  | 6.955789000  |
| 6 | -10.414358000 | -6.459499000  | 7.254202000  |
| 1 | -13.810880000 | -6.629566000  | 7.372651000  |
| 1 | -9.545454000  | -6.450265000  | 7.906219000  |
| 6 | -11.697729000 | -6.547269000  | 7.798920000  |
| 1 | -11.829608000 | -6.613472000  | 8.874901000  |
| 6 | -11.352094000 | -6.465691000  | -4.863356000 |
| 6 | -12.638664000 | -6.557689000  | -5.418531000 |
| 6 | -10.239248000 | -6.479945000  | -5.719228000 |
| 1 | -13.502976000 | -6.557646000  | -4.760911000 |
| 1 | -9.241702000  | -6.403365000  | -5.295555000 |
| 6 | -12.806656000 | -6.667755000  | -6.798608000 |
| 6 | -10.410135000 | -6.580208000  | -7.099394000 |
| 1 | -13.806722000 | -6.751196000  | -7.213768000 |
| 1 | -9.541506000  | -6.582101000  | -7.751851000 |
| 6 | -11.693708000 | -6.677177000  | -7.642099000 |
| 1 | -11.825951000 | -6.762002000  | -8.716724000 |
| 6 | -0.070083000  | -13.043042000 | 4.915040000  |
| 6 | -0.612348000  | -12.082994000 | 5.784224000  |
| 6 | 0.506275000   | -14.203016000 | 5.457459000  |
| 1 | -1.056442000  | -11.181524000 | 5.370869000  |
| 1 | 0.918157000   | -14.954206000 | 4.789958000  |
| 6 | -0.576194000  | -12.277631000 | 7.164421000  |
| 6 | 0.532993000   | -14.399950000 | 6.837833000  |
| 1 | -0.993126000  | -11.524116000 | 7.826675000  |
| 1 | 0.970021000   | -15.307758000 | 7.243218000  |
| 6 | -0.005948000  | -13.437554000 | 7.694333000  |
| 1 | 0.015892000   | -13.591988000 | 8.769112000  |
| 6 | -0.271658000  | -12.981066000 | -4.979816000 |
| 6 | 0.279042000   | -14.135895000 | -5.558703000 |
| 6 | -0.846035000  | -12.009858000 | -5.815301000 |
| 1 | 0.715655000   | -14.895695000 | -4.917198000 |
| 1 | -1.270246000  | -11.112057000 | -5.373949000 |
| 6 | 0.249367000   | -14.316709000 | -6.941210000 |
| 6 | -0.866338000  | -12.188277000 | -7.197984000 |

|   |              |               |              |
|---|--------------|---------------|--------------|
| 1 | 0.667294000  | -15.220625000 | -7.374466000 |
| 1 | -1.307391000 | -11.425996000 | -7.834079000 |
| 6 | -0.321150000 | -13.343176000 | -7.764001000 |
| 1 | -0.343052000 | -13.484983000 | -8.840514000 |
| 6 | -1.196509000 | 0.711036000   | -0.003537000 |
| 6 | 0.035428000  | 1.404613000   | -0.002102000 |
| 6 | -1.212321000 | -0.702703000  | -0.002670000 |
| 6 | 1.252884000  | 0.684676000   | -0.000885000 |
| 6 | 0.004574000  | -1.423659000  | -0.004583000 |
| 6 | 1.237670000  | -0.729990000  | -0.004086000 |
| 6 | 0.049102000  | 2.904533000   | -0.003866000 |
| 6 | 0.585784000  | 3.624917000   | 1.073302000  |
| 6 | -0.473564000 | 3.629029000   | -1.085322000 |
| 1 | 0.996941000  | 3.087033000   | 1.922183000  |
| 1 | -0.894481000 | 3.094383000   | -1.931431000 |
| 6 | 0.600046000  | 5.017344000   | 1.070286000  |
| 6 | -0.458556000 | 5.021308000   | -1.091877000 |
| 1 | 0.996323000  | 5.544289000   | 1.933431000  |
| 1 | -0.842532000 | 5.550350000   | -1.959269000 |
| 6 | 0.078876000  | 5.745222000   | -0.013476000 |
| 6 | -2.487547000 | 1.475505000   | -0.008490000 |
| 6 | -2.843928000 | 2.302223000   | 1.067243000  |
| 6 | -3.375019000 | 1.386138000   | -1.091147000 |
| 1 | -2.174209000 | 2.389103000   | 1.917398000  |
| 1 | -3.122574000 | 0.753063000   | -1.936333000 |
| 6 | -4.042168000 | 3.011685000   | 1.062551000  |
| 6 | -4.572200000 | 2.097132000   | -1.100127000 |
| 1 | -4.300213000 | 3.617230000   | 1.926483000  |
| 1 | -5.219916000 | 2.028746000   | -1.969270000 |
| 6 | -4.932262000 | 2.925086000   | -0.022330000 |
| 6 | -2.521297000 | -1.435479000  | 0.003442000  |
| 6 | -3.406837000 | -1.319056000  | 1.085169000  |
| 6 | -2.896998000 | -2.258080000  | -1.068730000 |
| 1 | -3.139068000 | -0.688671000  | 1.927687000  |
| 1 | -2.228913000 | -2.365155000  | -1.917942000 |
| 6 | -4.620944000 | -2.000738000  | 1.096990000  |
| 6 | -4.111640000 | -2.939154000  | -1.060431000 |
| 1 | -5.268263000 | -1.912979000  | 1.964731000  |
| 1 | -4.384516000 | -3.544362000  | -1.920062000 |
| 6 | -4.999279000 | -2.825889000  | 0.023726000  |
| 6 | -0.014437000 | -2.923679000  | -0.007740000 |
| 6 | -0.573142000 | -3.641508000  | 1.060260000  |
| 6 | 0.525235000  | -3.651832000  | -1.078450000 |
| 1 | -1.013527000 | -3.101775000  | 1.892979000  |
| 1 | 0.979448000  | -3.120381000  | -1.909146000 |
| 6 | -0.588199000 | -5.033858000  | 1.060870000  |
| 6 | 0.503515000  | -5.044208000  | -1.084386000 |
| 1 | -1.049536000 | -5.557082000  | 1.893385000  |
| 1 | 0.950613000  | -5.576513000  | -1.918947000 |
| 6 | -0.051915000 | -5.765130000  | -0.013141000 |
| 6 | 2.529066000  | -1.494328000  | -0.009087000 |
| 6 | 3.430679000  | -1.382011000  | -1.078128000 |
| 6 | 2.872430000  | -2.344308000  | 1.053016000  |
| 1 | 3.197362000  | -0.717311000  | -1.904235000 |
| 1 | 2.184034000  | -2.463498000  | 1.884034000  |
| 6 | 4.626615000  | -2.095321000  | -1.088611000 |
| 6 | 4.072481000  | -3.050938000  | 1.049947000  |
| 1 | 5.311168000  | -1.967035000  | -1.922085000 |
| 1 | 4.295606000  | -3.717168000  | 1.878284000  |

|   |              |              |              |
|---|--------------|--------------|--------------|
| 6 | 4.974447000  | -2.943457000 | -0.022888000 |
| 6 | 2.558607000  | 1.423471000  | 0.006522000  |
| 6 | 3.454376000  | 1.296569000  | 1.078614000  |
| 6 | 2.920324000  | 2.265019000  | -1.056121000 |
| 1 | 3.206055000  | 0.638091000  | 1.905395000  |
| 1 | 2.237008000  | 2.394995000  | -1.889680000 |
| 6 | 4.663132000  | 1.987903000  | 1.091232000  |
| 6 | 4.132425000  | 2.950486000  | -1.050149000 |
| 1 | 5.343005000  | 1.848855000  | 1.926793000  |
| 1 | 4.369802000  | 3.611513000  | -1.878655000 |
| 6 | 5.029069000  | 2.828263000  | 0.025492000  |
| 6 | -6.292690000 | -3.554866000 | 0.036049000  |
| 6 | -6.429148000 | -4.830021000 | -0.539407000 |
| 6 | -7.658467000 | -5.477858000 | -0.508888000 |
| 7 | -8.752630000 | -4.942837000 | 0.060463000  |
| 6 | -8.636289000 | -3.725472000 | 0.618650000  |
| 6 | -7.445914000 | -3.007823000 | 0.625028000  |
| 1 | -5.577765000 | -5.330590000 | -0.988237000 |
| 1 | -7.790897000 | -6.462183000 | -0.946589000 |
| 1 | -9.539461000 | -3.325694000 | 1.068579000  |
| 1 | -7.426876000 | -2.017714000 | 1.068090000  |
| 6 | -6.209531000 | 3.681925000  | -0.030078000 |
| 6 | -7.368761000 | 3.173640000  | -0.642270000 |
| 6 | -8.543972000 | 3.915135000  | -0.631196000 |
| 7 | -8.642284000 | 5.122278000  | -0.046213000 |
| 6 | -7.542468000 | 5.620111000  | 0.546766000  |
| 6 | -6.327277000 | 4.946274000  | 0.573764000  |
| 1 | -7.367401000 | 2.193720000  | -1.107549000 |
| 1 | -9.449610000 | 3.542157000  | -1.098727000 |
| 1 | -7.655893000 | 6.596247000  | 1.007619000  |
| 1 | -5.471994000 | 5.418817000  | 1.044890000  |
| 6 | 0.095661000  | 7.229646000  | -0.019406000 |
| 6 | -0.937944000 | 7.979226000  | -0.607454000 |
| 6 | -0.883000000 | 9.367825000  | -0.593291000 |
| 7 | 0.125944000  | 10.053741000 | -0.028632000 |
| 6 | 1.120650000  | 9.350173000  | 0.539714000  |
| 6 | 1.145554000  | 7.960620000  | 0.562662000  |
| 1 | -1.795127000 | 7.487312000  | -1.054958000 |
| 1 | -1.667114000 | 9.970219000  | -1.040919000 |
| 1 | 1.918538000  | 9.936143000  | 0.984237000  |
| 1 | 1.993019000  | 7.453753000  | 1.011785000  |
| 6 | 6.320742000  | 3.560502000  | 0.035249000  |
| 6 | 7.048320000  | 3.791727000  | -1.145646000 |
| 6 | 8.255748000  | 4.477895000  | -1.092237000 |
| 7 | 8.778811000  | 4.940773000  | 0.055143000  |
| 6 | 8.095581000  | 4.730418000  | 1.192399000  |
| 6 | 6.880476000  | 4.056717000  | 1.226049000  |
| 1 | 6.691807000  | 3.417862000  | -2.099513000 |
| 1 | 8.845109000  | 4.665598000  | -1.984829000 |
| 1 | 8.551054000  | 5.130129000  | 2.093573000  |
| 1 | 6.363420000  | 3.941465000  | 2.172737000  |
| 6 | 6.253043000  | -3.698251000 | -0.030110000 |
| 6 | 6.806451000  | -4.205159000 | -1.219579000 |
| 6 | 8.009342000  | -4.899981000 | -1.184012000 |
| 7 | 8.688077000  | -5.121809000 | -0.045509000 |
| 6 | 8.170785000  | -4.648383000 | 1.100887000  |
| 6 | 6.975382000  | -3.941664000 | 1.151790000  |
| 1 | 6.292871000  | -4.082015000 | -2.167088000 |
| 1 | 8.457745000  | -5.308533000 | -2.084708000 |

|   |              |               |              |
|---|--------------|---------------|--------------|
| 1 | 8.755218000  | -4.844644000  | 1.994805000  |
| 1 | 6.624292000  | -3.560969000  | 2.104938000  |
| 6 | -0.073358000 | -7.249709000  | -0.015949000 |
| 6 | -0.246159000 | -7.984160000  | -1.202560000 |
| 6 | -0.262984000 | -9.373204000  | -1.161022000 |
| 7 | -0.122522000 | -10.067882000 | -0.020105000 |
| 6 | 0.044340000  | -9.381950000  | 1.122598000  |
| 6 | 0.076328000  | -7.993265000  | 1.168136000  |
| 1 | -0.392432000 | -7.479340000  | -2.151564000 |
| 1 | -0.401227000 | -9.969433000  | -2.058087000 |
| 1 | 0.162412000  | -9.984776000  | 2.018179000  |
| 1 | 0.241472000  | -7.496729000  | 2.118373000  |

**c-P6-T6<sup>+4</sup>** optimized with **CAM-B3LYP** - E=-23378.852940au

|    |              |              |              |
|----|--------------|--------------|--------------|
| 6  | 12.575933000 | 2.299620000  | 1.543684000  |
| 6  | 13.020926000 | 1.759501000  | 2.796467000  |
| 6  | 12.789911000 | 2.722619000  | 3.723636000  |
| 6  | 12.169650000 | 3.827824000  | 3.035953000  |
| 7  | 12.074248000 | 3.525679000  | 1.680111000  |
| 1  | 13.490196000 | 0.795947000  | 2.931944000  |
| 1  | 13.036450000 | 2.700769000  | 4.774057000  |
| 6  | 11.739810000 | 5.001857000  | 3.627111000  |
| 6  | 11.137656000 | 6.092199000  | 2.930179000  |
| 6  | 10.561720000 | 7.239462000  | 3.563456000  |
| 7  | 10.991462000 | 6.171398000  | 1.580466000  |
| 6  | 10.056968000 | 8.021751000  | 2.566528000  |
| 1  | 10.539432000 | 7.428405000  | 4.625481000  |
| 6  | 10.342535000 | 7.345758000  | 1.343124000  |
| 1  | 9.558289000  | 8.975746000  | 2.654287000  |
| 6  | 10.020632000 | 7.843722000  | 0.057782000  |
| 6  | 10.431392000 | 7.293794000  | -1.178869000 |
| 6  | 10.227731000 | 7.916314000  | -2.446890000 |
| 7  | 11.096349000 | 6.112769000  | -1.321582000 |
| 6  | 10.798045000 | 7.094075000  | -3.372920000 |
| 1  | 9.734161000  | 8.863262000  | -2.608574000 |
| 6  | 11.330378000 | 5.976424000  | -2.653377000 |
| 1  | 10.845526000 | 7.236458000  | -4.441340000 |
| 6  | 11.974458000 | 4.858178000  | -3.262475000 |
| 6  | 12.357223000 | 3.708387000  | -2.595387000 |
| 6  | 13.029714000 | 2.580360000  | -3.189743000 |
| 7  | 12.163701000 | 3.460760000  | -1.238549000 |
| 6  | 13.198482000 | 1.658401000  | -2.208652000 |
| 1  | 13.352433000 | 2.517470000  | -4.217623000 |
| 6  | 12.661750000 | 2.245827000  | -1.014756000 |
| 1  | 13.682100000 | 0.694455000  | -2.269760000 |
| 6  | 12.694016000 | 1.604065000  | 0.281495000  |
| 30 | 11.201828000 | 4.670691000  | 0.165670000  |
| 6  | 12.836493000 | 0.262848000  | 0.308928000  |
| 6  | 12.808323000 | -0.984371000 | 0.308335000  |
| 6  | 9.191376000  | 8.973378000  | 0.005771000  |
| 6  | 8.309736000  | 9.812356000  | -0.039007000 |
| 6  | 1.618392000  | 12.584143000 | -3.641032000 |
| 6  | 0.372585000  | 12.674884000 | -3.012329000 |
| 6  | 2.830590000  | 12.359428000 | -2.972789000 |
| 6  | -0.878834000 | 12.910649000 | -3.694246000 |
| 7  | 0.145533000  | 12.555611000 | -1.663495000 |
| 6  | 4.098215000  | 12.143768000 | -3.631597000 |



|    |               |              |              |
|----|---------------|--------------|--------------|
| 7  | 2.988454000   | 12.248546000 | -1.617881000 |
| 6  | -1.851163000  | 12.898494000 | -2.750543000 |
| 1  | -0.987252000  | 13.081919000 | -4.754373000 |
| 6  | -1.189001000  | 12.696972000 | -1.487696000 |
| 30 | 1.504824000   | 12.054747000 | -0.184721000 |
| 6  | 5.005764000   | 11.884176000 | -2.660073000 |
| 1  | 4.260342000   | 12.180779000 | -4.698005000 |
| 6  | 4.296133000   | 11.963560000 | -1.409378000 |
| 1  | -2.911835000  | 13.058752000 | -2.879310000 |
| 6  | -1.841958000  | 12.697090000 | -0.234863000 |
| 7  | 2.954097000   | 12.277096000 | 1.276851000  |
| 7  | 0.117584000   | 12.634201000 | 1.237957000  |
| 1  | 6.061211000   | 11.679960000 | -2.766846000 |
| 6  | 4.890367000   | 11.781288000 | -0.142986000 |
| 6  | -1.212253000  | 12.751909000 | 1.029218000  |
| 6  | -3.238497000  | 12.562629000 | -0.242658000 |
| 6  | 4.269924000   | 11.998500000 | 1.106574000  |
| 6  | 2.765198000   | 12.441195000 | 2.623191000  |
| 6  | 0.311935000   | 12.791630000 | 2.587411000  |
| 6  | 6.192954000   | 11.251151000 | -0.118234000 |
| 6  | -1.905193000  | 12.994952000 | 2.269328000  |
| 6  | -4.428155000  | 12.292612000 | -0.233771000 |
| 6  | 4.948811000   | 11.963193000 | 2.374837000  |
| 6  | 4.016302000   | 12.250720000 | 3.316669000  |
| 6  | 1.538841000   | 12.705106000 | 3.251073000  |
| 6  | -0.955879000  | 13.045861000 | 3.233392000  |
| 6  | 7.252875000   | 10.651729000 | -0.083783000 |
| 1  | -2.969482000  | 13.151589000 | 2.368358000  |
| 1  | 6.002823000   | 11.771144000 | 2.513490000  |
| 1  | 4.154830000   | 12.327777000 | 4.384318000  |
| 1  | -1.089200000  | 13.249843000 | 4.284832000  |
| 6  | -12.525955000 | 2.253148000  | 0.238276000  |
| 6  | -12.691502000 | 0.956479000  | 0.255693000  |
| 6  | -12.254811000 | 3.468749000  | 0.205234000  |
| 6  | -12.734109000 | -0.288551000 | 0.255622000  |
| 6  | -11.799066000 | 4.739832000  | 0.153125000  |
| 6  | -12.615120000 | -1.635172000 | 0.236234000  |
| 6  | -11.574952000 | 5.323878000  | -1.147952000 |
| 6  | -11.546780000 | 5.412383000  | 1.408189000  |
| 6  | -12.553317000 | -2.280420000 | -1.055070000 |
| 6  | -12.519077000 | -2.320652000 | 1.503751000  |
| 6  | -12.076057000 | 4.773561000  | -2.371513000 |
| 7  | -10.885678000 | 6.451055000  | -1.356666000 |
| 6  | -12.130670000 | 5.016297000  | 2.659062000  |
| 7  | -10.752114000 | 6.471403000  | 1.542124000  |
| 7  | -12.149409000 | -3.535848000 | -1.249306000 |
| 6  | -12.914361000 | -1.637368000 | -2.286937000 |
| 7  | -12.094073000 | -3.579070000 | 1.644831000  |
| 6  | -12.852853000 | -1.726233000 | 2.765084000  |
| 6  | -11.684481000 | 5.625067000  | -3.355690000 |
| 1  | -12.668194000 | 3.874491000  | -2.459696000 |
| 6  | -10.939267000 | 6.681298000  | -2.724808000 |
| 30 | -9.619467000  | 7.370875000  | 0.023066000  |
| 6  | -11.666881000 | 5.893359000  | 3.583278000  |
| 1  | -12.832601000 | 4.206357000  | 2.794232000  |
| 6  | -10.774408000 | 6.794842000  | 2.895539000  |
| 6  | -12.235271000 | -3.754608000 | -2.619573000 |
| 30 | -11.166266000 | -4.729415000 | 0.164115000  |
| 6  | -12.721758000 | -2.559239000 | -3.262474000 |

|    |               |               |              |
|----|---------------|---------------|--------------|
| 1  | -13.281824000 | -0.626239000  | -2.382757000 |
| 6  | -12.151932000 | -3.849428000  | 3.006310000  |
| 6  | -12.628114000 | -2.682339000  | 3.702683000  |
| 1  | -13.227084000 | -0.722822000  | 2.906485000  |
| 1  | -11.880634000 | 5.545483000   | -4.413927000 |
| 6  | -10.344870000 | 7.745501000   | -3.389966000 |
| 7  | -9.176681000  | 8.751933000   | -1.462028000 |
| 7  | -9.059996000  | 8.783378000   | 1.436543000  |
| 1  | -11.918250000 | 5.943612000   | 4.631564000  |
| 6  | -10.045282000 | 7.807767000   | 3.487128000  |
| 6  | -11.857381000 | -4.911669000  | -3.276513000 |
| 7  | -11.015327000 | -6.170687000  | -1.321337000 |
| 7  | -11.001952000 | -6.231943000  | 1.586800000  |
| 1  | -12.884875000 | -2.444139000  | -4.323054000 |
| 6  | -11.772183000 | -5.037985000  | 3.609002000  |
| 1  | -12.769055000 | -2.607135000  | 4.770020000  |
| 6  | -9.521042000  | 8.728987000   | -2.780478000 |
| 6  | -8.356038000  | 9.824238000   | -1.312351000 |
| 6  | -9.184807000  | 8.708671000   | 2.787721000  |
| 6  | -8.147206000  | 9.771069000   | 1.200256000  |
| 6  | -11.277871000 | -6.054194000  | -2.652251000 |
| 6  | -10.481641000 | -7.413834000  | -1.155380000 |
| 6  | -10.461703000 | -7.461353000  | 1.365963000  |
| 6  | -11.222829000 | -6.160111000  | 2.928457000  |
| 6  | -8.928950000  | 9.836864000   | -3.468883000 |
| 6  | -8.177767000  | 10.509079000  | -2.551315000 |
| 6  | -7.776531000  | 10.232202000  | -0.084335000 |
| 6  | -8.318868000  | 9.653251000   | 3.423950000  |
| 6  | -7.662363000  | 10.314088000  | 2.426952000  |
| 6  | -10.915827000 | -7.255855000  | -3.339265000 |
| 6  | -10.393765000 | -8.099227000  | -2.402877000 |
| 6  | -10.127951000 | -7.981332000  | 0.092741000  |
| 6  | -10.336696000 | -8.190421000  | 2.586551000  |
| 6  | -10.837181000 | -7.384270000  | 3.564507000  |
| 1  | -9.076916000  | 10.085147000  | -4.508220000 |
| 1  | -7.593578000  | 11.406559000  | -2.692970000 |
| 6  | -6.723901000  | 11.151942000  | -0.152262000 |
| 1  | -8.221333000  | 9.800959000   | 4.488242000  |
| 1  | -6.939662000  | 11.111607000  | 2.517510000  |
| 1  | -11.060925000 | -7.448605000  | -4.390715000 |
| 1  | -10.029598000 | -9.106861000  | -2.539673000 |
| 6  | -9.360139000  | -9.152241000  | 0.061517000  |
| 1  | -9.960421000  | -9.198722000  | 2.678244000  |
| 1  | -10.949917000 | -7.612559000  | 4.612762000  |
| 6  | -5.660906000  | 11.747663000  | -0.199057000 |
| 6  | -8.484378000  | -9.999606000  | 0.025325000  |
| 6  | -7.427672000  | -10.837062000 | -0.018238000 |
| 6  | -6.337498000  | -11.382151000 | -0.059341000 |
| 6  | -5.012467000  | -11.844403000 | -0.105711000 |
| 6  | -4.369477000  | -12.065031000 | 1.132199000  |
| 6  | -4.428081000  | -11.976733000 | -1.385021000 |
| 6  | -5.054323000  | -12.154514000 | 2.396638000  |
| 7  | -3.041986000  | -12.267955000 | 1.291685000  |
| 7  | -3.109142000  | -12.163287000 | -1.619902000 |
| 6  | -5.171197000  | -11.986893000 | -2.618820000 |
| 6  | -4.109824000  | -12.441910000 | 3.323865000  |
| 1  | -6.120906000  | -12.054429000 | 2.536191000  |
| 6  | -2.842606000  | -12.488136000 | 2.630989000  |
| 30 | -1.620757000  | -12.037702000 | -0.190764000 |

|    |              |               |              |
|----|--------------|---------------|--------------|
| 6  | -2.973243000 | -12.300805000 | -2.978660000 |
| 6  | -4.271452000 | -12.212731000 | -3.606270000 |
| 1  | -6.243332000 | -11.882700000 | -2.701322000 |
| 1  | -4.250226000 | -12.623341000 | 4.378519000  |
| 6  | -1.604755000 | -12.709783000 | 3.244837000  |
| 7  | -0.212197000 | -12.609028000 | 1.212232000  |
| 7  | -0.281218000 | -12.524474000 | -1.693035000 |
| 6  | -1.765622000 | -12.487932000 | -3.661434000 |
| 1  | -4.461905000 | -12.328625000 | -4.662332000 |
| 6  | -0.378257000 | -12.741006000 | 2.565763000  |
| 6  | 1.122476000  | -12.636739000 | 0.985848000  |
| 6  | 1.062529000  | -12.561325000 | -1.531874000 |
| 6  | -0.509788000 | -12.566383000 | -3.042671000 |
| 6  | 0.911707000  | -12.857085000 | 3.204626000  |
| 6  | 1.843804000  | -12.781239000 | 2.223713000  |
| 6  | 1.727763000  | -12.551292000 | -0.287006000 |
| 6  | 1.725776000  | -12.623775000 | -2.808728000 |
| 6  | 0.749018000  | -12.638463000 | -3.747708000 |
| 1  | 1.073241000  | -12.977458000 | 4.265028000  |
| 1  | 2.918424000  | -12.839422000 | 2.316658000  |
| 6  | 3.120299000  | -12.360588000 | -0.309904000 |
| 1  | 2.795106000  | -12.671675000 | -2.954673000 |
| 1  | 0.860787000  | -12.688361000 | -4.820107000 |
| 6  | 4.299999000  | -12.055785000 | -0.307833000 |
| 6  | 5.540410000  | -11.524929000 | -0.280430000 |
| 6  | 6.615025000  | -10.952430000 | -0.239742000 |
| 6  | 7.714890000  | -10.087145000 | -0.171596000 |
| 6  | 8.175075000  | -9.739288000  | 1.121512000  |
| 6  | 8.243163000  | -9.622225000  | -1.399547000 |
| 6  | 7.733889000  | -10.358838000 | 2.329009000  |
| 7  | 9.111118000  | -8.784732000  | 1.382021000  |
| 7  | 9.195421000  | -8.654903000  | -1.516861000 |
| 6  | 7.876238000  | -10.128774000 | -2.681524000 |
| 6  | 8.433690000  | -9.768912000  | 3.339611000  |
| 1  | 7.003154000  | -11.151171000 | 2.396723000  |
| 6  | 9.281995000  | -8.789116000  | 2.730943000  |
| 30 | 9.682897000  | -7.338992000  | 0.009186000  |
| 6  | 9.455038000  | -8.546389000  | -2.847180000 |
| 6  | 8.641865000  | -9.459644000  | -3.591166000 |
| 1  | 7.149435000  | -10.906638000 | -2.863978000 |
| 1  | 8.370915000  | -9.979431000  | 4.395921000  |
| 6  | 10.142086000 | -7.908932000  | 3.451626000  |
| 7  | 10.816040000 | -6.494037000  | 1.546979000  |
| 7  | 10.931201000 | -6.387791000  | -1.368740000 |
| 6  | 10.376696000 | -7.624648000  | -3.429116000 |
| 1  | 8.647039000  | -9.578545000  | -4.663534000 |
| 6  | 10.845234000 | -6.856330000  | 2.890880000  |
| 6  | 11.617589000 | -5.435179000  | 1.437186000  |
| 6  | 11.719320000 | -5.344096000  | -1.119044000 |
| 6  | 11.053286000 | -6.639932000  | -2.732790000 |
| 6  | 11.733499000 | -5.970157000  | 3.599499000  |
| 6  | 12.196312000 | -5.068202000  | 2.696569000  |
| 6  | 11.905777000 | -4.759466000  | 0.191452000  |
| 6  | 12.389824000 | -4.882976000  | -2.300844000 |
| 6  | 11.993426000 | -5.707331000  | -3.302901000 |
| 1  | 11.988471000 | -6.047339000  | 4.645278000  |
| 1  | 12.899876000 | -4.263314000  | 2.852096000  |
| 6  | 12.374047000 | -3.495999000  | 0.251681000  |
| 1  | 13.102120000 | -4.071874000  | -2.340967000 |

|   |              |               |              |
|---|--------------|---------------|--------------|
| 1 | 12.322059000 | -5.702645000  | -4.330819000 |
| 6 | 12.648440000 | -2.279517000  | 0.288679000  |
| 6 | 10.273717000 | -8.141846000  | 4.913627000  |
| 6 | 9.892992000  | -7.159723000  | 5.832010000  |
| 6 | 10.786019000 | -9.354476000  | 5.385381000  |
| 1 | 9.485010000  | -6.221070000  | 5.470160000  |
| 1 | 11.087309000 | -10.119366000 | 4.676972000  |
| 6 | 10.021852000 | -7.386049000  | 7.196531000  |
| 6 | 10.927353000 | -9.572079000  | 6.749338000  |
| 1 | 9.715106000  | -6.620219000  | 7.901495000  |
| 1 | 11.340745000 | -10.510396000 | 7.103856000  |
| 6 | 10.543031000 | -8.590226000  | 7.657321000  |
| 1 | 10.650092000 | -8.764329000  | 8.722891000  |
| 6 | 10.604146000 | -7.734706000  | -4.893953000 |
| 6 | 11.133083000 | -8.911356000  | -5.433463000 |
| 6 | 10.295912000 | -6.671998000  | -5.747444000 |
| 1 | 11.378098000 | -9.738600000  | -4.775166000 |
| 1 | 9.875433000  | -5.760834000  | -5.333404000 |
| 6 | 11.362050000 | -9.014918000  | -6.798954000 |
| 6 | 10.512520000 | -6.784016000  | -7.115114000 |
| 1 | 11.787507000 | -9.926600000  | -7.204962000 |
| 1 | 10.261741000 | -5.956156000  | -7.770362000 |
| 6 | 11.049593000 | -7.953323000  | -7.642533000 |
| 1 | 11.224960000 | -8.038319000  | -8.709889000 |
| 6 | 11.897722000 | 5.147610000   | 5.098257000  |
| 6 | 11.258896000 | 4.268150000   | 5.976346000  |
| 6 | 12.694053000 | 6.172339000   | 5.618719000  |
| 1 | 10.632358000 | 3.477058000   | 5.576155000  |
| 1 | 13.196080000 | 6.855835000   | 4.941564000  |
| 6 | 11.413272000 | 4.410960000   | 7.349596000  |
| 6 | 12.857874000 | 6.303859000   | 6.991205000  |
| 1 | 10.906302000 | 3.727695000   | 8.023188000  |
| 1 | 13.490532000 | 7.092951000   | 7.383772000  |
| 6 | 12.215833000 | 5.425934000   | 7.859101000  |
| 1 | 12.341803000 | 5.533403000   | 8.931389000  |
| 6 | 12.236521000 | 4.944009000   | -4.723126000 |
| 6 | 11.663968000 | 4.026033000   | -5.607591000 |
| 6 | 13.066048000 | 5.950422000   | -5.227463000 |
| 1 | 11.011200000 | 3.249515000   | -5.221044000 |
| 1 | 13.516890000 | 6.663724000   | -4.545084000 |
| 6 | 11.915746000 | 4.113118000   | -6.971005000 |
| 6 | 13.327476000 | 6.026126000   | -6.588948000 |
| 1 | 11.459017000 | 3.400737000   | -7.650335000 |
| 1 | 13.984942000 | 6.801579000   | -6.967663000 |
| 6 | 12.750807000 | 5.110167000   | -7.463415000 |
| 1 | 12.952650000 | 5.174311000   | -8.527539000 |
| 6 | 1.549335000  | 12.895735000  | 4.730707000  |
| 6 | 2.193618000  | 14.000371000  | 5.292556000  |
| 6 | 0.919042000  | 11.978396000  | 5.574113000  |
| 1 | 2.680127000  | 14.719944000  | 4.641524000  |
| 1 | 0.418951000  | 11.117066000  | 5.141493000  |
| 6 | 2.203321000  | 14.185419000  | 6.669791000  |
| 6 | 0.932021000  | 12.161958000  | 6.951601000  |
| 1 | 2.699843000  | 15.052773000  | 7.092568000  |
| 1 | 0.440627000  | 11.440482000  | 7.596865000  |
| 6 | 1.573314000  | 13.266424000  | 7.502294000  |
| 1 | 1.580539000  | 13.412366000  | 8.577592000  |
| 6 | 1.663922000  | 12.727769000  | -5.125005000 |
| 6 | 1.056478000  | 11.782360000  | -5.954145000 |

|   |               |               |              |
|---|---------------|---------------|--------------|
| 6 | 2.318130000   | 13.816688000  | -5.705904000 |
| 1 | 0.549970000   | 10.932278000  | -5.507027000 |
| 1 | 2.787077000   | 14.557919000  | -5.066407000 |
| 6 | 1.101456000   | 11.922869000  | -7.335956000 |
| 6 | 2.359770000   | 13.958804000  | -7.087585000 |
| 1 | 0.628139000   | 11.179510000  | -7.969761000 |
| 1 | 2.863704000   | 14.814314000  | -7.525444000 |
| 6 | 1.752221000   | 13.012084000  | -7.905594000 |
| 1 | 1.784527000   | 13.124400000  | -8.984454000 |
| 6 | -10.147903000 | 7.981387000   | 4.959813000  |
| 6 | -10.632942000 | 9.180101000   | 5.492283000  |
| 6 | -9.767480000  | 6.954523000   | 5.828041000  |
| 1 | -10.934320000 | 9.979463000   | 4.822997000  |
| 1 | -9.380411000  | 6.026914000   | 5.418225000  |
| 6 | -10.748094000 | 9.340503000   | 6.866550000  |
| 6 | -9.870059000  | 7.123598000   | 7.203164000  |
| 1 | -11.140941000 | 10.268547000  | 7.268371000  |
| 1 | -9.564129000  | 6.323166000   | 7.868992000  |
| 6 | -10.364273000 | 8.314341000   | 7.724475000  |
| 1 | -10.451033000 | 8.443576000   | 8.798275000  |
| 6 | -10.591026000 | 7.870188000   | -4.851013000 |
| 6 | -9.532987000  | 7.797008000   | -5.761627000 |
| 6 | -11.890000000 | 8.066497000   | -5.328413000 |
| 1 | -8.522873000  | 7.642949000   | -5.395354000 |
| 1 | -12.712507000 | 8.136526000   | -4.623947000 |
| 6 | -9.772569000  | 7.910104000   | -7.124638000 |
| 6 | -12.124307000 | 8.194135000   | -6.691786000 |
| 1 | -8.945912000  | 7.842687000   | -7.824386000 |
| 1 | -13.134548000 | 8.361422000   | -7.050275000 |
| 6 | -11.067486000 | 8.112789000   | -7.591978000 |
| 1 | -11.252100000 | 8.210669000   | -8.656683000 |
| 6 | -11.957747000 | -5.156381000  | 5.080467000  |
| 6 | -13.241629000 | -5.111100000  | 5.630157000  |
| 6 | -10.857418000 | -5.315819000  | 5.927151000  |
| 1 | -14.099252000 | -4.998906000  | 4.974635000  |
| 1 | -9.858347000  | -5.350443000  | 5.503957000  |
| 6 | -13.421157000 | -5.229523000  | 7.002846000  |
| 6 | -11.039307000 | -5.420432000  | 7.299852000  |
| 1 | -14.423353000 | -5.206847000  | 7.417805000  |
| 1 | -10.178253000 | -5.535325000  | 7.950237000  |
| 6 | -12.321147000 | -5.381157000  | 7.839868000  |
| 1 | -12.462607000 | -5.471864000  | 8.911788000  |
| 6 | -12.078361000 | -4.978141000  | -4.746250000 |
| 6 | -13.375507000 | -4.919118000  | -5.262465000 |
| 6 | -10.999037000 | -5.102460000  | -5.625269000 |
| 1 | -14.216917000 | -4.834286000  | -4.582316000 |
| 1 | -9.989593000  | -5.147297000  | -5.228454000 |
| 6 | -13.588635000 | -4.988979000  | -6.633703000 |
| 6 | -11.214276000 | -5.158782000  | -6.995913000 |
| 1 | -14.600887000 | -4.955825000  | -7.022744000 |
| 1 | -10.369231000 | -5.246366000  | -7.671096000 |
| 6 | -12.509245000 | -5.105804000  | -7.502497000 |
| 1 | -12.676872000 | -5.158757000  | -8.573177000 |
| 6 | -1.582215000  | -12.915190000 | 4.722081000  |
| 6 | -1.952478000  | -11.888144000 | 5.592974000  |
| 6 | -1.187795000  | -14.144600000 | 5.255146000  |
| 1 | -2.259404000  | -10.930184000 | 5.183657000  |
| 1 | -0.905171000  | -14.948941000 | 4.583272000  |
| 6 | -1.929510000  | -12.085668000 | 6.968310000  |

|   |              |               |              |
|---|--------------|---------------|--------------|
| 6 | -1.168129000 | -14.343051000 | 6.630379000  |
| 1 | -2.217707000 | -11.278560000 | 7.634525000  |
| 1 | -0.868422000 | -15.306141000 | 7.030621000  |
| 6 | -1.538048000 | -13.314075000 | 7.489954000  |
| 1 | -1.523655000 | -13.470524000 | 8.563682000  |
| 6 | -1.812458000 | -12.601576000 | -5.147898000 |
| 6 | -1.445320000 | -13.795481000 | -5.773292000 |
| 6 | -2.221377000 | -11.523784000 | -5.936306000 |
| 1 | -1.132738000 | -14.638993000 | -5.165852000 |
| 1 | -2.506678000 | -10.592672000 | -5.455547000 |
| 6 | -1.490218000 | -13.909364000 | -7.157481000 |
| 6 | -2.262978000 | -11.636590000 | -7.320694000 |
| 1 | -1.210830000 | -14.845703000 | -7.629450000 |
| 1 | -2.580198000 | -10.790430000 | -7.922129000 |
| 6 | -1.898273000 | -12.830237000 | -7.934299000 |
| 1 | -1.934018000 | -12.920564000 | -9.015097000 |
| 6 | -1.094929000 | 0.837333000   | 0.001605000  |
| 6 | 0.202819000  | 1.379925000   | -0.000632000 |
| 6 | -1.274290000 | -0.557521000  | 0.002855000  |
| 6 | 1.323269000  | 0.528798000   | 0.006199000  |
| 6 | -0.154562000 | -1.410117000  | -0.001802000 |
| 6 | 1.144488000  | -0.867401000  | 0.003757000  |
| 6 | 0.386760000  | 2.865703000   | -0.016788000 |
| 6 | 0.962531000  | 3.534052000   | 1.064544000  |
| 6 | -0.015164000 | 3.620570000   | -1.119949000 |
| 1 | 1.283946000  | 2.967423000   | 1.932667000  |
| 1 | -0.465938000 | 3.121873000   | -1.972015000 |
| 6 | 1.129723000  | 4.911845000   | 1.044823000  |
| 6 | 0.155073000  | 4.997450000   | -1.143557000 |
| 1 | 1.555737000  | 5.407300000   | 1.911425000  |
| 1 | -0.141083000 | 5.553758000   | -2.027105000 |
| 6 | 0.730148000  | 5.669036000   | -0.060543000 |
| 6 | -2.284881000 | 1.748319000   | 0.001100000  |
| 6 | -2.545789000 | 2.589411000   | 1.084510000  |
| 6 | -3.162925000 | 1.783903000   | -1.083645000 |
| 1 | -1.876926000 | 2.581836000   | 1.938902000  |
| 1 | -2.982023000 | 1.139446000   | -1.937792000 |
| 6 | -3.645455000 | 3.436142000   | 1.084860000  |
| 6 | -4.261478000 | 2.632344000   | -1.087591000 |
| 1 | -3.833596000 | 4.057292000   | 1.954749000  |
| 1 | -4.906938000 | 2.656595000   | -1.959826000 |
| 6 | -4.524164000 | 3.474826000   | -0.002547000 |
| 6 | -2.658046000 | -1.132941000  | 0.016276000  |
| 6 | -3.504571000 | -0.930672000  | 1.108097000  |
| 6 | -3.137485000 | -1.889603000  | -1.054589000 |
| 1 | -3.155000000 | -0.345862000  | 1.952677000  |
| 1 | -2.497875000 | -2.063455000  | -1.913720000 |
| 6 | -4.783833000 | -1.468340000  | 1.131564000  |
| 6 | -4.416991000 | -2.427578000  | -1.034364000 |
| 1 | -5.405371000 | -1.316964000  | 2.008402000  |
| 1 | -4.767919000 | -2.990866000  | -1.893233000 |
| 6 | -5.264147000 | -2.228100000  | 0.060305000  |
| 6 | -0.347817000 | -2.894965000  | -0.019181000 |
| 6 | -0.972145000 | -3.552709000  | 1.042069000  |
| 6 | 0.087369000  | -3.660429000  | -1.102432000 |
| 1 | -1.333526000 | -2.977607000  | 1.888363000  |
| 1 | 0.590621000  | -3.173730000  | -1.931622000 |
| 6 | -1.154972000 | -4.928289000  | 1.021920000  |
| 6 | -0.099575000 | -5.035362000  | -1.127147000 |

|   |              |              |              |
|---|--------------|--------------|--------------|
| 1 | -1.663828000 | -5.407496000 | 1.852171000  |
| 1 | 0.268250000  | -5.605421000 | -1.974280000 |
| 6 | -0.724303000 | -5.695454000 | -0.064720000 |
| 6 | 2.335377000  | -1.777503000 | 0.005622000  |
| 6 | 3.241489000  | -1.778989000 | -1.056799000 |
| 6 | 2.570591000  | -2.652101000 | 1.068604000  |
| 1 | 3.090202000  | -1.097680000 | -1.887647000 |
| 1 | 1.871493000  | -2.683759000 | 1.897734000  |
| 6 | 4.340260000  | -2.627174000 | -1.059792000 |
| 6 | 3.673070000  | -3.495300000 | 1.072211000  |
| 1 | 5.035661000  | -2.588984000 | -1.892298000 |
| 1 | 3.813482000  | -4.178645000 | 1.903695000  |
| 6 | 4.578154000  | -3.500435000 | 0.006186000  |
| 6 | 2.703688000  | 1.112785000  | 0.022065000  |
| 6 | 3.561458000  | 0.897096000  | 1.102532000  |
| 6 | 3.169200000  | 1.892943000  | -1.038542000 |
| 1 | 3.229663000  | 0.281032000  | 1.931863000  |
| 1 | 2.516268000  | 2.091175000  | -1.881995000 |
| 6 | 4.836583000  | 1.445161000  | 1.125269000  |
| 6 | 4.446608000  | 2.435653000  | -1.022094000 |
| 1 | 5.484849000  | 1.240981000  | 1.971540000  |
| 1 | 4.767766000  | 3.056262000  | -1.852609000 |
| 6 | 5.304306000  | 2.223872000  | 0.062010000  |
| 6 | -6.631088000 | -2.805365000 | 0.086471000  |
| 6 | -6.916436000 | -4.050335000 | -0.483308000 |
| 6 | -8.206553000 | -4.551490000 | -0.439120000 |
| 7 | -9.221950000 | -3.896632000 | 0.138573000  |
| 6 | -8.961006000 | -2.705954000 | 0.692305000  |
| 6 | -7.701296000 | -2.132262000 | 0.684982000  |
| 1 | -6.133706000 | -4.643521000 | -0.941892000 |
| 1 | -8.452459000 | -5.513816000 | -0.875361000 |
| 1 | -9.804112000 | -2.203668000 | 1.154269000  |
| 1 | -7.562634000 | -1.153199000 | 1.128937000  |
| 6 | -5.699522000 | 4.381106000  | -0.004140000 |
| 6 | -6.904313000 | 4.022286000  | -0.617807000 |
| 6 | -7.977614000 | 4.896174000  | -0.597943000 |
| 7 | -7.930612000 | 6.094604000  | -0.002392000 |
| 6 | -6.783473000 | 6.450573000  | 0.590426000  |
| 6 | -5.662286000 | 5.638109000  | 0.608278000  |
| 1 | -7.018524000 | 3.055669000  | -1.094675000 |
| 1 | -8.919904000 | 4.638688000  | -1.069796000 |
| 1 | -6.776145000 | 7.427957000  | 1.061295000  |
| 1 | -4.756942000 | 5.998599000  | 1.082792000  |
| 6 | 0.911629000  | 7.141593000  | -0.086000000 |
| 6 | -0.018306000 | 7.983519000  | -0.702764000 |
| 6 | 0.192004000  | 9.352448000  | -0.710578000 |
| 7 | 1.257021000  | 9.925576000  | -0.140398000 |
| 6 | 2.151870000  | 9.132061000  | 0.457458000  |
| 6 | 2.021133000  | 7.753828000  | 0.503408000  |
| 1 | -0.915172000 | 7.581048000  | -1.159793000 |
| 1 | -0.509533000 | 10.030946000 | -1.184547000 |
| 1 | 3.000820000  | 9.634372000  | 0.908851000  |
| 1 | 2.795500000  | 7.162450000  | 0.978510000  |
| 6 | 6.669754000  | 2.805366000  | 0.083356000  |
| 6 | 7.432703000  | 2.932094000  | -1.082806000 |
| 6 | 8.704757000  | 3.474451000  | -1.018993000 |
| 7 | 9.257709000  | 3.890294000  | 0.126219000  |
| 6 | 8.539208000  | 3.779967000  | 1.249579000  |
| 6 | 7.259539000  | 3.252390000  | 1.270993000  |

|   |              |              |              |
|---|--------------|--------------|--------------|
| 1 | 7.049215000  | 2.589303000  | -2.036794000 |
| 1 | 9.322231000  | 3.579959000  | -1.905436000 |
| 1 | 9.020173000  | 4.139928000  | 2.153650000  |
| 1 | 6.717981000  | 3.212015000  | 2.208979000  |
| 6 | 5.756652000  | -4.402610000 | 0.006663000  |
| 6 | 6.239165000  | -4.982315000 | -1.171846000 |
| 6 | 7.347633000  | -5.810601000 | -1.129468000 |
| 7 | 7.995872000  | -6.094823000 | 0.006210000  |
| 6 | 7.541314000  | -5.554662000 | 1.142994000  |
| 6 | 6.442347000  | -4.714152000 | 1.185913000  |
| 1 | 5.741476000  | -4.810181000 | -2.119147000 |
| 1 | 7.739668000  | -6.280131000 | -2.026167000 |
| 1 | 8.096754000  | -5.809207000 | 2.040073000  |
| 1 | 6.137864000  | -4.286712000 | 2.134216000  |
| 6 | -0.927443000 | -7.165443000 | -0.091064000 |
| 6 | -1.213310000 | -7.842374000 | -1.280822000 |
| 6 | -1.398256000 | -9.214781000 | -1.262299000 |
| 7 | -1.319695000 | -9.937382000 | -0.141448000 |
| 6 | -1.046868000 | -9.305677000 | 1.003602000  |
| 6 | -0.844056000 | -7.937192000 | 1.072009000  |
| 1 | -1.314213000 | -7.304056000 | -2.216291000 |
| 1 | -1.625502000 | -9.772759000 | -2.165382000 |
| 1 | -0.984484000 | -9.936530000 | 1.884969000  |
| 1 | -0.600057000 | -7.482008000 | 2.025052000  |

**c-P6-T6<sup>+4</sup>** optimized with **M06-2X** - E=-23379.838836au

|   |               |               |              |
|---|---------------|---------------|--------------|
| 6 | -12.116331000 | -4.310802000  | 1.297781000  |
| 6 | -12.686460000 | -3.832494000  | 2.533329000  |
| 6 | -12.328042000 | -4.731313000  | 3.484607000  |
| 6 | -11.505283000 | -5.729069000  | 2.832382000  |
| 7 | -11.419641000 | -5.432823000  | 1.478032000  |
| 1 | -13.316819000 | -2.960273000  | 2.634418000  |
| 1 | -12.612677000 | -4.742449000  | 4.526726000  |
| 6 | -10.904958000 | -6.811891000  | 3.458423000  |
| 6 | -10.108284000 | -7.802163000  | 2.797104000  |
| 6 | -9.356330000  | -8.826160000  | 3.471955000  |
| 7 | -9.915383000  | -7.879081000  | 1.457028000  |
| 6 | -8.695577000  | -9.523500000  | 2.503278000  |
| 1 | -9.329457000  | -8.987336000  | 4.539571000  |
| 6 | -9.064084000  | -8.923897000  | 1.254703000  |
| 1 | -8.039417000  | -10.374350000 | 2.620067000  |
| 6 | -8.627502000  | -9.372803000  | -0.014803000 |
| 6 | -9.080482000  | -8.920585000  | -1.276369000 |
| 6 | -8.724085000  | -9.514230000  | -2.531827000 |
| 7 | -9.934118000  | -7.874724000  | -1.465061000 |
| 6 | -9.393463000  | -8.811760000  | -3.490113000 |
| 1 | -8.067905000  | -10.363543000 | -2.659264000 |
| 6 | -10.137948000 | -7.790224000  | -2.802394000 |
| 1 | -9.375855000  | -8.966415000  | -4.558867000 |
| 6 | -10.937921000 | -6.794951000  | -3.451950000 |
| 6 | -11.528753000 | -5.712639000  | -2.815502000 |
| 6 | -12.359627000 | -4.713020000  | -3.454044000 |
| 7 | -11.427584000 | -5.421474000  | -1.460865000 |
| 6 | -12.709527000 | -3.819293000  | -2.494633000 |
| 1 | -12.655937000 | -4.720185000  | -4.492944000 |
| 6 | -12.125610000 | -4.302186000  | -1.267547000 |
| 1 | -13.343155000 | -2.948255000  | -2.584780000 |



|    |               |               |              |
|----|---------------|---------------|--------------|
| 6  | -12.321647000 | -3.672988000  | 0.018015000  |
| 30 | -10.328664000 | -6.442918000  | 0.001252000  |
| 6  | -12.712522000 | -2.367882000  | 0.022641000  |
| 6  | -12.914398000 | -1.138195000  | 0.023233000  |
| 6  | -7.598658000  | -10.344927000 | -0.021742000 |
| 6  | -6.593954000  | -11.034157000 | -0.024169000 |
| 6  | 0.538005000   | -12.925486000 | -3.434449000 |
| 6  | 1.768952000   | -12.766452000 | -2.800149000 |
| 6  | -0.723076000  | -12.854228000 | -2.784650000 |
| 6  | 3.060004000   | -12.861886000 | -3.452871000 |
| 7  | 1.955599000   | -12.508114000 | -1.457346000 |
| 6  | -1.995177000  | -12.864951000 | -3.470726000 |
| 7  | -0.914091000  | -12.704680000 | -1.447456000 |
| 6  | 4.000526000   | -12.624731000 | -2.504884000 |
| 1  | 3.214441000   | -13.107494000 | -4.493596000 |
| 6  | 3.283974000   | -12.430132000 | -1.265704000 |
| 30 | 0.496373000   | -12.167562000 | -0.006206000 |
| 6  | -2.951665000  | -12.698202000 | -2.519091000 |
| 1  | -2.130419000  | -12.972184000 | -4.537035000 |
| 6  | -2.257697000  | -12.609374000 | -1.260782000 |
| 1  | 5.076660000   | -12.634024000 | -2.607513000 |
| 6  | 3.912135000   | -12.237256000 | 0.001143000  |
| 7  | -0.921697000  | -12.592041000 | 1.461989000  |
| 7  | 1.951740000   | -12.447238000 | 1.463459000  |
| 1  | -4.024581000  | -12.660394000 | -2.645316000 |
| 6  | -2.886814000  | -12.461763000 | -0.005491000 |
| 6  | 3.277173000   | -12.358406000 | 1.273955000  |
| 6  | 5.246623000   | -11.849192000 | -0.005095000 |
| 6  | -2.265511000  | -12.519531000 | 1.263601000  |
| 6  | -0.733449000  | -12.648151000 | 2.808027000  |
| 6  | 1.760141000   | -12.599531000 | 2.820977000  |
| 6  | -4.267077000  | -12.137312000 | -0.017574000 |
| 6  | 3.990936000   | -12.459335000 | 2.527464000  |
| 6  | 6.376667000   | -11.359747000 | -0.005868000 |
| 6  | -2.961847000  | -12.514339000 | 2.522186000  |
| 6  | -2.006306000  | -12.606722000 | 3.487494000  |
| 6  | 0.527031000   | -12.690108000 | 3.462638000  |
| 6  | 3.049197000   | -12.638019000 | 3.485659000  |
| 6  | -5.399510000  | -11.687506000 | -0.022237000 |
| 1  | 5.066489000   | -12.448130000 | 2.635083000  |
| 1  | -4.035238000  | -12.472880000 | 2.643109000  |
| 1  | -2.145796000  | -12.638424000 | 4.558232000  |
| 1  | 3.200161000   | -12.803410000 | 4.542590000  |
| 6  | 12.831364000  | -0.166346000  | 0.016404000  |
| 6  | 12.787468000  | 1.153283000   | 0.019764000  |
| 6  | 12.762880000  | -1.408079000  | 0.005116000  |
| 6  | 12.604759000  | 2.383751000   | 0.016932000  |
| 6  | 12.489482000  | -2.745449000  | -0.008690000 |
| 6  | 12.245989000  | 3.701901000   | 0.011354000  |
| 6  | 12.296446000  | -3.380184000  | -1.286587000 |
| 6  | 12.394549000  | -3.409707000  | 1.273348000  |
| 6  | 12.036199000  | 4.325049000   | -1.272470000 |
| 6  | 12.050688000  | 4.340594000   | 1.289749000  |
| 6  | 12.607756000  | -2.772825000  | -2.545388000 |
| 7  | 11.821521000  | -4.629458000  | -1.446063000 |
| 6  | 12.970412000  | -2.899901000  | 2.487093000  |
| 7  | 11.767484000  | -4.571920000  | 1.470900000  |
| 7  | 11.431349000  | 5.501394000   | -1.450521000 |
| 6  | 12.459778000  | 3.749091000   | -2.525775000 |

|    |              |               |              |
|----|--------------|---------------|--------------|
| 7  | 11.427768000 | 5.511054000   | 1.458481000  |
| 6  | 12.490455000 | 3.787806000   | 2.546428000  |
| 6  | 12.325773000 | -3.710378000  | -3.495470000 |
| 1  | 13.011919000 | -1.779719000  | -2.681818000 |
| 6  | 11.836281000 | -4.870839000  | -2.800955000 |
| 30 | 10.748017000 | -5.690034000  | 0.007158000  |
| 6  | 12.678337000 | -3.813702000  | 3.451454000  |
| 1  | 13.556065000 | -1.995409000  | 2.571577000  |
| 6  | 11.894901000 | -4.849347000  | 2.820193000  |
| 6  | 11.439089000 | 5.736678000   | -2.816695000 |
| 30 | 10.286951000 | 6.498184000   | 0.001191000  |
| 6  | 12.094543000 | 4.633037000   | -3.487618000 |
| 1  | 12.980488000 | 2.808719000   | -2.638397000 |
| 6  | 11.452854000 | 5.770044000   | 2.820000000  |
| 6  | 12.123164000 | 4.682319000   | 3.499548000  |
| 1  | 13.023620000 | 2.855453000   | 2.667793000  |
| 1  | 12.434795000 | -3.619853000  | -4.566331000 |
| 6  | 11.417106000 | -6.062271000  | -3.422226000 |
| 7  | 10.480012000 | -7.184969000  | -1.434628000 |
| 7  | 10.468678000 | -7.147832000  | 1.481583000  |
| 1  | 12.985866000 | -3.804795000  | 4.486894000  |
| 6  | 11.341953000 | -5.953064000  | 3.467569000  |
| 6  | 10.857716000 | 6.823886000   | -3.454671000 |
| 7  | 9.852715000  | 7.912321000   | -1.472229000 |
| 7  | 9.888337000  | 7.946676000   | 1.452741000  |
| 1  | 12.238587000 | 4.550143000   | -4.555122000 |
| 6  | 10.888465000 | 6.875432000   | 3.444618000  |
| 1  | 12.281156000 | 4.617516000   | 4.566371000  |
| 6  | 10.805578000 | -7.152436000  | -2.765143000 |
| 6  | 9.878659000  | -8.373513000  | -1.228549000 |
| 6  | 10.610200000 | -6.997342000  | 2.828372000  |
| 6  | 9.710206000  | -8.261682000  | 1.306948000  |
| 6  | 10.108526000 | 7.853883000   | -2.805034000 |
| 6  | 9.121908000  | 9.046075000   | -1.276831000 |
| 6  | 9.141855000  | 9.067363000   | 1.250359000  |
| 6  | 10.145914000 | 7.902046000   | 2.784747000  |
| 6  | 10.425438000 | -8.389605000  | -3.393842000 |
| 6  | 9.820515000  | -9.145507000  | -2.433202000 |
| 6  | 9.375464000  | -8.818415000  | 0.038248000  |
| 6  | 9.904407000  | -8.037126000  | 3.522603000  |
| 6  | 9.332875000  | -8.826752000  | 2.565556000  |
| 6  | 9.539251000  | 8.992625000   | -3.473779000 |
| 6  | 8.897300000  | 9.724896000   | -2.518272000 |
| 6  | 8.706071000  | 9.530441000   | -0.012953000 |
| 6  | 8.919176000  | 9.760236000   | 2.486065000  |
| 6  | 9.572119000  | 9.045451000   | 3.445244000  |
| 1  | 10.617142000 | -8.657610000  | -4.422343000 |
| 1  | 9.416620000  | -10.144390000 | -2.518909000 |
| 6  | 8.466264000  | -9.866854000  | 0.019367000  |
| 1  | 9.847958000  | -8.152149000  | 4.595049000  |
| 1  | 8.738622000  | -9.719490000  | 2.700069000  |
| 1  | 9.639147000  | 9.220402000   | -4.524652000 |
| 1  | 8.368815000  | 10.660899000  | -2.632538000 |
| 6  | 7.730589000  | 10.554571000  | -0.015670000 |
| 1  | 8.380645000  | 10.691350000  | 2.592708000  |
| 1  | 9.673769000  | 9.283973000   | 4.493509000  |
| 6  | 7.499884000  | -10.628908000 | 0.002520000  |
| 6  | 6.728770000  | 11.249165000  | -0.018781000 |
| 6  | 5.527425000  | 11.888134000  | -0.021931000 |

|    |               |              |              |
|----|---------------|--------------|--------------|
| 6  | 4.374046000   | 12.282991000 | -0.024069000 |
| 6  | 2.978376000   | 12.524986000 | -0.026664000 |
| 6  | 2.349423000   | 12.611231000 | 1.236073000  |
| 6  | 2.352404000   | 12.597222000 | -1.292293000 |
| 6  | 3.047343000   | 12.797426000 | 2.481836000  |
| 7  | 1.007031000   | 12.593001000 | 1.438560000  |
| 7  | 1.010525000   | 12.575594000 | -1.497621000 |
| 6  | 3.052379000   | 12.776965000 | -2.537339000 |
| 6  | 2.090999000   | 12.917951000 | 3.440647000  |
| 1  | 4.120034000   | 12.874860000 | 2.590987000  |
| 6  | 0.816546000   | 12.761230000 | 2.777326000  |
| 30 | -0.407885000  | 12.167532000 | -0.029060000 |
| 6  | 0.822162000   | 12.739502000 | -2.837811000 |
| 6  | 2.097676000   | 12.892422000 | -3.498997000 |
| 1  | 4.125167000   | 12.855886000 | -2.644656000 |
| 1  | 2.228877000   | 13.117082000 | 4.493329000  |
| 6  | -0.441068000  | 12.777304000 | 3.430740000  |
| 7  | -1.858264000  | 12.497451000 | 1.430503000  |
| 7  | -1.855789000  | 12.495081000 | -1.492218000 |
| 6  | -0.435133000  | 12.757146000 | -3.492310000 |
| 1  | 2.237687000   | 13.087225000 | -4.552230000 |
| 6  | -1.672906000  | 12.628286000 | 2.788415000  |
| 6  | -3.176989000  | 12.313687000 | 1.239475000  |
| 6  | -3.174568000  | 12.311560000 | -1.302789000 |
| 6  | -1.667959000  | 12.616628000 | -2.850375000 |
| 6  | -2.952845000  | 12.520955000 | 3.461201000  |
| 6  | -3.886172000  | 12.315531000 | 2.498925000  |
| 6  | -3.798988000  | 12.148369000 | -0.032082000 |
| 6  | -3.881969000  | 12.307902000 | -2.563453000 |
| 6  | -2.946974000  | 12.507704000 | -3.525005000 |
| 1  | -3.102487000  | 12.586622000 | 4.529252000  |
| 1  | -4.954285000  | 12.195869000 | 2.613711000  |
| 6  | -5.122932000  | 11.712867000 | -0.031909000 |
| 1  | -4.949926000  | 12.187794000 | -2.679279000 |
| 1  | -3.094589000  | 12.567354000 | -4.593680000 |
| 6  | -6.238979000  | 11.197302000 | -0.028795000 |
| 6  | -7.366975000  | 10.469463000 | -0.024698000 |
| 6  | -8.341892000  | 9.721134000  | -0.020005000 |
| 6  | -9.292195000  | 8.705680000  | -0.015374000 |
| 6  | -9.727880000  | 8.232717000  | 1.260174000  |
| 6  | -9.722942000  | 8.217752000  | -1.286964000 |
| 6  | -9.423261000  | 8.870562000  | 2.504847000  |
| 7  | -10.493729000 | 7.132376000  | 1.451871000  |
| 7  | -10.489973000 | 7.116078000  | -1.467902000 |
| 6  | -9.416681000  | 8.841703000  | -2.537830000 |
| 6  | -10.038240000 | 8.129289000  | 3.471767000  |
| 1  | -8.836767000  | 9.770761000  | 2.621641000  |
| 6  | -10.699282000 | 7.045466000  | 2.797958000  |
| 30 | -10.784188000 | 5.656661000  | -0.000700000 |
| 6  | -10.697197000 | 7.016858000  | -2.813009000 |
| 6  | -10.033373000 | 8.091753000  | -3.497497000 |
| 1  | -8.828990000  | 9.739877000  | -2.663868000 |
| 1  | -10.033351000 | 8.298463000  | 4.538482000  |
| 6  | -11.418169000 | 6.006113000  | 3.449483000  |
| 7  | -11.808949000 | 4.573810000  | 1.475913000  |
| 7  | -11.818031000 | 4.564570000  | -1.464883000 |
| 6  | -11.422600000 | 5.974064000  | -3.453246000 |
| 1  | -10.028798000 | 8.250678000  | -4.565802000 |
| 6  | -11.932598000 | 4.866866000  | 2.821997000  |

|   |               |               |              |
|---|---------------|---------------|--------------|
| 6 | -12.433008000 | 3.404373000   | 1.294164000  |
| 6 | -12.440043000 | 3.396295000   | -1.272476000 |
| 6 | -11.941750000 | 4.844770000   | -2.813667000 |
| 6 | -12.693725000 | 3.828762000   | 3.470960000  |
| 6 | -12.985019000 | 2.900103000   | 2.518365000  |
| 6 | -12.581234000 | 2.750093000   | 0.013358000  |
| 6 | -12.994182000 | 2.880972000   | -2.491651000 |
| 6 | -12.704459000 | 3.801019000   | -3.452544000 |
| 1 | -12.993991000 | 3.827691000   | 4.508546000  |
| 1 | -13.562290000 | 1.991876000   | 2.618994000  |
| 6 | -12.880952000 | 1.421855000   | 0.018279000  |
| 1 | -13.570686000 | 1.971350000   | -2.583512000 |
| 1 | -13.005511000 | 3.790498000   | -4.489843000 |
| 6 | -12.958137000 | 0.178424000   | 0.021557000  |
| 6 | -11.629913000 | 6.147992000   | 4.913096000  |
| 6 | -11.162295000 | 5.174103000   | 5.803860000  |
| 6 | -12.309376000 | 7.265577000   | 5.415443000  |
| 1 | -10.623970000 | 4.312885000   | 5.417792000  |
| 1 | -12.683136000 | 8.017735000   | 4.726693000  |
| 6 | -11.368374000 | 5.317153000   | 7.171864000  |
| 6 | -12.528101000 | 7.396464000   | 6.782342000  |
| 1 | -10.992670000 | 4.562949000   | 7.855686000  |
| 1 | -13.071576000 | 8.256223000   | 7.159975000  |
| 6 | -12.055399000 | 6.425248000   | 7.662629000  |
| 1 | -12.223293000 | 6.531822000   | 8.729318000  |
| 6 | -11.634145000 | 6.102197000   | -4.918263000 |
| 6 | -12.309454000 | 7.217237000   | -5.431694000 |
| 6 | -11.169917000 | 5.117830000   | -5.799202000 |
| 1 | -12.680475000 | 7.977615000   | -4.750511000 |
| 1 | -10.634935000 | 4.258501000   | -5.404416000 |
| 6 | -12.527574000 | 7.335380000   | -6.799852000 |
| 6 | -11.375448000 | 5.248083000   | -7.168604000 |
| 1 | -13.067882000 | 8.193327000   | -7.186055000 |
| 1 | -11.002577000 | 4.485686000   | -7.844862000 |
| 6 | -12.058340000 | 6.353750000   | -7.670421000 |
| 1 | -12.225772000 | 6.450387000   | -8.738129000 |
| 6 | -11.082209000 | -6.963431000  | 4.927175000  |
| 6 | -10.664328000 | -5.959320000  | 5.808164000  |
| 6 | -11.676900000 | -8.121851000  | 5.443499000  |
| 1 | -10.190623000 | -5.065655000  | 5.410916000  |
| 1 | -12.010401000 | -8.900219000  | 4.762996000  |
| 6 | -10.839227000 | -6.110217000  | 7.180187000  |
| 6 | -11.861730000 | -8.263910000  | 6.814324000  |
| 1 | -10.504545000 | -5.329672000  | 7.855809000  |
| 1 | -12.338638000 | -9.157675000  | 7.202897000  |
| 6 | -11.441172000 | -7.260253000  | 7.684916000  |
| 1 | -11.583288000 | -7.374876000  | 8.754523000  |
| 6 | -11.131359000 | -6.940265000  | -4.919113000 |
| 6 | -10.722571000 | -5.932865000  | -5.800650000 |
| 6 | -11.732740000 | -8.096130000  | -5.433517000 |
| 1 | -10.243147000 | -5.041441000  | -5.405226000 |
| 1 | -12.059135000 | -8.877074000  | -4.752532000 |
| 6 | -10.912914000 | -6.077960000  | -7.171197000 |
| 6 | -11.933190000 | -8.232306000  | -6.802712000 |
| 1 | -10.584795000 | -5.295108000  | -7.847350000 |
| 1 | -12.415123000 | -9.124100000  | -7.189595000 |
| 6 | -11.521577000 | -7.225389000  | -7.673819000 |
| 1 | -11.675665000 | -7.335524000  | -8.742234000 |
| 6 | 0.516086000   | -12.829474000 | 4.946344000  |

|   |              |               |              |
|---|--------------|---------------|--------------|
| 6 | -0.038064000 | -13.970044000 | 5.539339000  |
| 6 | 1.056304000  | -11.831387000 | 5.764422000  |
| 1 | -0.450906000 | -14.751680000 | 4.907630000  |
| 1 | 1.478533000  | -10.940820000 | 5.306624000  |
| 6 | -0.042757000 | -14.111827000 | 6.923260000  |
| 6 | 1.044793000  | -11.972117000 | 7.148926000  |
| 1 | -0.463117000 | -15.006474000 | 7.371003000  |
| 1 | 1.462619000  | -11.189515000 | 7.774328000  |
| 6 | 0.497414000  | -13.113027000 | 7.730606000  |
| 1 | 0.493060000  | -13.225251000 | 8.809951000  |
| 6 | 0.532854000  | -13.182306000 | -4.901910000 |
| 6 | 1.071883000  | -12.250878000 | -5.796015000 |
| 6 | -0.014354000 | -14.369460000 | -5.403052000 |
| 1 | 1.486846000  | -11.323370000 | -5.410765000 |
| 1 | -0.426601000 | -15.099352000 | -4.711868000 |
| 6 | 1.065969000  | -12.502733000 | -7.164609000 |
| 6 | -0.013073000 | -14.622438000 | -6.770924000 |
| 1 | 1.481874000  | -11.770811000 | -7.849732000 |
| 1 | -0.428079000 | -15.552061000 | -7.146562000 |
| 6 | 0.525890000  | -13.689449000 | -7.654231000 |
| 1 | 0.525745000  | -13.887973000 | -8.721058000 |
| 6 | 11.519751000 | -6.059282000  | 4.938199000  |
| 6 | 12.146505000 | -7.185224000  | 5.488969000  |
| 6 | 11.072509000 | -5.040454000  | 5.788684000  |
| 1 | 12.505096000 | -7.972385000  | 4.831950000  |
| 1 | 10.573226000 | -4.173768000  | 5.364707000  |
| 6 | 12.334725000 | -7.280203000  | 6.863202000  |
| 6 | 11.247239000 | -5.147587000  | 7.164339000  |
| 1 | 12.838611000 | -8.146733000  | 7.278399000  |
| 1 | 10.887495000 | -4.358421000  | 7.816576000  |
| 6 | 11.882566000 | -6.264157000  | 7.703050000  |
| 1 | 12.026502000 | -6.342704000  | 8.775685000  |
| 6 | 11.636762000 | -6.179901000  | -4.886454000 |
| 6 | 10.560377000 | -6.403418000  | -5.754487000 |
| 6 | 12.930658000 | -6.073081000  | -5.413211000 |
| 1 | 9.555078000  | -6.477030000  | -5.349436000 |
| 1 | 13.769277000 | -5.915908000  | -4.741029000 |
| 6 | 10.774907000 | -6.510415000  | -7.124062000 |
| 6 | 13.142809000 | -6.198522000  | -6.781912000 |
| 1 | 9.933761000  | -6.671774000  | -7.790423000 |
| 1 | 14.150780000 | -6.133498000  | -7.178072000 |
| 6 | 12.065955000 | -6.413158000  | -7.639381000 |
| 1 | 12.233085000 | -6.507359000  | -8.707379000 |
| 6 | 11.076236000 | 7.008433000   | 4.915125000  |
| 6 | 12.364982000 | 7.129333000   | 5.447878000  |
| 6 | 9.974862000  | 7.017048000   | 5.779165000  |
| 1 | 13.220061000 | 7.138701000   | 4.777856000  |
| 1 | 8.973596000  | 6.918733000   | 5.368663000  |
| 6 | 12.547541000 | 7.261357000   | 6.821029000  |
| 6 | 10.161735000 | 7.137210000   | 7.152009000  |
| 1 | 13.549831000 | 7.369029000   | 7.222443000  |
| 1 | 9.302738000  | 7.133908000   | 7.815286000  |
| 6 | 11.447390000 | 7.262816000   | 7.674925000  |
| 1 | 11.591047000 | 7.365228000   | 8.745582000  |
| 6 | 11.033640000 | 6.937049000   | -4.928084000 |
| 6 | 12.318436000 | 7.050982000   | -5.471991000 |
| 6 | 9.926321000  | 6.934494000   | -5.784597000 |
| 1 | 13.178242000 | 7.069124000   | -4.808274000 |
| 1 | 8.928015000  | 6.840993000   | -5.365875000 |

|   |              |              |              |
|---|--------------|--------------|--------------|
| 6 | 12.491199000 | 7.164801000  | -6.847989000 |
| 6 | 10.103122000 | 7.036621000  | -7.160173000 |
| 1 | 13.490592000 | 7.267000000  | -7.257961000 |
| 1 | 9.239453000  | 7.024414000  | -7.817254000 |
| 6 | 11.384989000 | 7.155198000  | -7.693955000 |
| 1 | 11.520947000 | 7.243433000  | -8.766874000 |
| 6 | -0.449165000 | 12.959861000 | 4.909941000  |
| 6 | 0.168524000  | 12.027415000 | 5.750878000  |
| 6 | -1.078501000 | 14.074098000 | 5.476413000  |
| 1 | 0.655525000  | 11.158935000 | 5.314956000  |
| 1 | -1.548070000 | 14.806896000 | 4.826157000  |
| 6 | 0.155187000  | 12.204686000 | 7.130667000  |
| 6 | -1.086175000 | 14.252899000 | 6.856508000  |
| 1 | 0.633348000  | 11.472542000 | 7.773709000  |
| 1 | -1.567458000 | 15.126959000 | 7.283084000  |
| 6 | -0.470816000 | 13.318524000 | 7.686001000  |
| 1 | -0.476247000 | 13.459733000 | 8.761917000  |
| 6 | -0.440622000 | 12.932609000 | -4.972336000 |
| 6 | -1.066080000 | 14.045849000 | -5.545037000 |
| 6 | 0.176006000  | 11.994852000 | -5.808100000 |
| 1 | -1.534919000 | 14.782748000 | -4.898924000 |
| 1 | 0.659741000  | 11.126879000 | -5.367455000 |
| 6 | -1.070948000 | 14.218374000 | -6.925947000 |
| 6 | 0.165525000  | 12.165751000 | -7.188690000 |
| 1 | -1.549291000 | 15.091703000 | -7.357300000 |
| 1 | 0.642665000  | 11.429337000 | -7.827605000 |
| 6 | -0.456597000 | 13.278695000 | -7.750160000 |
| 1 | -0.459867000 | 13.415002000 | -8.826716000 |
| 6 | 1.227447000  | -0.651506000 | 0.009054000  |
| 6 | 0.034735000  | -1.401527000 | 0.012971000  |
| 6 | 1.175241000  | 0.756499000  | 0.005450000  |
| 6 | -1.212813000 | -0.744692000 | 0.014345000  |
| 6 | -0.071651000 | 1.414978000  | 0.006743000  |
| 6 | -1.266229000 | 0.664635000  | 0.012153000  |
| 6 | 0.096929000  | -2.898647000 | 0.012862000  |
| 6 | -0.415560000 | -3.639482000 | 1.082282000  |
| 6 | 0.668146000  | -3.589541000 | -1.060641000 |
| 1 | -0.861404000 | -3.120779000 | 1.926644000  |
| 1 | 1.068520000  | -3.031722000 | -1.902806000 |
| 6 | -0.357830000 | -5.028351000 | 1.079507000  |
| 6 | 0.720936000  | -4.978260000 | -1.067786000 |
| 1 | -0.735274000 | -5.579422000 | 1.936020000  |
| 1 | 1.139449000  | -5.491300000 | -1.928836000 |
| 6 | 0.209412000  | -5.721009000 | 0.003111000  |
| 6 | 2.552189000  | -1.354072000 | 0.006273000  |
| 6 | 2.939207000  | -2.160316000 | 1.081559000  |
| 6 | 3.432118000  | -1.221850000 | -1.072726000 |
| 1 | 2.271158000  | -2.275299000 | 1.930693000  |
| 1 | 3.149851000  | -0.602182000 | -1.919463000 |
| 6 | 4.168118000  | -2.809891000 | 1.080888000  |
| 6 | 4.657324000  | -1.878500000 | -1.079478000 |
| 1 | 4.455491000  | -3.401485000 | 1.945193000  |
| 1 | 5.304157000  | -1.784956000 | -1.946946000 |
| 6 | 5.048069000  | -2.682350000 | -0.001215000 |
| 6 | 2.447007000  | 1.550516000  | 0.000828000  |
| 6 | 3.354833000  | 1.454855000  | 1.060840000  |
| 6 | 2.755759000  | 2.407689000  | -1.060481000 |
| 1 | 3.132428000  | 0.798252000  | 1.897437000  |
| 1 | 2.064808000  | 2.496088000  | -1.894280000 |

|   |              |               |              |
|---|--------------|---------------|--------------|
| 6 | 4.531598000  | 2.194549000   | 1.062186000  |
| 6 | 3.933526000  | 3.146153000   | -1.062303000 |
| 1 | 5.202808000  | 2.125715000   | 1.913446000  |
| 1 | 4.161705000  | 3.782829000   | -1.912298000 |
| 6 | 4.840893000  | 3.052773000   | -0.000005000 |
| 6 | -0.124894000 | 2.912728000   | 0.000581000  |
| 6 | 0.433310000  | 3.654277000   | 1.046974000  |
| 6 | -0.733492000 | 3.605155000   | -1.051269000 |
| 1 | 0.923243000  | 3.136875000   | 1.867169000  |
| 1 | -1.185298000 | 3.047975000   | -1.867330000 |
| 6 | 0.380843000  | 5.043156000   | 1.044536000  |
| 6 | -0.779727000 | 4.994369000   | -1.058993000 |
| 1 | 0.841070000  | 5.594773000   | 1.859150000  |
| 1 | -1.277599000 | 5.506291000   | -1.877383000 |
| 6 | -0.225099000 | 5.737010000   | -0.009752000 |
| 6 | -2.591660000 | 1.366714000   | 0.012982000  |
| 6 | -3.502478000 | 1.183048000   | -1.032930000 |
| 6 | -2.949347000 | 2.226174000   | 1.057424000  |
| 1 | -3.251667000 | 0.509508000   | -1.847674000 |
| 1 | -2.251107000 | 2.396336000   | 1.872134000  |
| 6 | -4.727129000 | 1.840886000   | -1.038207000 |
| 6 | -4.177673000 | 2.877049000   | 1.059023000  |
| 1 | -5.422494000 | 1.663291000   | -1.853555000 |
| 1 | -4.418299000 | 3.556079000   | 1.871948000  |
| 6 | -5.086835000 | 2.697598000   | 0.009249000  |
| 6 | -2.478570000 | -1.548778000  | 0.015344000  |
| 6 | -3.399383000 | -1.443300000  | 1.063033000  |
| 6 | -2.768862000 | -2.427519000  | -1.034122000 |
| 1 | -3.201246000 | -0.756912000  | 1.881571000  |
| 1 | -2.061227000 | -2.536525000  | -1.851128000 |
| 6 | -4.569344000 | -2.194263000  | 1.063989000  |
| 6 | -3.942255000 | -3.172373000  | -1.039438000 |
| 1 | -5.276380000 | -2.075658000  | 1.880006000  |
| 1 | -4.129859000 | -3.862643000  | -1.856847000 |
| 6 | -4.862163000 | -3.069822000  | 0.011231000  |
| 6 | 6.097874000  | 3.842963000   | 0.001916000  |
| 6 | 6.155037000  | 5.132456000   | -0.539733000 |
| 6 | 7.351049000  | 5.835865000   | -0.519798000 |
| 7 | 8.478540000  | 5.337215000   | 0.005926000  |
| 6 | 8.435582000  | 4.105545000   | 0.531446000  |
| 6 | 7.282566000  | 3.333876000   | 0.547320000  |
| 1 | 5.268993000  | 5.601324000   | -0.953907000 |
| 1 | 7.420528000  | 6.838340000   | -0.934466000 |
| 1 | 9.366313000  | 3.731822000   | 0.951072000  |
| 1 | 7.317428000  | 2.332923000   | 0.963710000  |
| 6 | 6.359502000  | -3.379273000  | -0.004293000 |
| 6 | 7.480961000  | -2.831979000  | -0.639781000 |
| 6 | 8.687744000  | -3.515965000  | -0.621810000 |
| 7 | 8.846382000  | -4.696121000  | -0.006243000 |
| 6 | 7.781626000  | -5.229704000  | 0.609273000  |
| 6 | 6.537466000  | -4.615524000  | 0.628825000  |
| 1 | 7.427049000  | -1.866338000  | -1.130483000 |
| 1 | 9.568386000  | -3.109440000  | -1.113289000 |
| 1 | 7.940654000  | -6.187282000  | 1.099334000  |
| 1 | 5.708873000  | -5.114642000  | 1.119201000  |
| 6 | 0.265669000  | -7.204520000  | -0.004085000 |
| 6 | 1.337461000  | -7.893666000  | -0.582964000 |
| 6 | 1.348505000  | -9.281294000  | -0.572082000 |
| 7 | 0.370311000  | -10.010353000 | -0.019937000 |

|   |              |              |              |
|---|--------------|--------------|--------------|
| 6 | -0.658589000 | -9.362757000 | 0.541556000  |
| 6 | -0.750690000 | -7.978095000 | 0.567177000  |
| 1 | 2.172280000  | -7.357236000 | -1.021023000 |
| 1 | 2.167427000  | -9.842377000 | -1.015413000 |
| 1 | -1.433118000 | -9.985753000 | 0.981983000  |
| 1 | -1.623479000 | -7.510786000 | 1.010258000  |
| 6 | -6.116406000 | -3.864709000 | 0.007711000  |
| 6 | -6.793168000 | -4.158980000 | -1.182707000 |
| 6 | -7.966196000 | -4.898650000 | -1.141911000 |
| 7 | -8.496551000 | -5.351127000 | 0.001312000  |
| 6 | -7.857965000 | -5.082009000 | 1.147162000  |
| 6 | -6.678675000 | -4.352581000 | 1.194162000  |
| 1 | -6.425840000 | -3.794374000 | -2.135818000 |
| 1 | -8.516801000 | -5.138125000 | -2.048860000 |
| 1 | -8.316460000 | -5.477195000 | 2.051003000  |
| 1 | -6.191642000 | -4.187621000 | 2.149116000  |
| 6 | -6.398077000 | 3.394723000  | 0.007412000  |
| 6 | -6.992797000 | 3.834597000  | -1.182030000 |
| 6 | -8.223781000 | 4.473208000  | -1.140543000 |
| 7 | -8.884069000 | 4.697536000  | 0.002953000  |
| 6 | -8.323920000 | 4.289757000  | 1.149138000  |
| 6 | -7.098616000 | 3.640778000  | 1.195091000  |
| 1 | -6.491848000 | 3.704456000  | -2.135126000 |
| 1 | -8.707916000 | 4.829718000  | -2.047004000 |
| 1 | -8.893432000 | 4.489821000  | 2.053902000  |
| 1 | -6.707298000 | 3.308000000  | 2.150292000  |
| 6 | -0.275779000 | 7.221134000  | -0.014806000 |
| 6 | -0.182299000 | 7.951259000  | -1.205626000 |
| 6 | -0.230946000 | 9.337669000  | -1.165231000 |
| 7 | -0.361198000 | 10.021526000 | -0.022867000 |
| 6 | -0.452436000 | 9.337530000  | 1.123265000  |
| 6 | -0.416729000 | 7.950977000  | 1.171538000  |
| 1 | -0.047619000 | 7.448754000  | -2.157397000 |
| 1 | -0.155800000 | 9.936297000  | -2.070540000 |
| 1 | -0.564027000 | 9.935430000  | 2.025361000  |
| 1 | -0.522316000 | 7.446554000  | 2.125934000  |

**c-P6-T6<sup>6</sup>** optimized with **B3LYP** - E=-23385.062850au

|   |               |              |              |
|---|---------------|--------------|--------------|
| 6 | -12.945985000 | 0.078911000  | 1.271219000  |
| 6 | -13.338329000 | 0.708155000  | 2.504837000  |
| 6 | -13.320550000 | -0.271083000 | 3.453826000  |
| 6 | -12.865446000 | -1.479318000 | 2.802744000  |
| 7 | -12.662757000 | -1.230363000 | 1.453905000  |
| 1 | -13.646035000 | 1.738628000  | 2.613959000  |
| 1 | -13.614824000 | -0.189864000 | 4.489240000  |
| 6 | -12.668562000 | -2.717020000 | 3.438196000  |
| 6 | -12.228254000 | -3.898595000 | 2.780686000  |
| 6 | -11.864543000 | -5.124069000 | 3.452257000  |
| 7 | -12.033919000 | -4.028575000 | 1.428173000  |
| 6 | -11.444800000 | -5.992769000 | 2.485886000  |
| 1 | -11.918004000 | -5.296171000 | 4.516675000  |
| 6 | -11.569803000 | -5.296218000 | 1.233826000  |
| 1 | -11.110296000 | -7.013351000 | 2.606894000  |
| 6 | -11.278942000 | -5.861918000 | -0.039535000 |
| 6 | -11.573101000 | -5.282013000 | -1.304929000 |
| 6 | -11.444662000 | -5.963526000 | -2.565407000 |
| 7 | -12.039134000 | -4.012618000 | -1.484544000 |



|    |               |               |              |
|----|---------------|---------------|--------------|
| 6  | -11.862279000 | -5.083502000  | -3.521636000 |
| 1  | -11.107441000 | -6.981745000  | -2.698132000 |
| 6  | -12.227500000 | -3.866056000  | -2.835519000 |
| 1  | -11.911452000 | -5.241852000  | -4.588368000 |
| 6  | -12.659839000 | -2.675317000  | -3.481583000 |
| 6  | -12.850829000 | -1.443032000  | -2.833282000 |
| 6  | -13.306914000 | -0.227690000  | -3.469628000 |
| 7  | -12.647698000 | -1.209545000  | -1.481273000 |
| 6  | -13.328615000 | 0.739664000   | -2.508247000 |
| 1  | -13.600972000 | -0.134373000  | -4.504092000 |
| 6  | -12.936826000 | 0.096262000   | -1.282176000 |
| 1  | -13.639772000 | 1.770350000   | -2.604810000 |
| 6  | -12.928055000 | 0.745033000   | -0.000763000 |
| 30 | -11.940671000 | -2.524507000  | -0.019363000 |
| 6  | -12.888241000 | 2.122341000   | 0.007741000  |
| 6  | -12.655042000 | 3.339849000   | 0.012958000  |
| 6  | -10.612541000 | -7.093877000  | -0.046474000 |
| 6  | -9.889779000  | -8.086522000  | -0.048829000 |
| 6  | -3.892620000  | -12.423151000 | -3.445969000 |
| 6  | -2.675485000  | -12.695785000 | -2.797669000 |
| 6  | -5.042179000  | -11.883074000 | -2.806859000 |
| 6  | -1.508484000  | -13.271170000 | -3.426535000 |
| 7  | -2.415556000  | -12.475887000 | -1.453271000 |
| 6  | -6.223665000  | -11.425707000 | -3.501757000 |
| 7  | -5.172294000  | -11.661862000 | -1.460068000 |
| 6  | -0.538473000  | -13.349847000 | -2.469937000 |
| 1  | -1.448498000  | -13.601525000 | -4.452474000 |
| 6  | -1.137395000  | -12.873768000 | -1.252216000 |
| 30 | -3.670715000  | -11.638548000 | -0.003142000 |
| 6  | -7.062945000  | -10.914003000 | -2.555279000 |
| 1  | -6.384755000  | -11.479151000 | -4.567834000 |
| 6  | -6.395951000  | -11.082209000 | -1.291518000 |
| 1  | 0.460786000   | -13.751551000 | -2.562986000 |
| 6  | -0.484063000  | -12.886407000 | 0.027111000  |
| 7  | -5.181084000  | -11.609332000 | 1.440751000  |
| 7  | -2.436379000  | -12.459639000 | 1.472493000  |
| 1  | -8.047503000  | -10.490521000 | -2.695005000 |
| 6  | -6.948863000  | -10.721809000 | -0.032347000 |
| 6  | -1.148154000  | -12.831898000 | 1.298061000  |
| 6  | 0.893037000   | -12.949606000 | 0.032510000  |
| 6  | -6.412870000  | -11.056216000 | 1.244303000  |
| 6  | -5.066619000  | -11.809915000 | 2.793918000  |
| 6  | -2.699670000  | -12.622123000 | 2.823063000  |
| 6  | -8.103428000  | -9.929192000  | -0.045118000 |
| 6  | -0.547870000  | -13.244437000 | 2.539726000  |
| 6  | 2.124807000   | -12.814517000 | 0.035569000  |
| 6  | -7.098684000  | -10.876427000 | 2.495010000  |
| 6  | -6.263146000  | -11.357824000 | 3.462813000  |
| 6  | -3.920793000  | -12.330288000 | 3.454658000  |
| 6  | -1.525882000  | -13.147575000 | 3.484856000  |
| 6  | -9.000767000  | -9.090865000  | -0.048229000 |
| 1  | 0.459271000   | -13.619321000 | 2.656386000  |
| 1  | -8.092727000  | -10.469057000 | 2.614100000  |
| 1  | -6.440183000  | -11.397560000 | 4.526996000  |
| 1  | -1.466417000  | -13.430012000 | 4.524990000  |
| 6  | 12.036226000  | -4.534304000  | -0.017404000 |
| 6  | 12.438948000  | -3.255067000  | -0.018434000 |
| 6  | 11.551485000  | -5.662885000  | -0.018076000 |
| 6  | 12.688199000  | -2.052536000  | -0.021329000 |

|    |              |               |              |
|----|--------------|---------------|--------------|
| 6  | 10.805449000 | -6.847425000  | -0.016049000 |
| 6  | 12.772824000 | -0.654509000  | -0.020819000 |
| 6  | 10.403551000 | -7.364109000  | -1.277535000 |
| 6  | 10.492686000 | -7.409244000  | 1.255860000  |
| 6  | 12.784515000 | -0.007447000  | -1.287300000 |
| 6  | 12.799386000 | -0.011608000  | 1.248961000  |
| 6  | 10.894861000 | -6.901969000  | -2.547252000 |
| 7  | 9.536919000  | -8.408475000  | -1.443228000 |
| 6  | 11.189165000 | -7.098376000  | 2.475669000  |
| 7  | 9.528897000  | -8.345686000  | 1.468410000  |
| 7  | 12.661468000 | 1.338957000   | -1.468679000 |
| 6  | 12.958481000 | -0.681693000  | -2.546454000 |
| 7  | 12.660335000 | 1.333568000   | 1.434561000  |
| 6  | 12.998151000 | -0.683754000  | 2.504413000  |
| 6  | 10.331591000 | -7.710471000  | -3.493461000 |
| 1  | 11.599515000 | -6.095417000  | -2.692870000 |
| 6  | 9.486828000  | -8.647595000  | -2.792610000 |
| 30 | 8.186814000  | -9.039473000  | 0.019789000  |
| 6  | 10.644589000 | -7.896381000  | 3.439589000  |
| 1  | 12.018996000 | -6.411772000  | 2.567537000  |
| 6  | 9.581892000  | -8.645846000  | 2.809085000  |
| 6  | 12.765613000 | 1.548268000   | -2.820210000 |
| 30 | 11.916689000 | 2.646468000   | -0.012533000 |
| 6  | 12.958028000 | 0.290217000   | -3.504166000 |
| 1  | 13.091457000 | -1.746395000  | -2.676356000 |
| 6  | 12.789484000 | 1.544955000   | 2.784538000  |
| 6  | 13.002451000 | 0.288964000   | 3.463360000  |
| 1  | 13.145195000 | -1.746923000  | 2.632100000  |
| 1  | 10.475495000 | -7.673981000  | -4.562756000 |
| 6  | 8.695631000  | -9.648207000  | -3.426275000 |
| 7  | 7.416188000  | -10.347810000 | -1.424488000 |
| 7  | 7.447020000  | -10.327309000 | 1.488497000  |
| 1  | 10.949067000 | -7.984053000  | 4.471386000  |
| 6  | 8.718461000  | -9.550478000  | 3.476083000  |
| 6  | 12.643476000 | 2.805574000   | -3.471400000 |
| 7  | 11.999241000 | 4.137586000   | -1.479898000 |
| 7  | 12.043743000 | 4.141806000   | 1.445788000  |
| 1  | 13.068878000 | 0.166359000   | -4.570792000 |
| 6  | 12.682010000 | 2.804688000   | 3.434652000  |
| 1  | 13.134042000 | 0.165304000   | 4.527667000  |
| 6  | 7.742608000  | -10.440598000 | -2.768775000 |
| 6  | 6.432978000  | -11.250141000 | -1.218504000 |
| 6  | 7.691074000  | -10.284410000 | 2.848914000  |
| 6  | 6.366839000  | -11.132826000 | 1.328092000  |
| 6  | 12.286652000 | 4.004338000   | -2.829909000 |
| 6  | 11.715422000 | 5.447318000   | -1.288264000 |
| 6  | 11.738536000 | 5.446137000   | 1.262690000  |
| 6  | 12.331265000 | 4.004994000   | 2.794827000  |
| 6  | 6.944664000  | -11.475914000 | -3.389367000 |
| 6  | 6.104742000  | -11.957119000 | -2.429323000 |
| 6  | 5.819076000  | -11.503032000 | 0.056423000  |
| 6  | 6.706546000  | -11.080203000 | 3.544231000  |
| 6  | 5.873907000  | -11.600379000 | 2.595640000  |
| 6  | 12.190199000 | 5.294554000   | -3.473499000 |
| 6  | 11.801471000 | 6.187945000   | -2.518112000 |
| 6  | 11.436325000 | 6.038428000   | -0.009192000 |
| 6  | 11.823136000 | 6.184399000   | 2.495708000  |
| 6  | 12.226225000 | 5.292852000   | 3.444958000  |
| 1  | 7.033993000  | -11.806970000 | -4.412948000 |

|    |              |               |              |
|----|--------------|---------------|--------------|
| 1  | 5.376875000  | -12.751776000 | -2.514755000 |
| 6  | 4.592295000  | -12.132654000 | 0.049524000  |
| 1  | 6.656861000  | -11.220133000 | 4.613613000  |
| 1  | 5.030673000  | -12.261590000 | 2.737426000  |
| 1  | 12.421325000 | 5.497229000   | -4.508289000 |
| 1  | 11.652622000 | 7.253663000   | -2.620950000 |
| 6  | 10.819253000 | 7.270731000   | -0.005310000 |
| 1  | 11.659913000 | 7.247496000   | 2.603579000  |
| 1  | 12.456373000 | 5.492591000   | 4.480486000  |
| 6  | 3.418256000  | -12.528471000 | 0.041540000  |
| 6  | 10.097791000 | 8.278628000   | -0.005529000 |
| 6  | 9.209666000  | 9.260691000   | -0.005860000 |
| 6  | 8.279068000  | 10.079526000  | -0.006531000 |
| 6  | 7.111469000  | 10.811329000  | -0.007261000 |
| 6  | 6.554721000  | 11.163766000  | 1.268702000  |
| 6  | 6.547478000  | 11.148546000  | -1.284440000 |
| 6  | 7.305614000  | 11.190972000  | 2.496260000  |
| 7  | 5.281051000  | 11.574288000  | 1.460574000  |
| 7  | 5.272220000  | 11.556155000  | -1.474215000 |
| 6  | 7.293131000  | 11.169204000  | -2.514795000 |
| 6  | 6.456451000  | 11.667908000  | 3.450956000  |
| 1  | 8.352582000  | 10.941864000  | 2.597669000  |
| 6  | 5.177229000  | 11.876432000  | 2.809814000  |
| 30 | 3.790235000  | 11.598084000  | -0.002416000 |
| 6  | 5.164260000  | 11.855562000  | -2.824033000 |
| 6  | 6.440317000  | 11.642063000  | -3.468866000 |
| 1  | 8.340095000  | 10.921028000  | -2.618736000 |
| 1  | 6.682486000  | 11.884453000  | 4.484050000  |
| 6  | 4.010871000  | 12.322915000  | 3.454019000  |
| 7  | 2.542952000  | 12.424708000  | 1.454786000  |
| 7  | 2.540901000  | 12.429602000  | -1.457096000 |
| 6  | 3.998049000  | 12.311621000  | -3.463020000 |
| 1  | 6.663076000  | 11.854890000  | -4.503461000 |
| 6  | 2.761486000  | 12.527450000  | 2.805640000  |
| 6  | 1.209785000  | 12.645854000  | 1.270092000  |
| 6  | 1.208416000  | 12.651062000  | -1.268703000 |
| 6  | 2.754215000  | 12.528000000  | -2.808755000 |
| 6  | 1.520906000  | 12.815080000  | 3.486480000  |
| 6  | 0.551039000  | 12.878596000  | 2.527215000  |
| 6  | 0.566110000  | 12.673229000  | 0.001048000  |
| 6  | 0.545700000  | 12.884531000  | -2.524015000 |
| 6  | 1.512009000  | 12.818520000  | -3.486073000 |
| 1  | 1.405227000  | 12.945135000  | 4.551928000  |
| 1  | -0.501074000 | 13.089768000  | 2.656062000  |
| 6  | -0.834294000 | 12.692340000  | 0.002448000  |
| 1  | -0.506682000 | 13.096369000  | -2.649457000 |
| 1  | 1.392993000  | 12.946746000  | -4.551364000 |
| 6  | -2.052856000 | 12.541558000  | 0.005186000  |
| 6  | -3.363333000 | 12.255909000  | 0.008175000  |
| 6  | -4.534049000 | 11.885749000  | 0.011157000  |
| 6  | -5.799996000 | 11.286582000  | 0.012954000  |
| 6  | -6.373823000 | 10.998032000  | 1.282703000  |
| 6  | -6.375488000 | 10.996249000  | -1.256019000 |
| 6  | -5.865825000 | 11.482667000  | 2.538350000  |
| 7  | -7.495161000 | 10.244664000  | 1.471072000  |
| 7  | -7.497231000 | 10.242706000  | -1.440613000 |
| 6  | -5.873369000 | 11.482396000  | -2.512965000 |
| 6  | -6.717368000 | 11.021327000  | 3.500446000  |
| 1  | -4.995196000 | 12.110622000  | 2.663998000  |

|    |               |              |              |
|----|---------------|--------------|--------------|
| 6  | -7.728934000  | 10.244297000 | 2.822758000  |
| 30 | -8.288706000  | 8.971490000  | 0.015764000  |
| 6  | -7.739875000  | 10.247283000 | -2.791283000 |
| 6  | -6.730496000  | 11.023750000 | -3.472082000 |
| 1  | -5.003402000  | 12.110641000 | -2.641813000 |
| 1  | -6.661052000  | 11.185543000 | 4.565952000  |
| 6  | -8.772411000  | 9.533133000  | 3.476970000  |
| 7  | -9.620654000  | 8.319604000  | 1.487635000  |
| 7  | -9.637422000  | 8.334519000  | -1.446974000 |
| 6  | -8.793006000  | 9.544571000  | -3.439554000 |
| 1  | -6.679892000  | 11.191168000 | -4.537392000 |
| 6  | -9.646122000  | 8.636674000  | 2.837682000  |
| 6  | -10.613968000 | 7.422163000  | 1.297767000  |
| 6  | -10.626636000 | 7.433335000  | -1.255388000 |
| 6  | -9.668894000  | 8.654009000  | -2.795906000 |
| 6  | -10.720555000 | 7.915435000  | 3.482185000  |
| 6  | -11.301948000 | 7.132946000  | 2.527958000  |
| 6  | -10.988083000 | 6.881969000  | 0.020516000  |
| 6  | -11.321966000 | 7.148197000  | -2.482871000 |
| 6  | -10.747157000 | 7.934931000  | -3.437148000 |
| 1  | -11.011370000 | 8.017009000  | 4.516787000  |
| 1  | -12.152730000 | 6.474221000  | 2.631670000  |
| 6  | -11.748745000 | 5.733205000  | 0.019505000  |
| 1  | -12.171902000 | 6.488053000  | -2.584326000 |
| 1  | -11.043221000 | 8.039487000  | -4.469953000 |
| 6  | -12.256548000 | 4.602294000  | 0.017150000  |
| 6  | -8.937461000  | 9.756049000  | 4.936827000  |
| 6  | -8.844113000  | 8.689786000  | 5.848576000  |
| 6  | -9.197590000  | 11.049906000 | 5.424154000  |
| 1  | -8.628114000  | 7.690721000  | 5.480537000  |
| 1  | -9.285007000  | 11.876590000 | 4.725467000  |
| 6  | -9.005285000  | 8.913531000  | 7.214482000  |
| 6  | -9.376743000  | 11.265893000 | 6.788913000  |
| 1  | -8.919248000  | 8.084772000  | 7.911069000  |
| 1  | -9.599195000  | 12.265108000 | 7.150706000  |
| 6  | -9.277608000  | 10.199999000 | 7.687158000  |
| 1  | -9.413606000  | 10.371488000 | 8.750675000  |
| 6  | -8.964683000  | 9.770303000  | -4.898417000 |
| 6  | -9.221983000  | 11.065842000 | -5.382599000 |
| 6  | -8.879771000  | 8.704911000  | -5.811932000 |
| 1  | -9.302784000  | 11.891900000 | -4.682357000 |
| 1  | -8.666245000  | 7.704502000  | -5.446133000 |
| 6  | -9.406753000  | 11.284467000 | -6.746217000 |
| 6  | -9.046593000  | 8.931289000  | -7.176780000 |
| 1  | -9.627015000  | 12.285055000 | -7.105555000 |
| 1  | -8.967304000  | 8.103141000  | -7.874902000 |
| 6  | -9.316067000  | 10.219457000 | -7.646389000 |
| 1  | -9.456501000  | 10.392970000 | -8.709003000 |
| 6  | -12.930655000 | -2.807621000 | 4.898485000  |
| 6  | -12.231517000 | -1.999014000 | 5.811674000  |
| 6  | -13.895463000 | -3.708813000 | 5.384118000  |
| 1  | -11.475048000 | -1.311137000 | 5.444441000  |
| 1  | -14.449814000 | -4.326884000 | 4.684165000  |
| 6  | -12.490360000 | -2.091920000 | 7.177825000  |
| 6  | -14.164206000 | -3.785077000 | 6.749199000  |
| 1  | -11.936294000 | -1.470948000 | 7.875612000  |
| 1  | -14.926793000 | -4.468585000 | 7.109897000  |
| 6  | -13.460524000 | -2.980262000 | 7.649110000  |
| 1  | -13.668991000 | -3.044258000 | 8.712794000  |

|   |               |               |              |
|---|---------------|---------------|--------------|
| 6 | -12.920832000 | -2.748863000  | -4.942747000 |
| 6 | -12.220445000 | -1.930512000  | -5.846365000 |
| 6 | -13.886349000 | -3.643430000  | -5.439345000 |
| 1 | -11.463006000 | -1.248078000  | -5.471067000 |
| 1 | -14.441701000 | -4.268942000  | -4.746858000 |
| 6 | -12.478514000 | -2.007491000  | -7.213584000 |
| 6 | -14.154447000 | -3.703686000  | -6.805300000 |
| 1 | -11.923113000 | -1.379464000  | -7.903941000 |
| 1 | -14.917473000 | -4.382267000  | -7.174257000 |
| 6 | -13.449388000 | -2.889343000  | -7.695537000 |
| 1 | -13.657158000 | -2.941072000  | -8.760020000 |
| 6 | -4.031664000  | -12.574458000 | 4.916825000  |
| 6 | -4.994782000  | -13.475071000 | 5.406808000  |
| 6 | -3.181936000  | -11.921413000 | 5.826742000  |
| 1 | -5.645839000  | -13.993560000 | 4.709238000  |
| 1 | -2.446896000  | -11.212915000 | 5.455536000  |
| 6 | -5.091797000  | -13.727597000 | 6.773703000  |
| 6 | -3.295384000  | -12.162870000 | 7.194544000  |
| 1 | -5.824218000  | -14.441433000 | 7.138169000  |
| 1 | -2.642252000  | -11.643969000 | 7.890009000  |
| 6 | -4.245591000  | -13.070111000 | 7.670558000  |
| 1 | -4.325814000  | -13.265434000 | 8.735645000  |
| 6 | -3.994842000  | -12.713116000 | -4.899283000 |
| 6 | -3.123438000  | -12.108016000 | -5.822347000 |
| 6 | -4.971572000  | -13.610314000 | -5.369232000 |
| 1 | -2.378998000  | -11.400797000 | -5.467972000 |
| 1 | -5.639404000  | -14.092317000 | -4.661497000 |
| 6 | -3.228953000  | -12.392497000 | -7.182280000 |
| 6 | -5.060427000  | -13.906746000 | -6.727619000 |
| 1 | -2.559755000  | -11.909489000 | -7.888196000 |
| 1 | -5.803427000  | -14.617828000 | -7.075633000 |
| 6 | -4.192635000  | -13.296417000 | -7.637266000 |
| 1 | -4.266918000  | -13.525410000 | -8.696054000 |
| 6 | 8.908503000   | -9.746710000  | 4.936754000  |
| 6 | 9.200695000   | -11.027524000 | 5.440326000  |
| 6 | 8.807714000   | -8.667637000  | 5.832751000  |
| 1 | 9.296724000   | -11.862447000 | 4.752696000  |
| 1 | 8.568391000   | -7.678677000  | 5.452396000  |
| 6 | 9.401227000   | -11.219116000 | 6.805991000  |
| 6 | 8.989701000   | -8.867729000  | 7.199460000  |
| 1 | 9.647713000   | -12.208144000 | 7.180000000  |
| 1 | 8.896226000   | -8.030178000  | 7.884485000  |
| 6 | 9.292645000   | -10.141611000 | 7.688565000  |
| 1 | 9.445925000   | -10.293466000 | 8.752729000  |
| 6 | 8.900296000   | -9.855428000  | -4.883077000 |
| 6 | 7.837112000   | -9.708938000  | -5.791747000 |
| 6 | 10.171137000  | -10.211796000 | -5.370739000 |
| 1 | 6.857724000   | -9.417327000  | -5.423436000 |
| 1 | 10.994154000  | -10.341196000 | -4.674203000 |
| 6 | 8.041966000   | -9.912341000  | -7.154980000 |
| 6 | 10.366516000  | -10.433270000 | -6.732267000 |
| 1 | 7.216991000   | -9.784334000  | -7.849592000 |
| 1 | 11.346174000  | -10.730465000 | -7.093880000 |
| 6 | 9.304324000   | -10.280665000 | -7.627558000 |
| 1 | 9.460085000   | -10.449567000 | -8.688789000 |
| 6 | 12.961794000  | 2.843010000   | 4.894315000  |
| 6 | 14.224721000  | 2.456168000   | 5.378025000  |
| 6 | 11.981555000  | 3.268626000   | 5.807701000  |
| 1 | 14.991703000  | 2.139498000   | 4.677466000  |

|   |              |              |              |
|---|--------------|--------------|--------------|
| 1 | 10.999607000 | 3.554153000  | 5.441210000  |
| 6 | 14.503187000 | 2.510611000  | 6.742238000  |
| 6 | 12.258591000 | 3.303529000  | 7.173061000  |
| 1 | 15.488685000 | 2.230542000  | 7.101679000  |
| 1 | 11.490411000 | 3.622355000  | 7.871459000  |
| 6 | 13.520632000 | 2.930580000  | 7.642774000  |
| 1 | 13.738696000 | 2.968332000  | 8.705799000  |
| 6 | 12.914397000 | 2.845593000  | -4.931918000 |
| 6 | 14.172304000 | 2.452210000  | -5.424048000 |
| 6 | 11.931846000 | 3.279578000  | -5.839221000 |
| 1 | 14.941201000 | 2.129073000  | -4.728626000 |
| 1 | 10.953242000 | 3.568860000  | -5.466840000 |
| 6 | 14.443607000 | 2.508855000  | -6.789489000 |
| 6 | 12.201305000 | 3.316248000  | -7.205890000 |
| 1 | 15.425376000 | 2.223856000  | -7.155165000 |
| 1 | 11.431065000 | 3.640761000  | -7.899366000 |
| 6 | 13.458609000 | 2.937129000  | -7.683490000 |
| 1 | 13.670951000 | 2.976211000  | -8.747621000 |
| 6 | 4.073227000  | 12.595762000 | 4.913528000  |
| 6 | 4.437352000  | 11.588330000 | 5.824225000  |
| 6 | 3.770513000  | 13.880118000 | 5.401318000  |
| 1 | 4.657604000  | 10.590419000 | 5.455615000  |
| 1 | 3.501835000  | 14.667448000 | 4.703338000  |
| 6 | 4.495336000  | 11.859581000 | 7.189833000  |
| 6 | 3.848132000  | 14.151745000 | 6.765704000  |
| 1 | 4.766301000  | 11.071027000 | 7.885704000  |
| 1 | 3.634058000  | 15.152645000 | 7.127903000  |
| 6 | 4.206904000  | 13.142330000 | 7.663023000  |
| 1 | 4.262863000  | 13.355458000 | 8.726236000  |
| 6 | 4.056322000  | 12.582765000 | -4.922900000 |
| 6 | 3.760004000  | 13.868734000 | -5.410422000 |
| 6 | 4.410565000  | 11.572637000 | -5.834516000 |
| 1 | 3.498957000  | 14.658116000 | -4.711889000 |
| 1 | 4.625696000  | 10.573459000 | -5.466240000 |
| 6 | 3.834065000  | 14.139053000 | -6.775262000 |
| 6 | 4.465015000  | 11.842588000 | -7.200483000 |
| 1 | 3.624856000  | 15.141057000 | -7.137239000 |
| 1 | 4.728057000  | 11.051891000 | -7.896968000 |
| 6 | 4.182926000  | 13.126879000 | -7.673359000 |
| 1 | 4.236026000  | 13.338984000 | -8.736920000 |
| 6 | 0.935266000  | -1.029284000 | 0.000365000  |
| 6 | -0.446566000 | -1.330285000 | 0.001559000  |
| 6 | 1.366649000  | 0.317407000  | -0.003335000 |
| 6 | -1.399166000 | -0.284231000 | 0.001193000  |
| 6 | 0.415164000  | 1.364960000  | -0.003853000 |
| 6 | -0.968128000 | 1.064244000  | -0.001279000 |
| 6 | -0.898689000 | -2.761907000 | 0.001667000  |
| 6 | -1.606145000 | -3.298920000 | 1.087386000  |
| 6 | -0.625637000 | -3.604909000 | -1.086053000 |
| 1 | -1.830126000 | -2.668127000 | 1.942359000  |
| 1 | -0.080670000 | -3.214054000 | -1.939940000 |
| 6 | -2.023184000 | -4.627936000 | 1.087509000  |
| 6 | -1.045712000 | -4.932731000 | -1.090710000 |
| 1 | -2.539727000 | -5.017813000 | 1.959759000  |
| 1 | -0.845841000 | -5.545333000 | -1.964985000 |
| 6 | -1.753332000 | -5.474049000 | -0.002813000 |
| 6 | 1.943451000  | -2.141811000 | 0.002832000  |
| 6 | 2.055328000  | -3.013475000 | 1.096307000  |
| 6 | 2.800479000  | -2.344576000 | -1.088996000 |

|   |              |              |              |
|---|--------------|--------------|--------------|
| 1 | 1.404638000  | -2.878041000 | 1.954939000  |
| 1 | 2.734346000  | -1.684684000 | -1.948751000 |
| 6 | 2.989049000  | -4.046977000 | 1.100200000  |
| 6 | 3.730654000  | -3.381260000 | -1.090492000 |
| 1 | 3.069280000  | -4.680189000 | 1.978933000  |
| 1 | 4.352926000  | -3.528111000 | -1.968402000 |
| 6 | 3.846713000  | -4.255156000 | 0.005335000  |
| 6 | 2.834808000  | 0.632359000  | -0.007595000 |
| 6 | 3.653046000  | 0.280481000  | 1.076478000  |
| 6 | 3.431741000  | 1.288950000  | -1.094182000 |
| 1 | 3.216855000  | -0.227985000 | 1.930943000  |
| 1 | 2.821677000  | 1.571558000  | -1.946813000 |
| 6 | 5.013944000  | 0.577222000  | 1.077500000  |
| 6 | 4.793346000  | 1.582742000  | -1.097804000 |
| 1 | 5.608218000  | 0.320028000  | 1.949453000  |
| 1 | 5.226161000  | 2.062899000  | -1.970592000 |
| 6 | 5.614663000  | 1.235199000  | -0.010473000 |
| 6 | 0.876016000  | 2.794018000  | -0.005708000 |
| 6 | 1.622035000  | 3.313702000  | 1.063165000  |
| 6 | 0.576207000  | 3.652254000  | -1.074540000 |
| 1 | 1.882246000  | 2.667564000  | 1.895860000  |
| 1 | -0.014214000 | 3.281298000  | -1.906726000 |
| 6 | 2.047978000  | 4.639714000  | 1.066657000  |
| 6 | 1.009506000  | 4.976182000  | -1.078322000 |
| 1 | 2.642287000  | 5.000247000  | 1.901232000  |
| 1 | 0.739807000  | 5.616996000  | -1.912835000 |
| 6 | 1.753149000  | 5.499657000  | -0.005972000 |
| 6 | -1.978768000 | 2.174868000  | -0.001308000 |
| 6 | -2.873205000 | 2.339466000  | -1.069863000 |
| 6 | -2.060902000 | 3.079842000  | 1.067931000  |
| 1 | -2.842653000 | 1.643602000  | -1.902679000 |
| 1 | -1.369306000 | 2.986530000  | 1.899654000  |
| 6 | -3.810693000 | 3.369611000  | -1.072006000 |
| 6 | -3.004660000 | 4.104383000  | 1.073366000  |
| 1 | -4.501437000 | 3.452312000  | -1.906134000 |
| 1 | -3.025091000 | 4.798358000  | 1.908680000  |
| 6 | -3.899435000 | 4.272729000  | 0.001963000  |
| 6 | -2.865715000 | -0.607233000 | 0.002981000  |
| 6 | -3.690924000 | -0.226977000 | 1.072226000  |
| 6 | -3.455335000 | -1.298549000 | -1.066446000 |
| 1 | -3.264486000 | 0.323281000  | 1.905360000  |
| 1 | -2.837387000 | -1.620201000 | -1.899075000 |
| 6 | -5.051109000 | -0.527603000 | 1.074355000  |
| 6 | -4.816998000 | -1.591712000 | -1.071536000 |
| 1 | -5.662833000 | -0.196849000 | 1.908716000  |
| 1 | -5.233626000 | -2.146511000 | -1.907230000 |
| 6 | -5.644928000 | -1.213589000 | 0.000176000  |
| 6 | 7.065762000  | 1.553954000  | -0.009972000 |
| 6 | 7.573486000  | 2.705772000  | -0.637265000 |
| 6 | 8.938437000  | 2.966643000  | -0.616750000 |
| 7 | 9.829618000  | 2.163601000  | -0.007540000 |
| 6 | 9.358195000  | 1.060157000  | 0.601041000  |
| 6 | 8.009908000  | 0.722697000  | 0.618906000  |
| 1 | 6.908753000  | 3.412871000  | -1.121774000 |
| 1 | 9.352285000  | 3.847722000  | -1.096844000 |
| 1 | 10.101509000 | 0.433384000  | 1.083072000  |
| 1 | 7.703737000  | -0.197662000 | 1.104565000  |
| 6 | 4.841420000  | -5.358560000 | 0.006074000  |
| 6 | 6.079161000  | -5.242657000 | -0.651437000 |

|   |              |               |              |
|---|--------------|---------------|--------------|
| 6 | 6.981764000  | -6.299089000  | -0.631130000 |
| 7 | 6.739424000  | -7.458846000  | 0.006581000  |
| 6 | 5.561009000  | -7.583122000  | 0.643754000  |
| 6 | 4.600690000  | -6.578390000  | 0.663719000  |
| 1 | 6.354233000  | -4.325660000  | -1.161336000 |
| 1 | 7.940534000  | -6.228254000  | -1.134500000 |
| 1 | 5.395260000  | -8.530090000  | 1.147910000  |
| 1 | 3.660609000  | -6.758802000  | 1.173942000  |
| 6 | -2.201054000 | -6.890363000  | -0.005962000 |
| 6 | -1.458320000 | -7.903695000  | -0.638117000 |
| 6 | -1.914792000 | -9.216293000  | -0.620878000 |
| 7 | -3.054508000 | -9.588241000  | -0.010338000 |
| 6 | -3.773901000 | -8.630153000  | 0.601769000  |
| 6 | -3.392171000 | -7.294015000  | 0.623005000  |
| 1 | -0.515287000 | -7.679594000  | -1.125133000 |
| 1 | -1.359770000 | -10.014100000 | -1.104288000 |
| 1 | -4.687812000 | -8.961456000  | 1.083832000  |
| 1 | -4.036313000 | -6.569873000  | 1.110082000  |
| 6 | -7.097646000 | -1.524859000  | -0.003984000 |
| 6 | -7.850899000 | -1.528746000  | -1.192179000 |
| 6 | -9.209010000 | -1.821335000  | -1.153043000 |
| 7 | -9.861079000 | -2.105836000  | -0.012299000 |
| 6 | -9.155625000 | -2.108218000  | 1.132188000  |
| 6 | -7.794799000 | -1.829466000  | 1.179425000  |
| 1 | -7.390403000 | -1.280241000  | -2.142347000 |
| 1 | -9.815860000 | -1.824442000  | -2.053540000 |
| 1 | -9.716984000 | -2.352470000  | 2.029099000  |
| 1 | -7.278506000 | -1.873387000  | 2.132458000  |
| 6 | -4.906770000 | 5.364676000   | 0.005159000  |
| 6 | -5.297764000 | 6.016221000   | -1.178737000 |
| 6 | -6.250075000 | 7.027488000   | -1.133287000 |
| 7 | -6.831589000 | 7.430418000   | 0.009961000  |
| 6 | -6.465067000 | 6.821776000   | 1.151297000  |
| 6 | -5.523175000 | 5.800631000   | 1.192164000  |
| 1 | -4.847012000 | 5.756209000   | -2.130527000 |
| 1 | -6.565474000 | 7.551506000   | -2.030573000 |
| 1 | -6.961633000 | 7.173411000   | 2.050701000  |
| 1 | -5.292009000 | 5.331521000   | 2.142521000  |
| 6 | 2.214712000  | 6.911702000   | -0.005734000 |
| 6 | 2.591471000  | 7.568969000   | -1.191145000 |
| 6 | 3.023454000  | 8.889184000   | -1.146304000 |
| 7 | 3.105952000  | 9.590845000   | -0.002515000 |
| 6 | 2.746834000  | 8.978500000   | 1.139189000  |
| 6 | 2.301511000  | 7.662639000   | 1.180735000  |
| 1 | 2.573703000  | 7.049920000   | -2.143518000 |
| 1 | 3.327003000  | 9.418958000   | -2.044290000 |
| 1 | 2.817525000  | 9.582973000   | 2.038532000  |
| 1 | 2.001640000  | 7.235355000   | 2.131604000  |

**c-P6-T6<sup>+6</sup>** optimized with **CAM-B3LYP** - E=-23378.097541au

|   |              |              |             |
|---|--------------|--------------|-------------|
| 6 | 13.010526000 | 0.264831000  | 1.400609000 |
| 6 | 13.461307000 | -0.237900000 | 2.667817000 |
| 6 | 13.377229000 | 0.802016000  | 3.533456000 |
| 6 | 12.832530000 | 1.919549000  | 2.798999000 |
| 7 | 12.636885000 | 1.538836000  | 1.470678000 |
| 1 | 13.844318000 | -1.231845000 | 2.848049000 |
| 1 | 13.680680000 | 0.825309000  | 4.568842000 |



|    |              |              |              |
|----|--------------|--------------|--------------|
| 6  | 12.560796000 | 3.167079000  | 3.322782000  |
| 6  | 12.034044000 | 4.266071000  | 2.567321000  |
| 6  | 11.590205000 | 5.501530000  | 3.141718000  |
| 7  | 11.844652000 | 4.268772000  | 1.225950000  |
| 6  | 11.119354000 | 6.260771000  | 2.112401000  |
| 1  | 11.630039000 | 5.758970000  | 4.188682000  |
| 6  | 11.296970000 | 5.484035000  | 0.925990000  |
| 1  | 10.717687000 | 7.262390000  | 2.154195000  |
| 6  | 10.996699000 | 5.924155000  | -0.378010000 |
| 6  | 11.308752000 | 5.272011000  | -1.583256000 |
| 6  | 11.135619000 | 5.834487000  | -2.886583000 |
| 7  | 11.870373000 | 4.028077000  | -1.668015000 |
| 6  | 11.624199000 | 4.917137000  | -3.767167000 |
| 1  | 10.723904000 | 6.809846000  | -3.100842000 |
| 6  | 12.073554000 | 3.801581000  | -2.986129000 |
| 1  | 11.672473000 | 4.993073000  | -4.842294000 |
| 6  | 12.623974000 | 2.597381000  | -3.539083000 |
| 6  | 12.893180000 | 1.457968000  | -2.809416000 |
| 6  | 13.473380000 | 0.243922000  | -3.334012000 |
| 7  | 12.662035000 | 1.296954000  | -1.441564000 |
| 6  | 13.544830000 | -0.637456000 | -2.306813000 |
| 1  | 13.808110000 | 0.102434000  | -4.350189000 |
| 6  | 13.048854000 | 0.058454000  | -1.152487000 |
| 1  | 13.945467000 | -1.640670000 | -2.309900000 |
| 6  | 13.014499000 | -0.513177000 | 0.179073000  |
| 30 | 11.852222000 | 2.669910000  | -0.095950000 |
| 6  | 12.978918000 | -1.854409000 | 0.281613000  |
| 6  | 12.769997000 | -3.084564000 | 0.355775000  |
| 6  | 10.282793000 | 7.143524000  | -0.479138000 |
| 6  | 9.548820000  | 8.106607000  | -0.531609000 |
| 6  | 3.328717000  | 12.411873000 | -3.690976000 |
| 6  | 2.185338000  | 12.716659000 | -2.980690000 |
| 6  | 4.508034000  | 11.830659000 | -3.116086000 |
| 6  | 1.002363000  | 13.338986000 | -3.525334000 |
| 7  | 1.993947000  | 12.494187000 | -1.615438000 |
| 6  | 5.609332000  | 11.320238000 | -3.881415000 |
| 7  | 4.717531000  | 11.647175000 | -1.793847000 |
| 6  | 0.107222000  | 13.447352000 | -2.512030000 |
| 1  | 0.889809000  | 13.677480000 | -4.543874000 |
| 6  | 0.766538000  | 12.932536000 | -1.346283000 |
| 30 | 3.336796000  | 11.675656000 | -0.237090000 |
| 6  | 6.497741000  | 10.807484000 | -2.986178000 |
| 1  | 5.693040000  | 11.344273000 | -4.956758000 |
| 6  | 5.935548000  | 11.032620000 | -1.690000000 |
| 1  | -0.879610000 | 13.886472000 | -2.531837000 |
| 6  | 0.179591000  | 12.929496000 | -0.020504000 |
| 7  | 4.929121000  | 11.670682000 | 1.089323000  |
| 7  | 2.218346000  | 12.552005000 | 1.289895000  |
| 1  | 7.455421000  | 10.348992000 | -3.184965000 |
| 6  | 6.566526000  | 10.721694000 | -0.475200000 |
| 6  | 0.949586000  | 12.939990000 | 1.205986000  |
| 6  | -1.163022000 | 12.921953000 | 0.070712000  |
| 6  | 6.133068000  | 11.084062000 | 0.816806000  |
| 6  | 4.923080000  | 11.907305000 | 2.423813000  |
| 6  | 2.595625000  | 12.772103000 | 2.614493000  |
| 6  | 7.737157000  | 9.927261000  | -0.542901000 |
| 6  | 0.448061000  | 13.428566000 | 2.459256000  |
| 6  | -2.397885000 | 12.746759000 | 0.146892000  |
| 6  | 6.896578000  | 10.925902000 | 2.013252000  |

|    |               |              |              |
|----|---------------|--------------|--------------|
| 6  | 6.143034000   | 11.453692000 | 3.020483000  |
| 6  | 3.833080000   | 12.484803000 | 3.154056000  |
| 6  | 1.484327000   | 13.352749000 | 3.330316000  |
| 6  | 8.631708000   | 9.109363000  | -0.554302000 |
| 1  | -0.540771000  | 13.830471000 | 2.625925000  |
| 1  | 7.887766000   | 10.501440000 | 2.075821000  |
| 1  | 6.396209000   | 11.524547000 | 4.066822000  |
| 1  | 1.508196000   | 13.681315000 | 4.357958000  |
| 6  | -12.003487000 | 4.246397000  | 0.327176000  |
| 6  | -12.384554000 | 2.942992000  | 0.271642000  |
| 6  | -11.545202000 | 5.368363000  | 0.357976000  |
| 6  | -12.602424000 | 1.752447000  | 0.203414000  |
| 6  | -10.809061000 | 6.578298000  | 0.362166000  |
| 6  | -12.652723000 | 0.339525000  | 0.112832000  |
| 6  | -10.474757000 | 7.113826000  | -0.894612000 |
| 6  | -10.457229000 | 7.101654000  | 1.620247000  |
| 6  | -12.635716000 | -0.208992000 | -1.182020000 |
| 6  | -12.672066000 | -0.370070000 | 1.327570000  |
| 6  | -10.992954000 | 6.655508000  | -2.145193000 |
| 7  | -9.659820000  | 8.198285000  | -1.081188000 |
| 6  | -11.056126000 | 6.712926000  | 2.858988000  |
| 7  | -9.544035000  | 8.096601000  | 1.816276000  |
| 7  | -12.518227000 | -1.543024000 | -1.457122000 |
| 6  | -12.789411000 | 0.542806000  | -2.388799000 |
| 7  | -12.544613000 | -1.728455000 | 1.430285000  |
| 6  | -12.873117000 | 0.214606000  | 2.615893000  |
| 6  | -10.502728000 | 7.501148000  | -3.095426000 |
| 1  | -11.668636000 | 5.823590000  | -2.279068000 |
| 6  | -9.678729000  | 8.452172000  | -2.410746000 |
| 30 | -8.293697000  | 8.851177000  | 0.336218000  |
| 6  | -10.510262000 | 7.515884000  | 3.813935000  |
| 1  | -11.828892000 | 5.967289000  | 2.976802000  |
| 6  | -9.549313000  | 8.347145000  | 3.148270000  |
| 6  | -12.609854000 | -1.652053000 | -2.802848000 |
| 30 | -11.792530000 | -2.930815000 | -0.086674000 |
| 6  | -12.784695000 | -0.362575000 | -3.405725000 |
| 1  | -12.914919000 | 1.613737000  | -2.450722000 |
| 6  | -12.687816000 | -2.015663000 | 2.745655000  |
| 6  | -12.894035000 | -0.818380000 | 3.505085000  |
| 1  | -13.013318000 | 1.267179000  | 2.814080000  |
| 1  | -10.689307000 | 7.480402000  | -4.157839000 |
| 6  | -8.960977000  | 9.511471000  | -3.061690000 |
| 7  | -7.635720000  | 10.216459000 | -1.106863000 |
| 7  | -7.545520000  | 10.142304000 | 1.792743000  |
| 1  | -10.752933000 | 7.549728000  | 4.864387000  |
| 6  | -8.713455000  | 9.305097000  | 3.803565000  |
| 6  | -12.502943000 | -2.875378000 | -3.541432000 |
| 7  | -11.863513000 | -4.323139000 | -1.646586000 |
| 7  | -11.947120000 | -4.520900000 | 1.259030000  |
| 1  | -12.886675000 | -0.170581000 | -4.462399000 |
| 6  | -12.614622000 | -3.329746000 | 3.315602000  |
| 1  | -13.037277000 | -0.767441000 | 4.573140000  |
| 6  | -8.034321000  | 10.319934000 | -2.440041000 |
| 6  | -6.707328000  | 11.150177000 | -0.933639000 |
| 6  | -7.775908000  | 10.096549000 | 3.166076000  |
| 6  | -6.556552000  | 11.019309000 | 1.619042000  |
| 6  | -12.162590000 | -4.094596000 | -2.990235000 |
| 6  | -11.612195000 | -5.627061000 | -1.549149000 |
| 6  | -11.672739000 | -5.796238000 | 1.004516000  |

|    |               |               |              |
|----|---------------|---------------|--------------|
| 6  | -12.277967000 | -4.467911000  | 2.614123000  |
| 6  | -7.314977000  | 11.406811000  | -3.064085000 |
| 6  | -6.467817000  | 11.906401000  | -2.132268000 |
| 6  | -6.032720000  | 11.399070000  | 0.324858000  |
| 6  | -6.854367000  | 10.985923000  | 3.829131000  |
| 6  | -6.087826000  | 11.554799000  | 2.864820000  |
| 6  | -12.093892000 | -5.344945000  | -3.707308000 |
| 6  | -11.724095000 | -6.295847000  | -2.813607000 |
| 6  | -11.312632000 | -6.303527000  | -0.303804000 |
| 6  | -11.815776000 | -6.625328000  | 2.168896000  |
| 6  | -12.220428000 | -5.801681000  | 3.165676000  |
| 1  | -7.463780000  | 11.752643000  | -4.075480000 |
| 1  | -5.785193000  | 12.738762000  | -2.222953000 |
| 6  | -4.834944000  | 12.012888000  | 0.279452000  |
| 1  | -6.804549000  | 11.148650000  | 4.894903000  |
| 1  | -5.302099000  | 12.287455000  | 2.977809000  |
| 1  | -12.332306000 | -5.477990000  | -4.751380000 |
| 1  | -11.598121000 | -7.356491000  | -2.975529000 |
| 6  | -10.660417000 | -7.479304000  | -0.365032000 |
| 1  | -11.680408000 | -7.696687000  | 2.196637000  |
| 1  | -12.482909000 | -6.068519000  | 4.177848000  |
| 6  | -3.660344000  | 12.433933000  | 0.218889000  |
| 6  | -9.915790000  | -8.482220000  | -0.404271000 |
| 6  | -9.033075000  | -9.439204000  | -0.425582000 |
| 6  | -8.091405000  | -10.261257000 | -0.427104000 |
| 6  | -6.961237000  | -10.990260000 | -0.399079000 |
| 6  | -6.459706000  | -11.409274000 | 0.894974000  |
| 6  | -6.318274000  | -11.303295000 | -1.659465000 |
| 6  | -7.286914000  | -11.577380000 | 2.056604000  |
| 7  | -5.190091000  | -11.720292000 | 1.133835000  |
| 7  | -5.028032000  | -11.601153000 | -1.780497000 |
| 6  | -7.011585000  | -11.379773000 | -2.913667000 |
| 6  | -6.468368000  | -12.038403000 | 3.034011000  |
| 1  | -8.355001000  | -11.419884000 | 2.094249000  |
| 6  | -5.138014000  | -12.102380000 | 2.475706000  |
| 30 | -3.626106000  | -11.592096000 | -0.236078000 |
| 6  | -4.829451000  | -11.890706000 | -3.131583000 |
| 6  | -6.089481000  | -11.774754000 | -3.826598000 |
| 1  | -8.069623000  | -11.214387000 | -3.056582000 |
| 1  | -6.738367000  | -12.334786000 | 4.035973000  |
| 6  | -3.999054000  | -12.478108000 | 3.157242000  |
| 7  | -2.418992000  | -12.373425000 | 1.256852000  |
| 7  | -2.265118000  | -12.292893000 | -1.638991000 |
| 6  | -3.624424000  | -12.245738000 | -3.704846000 |
| 1  | -6.248114000  | -11.997700000 | -4.870539000 |
| 6  | -2.689656000  | -12.539154000 | 2.572621000  |
| 6  | -1.061332000  | -12.475548000 | 1.135501000  |
| 6  | -0.928786000  | -12.410960000 | -1.378448000 |
| 6  | -2.390496000  | -12.370102000 | -2.984193000 |
| 6  | -1.480328000  | -12.740087000 | 3.315111000  |
| 6  | -0.458767000  | -12.688739000 | 2.413916000  |
| 6  | -0.367386000  | -12.435395000 | -0.087971000 |
| 6  | -0.190832000  | -12.551294000 | -2.594899000 |
| 6  | -1.107866000  | -12.537392000 | -3.602615000 |
| 1  | -1.414897000  | -12.898765000 | 4.380297000  |
| 1  | 0.598011000   | -12.814866000 | 2.598062000  |
| 6  | 1.046094000   | -12.391125000 | -0.011016000 |
| 1  | 0.879665000   | -12.673297000 | -2.670437000 |
| 1  | -0.927128000  | -12.628441000 | -4.662370000 |

|    |              |               |              |
|----|--------------|---------------|--------------|
| 6  | 2.241335000  | -12.203596000 | 0.059991000  |
| 6  | 3.560052000  | -11.883987000 | 0.135357000  |
| 6  | 4.708912000  | -11.503350000 | 0.198592000  |
| 6  | 5.988582000  | -10.898895000 | 0.255204000  |
| 6  | 6.486113000  | -10.594478000 | 1.535309000  |
| 6  | 6.616749000  | -10.646469000 | -0.979002000 |
| 6  | 5.897799000  | -11.024198000 | 2.765674000  |
| 7  | 7.628328000  | -9.881973000  | 1.772979000  |
| 7  | 7.779354000  | -9.943046000  | -1.124350000 |
| 6  | 6.165282000  | -11.135435000 | -2.243769000 |
| 6  | 6.716738000  | -10.576821000 | 3.758327000  |
| 1  | 4.997056000  | -11.612712000 | 2.860063000  |
| 6  | 7.783583000  | -9.865214000  | 3.116803000  |
| 30 | 8.519062000  | -8.672859000  | 0.337983000  |
| 6  | 8.084112000  | -9.994223000  | -2.442511000 |
| 6  | 7.090866000  | -10.736018000 | -3.161451000 |
| 1  | 5.278965000  | -11.730323000 | -2.408290000 |
| 1  | 6.603115000  | -10.715633000 | 4.822208000  |
| 6  | 8.837088000  | -9.187097000  | 3.815897000  |
| 7  | 9.791404000  | -8.024586000  | 1.859405000  |
| 7  | 9.961715000  | -8.110624000  | -1.055693000 |
| 6  | 9.217590000  | -9.358144000  | -3.050113000 |
| 1  | 7.094827000  | -10.928141000 | -4.223119000 |
| 6  | 9.753008000  | -8.345213000  | 3.217854000  |
| 6  | 10.813729000 | -7.187031000  | 1.713892000  |
| 6  | 10.959458000 | -7.259279000  | -0.841644000 |
| 6  | 10.071574000 | -8.496897000  | -2.392747000 |
| 6  | 10.835874000 | -7.667458000  | 3.891009000  |
| 6  | 11.479174000 | -6.922850000  | 2.958001000  |
| 6  | 11.238212000 | -6.642246000  | 0.440066000  |
| 6  | 11.760050000 | -7.056269000  | -2.016298000 |
| 6  | 11.224131000 | -7.850685000  | -2.975196000 |
| 1  | 11.084933000 | -7.775569000  | 4.935498000  |
| 1  | 12.354094000 | -6.301204000  | 3.081566000  |
| 6  | 11.929824000 | -5.488405000  | 0.441847000  |
| 1  | 12.643372000 | -6.437071000  | -2.074027000 |
| 1  | 11.586517000 | -8.009973000  | -3.979173000 |
| 6  | 12.409255000 | -4.334303000  | 0.411012000  |
| 6  | 8.923461000  | -9.407509000  | 5.280881000  |
| 6  | 8.824858000  | -8.337241000  | 6.175272000  |
| 6  | 9.113705000  | -10.700458000 | 5.781230000  |
| 1  | 8.662673000  | -7.334407000  | 5.792358000  |
| 1  | 9.198587000  | -11.535194000 | 5.092820000  |
| 6  | 8.916971000  | -8.555784000  | 7.543835000  |
| 6  | 9.222266000  | -10.912577000 | 7.148693000  |
| 1  | 8.831152000  | -7.720259000  | 8.230715000  |
| 1  | 9.390476000  | -11.915808000 | 7.525511000  |
| 6  | 9.121219000  | -9.841946000  | 8.032251000  |
| 1  | 9.202697000  | -10.011099000 | 9.100773000  |
| 6  | 9.462344000  | -9.647926000  | -4.485054000 |
| 6  | 9.696361000  | -10.963457000 | -4.900609000 |
| 6  | 9.469264000  | -8.620805000  | -5.433681000 |
| 1  | 9.699746000  | -11.764940000 | -4.168793000 |
| 1  | 9.273829000  | -7.600739000  | -5.117703000 |
| 6  | 9.951133000  | -11.240252000 | -6.236755000 |
| 6  | 9.707821000  | -8.904125000  | -6.772427000 |
| 1  | 10.151815000 | -12.260549000 | -6.545766000 |
| 1  | 9.703121000  | -8.101843000  | -7.502911000 |
| 6  | 9.954361000  | -10.212351000 | -7.175131000 |

|   |               |               |              |
|---|---------------|---------------|--------------|
| 1 | 10.149917000  | -10.432028000 | -8.219399000 |
| 6 | 12.813984000  | 3.402145000   | 4.766720000  |
| 6 | 12.161962000  | 2.641820000   | 5.742077000  |
| 6 | 13.721645000  | 4.390002000   | 5.164120000  |
| 1 | 11.447586000  | 1.882821000   | 5.438337000  |
| 1 | 14.237314000  | 4.978789000   | 4.412216000  |
| 6 | 12.414284000  | 2.864424000   | 7.089779000  |
| 6 | 13.983489000  | 4.598299000   | 6.511376000  |
| 1 | 11.897984000  | 2.274636000   | 7.840039000  |
| 1 | 14.704147000  | 5.352651000   | 6.808682000  |
| 6 | 13.328621000  | 3.838594000   | 7.476282000  |
| 1 | 13.532703000  | 4.005722000   | 8.528621000  |
| 6 | 12.906489000  | 2.592962000   | -4.996199000 |
| 6 | 12.289065000  | 1.667897000   | -5.843511000 |
| 6 | 13.806526000  | 3.518719000   | -5.535593000 |
| 1 | 11.579726000  | 0.956820000   | -5.431365000 |
| 1 | 14.295529000  | 4.234868000   | -4.882963000 |
| 6 | 12.567540000  | 1.668040000   | -7.204317000 |
| 6 | 14.094990000  | 3.504801000   | -6.893308000 |
| 1 | 12.077117000  | 0.952089000   | -7.855614000 |
| 1 | 14.809364000  | 4.213475000   | -7.298528000 |
| 6 | 13.474154000  | 2.582233000   | -7.730320000 |
| 1 | 13.698293000  | 2.576375000   | -8.791787000 |
| 6 | 4.066413000   | 12.775883000  | 4.591114000  |
| 6 | 5.070204000   | 13.675640000  | 4.966006000  |
| 6 | 3.289709000   | 12.167125000  | 5.581405000  |
| 1 | 5.672062000   | 14.157390000  | 4.202013000  |
| 1 | 2.519596000   | 11.457646000  | 5.295026000  |
| 6 | 5.278181000   | 13.972983000  | 6.305925000  |
| 6 | 3.512222000   | 12.454670000  | 6.922073000  |
| 1 | 6.045271000   | 14.687305000  | 6.585409000  |
| 1 | 2.910122000   | 11.971441000  | 7.684485000  |
| 6 | 4.502176000   | 13.361293000  | 7.286066000  |
| 1 | 4.669211000   | 13.592729000  | 8.332751000  |
| 6 | 3.356914000   | 12.687954000  | -5.148035000 |
| 6 | 2.419199000   | 12.106421000  | -6.007265000 |
| 6 | 4.328087000   | 13.546080000  | -5.676612000 |
| 1 | 1.675379000   | 11.426393000  | -5.604012000 |
| 1 | 5.054846000   | 14.006667000  | -5.015119000 |
| 6 | 2.451345000   | 12.379707000  | -7.368601000 |
| 6 | 4.345627000   | 13.830668000  | -7.034943000 |
| 1 | 1.726066000   | 11.916281000  | -8.029239000 |
| 1 | 5.089408000   | 14.513304000  | -7.431839000 |
| 6 | 3.409956000   | 13.246034000  | -7.883504000 |
| 1 | 3.429019000   | 13.466394000  | -8.945613000 |
| 6 | -8.877069000  | 9.466236000   | 5.271367000  |
| 6 | -9.296152000  | 10.693462000  | 5.794396000  |
| 6 | -8.621292000  | 8.402726000   | 6.142532000  |
| 1 | -9.510151000  | 11.517116000  | 5.120883000  |
| 1 | -8.290876000  | 7.449284000   | 5.741943000  |
| 6 | -9.464066000  | 10.850351000  | 7.164562000  |
| 6 | -8.774590000  | 8.568591000   | 7.512270000  |
| 1 | -9.805275000  | 11.801552000  | 7.558986000  |
| 1 | -8.563343000  | 7.741897000   | 8.182570000  |
| 6 | -9.200609000  | 9.790453000   | 8.025257000  |
| 1 | -9.330203000  | 9.915092000   | 9.095143000  |
| 6 | -9.244936000  | 9.730426000   | -4.502122000 |
| 6 | -8.228289000  | 9.627456000   | -5.456405000 |
| 6 | -10.541835000 | 10.052875000  | -4.917133000 |

|   |               |               |              |
|---|---------------|---------------|--------------|
| 1 | -7.224135000  | 9.363086000   | -5.139871000 |
| 1 | -11.334459000 | 10.142286000  | -4.181097000 |
| 6 | -8.503783000  | 9.844377000   | -6.800513000 |
| 6 | -10.809456000 | 10.285535000  | -6.259153000 |
| 1 | -7.710494000  | 9.753923000   | -7.535231000 |
| 1 | -11.813684000 | 10.555089000  | -6.568422000 |
| 6 | -9.792328000  | 10.178770000  | -7.203232000 |
| 1 | -10.005080000 | 10.357255000  | -8.251993000 |
| 6 | -12.921713000 | -3.453271000  | 4.763320000  |
| 6 | -14.185277000 | -3.091723000  | 5.243013000  |
| 6 | -11.963077000 | -3.936018000  | 5.658945000  |
| 1 | -14.936977000 | -2.723634000  | 4.551997000  |
| 1 | -10.977457000 | -4.205035000  | 5.291950000  |
| 6 | -14.486773000 | -3.227759000  | 6.591227000  |
| 6 | -12.263391000 | -4.055104000  | 7.010021000  |
| 1 | -15.475589000 | -2.963238000  | 6.950475000  |
| 1 | -11.510533000 | -4.422534000  | 7.699600000  |
| 6 | -13.526052000 | -3.706324000  | 7.477287000  |
| 1 | -13.763039000 | -3.807743000  | 8.531117000  |
| 6 | -12.777313000 | -2.808610000  | -4.998560000 |
| 6 | -14.030004000 | -2.382812000  | -5.454101000 |
| 6 | -11.800641000 | -3.175456000  | -5.929383000 |
| 1 | -14.795539000 | -2.103922000  | -4.737099000 |
| 1 | -10.822869000 | -3.492312000  | -5.580122000 |
| 6 | -14.303388000 | -2.343392000  | -6.814442000 |
| 6 | -12.072413000 | -3.118132000  | -7.290325000 |
| 1 | -15.284234000 | -2.031331000  | -7.156973000 |
| 1 | -11.305561000 | -3.396065000  | -8.005862000 |
| 6 | -13.324850000 | -2.707675000  | -7.734698000 |
| 1 | -13.539850000 | -2.672040000  | -8.797485000 |
| 6 | -4.110945000  | -12.831678000 | 4.594173000  |
| 6 | -4.600562000  | -11.909618000 | 5.524339000  |
| 6 | -3.728801000  | -14.105203000 | 5.030517000  |
| 1 | -4.883848000  | -10.915491000 | 5.192688000  |
| 1 | -3.354619000  | -14.828567000 | 4.313107000  |
| 6 | -4.707992000  | -12.255845000 | 6.865207000  |
| 6 | -3.853794000  | -14.453021000 | 6.368465000  |
| 1 | -5.081075000  | -11.531127000 | 7.581345000  |
| 1 | -3.574424000  | -15.449585000 | 6.693384000  |
| 6 | -4.340406000  | -13.528746000 | 7.288323000  |
| 1 | -4.433256000  | -13.801904000 | 8.334150000  |
| 6 | -3.580074000  | -12.505785000 | -5.165101000 |
| 6 | -3.164895000  | -13.755800000 | -5.637741000 |
| 6 | -3.955381000  | -11.519521000 | -6.082486000 |
| 1 | -2.879007000  | -14.528617000 | -4.931415000 |
| 1 | -4.263860000  | -10.543431000 | -5.720987000 |
| 6 | -3.145654000  | -14.017310000 | -7.000817000 |
| 6 | -3.918344000  | -11.779387000 | -7.446393000 |
| 1 | -2.842233000  | -14.996263000 | -7.356262000 |
| 1 | -4.203465000  | -11.005284000 | -8.151193000 |
| 6 | -3.519199000  | -13.029487000 | -7.907337000 |
| 1 | -3.499600000  | -13.235344000 | -8.972338000 |
| 6 | -0.950690000  | 1.000258000   | 0.005935000  |
| 6 | 0.417811000   | 1.329373000   | -0.003069000 |
| 6 | -1.351123000  | -0.348055000  | -0.004657000 |
| 6 | 1.388030000   | 0.309935000   | 0.000106000  |
| 6 | -0.381769000  | -1.370049000  | -0.007276000 |
| 6 | 0.987740000   | -1.041402000  | 0.003396000  |
| 6 | 0.832598000   | 2.770457000   | -0.024388000 |

|   |              |              |              |
|---|--------------|--------------|--------------|
| 6 | 1.490993000  | 3.353830000  | 1.059424000  |
| 6 | 0.562434000  | 3.572016000  | -1.135512000 |
| 1 | 1.714387000  | 2.752846000  | 1.935092000  |
| 1 | 0.052929000  | 3.142245000  | -1.991914000 |
| 6 | 1.860171000  | 4.692429000  | 1.036444000  |
| 6 | 0.937264000  | 4.908208000  | -1.164095000 |
| 1 | 2.341933000  | 5.120545000  | 1.909651000  |
| 1 | 0.738761000  | 5.491882000  | -2.057239000 |
| 6 | 1.591420000  | 5.496471000  | -0.076544000 |
| 6 | -1.977972000 | 2.092487000  | 0.038531000  |
| 6 | -2.109041000 | 2.911839000  | 1.161599000  |
| 6 | -2.825161000 | 2.327032000  | -1.045811000 |
| 1 | -1.463343000 | 2.749354000  | 2.018592000  |
| 1 | -2.745430000 | 1.703924000  | -1.930790000 |
| 6 | -3.052608000 | 3.929251000  | 1.200804000  |
| 6 | -3.764544000 | 3.349256000  | -1.012193000 |
| 1 | -3.146282000 | 4.525790000  | 2.102558000  |
| 1 | -4.383963000 | 3.523120000  | -1.886218000 |
| 6 | -3.897707000 | 4.170797000  | 0.112524000  |
| 6 | -2.810452000 | -0.695589000 | -0.016865000 |
| 6 | -3.627094000 | -0.417175000 | 1.080928000  |
| 6 | -3.392084000 | -1.314721000 | -1.124991000 |
| 1 | -3.200946000 | 0.065130000  | 1.954734000  |
| 1 | -2.779703000 | -1.541689000 | -1.991767000 |
| 6 | -4.974078000 | -0.754350000 | 1.076027000  |
| 6 | -4.740350000 | -1.646649000 | -1.135024000 |
| 1 | -5.570147000 | -0.553029000 | 1.960341000  |
| 1 | -5.164274000 | -2.100899000 | -2.024899000 |
| 6 | -5.558102000 | -1.376784000 | -0.032490000 |
| 6 | -0.814454000 | -2.806107000 | -0.025855000 |
| 6 | -1.547290000 | -3.351664000 | 1.030556000  |
| 6 | -0.507816000 | -3.636311000 | -1.106221000 |
| 1 | -1.811055000 | -2.725883000 | 1.876716000  |
| 1 | 0.075410000  | -3.243158000 | -1.932533000 |
| 6 | -1.961385000 | -4.676528000 | 1.007443000  |
| 6 | -0.927831000 | -4.959611000 | -1.135715000 |
| 1 | -2.549056000 | -5.059957000 | 1.835488000  |
| 1 | -0.656462000 | -5.580861000 | -1.983383000 |
| 6 | -1.663992000 | -5.505595000 | -0.079118000 |
| 6 | 2.022429000  | -2.127324000 | 0.027730000  |
| 6 | 2.926562000  | -2.289562000 | -1.024222000 |
| 6 | 2.121251000  | -2.998306000 | 1.115095000  |
| 1 | 2.881523000  | -1.617828000 | -1.875177000 |
| 1 | 1.419712000  | -2.906086000 | 1.937831000  |
| 6 | 3.897272000  | -3.281706000 | -0.988792000 |
| 6 | 3.096993000  | -3.985329000 | 1.157305000  |
| 1 | 4.598481000  | -3.363736000 | -1.813215000 |
| 1 | 3.134849000  | -4.654490000 | 2.011066000  |
| 6 | 4.005872000  | -4.145121000 | 0.106256000  |
| 6 | 2.846369000  | 0.662449000  | -0.000447000 |
| 6 | 3.670544000  | 0.323436000  | 1.074837000  |
| 6 | 3.424824000  | 1.329889000  | -1.082411000 |
| 1 | 3.250431000  | -0.208319000 | 1.922267000  |
| 1 | 2.804426000  | 1.621257000  | -1.923582000 |
| 6 | 5.023686000  | 0.634813000  | 1.067325000  |
| 6 | 4.779409000  | 1.635164000  | -1.096082000 |
| 1 | 5.638816000  | 0.334401000  | 1.909622000  |
| 1 | 5.191397000  | 2.169200000  | -1.946489000 |
| 6 | 5.606315000  | 1.291883000  | -0.021431000 |

|   |               |              |              |
|---|---------------|--------------|--------------|
| 6 | -6.998770000  | -1.740188000 | -0.037321000 |
| 6 | -7.473997000  | -2.869078000 | -0.714090000 |
| 6 | -8.825793000  | -3.169412000 | -0.697849000 |
| 7 | -9.730829000  | -2.428253000 | -0.045354000 |
| 6 | -9.288409000  | -1.348074000 | 0.612115000  |
| 6 | -7.955523000  | -0.973154000 | 0.635960000  |
| 1 | -6.793689000  | -3.529101000 | -1.239623000 |
| 1 | -9.215871000  | -4.035305000 | -1.222390000 |
| 1 | -10.042529000 | -0.767222000 | 1.131833000  |
| 1 | -7.672787000  | -0.070663000 | 1.165279000  |
| 6 | -4.905025000  | 5.261998000  | 0.152302000  |
| 6 | -6.130264000  | 5.158748000  | -0.514710000 |
| 6 | -7.043952000  | 6.197321000  | -0.453563000 |
| 7 | -6.821878000  | 7.324890000  | 0.235094000  |
| 6 | -5.653646000  | 7.436120000  | 0.880730000  |
| 6 | -4.683004000  | 6.448516000  | 0.860562000  |
| 1 | -6.389391000  | 4.263027000  | -1.067056000 |
| 1 | -7.997759000  | 6.134146000  | -0.965919000 |
| 1 | -5.503366000  | 8.359775000  | 1.430203000  |
| 1 | -3.749484000  | 6.617017000  | 1.384772000  |
| 6 | 1.989527000   | 6.927340000  | -0.105227000 |
| 6 | 1.238288000   | 7.890391000  | -0.788472000 |
| 6 | 1.650403000   | 9.212400000  | -0.798196000 |
| 7 | 2.751165000   | 9.638507000  | -0.164946000 |
| 6 | 3.475640000   | 8.727954000  | 0.499233000  |
| 6 | 3.138196000   | 7.385967000  | 0.547975000  |
| 1 | 0.322033000   | 7.620218000  | -1.300494000 |
| 1 | 1.087280000   | 9.974371000  | -1.327114000 |
| 1 | 4.361378000   | 9.101155000  | 1.001303000  |
| 1 | 3.787520000   | 6.699786000  | 1.079030000  |
| 6 | 7.057736000   | 1.608654000  | -0.038015000 |
| 6 | 7.805172000   | 1.569750000  | -1.220753000 |
| 6 | 9.157280000   | 1.867637000  | -1.193655000 |
| 7 | 9.805226000   | 2.195225000  | -0.069313000 |
| 6 | 9.103743000   | 2.238713000  | 1.069799000  |
| 6 | 7.748900000   | 1.958159000  | 1.127706000  |
| 1 | 7.343995000   | 1.287535000  | -2.160119000 |
| 1 | 9.760818000   | 1.844128000  | -2.095589000 |
| 1 | 9.662183000   | 2.521178000  | 1.956660000  |
| 1 | 7.232598000   | 2.035264000  | 2.077612000  |
| 6 | 5.057934000   | -5.192785000 | 0.154212000  |
| 6 | 5.478761000   | -5.867751000 | -0.997106000 |
| 6 | 6.468823000   | -6.832125000 | -0.909539000 |
| 7 | 7.058576000   | -7.163241000 | 0.245609000  |
| 6 | 6.662429000   | -6.530414000 | 1.356637000  |
| 6 | 5.681915000   | -5.552767000 | 1.354178000  |
| 1 | 5.022788000   | -5.663121000 | -1.958893000 |
| 1 | 6.805653000   | -7.378555000 | -1.784794000 |
| 1 | 7.163739000   | -6.827898000 | 2.272288000  |
| 1 | 5.423155000   | -5.059947000 | 2.284204000  |
| 6 | -2.121936000  | -6.918321000 | -0.110566000 |
| 6 | -2.507048000  | -7.540392000 | -1.303749000 |
| 6 | -2.934969000  | -8.857149000 | -1.289410000 |
| 7 | -3.005977000  | -9.584653000 | -0.168005000 |
| 6 | -2.637124000  | -9.004917000 | 0.980722000  |
| 6 | -2.194740000  | -7.694569000 | 1.051562000  |
| 1 | -2.495561000  | -6.997588000 | -2.241862000 |
| 1 | -3.241166000  | -9.363558000 | -2.199364000 |
| 1 | -2.693213000  | -9.631865000 | 1.864979000  |



1 -1.886751000 -7.291275000 2.009285000

**c-P6-T6<sup>+</sup>** optimized with **M06-2X** - E=-23379.069117au

|    |               |               |              |
|----|---------------|---------------|--------------|
| 6  | -13.048479000 | 0.306250000   | 1.308987000  |
| 6  | -13.507016000 | 0.907815000   | 2.534019000  |
| 6  | -13.476205000 | -0.078746000  | 3.466691000  |
| 6  | -12.953805000 | -1.260138000  | 2.813422000  |
| 7  | -12.720600000 | -0.972678000  | 1.471306000  |
| 1  | -13.862207000 | 1.923241000   | 2.639723000  |
| 1  | -13.807820000 | -0.029087000  | 4.493654000  |
| 6  | -12.741199000 | -2.488441000  | 3.420862000  |
| 6  | -12.253269000 | -3.660784000  | 2.745474000  |
| 6  | -11.856228000 | -4.873783000  | 3.408340000  |
| 7  | -12.061518000 | -3.763364000  | 1.409993000  |
| 6  | -11.411448000 | -5.718625000  | 2.433507000  |
| 1  | -11.905252000 | -5.055335000  | 4.471836000  |
| 6  | -11.558466000 | -5.013395000  | 1.194174000  |
| 1  | -11.046883000 | -6.730288000  | 2.541837000  |
| 6  | -11.272109000 | -5.549940000  | -0.081429000 |
| 6  | -11.556042000 | -4.968643000  | -1.336264000 |
| 6  | -11.401120000 | -5.627951000  | -2.600484000 |
| 7  | -12.060092000 | -3.711724000  | -1.508865000 |
| 6  | -11.840809000 | -4.748342000  | -3.545563000 |
| 1  | -11.033299000 | -6.634088000  | -2.743818000 |
| 6  | -12.242444000 | -3.560382000  | -2.839988000 |
| 1  | -11.882471000 | -4.889988000  | -4.615402000 |
| 6  | -12.726208000 | -2.363718000  | -3.475136000 |
| 6  | -12.940447000 | -1.158009000  | -2.824582000 |
| 6  | -13.466999000 | 0.044294000   | -3.435020000 |
| 7  | -12.709427000 | -0.918152000  | -1.472303000 |
| 6  | -13.504616000 | 0.995677000   | -2.466780000 |
| 1  | -13.797616000 | 0.129631000   | -4.459983000 |
| 6  | -13.044786000 | 0.352156000   | -1.263729000 |
| 1  | -13.865172000 | 2.012352000   | -2.535707000 |
| 6  | -13.006088000 | 1.001145000   | 0.034922000  |
| 30 | -11.975559000 | -2.243944000  | -0.021505000 |
| 6  | -12.922912000 | 2.350863000   | 0.056975000  |
| 6  | -12.666209000 | 3.576501000   | 0.071387000  |
| 6  | -10.600462000 | -6.801185000  | -0.101911000 |
| 6  | -9.899729000  | -7.795419000  | -0.112860000 |
| 6  | -4.022695000  | -12.378014000 | -3.478156000 |
| 6  | -2.836867000  | -12.700455000 | -2.834723000 |
| 6  | -5.154702000  | -11.757807000 | -2.843398000 |
| 6  | -1.711397000  | -13.376456000 | -3.442433000 |
| 7  | -2.553647000  | -12.461408000 | -1.492360000 |
| 6  | -6.292470000  | -11.232561000 | -3.552548000 |
| 7  | -5.278050000  | -11.543639000 | -1.515645000 |
| 6  | -0.756726000  | -13.498932000 | -2.483405000 |
| 1  | -1.678967000  | -13.743427000 | -4.457992000 |
| 6  | -1.327707000  | -12.940050000 | -1.287350000 |
| 30 | -3.789360000  | -11.573922000 | -0.041962000 |
| 6  | -7.109275000  | -10.677709000 | -2.612953000 |
| 1  | -6.441529000  | -11.272711000 | -4.621392000 |
| 6  | -6.467246000  | -10.892678000 | -1.347932000 |
| 1  | 0.209958000   | -13.977622000 | -2.552746000 |
| 6  | -0.666375000  | -12.948118000 | 0.005989000  |
| 7  | -5.308864000  | -11.502106000 | 1.389097000  |

|    |              |               |              |
|----|--------------|---------------|--------------|
| 7  | -2.599702000 | -12.463868000 | 1.441296000  |
| 1  | -8.066133000 | -10.196458000 | -2.758217000 |
| 6  | -7.007128000 | -10.530399000 | -0.096948000 |
| 6  | -1.356597000 | -12.909394000 | 1.282197000  |
| 6  | 0.685434000  | -13.002801000 | 0.019217000  |
| 6  | -6.503357000 | -10.875902000 | 1.179031000  |
| 6  | -5.216780000 | -11.697189000 | 2.725414000  |
| 6  | -2.903188000 | -12.650012000 | 2.786215000  |
| 6  | -8.150919000 | -9.689049000  | -0.115049000 |
| 6  | -0.797619000 | -13.408144000 | 2.511584000  |
| 6  | 1.931239000  | -12.880747000 | 0.029476000  |
| 6  | -7.179237000 | -10.647769000 | 2.421404000  |
| 6  | -6.377137000 | -11.174275000 | 3.393106000  |
| 6  | -4.098586000 | -12.301913000 | 3.397004000  |
| 6  | -1.775798000 | -13.275561000 | 3.444212000  |
| 6  | -9.017528000 | -8.835281000  | -0.117530000 |
| 1  | 0.179961000  | -13.856294000 | 2.620560000  |
| 1  | -8.147512000 | -10.180894000 | 2.534382000  |
| 1  | -6.555904000 | -11.199911000 | 4.457870000  |
| 1  | -1.755160000 | -13.598156000 | 4.474975000  |
| 6  | 11.867367000 | -4.714497000  | 0.044524000  |
| 6  | 12.298387000 | -3.420757000  | 0.036235000  |
| 6  | 11.367855000 | -5.823984000  | 0.047147000  |
| 6  | 12.564827000 | -2.233731000  | 0.024511000  |
| 6  | 10.590826000 | -7.012165000  | 0.045922000  |
| 6  | 12.678442000 | -0.818000000  | 0.013998000  |
| 6  | 10.187160000 | -7.500423000  | -1.214506000 |
| 6  | 10.272525000 | -7.559066000  | 1.310231000  |
| 6  | 12.709715000 | -0.196770000  | -1.252516000 |
| 6  | 12.701921000 | -0.180502000  | 1.274722000  |
| 6  | 10.661402000 | -7.013299000  | -2.476681000 |
| 7  | 9.336542000  | -8.556109000  | -1.396051000 |
| 6  | 10.953493000 | -7.240824000  | 2.531270000  |
| 7  | 9.318190000  | -8.507250000  | 1.521132000  |
| 7  | 12.646652000 | 1.152320000   | -1.452762000 |
| 6  | 12.859200000 | -0.887889000  | -2.500620000 |
| 7  | 12.626791000 | 1.171384000   | 1.454787000  |
| 6  | 12.844131000 | -0.850403000  | 2.533582000  |
| 6  | 10.102210000 | -7.815267000  | -3.428912000 |
| 1  | 11.353818000 | -6.194874000  | -2.614658000 |
| 6  | 9.283086000  | -8.768471000  | -2.730140000 |
| 30 | 7.979547000  | -9.187338000  | 0.062217000  |
| 6  | 10.408528000 | -8.044174000  | 3.488893000  |
| 1  | 11.774237000 | -6.544237000  | 2.629625000  |
| 6  | 9.367265000  | -8.799747000  | 2.843316000  |
| 6  | 12.763565000 | 1.336535000   | -2.786774000 |
| 30 | 11.925925000 | 2.489673000   | -0.008522000 |
| 6  | 12.904320000 | 0.074565000   | -3.464790000 |
| 1  | 12.947135000 | -1.958538000  | -2.619560000 |
| 6  | 12.742056000 | 1.378768000   | 2.786857000  |
| 6  | 12.879898000 | 0.128928000   | 3.483748000  |
| 1  | 12.937058000 | -1.918532000  | 2.670719000  |
| 1  | 10.234890000 | -7.765073000  | -4.499555000 |
| 6  | 8.504965000  | -9.793715000  | -3.376889000 |
| 7  | 7.218586000  | -10.501384000 | -1.395563000 |
| 7  | 7.236944000  | -10.491837000 | 1.523545000  |
| 1  | 10.701645000 | -8.130945000  | 4.524476000  |
| 6  | 8.503738000  | -9.730763000  | 3.507575000  |
| 6  | 12.708729000 | 2.608575000   | -3.453399000 |

|    |              |               |              |
|----|--------------|---------------|--------------|
| 7  | 12.069481000 | 3.971531000   | -1.493127000 |
| 7  | 12.107674000 | 4.001544000   | 1.439950000  |
| 1  | 13.013362000 | -0.058735000  | -4.530874000 |
| 6  | 12.702731000 | 2.664694000   | 3.429734000  |
| 1  | 12.986663000 | 0.012044000   | 4.552022000  |
| 6  | 7.572184000  | -10.592966000 | -2.738702000 |
| 6  | 6.272401000  | -11.414071000 | -1.203943000 |
| 6  | 7.502485000  | -10.469530000 | 2.886457000  |
| 6  | 6.199676000  | -11.316486000 | 1.364349000  |
| 6  | 12.393527000 | 3.811052000   | -2.837412000 |
| 6  | 11.868910000 | 5.277129000   | -1.319567000 |
| 6  | 11.886155000 | 5.299087000   | 1.251029000  |
| 6  | 12.416332000 | 3.859956000   | 2.789932000  |
| 6  | 6.807496000  | -11.655944000 | -3.358938000 |
| 6  | 5.975004000  | -12.149363000 | -2.407462000 |
| 6  | 5.631144000  | -11.660402000 | 0.076169000  |
| 6  | 6.552127000  | -11.317123000 | 3.569924000  |
| 6  | 5.732489000  | -11.839966000 | 2.619559000  |
| 6  | 12.396479000 | 5.106093000   | -3.481874000 |
| 6  | 12.040562000 | 6.018516000   | -2.540228000 |
| 6  | 11.572471000 | 5.890022000   | -0.037046000 |
| 6  | 12.044847000 | 6.059655000   | 2.463685000  |
| 6  | 12.405670000 | 5.164529000   | 3.418163000  |
| 1  | 6.923369000  | -11.994211000 | -4.378387000 |
| 1  | 5.270823000  | -12.965694000 | -2.486105000 |
| 6  | 4.406817000  | -12.238015000 | 0.059586000  |
| 1  | 6.518963000  | -11.481889000 | 4.637162000  |
| 1  | 4.913454000  | -12.533841000 | 2.745779000  |
| 1  | 12.676117000 | 5.290569000   | -4.508932000 |
| 1  | 11.965804000 | 7.092415000   | -2.637780000 |
| 6  | 10.965290000 | 7.098934000   | -0.045048000 |
| 1  | 11.953940000 | 7.133449000   | 2.547450000  |
| 1  | 12.673053000 | 5.363878000   | 4.445674000  |
| 6  | 3.214009000  | -12.616493000 | 0.043357000  |
| 6  | 10.256500000 | 8.131084000   | -0.052904000 |
| 6  | 9.402475000  | 9.123160000   | -0.058807000 |
| 6  | 8.485582000  | 9.976123000   | -0.062521000 |
| 6  | 7.371235000  | 10.742160000  | -0.061768000 |
| 6  | 6.825882000  | 11.137483000  | 1.225099000  |
| 6  | 6.804109000  | 11.110576000  | -1.347203000 |
| 6  | 7.607469000  | 11.241307000  | 2.429558000  |
| 7  | 5.559299000  | 11.494360000  | 1.417616000  |
| 7  | 5.533851000  | 11.463090000  | -1.526035000 |
| 6  | 7.566131000  | 11.194981000  | -2.565173000 |
| 6  | 6.761828000  | 11.714291000  | 3.381273000  |
| 1  | 8.666823000  | 11.041808000  | 2.509398000  |
| 6  | 5.460590000  | 11.846971000  | 2.761057000  |
| 30 | 4.053542000  | 11.485920000  | -0.041031000 |
| 6  | 5.414682000  | 11.797448000  | -2.872512000 |
| 6  | 6.705440000  | 11.653455000  | -3.510985000 |
| 1  | 8.624405000  | 10.995377000  | -2.658308000 |
| 1  | 6.997480000  | 11.983492000  | 4.400629000  |
| 6  | 4.303836000  | 12.272024000  | 3.396731000  |
| 7  | 2.811524000  | 12.308869000  | 1.421830000  |
| 7  | 2.790777000  | 12.296144000  | -1.495833000 |
| 6  | 4.249880000  | 12.224129000  | -3.493908000 |
| 1  | 6.925437000  | 11.907745000  | -4.537657000 |
| 6  | 3.026015000  | 12.422137000  | 2.752284000  |
| 6  | 1.469592000  | 12.476574000  | 1.237710000  |

|    |               |              |              |
|----|---------------|--------------|--------------|
| 6  | 1.452458000   | 12.470057000 | -1.293289000 |
| 6  | 2.984631000   | 12.392450000 | -2.830523000 |
| 6  | 1.788905000   | 12.662886000 | 3.445618000  |
| 6  | 0.811174000   | 12.685967000 | 2.493935000  |
| 6  | 0.833448000   | 12.492684000 | -0.023623000 |
| 6  | 0.775445000   | 12.670140000 | -2.541442000 |
| 6  | 1.737980000   | 12.632697000 | -3.507509000 |
| 1  | 1.679500000   | 12.791037000 | 4.512420000  |
| 1  | -0.247515000  | 12.857286000 | 2.627981000  |
| 6  | -0.586416000  | 12.505963000 | -0.012878000 |
| 1  | -0.284629000  | 12.843846000 | -2.660709000 |
| 1  | 1.612499000   | 12.749188000 | -4.573861000 |
| 6  | -1.794702000  | 12.366611000 | 0.000469000  |
| 6  | -3.131537000  | 12.098348000 | 0.015822000  |
| 6  | -4.299897000  | 11.760327000 | 0.029810000  |
| 6  | -5.604871000  | 11.200423000 | 0.042521000  |
| 6  | -6.163225000  | 10.937209000 | 1.312812000  |
| 6  | -6.188632000  | 10.942696000 | -1.218165000 |
| 6  | -5.610284000  | 11.377269000 | 2.560723000  |
| 7  | -7.330967000  | 10.260831000 | 1.517422000  |
| 7  | -7.362519000  | 10.271273000 | -1.401143000 |
| 6  | -5.663134000  | 11.390512000 | -2.474538000 |
| 6  | -6.479813000  | 10.967677000 | 3.528647000  |
| 1  | -4.698240000  | 11.945100000 | 2.678586000  |
| 6  | -7.540982000  | 10.269284000 | 2.852963000  |
| 30 | -8.190693000  | 9.031876000  | 0.061608000  |
| 6  | -7.605367000  | 10.293681000 | -2.731661000 |
| 6  | -6.557183000  | 10.992635000 | -3.425612000 |
| 1  | -4.752305000  | 11.956561000 | -2.609143000 |
| 1  | -6.404289000  | 11.118681000 | 4.595371000  |
| 6  | -8.641880000  | 9.625170000  | 3.518295000  |
| 7  | -9.548431000  | 8.442714000  | 1.548178000  |
| 7  | -9.589936000  | 8.466511000  | -1.394908000 |
| 6  | -8.727147000  | 9.663476000  | -3.375177000 |
| 1  | -6.506404000  | 11.153363000 | -4.492403000 |
| 6  | -9.558882000  | 8.790593000  | 2.896667000  |
| 6  | -10.590387000 | 7.635036000  | 1.370645000  |
| 6  | -10.624831000 | 7.653875000  | -1.201680000 |
| 6  | -9.633006000  | 8.828554000  | -2.738724000 |
| 6  | -10.695037000 | 8.163476000  | 3.537730000  |
| 6  | -11.321864000 | 7.417872000  | 2.591198000  |
| 6  | -10.979979000 | 7.082414000  | 0.085357000  |
| 6  | -11.386632000 | 7.450463000  | -2.406238000 |
| 6  | -10.784687000 | 8.208495000  | -3.358826000 |
| 1  | -10.989739000 | 8.309563000  | 4.566753000  |
| 1  | -12.224244000 | 6.830318000  | 2.685727000  |
| 6  | -11.725033000 | 5.953919000  | 0.086600000  |
| 1  | -12.290050000 | 6.862277000  | -2.485498000 |
| 1  | -11.104678000 | 8.366155000  | -4.378541000 |
| 6  | -12.253291000 | 4.818416000  | 0.081738000  |
| 6  | -8.784330000  | 9.874497000  | 4.973546000  |
| 6  | -8.795615000  | 8.812494000  | 5.887097000  |
| 6  | -8.919165000  | 11.187648000 | 5.446226000  |
| 1  | -8.672256000  | 7.795412000  | 5.525123000  |
| 1  | -8.923700000  | 12.014187000 | 4.741228000  |
| 6  | -8.940861000  | 9.059542000  | 7.247973000  |
| 6  | -9.082911000  | 11.428137000 | 6.805448000  |
| 1  | -8.938276000  | 8.232333000  | 7.950160000  |
| 1  | -9.210277000  | 12.445421000 | 7.160210000  |

|   |               |               |              |
|---|---------------|---------------|--------------|
| 6 | -9.090672000  | 10.365890000  | 7.708210000  |
| 1 | -9.214336000  | 10.557176000  | 8.769018000  |
| 6 | -8.904079000  | 9.928878000   | -4.823884000 |
| 6 | -9.043620000  | 11.247799000  | -5.278789000 |
| 6 | -8.942897000  | 8.877012000   | -5.748305000 |
| 1 | -9.026694000  | 12.066533000  | -4.564928000 |
| 1 | -8.815759000  | 7.855490000   | -5.400457000 |
| 6 | -9.239325000  | 11.504077000  | -6.630872000 |
| 6 | -9.120096000  | 9.139851000   | -7.102464000 |
| 1 | -9.370099000  | 12.525807000  | -6.971338000 |
| 1 | -9.138796000  | 8.320448000   | -7.813502000 |
| 6 | -9.274526000  | 10.451876000  | -7.544661000 |
| 1 | -9.423180000  | 10.655412000  | -8.599967000 |
| 6 | -13.025136000 | -2.619960000  | 4.871165000  |
| 6 | -12.395364000 | -1.788213000  | 5.805933000  |
| 6 | -13.943070000 | -3.581517000  | 5.316772000  |
| 1 | -11.670323000 | -1.054262000  | 5.464811000  |
| 1 | -14.443826000 | -4.220613000  | 4.594975000  |
| 6 | -12.679723000 | -1.915500000  | 7.161416000  |
| 6 | -14.237775000 | -3.692456000  | 6.670660000  |
| 1 | -12.180309000 | -1.274324000  | 7.880318000  |
| 1 | -14.966636000 | -4.423472000  | 7.004342000  |
| 6 | -13.604693000 | -2.862795000  | 7.594871000  |
| 1 | -13.833663000 | -2.954499000  | 8.651449000  |
| 6 | -13.003459000 | -2.441972000  | -4.930378000 |
| 6 | -12.370618000 | -1.574759000  | -5.830338000 |
| 6 | -13.917271000 | -3.387796000  | -5.416279000 |
| 1 | -11.648509000 | -0.853017000  | -5.458348000 |
| 1 | -14.420402000 | -4.054348000  | -4.721451000 |
| 6 | -12.647628000 | -1.651946000  | -7.191059000 |
| 6 | -14.204869000 | -3.448592000  | -6.774848000 |
| 1 | -12.145544000 | -0.983795000  | -7.883041000 |
| 1 | -14.930542000 | -4.167937000  | -7.139377000 |
| 6 | -13.568523000 | -2.584000000  | -7.664254000 |
| 1 | -13.791722000 | -2.636970000  | -8.724712000 |
| 6 | -4.250839000  | -12.557999000 | 4.850603000  |
| 6 | -5.296287000  | -13.372516000 | 5.308188000  |
| 6 | -3.357293000  | -12.003732000 | 5.776044000  |
| 1 | -5.984700000  | -13.814730000 | 4.593487000  |
| 1 | -2.558566000  | -11.356250000 | 5.424896000  |
| 6 | -5.429807000  | -13.642283000 | 6.665224000  |
| 6 | -3.506408000  | -12.261568000 | 7.134647000  |
| 1 | -6.227503000  | -14.292468000 | 7.008595000  |
| 1 | -2.816680000  | -11.820100000 | 7.846526000  |
| 6 | -4.537935000  | -13.085107000 | 7.580321000  |
| 1 | -4.647124000  | -13.294004000 | 8.639400000  |
| 6 | -4.150157000  | -12.683432000 | -4.923292000 |
| 6 | -3.228446000  | -12.178620000 | -5.849955000 |
| 6 | -5.201147000  | -13.495721000 | -5.373234000 |
| 1 | -2.426621000  | -11.530882000 | -5.506579000 |
| 1 | -5.911634000  | -13.899860000 | -4.657650000 |
| 6 | -3.355282000  | -12.482428000 | -7.201087000 |
| 6 | -5.312119000  | -13.812378000 | -6.721948000 |
| 1 | -2.644673000  | -12.077886000 | -7.914294000 |
| 1 | -6.114337000  | -14.460650000 | -7.058250000 |
| 6 | -4.392291000  | -13.303982000 | -7.637863000 |
| 1 | -4.484502000  | -13.548570000 | -8.690903000 |
| 6 | 8.706155000   | -9.928756000  | 4.964878000  |
| 6 | 9.022657000   | -11.201692000 | 5.457817000  |

|   |              |               |              |
|---|--------------|---------------|--------------|
| 6 | 8.591445000  | -8.855298000  | 5.858013000  |
| 1 | 9.133093000  | -12.031251000 | 4.765257000  |
| 1 | 8.336846000  | -7.868799000  | 5.480328000  |
| 6 | 9.229702000  | -11.393685000 | 6.819962000  |
| 6 | 8.780796000  | -9.056304000  | 7.220335000  |
| 1 | 9.494114000  | -12.378497000 | 7.190330000  |
| 1 | 8.677128000  | -8.223456000  | 7.908087000  |
| 6 | 9.105434000  | -10.323519000 | 7.702660000  |
| 1 | 9.265194000  | -10.475466000 | 8.765018000  |
| 6 | 8.730366000  | -9.988694000  | -4.830039000 |
| 6 | 7.670340000  | -9.889292000  | -5.740523000 |
| 6 | 10.015965000 | -10.287874000 | -5.303194000 |
| 1 | 6.677506000  | -9.637680000  | -5.377997000 |
| 1 | 10.839171000 | -10.379002000 | -4.600144000 |
| 6 | 7.892589000  | -10.087371000 | -7.099144000 |
| 6 | 10.229277000 | -10.503550000 | -6.659639000 |
| 1 | 7.068650000  | -9.998254000  | -7.799509000 |
| 1 | 11.222415000 | -10.758095000 | -7.014346000 |
| 6 | 9.169556000  | -10.400437000 | -7.559566000 |
| 1 | 9.339959000  | -10.565060000 | -8.618387000 |
| 6 | 12.991828000 | 2.694381000   | 4.885217000  |
| 6 | 14.218258000 | 2.211361000   | 5.362666000  |
| 6 | 12.057586000 | 3.210671000   | 5.792044000  |
| 1 | 14.951410000 | 1.821702000   | 4.662022000  |
| 1 | 11.099357000 | 3.568471000   | 5.425492000  |
| 6 | 14.509194000 | 2.263518000   | 6.720952000  |
| 6 | 12.346113000 | 3.243711000   | 7.152339000  |
| 1 | 15.469794000 | 1.908852000   | 7.079363000  |
| 1 | 11.613320000 | 3.635586000   | 7.850051000  |
| 6 | 13.573129000 | 2.776162000   | 7.617732000  |
| 1 | 13.801442000 | 2.811834000   | 8.677839000  |
| 6 | 13.014795000 | 2.618496000   | -4.904742000 |
| 6 | 14.248399000 | 2.132314000   | -5.360717000 |
| 6 | 12.090093000 | 3.118872000   | -5.830497000 |
| 1 | 14.974173000 | 1.754973000   | -4.645850000 |
| 1 | 11.125858000 | 3.477497000   | -5.481024000 |
| 6 | 14.555637000 | 2.166441000   | -6.715879000 |
| 6 | 12.394611000 | 3.133078000   | -7.187427000 |
| 1 | 15.521553000 | 1.809873000   | -7.057671000 |
| 1 | 11.668789000 | 3.511489000   | -7.899681000 |
| 6 | 13.628833000 | 2.663147000   | -7.631115000 |
| 1 | 13.869715000 | 2.684151000   | -8.688828000 |
| 6 | 4.364618000  | 12.588342000  | 4.844531000  |
| 6 | 4.807288000  | 11.635966000  | 5.771725000  |
| 6 | 3.982808000  | 13.859814000  | 5.295851000  |
| 1 | 5.084952000  | 10.643670000  | 5.426947000  |
| 1 | 3.650470000  | 14.606113000  | 4.579750000  |
| 6 | 4.868949000  | 11.950878000  | 7.124974000  |
| 6 | 4.064030000  | 14.175783000  | 6.646982000  |
| 1 | 5.202894000  | 11.204530000  | 7.838259000  |
| 1 | 3.789050000  | 15.169437000  | 6.984570000  |
| 6 | 4.503659000  | 13.221737000  | 7.563481000  |
| 1 | 4.561863000  | 13.469937000  | 8.618106000  |
| 6 | 4.289927000  | 12.523659000  | -4.945934000 |
| 6 | 3.909809000  | 13.792774000  | -5.405278000 |
| 6 | 4.711983000  | 11.558431000  | -5.869465000 |
| 1 | 3.593404000  | 14.548920000  | -4.692318000 |
| 1 | 4.988324000  | 10.568014000  | -5.518220000 |
| 6 | 3.972504000  | 14.093626000  | -6.760833000 |

|   |              |              |              |
|---|--------------|--------------|--------------|
| 6 | 4.755060000  | 11.858231000 | -7.226817000 |
| 1 | 3.699019000  | 15.085443000 | -7.104961000 |
| 1 | 5.072992000  | 11.102002000 | -7.937015000 |
| 6 | 4.391683000  | 13.126809000 | -7.673504000 |
| 1 | 4.435506000  | 13.363266000 | -8.731514000 |
| 6 | 0.915595000  | -1.040470000 | -0.012104000 |
| 6 | -0.466592000 | -1.318162000 | -0.009512000 |
| 6 | 1.367647000  | 0.294044000  | -0.019790000 |
| 6 | -1.399326000 | -0.260768000 | -0.008326000 |
| 6 | 0.436197000  | 1.353898000  | -0.020481000 |
| 6 | -0.947488000 | 1.076720000  | -0.014071000 |
| 6 | -0.936781000 | -2.742904000 | -0.009636000 |
| 6 | -1.651294000 | -3.267509000 | 1.072003000  |
| 6 | -0.664630000 | -3.584551000 | -1.093495000 |
| 1 | -1.872368000 | -2.632099000 | 1.925311000  |
| 1 | -0.114771000 | -3.196446000 | -1.946506000 |
| 6 | -2.073410000 | -4.592545000 | 1.073693000  |
| 6 | -1.095648000 | -4.906135000 | -1.098302000 |
| 1 | -2.594563000 | -4.980753000 | 1.943915000  |
| 1 | -0.900446000 | -5.523396000 | -1.970353000 |
| 6 | -1.805056000 | -5.435274000 | -0.012611000 |
| 6 | 1.902323000  | -2.170664000 | -0.003334000 |
| 6 | 1.988125000  | -3.036481000 | 1.091922000  |
| 6 | 2.753261000  | -2.393313000 | -1.090621000 |
| 1 | 1.339348000  | -2.879476000 | 1.949310000  |
| 1 | 2.702437000  | -1.734631000 | -1.953331000 |
| 6 | 2.896403000  | -4.089058000 | 1.101840000  |
| 6 | 3.653120000  | -3.453450000 | -1.087712000 |
| 1 | 2.963401000  | -4.721096000 | 1.982497000  |
| 1 | 4.272767000  | -3.622375000 | -1.963466000 |
| 6 | 3.742779000  | -4.319649000 | 0.009651000  |
| 6 | 2.839999000  | 0.584587000  | -0.025421000 |
| 6 | 3.648066000  | 0.214720000  | 1.055040000  |
| 6 | 3.440475000  | 1.239993000  | -1.105428000 |
| 1 | 3.202933000  | -0.292363000 | 1.906735000  |
| 1 | 2.833047000  | 1.533447000  | -1.957215000 |
| 6 | 5.008863000  | 0.500445000  | 1.061265000  |
| 6 | 4.803101000  | 1.517814000  | -1.105085000 |
| 1 | 5.601489000  | 0.234406000  | 1.931703000  |
| 1 | 5.245787000  | 1.998140000  | -1.972865000 |
| 6 | 5.611382000  | 1.157151000  | -0.019387000 |
| 6 | 0.923329000  | 2.773309000  | -0.024171000 |
| 6 | 1.705894000  | 3.263735000  | 1.027213000  |
| 6 | 0.613631000  | 3.641304000  | -1.076807000 |
| 1 | 1.968388000  | 2.605528000  | 1.850654000  |
| 1 | -0.004629000 | 3.287574000  | -1.897212000 |
| 6 | 2.161890000  | 4.576938000  | 1.027870000  |
| 6 | 1.077329000  | 4.952531000  | -1.082867000 |
| 1 | 2.785131000  | 4.921600000  | 1.847989000  |
| 1 | 0.804082000  | 5.608257000  | -1.904613000 |
| 6 | 1.858683000  | 5.443805000  | -0.029484000 |
| 6 | -1.940388000 | 2.202107000  | -0.010693000 |
| 6 | -2.857754000 | 2.354899000  | -1.056084000 |
| 6 | -1.980515000 | 3.122613000  | 1.042348000  |
| 1 | -2.853990000 | 1.645135000  | -1.878656000 |
| 1 | -1.268612000 | 3.032916000  | 1.858186000  |
| 6 | -3.783438000 | 3.392293000  | -1.049505000 |
| 6 | -2.913084000 | 4.154158000  | 1.056243000  |
| 1 | -4.497211000 | 3.471696000  | -1.864404000 |

|   |              |              |              |
|---|--------------|--------------|--------------|
| 1 | -2.908401000 | 4.863370000  | 1.879001000  |
| 6 | -3.830754000 | 4.307450000  | 0.009525000  |
| 6 | -2.870202000 | -0.559671000 | 0.000485000  |
| 6 | -3.684838000 | -0.133150000 | 1.055118000  |
| 6 | -3.466946000 | -1.265775000 | -1.049929000 |
| 1 | -3.246658000 | 0.427324000  | 1.876225000  |
| 1 | -2.853021000 | -1.619952000 | -1.873316000 |
| 6 | -5.049362000 | -0.400989000 | 1.058928000  |
| 6 | -4.833076000 | -1.525515000 | -1.052972000 |
| 1 | -5.659233000 | -0.036324000 | 1.880506000  |
| 1 | -5.263629000 | -2.090806000 | -1.874543000 |
| 6 | -5.648772000 | -1.097292000 | 0.001906000  |
| 6 | 7.065678000  | 1.463728000  | -0.012423000 |
| 6 | 7.582030000  | 2.601194000  | -0.646099000 |
| 6 | 8.947303000  | 2.848018000  | -0.619907000 |
| 7 | 9.822565000  | 2.044666000  | 0.001732000  |
| 6 | 9.340044000  | 0.956074000  | 0.618667000  |
| 6 | 7.990732000  | 0.631653000  | 0.630185000  |
| 1 | 6.925719000  | 3.308212000  | -1.141598000 |
| 1 | 9.368242000  | 3.722069000  | -1.110170000 |
| 1 | 10.070376000 | 0.324131000  | 1.117533000  |
| 1 | 7.671430000  | -0.280107000 | 1.123020000  |
| 6 | 4.709608000  | -5.448333000 | 0.015006000  |
| 6 | 5.927899000  | -5.375448000 | -0.671688000 |
| 6 | 6.803553000  | -6.451351000 | -0.646742000 |
| 7 | 6.548466000  | -7.583240000 | 0.025825000  |
| 6 | 5.387363000  | -7.664539000 | 0.691230000  |
| 6 | 4.452050000  | -6.639416000 | 0.706096000  |
| 1 | 6.211913000  | -4.477817000 | -1.209742000 |
| 1 | 7.750471000  | -6.411856000 | -1.179256000 |
| 1 | 5.207956000  | -8.592948000 | 1.228087000  |
| 1 | 3.519759000  | -6.782945000 | 1.241174000  |
| 6 | -2.261171000 | -6.849423000 | -0.015018000 |
| 6 | -1.539670000 | -7.855997000 | -0.669663000 |
| 6 | -2.005948000 | -9.162770000 | -0.654373000 |
| 7 | -3.130785000 | -9.528858000 | -0.023075000 |
| 6 | -3.826598000 | -8.575791000 | 0.614252000  |
| 6 | -3.435710000 | -7.244624000 | 0.636706000  |
| 1 | -0.606403000 | -7.633272000 | -1.175177000 |
| 1 | -1.464644000 | -9.957271000 | -1.161685000 |
| 1 | -4.732527000 | -8.899553000 | 1.120054000  |
| 1 | -4.062476000 | -6.519437000 | 1.143872000  |
| 6 | -7.110029000 | -1.368455000 | -0.002668000 |
| 6 | -7.849652000 | -1.380737000 | -1.192422000 |
| 6 | -9.214024000 | -1.631119000 | -1.153263000 |
| 7 | -9.876074000 | -1.862960000 | -0.011713000 |
| 6 | -9.180724000 | -1.859317000 | 1.133629000  |
| 6 | -7.814461000 | -1.620785000 | 1.181714000  |
| 1 | -7.374624000 | -1.172375000 | -2.144925000 |
| 1 | -9.812327000 | -1.642916000 | -2.061433000 |
| 1 | -9.750548000 | -2.064464000 | 2.037060000  |
| 1 | -7.302140000 | -1.655971000 | 2.137070000  |
| 6 | -4.831887000 | 5.405519000  | 0.021922000  |
| 6 | -5.245952000 | 6.033819000  | -1.159747000 |
| 6 | -6.193583000 | 7.046099000  | -1.106490000 |
| 7 | -6.743569000 | 7.464228000  | 0.041531000  |
| 6 | -6.349543000 | 6.879255000  | 1.180729000  |
| 6 | -5.410152000 | 5.858413000  | 1.214795000  |
| 1 | -4.817858000 | 5.756165000  | -2.116819000 |



|   |              |             |              |
|---|--------------|-------------|--------------|
| 1 | -6.527229000 | 7.555067000 | -2.007940000 |
| 1 | -6.816948000 | 7.247343000 | 2.091186000  |
| 1 | -5.152279000 | 5.404371000 | 2.165449000  |
| 6 | 2.357537000  | 6.843507000 | -0.032349000 |
| 6 | 2.715303000  | 7.493647000 | -1.220687000 |
| 6 | 3.186661000  | 8.798123000 | -1.177286000 |
| 7 | 3.324313000  | 9.481466000 | -0.033084000 |
| 6 | 2.979336000  | 8.874842000 | 1.110659000  |
| 6 | 2.496830000  | 7.574555000 | 1.154630000  |
| 1 | 2.651917000  | 6.982569000 | -2.175264000 |
| 1 | 3.474723000  | 9.325256000 | -2.084018000 |
| 1 | 3.090910000  | 9.466613000 | 2.016372000  |
| 1 | 2.209884000  | 7.146210000 | 2.108820000  |

**c-P6-T6<sup>+12</sup>** optimized with **B3LYP** - E=-23381.749050au

|    |               |              |              |
|----|---------------|--------------|--------------|
| 6  | -8.128274000  | 10.003033000 | 1.183839000  |
| 6  | -7.853692000  | 10.646294000 | 2.448408000  |
| 6  | -8.762085000  | 10.152549000 | 3.332177000  |
| 6  | -9.529041000  | 9.139091000  | 2.624774000  |
| 7  | -9.139489000  | 9.067753000  | 1.333129000  |
| 1  | -7.136501000  | 11.439215000 | 2.608308000  |
| 1  | -8.923583000  | 10.482271000 | 4.345944000  |
| 6  | -10.631709000 | 8.363693000  | 3.178998000  |
| 6  | -11.198589000 | 7.262585000  | 2.525028000  |
| 6  | -12.132963000 | 6.333302000  | 3.125869000  |
| 7  | -10.909827000 | 6.849851000  | 1.227804000  |
| 6  | -12.400963000 | 5.377191000  | 2.187929000  |
| 1  | -12.510030000 | 6.387851000  | 4.136711000  |
| 6  | -11.644732000 | 5.742970000  | 1.020350000  |
| 1  | -13.066035000 | 4.529356000  | 2.271954000  |
| 6  | -11.733669000 | 5.057940000  | -0.259547000 |
| 6  | -11.441998000 | 5.640212000  | -1.494344000 |
| 6  | -11.807358000 | 5.114039000  | -2.791781000 |
| 7  | -10.860616000 | 6.892952000  | -1.634263000 |
| 6  | -11.493464000 | 6.079978000  | -3.697146000 |
| 1  | -12.291265000 | 4.164377000  | -2.972053000 |
| 6  | -10.902396000 | 7.178046000  | -2.947092000 |
| 1  | -11.648097000 | 6.061850000  | -4.765829000 |
| 6  | -10.376437000 | 8.394686000  | -3.556695000 |
| 6  | -9.484361000  | 9.246541000  | -2.891915000 |
| 6  | -8.967252000  | 10.497514000 | -3.404026000 |
| 7  | -8.992646000  | 9.043117000  | -1.598054000 |
| 6  | -8.121771000  | 10.999259000 | -2.457010000 |
| 1  | -9.248857000  | 10.962931000 | -4.336458000 |
| 6  | -8.191115000  | 10.092612000 | -1.343946000 |
| 1  | -7.579616000  | 11.934291000 | -2.478937000 |
| 6  | -7.594692000  | 10.385717000 | -0.048908000 |
| 30 | -9.577173000  | 7.655185000  | -0.153802000 |
| 6  | -6.434832000  | 11.177379000 | -0.057771000 |
| 6  | -5.335201000  | 11.719534000 | -0.093095000 |
| 6  | -12.195761000 | 3.730668000  | -0.237638000 |
| 6  | -12.464903000 | 2.535601000  | -0.195236000 |
| 6  | -12.479950000 | -5.198293000 | -3.162194000 |
| 6  | -11.852609000 | -6.230674000 | -2.452123000 |
| 6  | -12.611622000 | -3.846686000 | -2.629087000 |
| 6  | -11.749255000 | -7.608672000 | -2.880523000 |
| 7  | -11.273559000 | -6.100928000 | -1.184594000 |

|    |               |               |              |
|----|---------------|---------------|--------------|
| 6  | -12.867534000 | -2.669274000  | -3.446974000 |
| 7  | -12.462798000 | -3.510268000  | -1.337757000 |
| 6  | -11.056263000 | -8.279423000  | -1.913707000 |
| 1  | -12.192085000 | -8.027300000  | -3.771645000 |
| 6  | -10.812132000 | -7.324953000  | -0.868511000 |
| 30 | -11.397795000 | -4.518152000  | 0.170630000  |
| 6  | -12.862805000 | -1.601646000  | -2.604687000 |
| 1  | -13.030919000 | -2.671057000  | -4.514532000 |
| 6  | -12.643614000 | -2.134158000  | -1.276628000 |
| 1  | -10.817198000 | -9.333072000  | -1.877194000 |
| 6  | -10.277781000 | -7.696009000  | 0.434283000  |
| 7  | -12.403182000 | -3.281905000  | 1.510249000  |
| 7  | -11.355756000 | -5.916524000  | 1.736826000  |
| 1  | -13.046602000 | -0.563522000  | -2.843539000 |
| 6  | -12.722987000 | -1.420054000  | -0.081176000 |
| 6  | -10.640243000 | -7.101077000  | 1.642676000  |
| 6  | -9.388627000  | -8.784024000  | 0.458396000  |
| 6  | -12.810699000 | -2.029718000  | 1.238032000  |
| 6  | -12.777632000 | -3.527430000  | 2.829050000  |
| 6  | -11.699818000 | -5.788663000  | 3.034769000  |
| 6  | -12.770205000 | -0.016572000  | -0.135582000 |
| 6  | -10.503022000 | -7.704968000  | 2.949281000  |
| 6  | -8.493228000  | -9.621241000  | 0.431400000  |
| 6  | -13.420494000 | -1.405199000  | 2.381025000  |
| 6  | -13.411986000 | -2.344538000  | 3.373029000  |
| 6  | -12.530770000 | -4.704076000  | 3.544852000  |
| 6  | -11.209809000 | -6.922157000  | 3.806743000  |
| 6  | -12.668810000 | 1.204796000   | -0.158807000 |
| 1  | -10.021196000 | -8.649921000  | 3.158084000  |
| 1  | -13.825683000 | -0.403707000  | 2.414370000  |
| 1  | -13.775718000 | -2.236850000  | 4.384521000  |
| 1  | -11.415275000 | -7.122693000  | 4.845942000  |
| 6  | 4.028761000   | -12.093858000 | -0.412086000 |
| 6  | 5.280833000   | -11.598073000 | -0.431109000 |
| 6  | 2.859966000   | -12.463213000 | -0.393445000 |
| 6  | 6.385282000   | -11.066815000 | -0.447839000 |
| 6  | 1.480785000   | -12.721722000 | -0.328070000 |
| 6  | 7.575568000   | -10.319761000 | -0.409512000 |
| 6  | 0.742296000   | -12.729985000 | -1.513480000 |
| 6  | 0.932786000   | -13.018436000 | 0.984591000  |
| 6  | 8.117261000   | -9.856264000  | -1.607845000 |
| 6  | 8.183552000   | -10.128210000 | 0.899031000  |
| 6  | 1.280093000   | -12.750991000 | -2.853867000 |
| 7  | -0.637854000  | -12.881494000 | -1.549536000 |
| 6  | 1.666293000   | -13.694827000 | 2.019169000  |
| 7  | -0.349779000  | -12.808592000 | 1.330142000  |
| 7  | 9.216043000   | -9.008492000  | -1.675824000 |
| 6  | 7.726958000   | -10.272729000 | -2.938269000 |
| 7  | 9.072513000   | -9.157415000  | 1.175119000  |
| 6  | 7.978416000   | -11.001262000 | 2.023144000  |
| 6  | 0.223907000   | -12.979252000 | -3.684185000 |
| 1  | 2.326191000   | -12.669487000 | -3.114237000 |
| 6  | -0.958553000  | -13.059334000 | -2.845168000 |
| 30 | -1.828744000  | -12.137350000 | -0.007417000 |
| 6  | 0.764411000   | -13.950103000 | 3.011992000  |
| 1  | 2.698281000   | -14.011657000 | 1.960259000  |
| 6  | -0.490636000  | -13.353240000 | 2.606478000  |
| 6  | 9.544096000   | -8.930568000  | -2.975299000 |
| 30 | 9.603291000   | -7.628154000  | -0.134009000 |

|   |              |               |              |
|---|--------------|---------------|--------------|
| 6 | 8.628537000  | -9.716751000  | -3.790973000 |
| 1 | 6.913667000  | -10.944913000 | -3.173598000 |
| 6 | 9.508249000  | -9.397728000  | 2.475769000  |
| 6 | 8.815075000  | -10.553235000 | 3.005834000  |
| 1 | 7.314188000  | -11.853449000 | 2.050359000  |
| 1 | 0.238964000  | -13.094675000 | -4.757964000 |
| 6 | -2.308716000 | -13.266924000 | -3.358671000 |
| 7 | -3.436397000 | -12.371721000 | -1.343822000 |
| 7 | -3.178782000 | -12.515128000 | 1.536077000  |
| 1 | 0.928817000  | -14.530681000 | 3.907109000  |
| 6 | -1.681598000 | -13.348581000 | 3.346533000  |
| 6 | 10.634355000 | -8.125752000  | -3.516403000 |
| 7 | 10.875872000 | -6.691434000  | -1.499888000 |
| 7 | 10.839721000 | -6.942076000  | 1.417789000  |
| 1 | 8.680652000  | -9.825372000  | -4.864214000 |
| 6 | 10.425408000 | -8.618206000  | 3.189696000  |
| 1 | 8.931231000  | -10.951388000 | 4.003293000  |
| 6 | -3.453195000 | -12.937592000 | -2.618899000 |
| 6 | -4.726632000 | -12.216154000 | -0.998142000 |
| 6 | -2.920232000 | -12.773869000 | 2.832281000  |
| 6 | -4.462304000 | -11.986250000 | 1.499434000  |
| 6 | 11.238508000 | -7.090035000  | -2.791794000 |
| 6 | 11.717424000 | -5.691931000  | -1.178052000 |
| 6 | 11.512133000 | -5.731880000  | 1.340469000  |
| 6 | 10.939391000 | -7.344276000  | 2.702086000  |
| 6 | -4.825049000 | -13.162949000 | -3.023068000 |
| 6 | -5.619865000 | -12.664615000 | -2.031111000 |
| 6 | -5.170449000 | -11.775880000 | 0.313709000  |
| 6 | -4.033749000 | -12.367321000 | 3.670523000  |
| 6 | -4.984878000 | -11.855478000 | 2.839458000  |
| 6 | 12.369600000 | -6.301197000  | -3.230057000 |
| 6 | 12.635644000 | -5.396495000  | -2.242447000 |
| 6 | 11.813252000 | -5.084011000  | 0.141829000  |
| 6 | 12.009720000 | -5.354072000  | 2.644108000  |
| 6 | 11.705700000 | -6.381827000  | 3.480263000  |
| 1 | -5.144893000 | -13.677341000 | -3.916628000 |
| 1 | -6.699249000 | -12.681688000 | -1.971616000 |
| 6 | -6.423036000 | -11.144257000 | 0.379261000  |
| 1 | -4.080473000 | -12.472671000 | 4.744417000  |
| 1 | -5.967179000 | -11.486255000 | 3.099245000  |
| 1 | 12.926336000 | -6.449456000  | -4.143036000 |
| 1 | 13.431869000 | -4.666105000  | -2.206740000 |
| 6 | 12.318745000 | -3.774686000  | 0.195353000  |
| 1 | 12.598609000 | -4.474088000  | 2.861847000  |
| 1 | 12.013876000 | -6.493076000  | 4.507398000  |
| 6 | -7.439608000 | -10.459064000 | 0.403499000  |
| 6 | 12.598561000 | -2.580842000  | 0.217652000  |
| 6 | 12.795971000 | -1.249855000  | 0.252670000  |
| 6 | 12.874494000 | -0.026663000  | 0.293653000  |
| 6 | 12.770499000 | 1.373936000   | 0.312841000  |
| 6 | 12.654109000 | 2.013135000   | 1.549221000  |
| 6 | 12.873610000 | 2.051595000   | -0.971078000 |
| 6 | 13.013536000 | 1.436110000   | 2.824505000  |
| 7 | 12.352610000 | 3.357000000   | 1.701092000  |
| 7 | 12.382378000 | 3.275974000   | -1.232457000 |
| 6 | 13.668731000 | 1.547433000   | -2.057050000 |
| 6 | 13.007615000 | 2.458933000   | 3.720952000  |
| 1 | 13.327281000 | 0.414455000   | 2.986907000  |
| 6 | 12.553132000 | 3.641546000   | 3.006327000  |

|    |              |              |              |
|----|--------------|--------------|--------------|
| 30 | 11.417666000 | 4.464906000  | 0.185073000  |
| 6  | 12.861118000 | 3.613081000  | -2.502905000 |
| 6  | 13.702124000 | 2.541616000  | -2.991948000 |
| 1  | 14.203313000 | 0.607863000  | -2.067043000 |
| 1  | 13.327851000 | 2.419351000  | 4.749736000  |
| 6  | 12.416203000 | 4.978314000  | 3.571116000  |
| 7  | 11.334499000 | 6.004741000  | 1.583279000  |
| 7  | 11.469907000 | 5.974491000  | -1.276311000 |
| 6  | 12.604313000 | 4.821126000  | -3.165147000 |
| 1  | 14.285524000 | 2.560916000  | -3.900024000 |
| 6  | 11.780400000 | 6.030946000  | 2.901328000  |
| 6  | 10.758081000 | 7.199724000  | 1.364852000  |
| 6  | 10.676840000 | 7.107416000  | -1.157128000 |
| 6  | 11.793454000 | 5.882054000  | -2.577713000 |
| 6  | 11.423370000 | 7.299569000  | 3.501981000  |
| 6  | 10.773362000 | 8.023900000  | 2.543612000  |
| 6  | 10.266350000 | 7.636922000  | 0.067596000  |
| 6  | 10.463105000 | 7.703908000  | -2.457817000 |
| 6  | 11.176855000 | 6.955623000  | -3.342250000 |
| 1  | 11.617039000 | 7.586011000  | 4.525406000  |
| 1  | 10.373182000 | 9.024862000  | 2.622010000  |
| 6  | 9.348474000  | 8.701078000  | 0.064835000  |
| 1  | 9.895662000  | 8.603319000  | -2.651879000 |
| 1  | 11.285255000 | 7.110897000  | -4.405477000 |
| 6  | 8.445212000  | 9.529350000  | 0.090208000  |
| 6  | 7.391801000  | 10.368031000 | 0.110520000  |
| 6  | 6.382028000  | 11.062466000 | 0.135823000  |
| 6  | 5.139789000  | 11.719693000 | 0.132936000  |
| 6  | 4.520166000  | 11.977845000 | 1.356911000  |
| 6  | 4.616894000  | 12.127082000 | -1.161781000 |
| 6  | 5.136685000  | 11.876652000 | 2.661986000  |
| 7  | 3.237807000  | 12.496050000 | 1.473937000  |
| 7  | 3.326020000  | 12.428666000 | -1.387021000 |
| 6  | 5.428712000  | 12.347658000 | -2.328567000 |
| 6  | 4.239579000  | 12.388005000 | 3.548015000  |
| 1  | 6.138080000  | 11.520180000 | 2.858711000  |
| 6  | 3.062901000  | 12.764943000 | 2.779256000  |
| 30 | 1.792069000  | 12.138909000 | -0.010111000 |
| 6  | 3.265729000  | 12.895345000 | -2.696743000 |
| 6  | 4.587791000  | 12.839874000 | -3.285704000 |
| 1  | 6.494202000  | 12.180678000 | -2.399829000 |
| 1  | 4.356412000  | 12.507113000 | 4.615008000  |
| 6  | 1.842082000  | 13.306707000 | 3.365881000  |
| 7  | 0.404895000  | 12.787631000 | 1.406893000  |
| 7  | 0.519322000  | 12.836098000 | -1.525332000 |
| 6  | 2.105254000  | 13.296450000 | -3.370034000 |
| 1  | 4.834238000  | 13.112281000 | -4.301587000 |
| 6  | 0.614221000  | 13.302449000 | 2.690769000  |
| 6  | -0.895381000 | 12.999801000 | 1.137049000  |
| 6  | -0.859327000 | 12.832295000 | -1.387257000 |
| 6  | 0.765764000  | 13.123312000 | -2.822114000 |
| 6  | -0.622393000 | 13.873872000 | 3.179514000  |
| 6  | -1.574711000 | 13.640047000 | 2.229889000  |
| 6  | -1.520532000 | 12.776594000 | -0.158350000 |
| 6  | -1.488771000 | 13.084535000 | -2.663522000 |
| 6  | -0.480763000 | 13.322990000 | -3.544906000 |
| 1  | -0.742486000 | 14.427842000 | 4.098223000  |
| 1  | -2.609629000 | 13.952458000 | 2.235996000  |
| 6  | -2.908761000 | 12.564103000 | -0.156272000 |

|   |               |              |              |
|---|---------------|--------------|--------------|
| 1 | -2.552808000  | 13.170167000 | -2.834223000 |
| 1 | -0.579305000  | 13.649865000 | -4.567635000 |
| 6 | -4.083185000  | 12.212032000 | -0.123180000 |
| 6 | 1.945154000   | 13.861992000 | 4.715702000  |
| 6 | 1.008121000   | 13.541412000 | 5.730719000  |
| 6 | 2.985706000   | 14.779928000 | 5.013909000  |
| 1 | 0.247254000   | 12.791904000 | 5.536816000  |
| 1 | 3.697406000   | 15.057741000 | 4.242362000  |
| 6 | 1.102282000   | 14.127087000 | 6.985487000  |
| 6 | 3.047345000   | 15.392867000 | 6.257597000  |
| 1 | 0.398953000   | 13.855207000 | 7.766138000  |
| 1 | 3.816716000   | 16.131189000 | 6.460214000  |
| 6 | 2.110000000   | 15.065980000 | 7.249196000  |
| 1 | 2.171096000   | 15.535631000 | 8.226364000  |
| 6 | 2.255375000   | 13.997470000 | -4.650518000 |
| 6 | 3.105920000   | 15.135476000 | -4.700327000 |
| 6 | 1.584767000   | 13.595409000 | -5.831387000 |
| 1 | 3.594862000   | 15.474490000 | -3.792581000 |
| 1 | 0.982429000   | 12.692398000 | -5.830955000 |
| 6 | 3.247762000   | 15.860065000 | -5.877332000 |
| 6 | 1.766940000   | 14.299371000 | -7.012198000 |
| 1 | 3.866360000   | 16.751791000 | -5.893179000 |
| 1 | 1.282656000   | 13.963800000 | -7.923824000 |
| 6 | 2.582600000   | 15.445132000 | -7.036656000 |
| 1 | 2.694530000   | 16.009088000 | -7.957831000 |
| 6 | -11.233885000 | 8.803073000  | 4.443050000  |
| 6 | -10.482266000 | 8.995489000  | 5.627933000  |
| 6 | -12.632755000 | 9.054732000  | 4.471681000  |
| 1 | -9.425756000  | 8.747050000  | 5.644966000  |
| 1 | -13.211576000 | 8.946797000  | 3.559921000  |
| 6 | -11.108706000 | 9.413778000  | 6.792252000  |
| 6 | -13.243755000 | 9.515537000  | 5.631332000  |
| 1 | -10.535659000 | 9.521243000  | 7.707824000  |
| 1 | -14.304606000 | 9.745069000  | 5.630098000  |
| 6 | -12.487050000 | 9.694528000  | 6.794967000  |
| 1 | -12.963754000 | 10.052334000 | 7.702639000  |
| 6 | -10.818077000 | 8.697901000  | -4.918210000 |
| 6 | -9.905505000  | 9.082437000  | -5.933376000 |
| 6 | -12.201964000 | 8.647466000  | -5.229192000 |
| 1 | -8.839756000  | 9.061503000  | -5.728411000 |
| 1 | -12.918589000 | 8.380400000  | -4.458411000 |
| 6 | -10.362584000 | 9.415713000  | -7.200764000 |
| 6 | -12.654112000 | 9.023143000  | -6.486408000 |
| 1 | -9.656048000  | 9.681012000  | -7.980781000 |
| 1 | -13.718298000 | 9.029636000  | -6.699879000 |
| 6 | -11.737219000 | 9.403795000  | -7.477996000 |
| 1 | -12.093516000 | 9.681486000  | -8.465470000 |
| 6 | -13.212858000 | -4.889192000 | 4.831321000  |
| 6 | -14.626800000 | -4.746163000 | 4.869631000  |
| 6 | -12.527177000 | -5.211350000 | 6.027915000  |
| 1 | -15.165522000 | -4.536213000 | 3.951075000  |
| 1 | -11.442821000 | -5.258739000 | 6.034728000  |
| 6 | -15.325691000 | -4.954567000 | 6.052273000  |
| 6 | -13.229394000 | -5.374388000 | 7.212559000  |
| 1 | -16.408774000 | -4.884210000 | 6.060954000  |
| 1 | -12.695829000 | -5.581050000 | 8.134954000  |
| 6 | -14.631924000 | -5.266855000 | 7.226937000  |
| 1 | -15.176626000 | -5.428002000 | 8.152396000  |
| 6 | -13.033172000 | -5.441191000 | -4.494041000 |

|   |               |               |              |
|---|---------------|---------------|--------------|
| 6 | -12.306626000 | -6.141998000  | -5.490491000 |
| 6 | -14.348731000 | -5.000082000  | -4.793310000 |
| 1 | -11.276330000 | -6.424942000  | -5.299163000 |
| 1 | -14.930433000 | -4.484444000  | -4.035193000 |
| 6 | -12.880194000 | -6.401604000  | -6.727306000 |
| 6 | -14.929724000 | -5.300870000  | -6.017163000 |
| 1 | -12.307846000 | -6.912211000  | -7.495208000 |
| 1 | -15.953795000 | -5.003003000  | -6.218773000 |
| 6 | -14.197203000 | -5.997884000  | -6.990184000 |
| 1 | -14.649355000 | -6.216717000  | -7.952918000 |
| 6 | -1.727597000  | -13.928389000 | 4.687140000  |
| 6 | -2.781677000  | -14.817834000 | 5.026233000  |
| 6 | -0.723842000  | -13.662291000 | 5.654015000  |
| 1 | -3.544512000  | -15.054967000 | 4.290966000  |
| 1 | 0.048489000   | -12.932314000 | 5.433711000  |
| 6 | -2.793936000  | -15.456632000 | 6.257933000  |
| 6 | -0.768105000  | -14.272117000 | 6.899467000  |
| 1 | -3.575406000  | -16.173563000 | 6.488982000  |
| 1 | -0.014006000  | -14.040530000 | 7.644905000  |
| 6 | -1.791216000  | -15.183406000 | 7.200692000  |
| 1 | -1.812937000  | -15.672871000 | 8.169803000  |
| 6 | -2.426535000  | -13.839140000 | -4.698124000 |
| 6 | -3.317160000  | -13.306034000 | -5.665517000 |
| 6 | -1.661821000  | -14.987402000 | -5.035486000 |
| 1 | -3.855547000  | -12.389440000 | -5.446701000 |
| 1 | -0.994653000  | -15.426045000 | -4.299781000 |
| 6 | -3.445315000  | -13.906611000 | -6.909662000 |
| 6 | -1.828698000  | -15.606815000 | -6.265825000 |
| 1 | -4.105741000  | -13.475831000 | -7.655472000 |
| 1 | -1.277827000  | -16.513380000 | -6.495485000 |
| 6 | -2.716518000  | -15.067256000 | -7.209053000 |
| 1 | -2.832594000  | -15.545398000 | -8.177107000 |
| 6 | 10.959196000  | -9.153944000  | 4.447770000  |
| 6 | 11.539205000  | -10.451773000 | 4.434548000  |
| 6 | 10.929705000  | -8.432345000  | 5.666013000  |
| 1 | 11.600429000  | -10.997822000 | 3.498533000  |
| 1 | 10.432396000  | -7.468666000  | 5.712499000  |
| 6 | 12.099112000  | -10.986609000 | 5.588236000  |
| 6 | 11.451981000  | -8.992682000  | 6.822029000  |
| 1 | 12.576992000  | -11.960650000 | 5.557048000  |
| 1 | 11.390797000  | -8.452734000  | 7.761670000  |
| 6 | 12.056385000  | -10.262361000 | 6.785035000  |
| 1 | 12.491733000  | -10.679984000 | 7.687922000  |
| 6 | 11.080455000  | -8.442341000  | -4.872933000 |
| 6 | 11.345466000  | -9.792184000  | -5.222609000 |
| 6 | 11.295173000  | -7.432190000  | -5.845156000 |
| 1 | 11.211810000  | -10.577095000 | -4.484310000 |
| 1 | 11.032653000  | -6.404794000  | -5.613349000 |
| 6 | 11.858766000  | -10.106683000 | -6.473033000 |
| 6 | 11.768872000  | -7.760369000  | -7.107736000 |
| 1 | 12.105331000  | -11.135767000 | -6.714459000 |
| 1 | 11.902879000  | -6.985749000  | -7.856057000 |
| 6 | 12.067862000  | -9.093970000  | -7.421647000 |
| 1 | 12.453793000  | -9.346087000  | -8.404841000 |
| 6 | 13.044012000  | 5.261296000   | 4.866988000  |
| 6 | 12.779502000  | 4.501795000   | 6.032823000  |
| 6 | 13.964753000  | 6.341446000   | 4.948284000  |
| 1 | 12.032016000  | 3.715107000   | 6.008292000  |
| 1 | 14.203102000  | 6.905997000   | 4.052485000  |

|   |              |              |              |
|---|--------------|--------------|--------------|
| 6 | 13.404937000 | 4.818210000  | 7.229361000  |
| 6 | 14.619231000 | 6.623172000  | 6.141053000  |
| 1 | 13.168833000 | 4.258882000  | 8.129143000  |
| 1 | 15.351680000 | 7.423175000  | 6.181099000  |
| 6 | 14.341378000 | 5.866397000  | 7.285095000  |
| 1 | 14.850411000 | 6.087032000  | 8.218554000  |
| 6 | 13.147667000 | 5.065568000  | -4.501487000 |
| 6 | 13.814855000 | 6.289387000  | -4.768982000 |
| 6 | 13.063710000 | 4.096103000  | -5.533058000 |
| 1 | 13.912075000 | 7.033410000  | -3.984164000 |
| 1 | 12.499944000 | 3.184159000  | -5.363361000 |
| 6 | 14.421145000 | 6.505429000  | -5.998601000 |
| 6 | 13.636309000 | 4.337937000  | -6.773995000 |
| 1 | 14.972079000 | 7.423402000  | -6.177210000 |
| 1 | 13.542972000 | 3.603679000  | -7.567819000 |
| 6 | 14.330488000 | 5.533980000  | -7.006932000 |
| 1 | 14.792246000 | 5.713413000  | -7.973238000 |
| 6 | -0.209461000 | -1.384050000 | 0.004392000  |
| 6 | -1.317803000 | -0.500411000 | 0.008713000  |
| 6 | 1.110804000  | -0.867701000 | 0.000020000  |
| 6 | -1.107152000 | 0.902739000  | 0.002377000  |
| 6 | 1.324043000  | 0.535051000  | 0.005523000  |
| 6 | 0.214466000  | 1.420976000  | 0.003927000  |
| 6 | -2.720214000 | -1.055675000 | 0.026861000  |
| 6 | -3.550633000 | -0.897221000 | 1.147894000  |
| 6 | -3.246047000 | -1.749844000 | -1.074604000 |
| 1 | -3.175363000 | -0.369122000 | 2.019445000  |
| 1 | -2.633371000 | -1.888594000 | -1.960314000 |
| 6 | -4.846938000 | -1.412112000 | 1.169217000  |
| 6 | -4.545736000 | -2.256115000 | -1.060237000 |
| 1 | -5.436160000 | -1.296946000 | 2.074230000  |
| 1 | -4.919680000 | -2.750418000 | -1.951996000 |
| 6 | -5.380230000 | -2.102475000 | 0.063701000  |
| 6 | -0.435574000 | -2.875630000 | 0.002959000  |
| 6 | -0.937355000 | -3.538287000 | 1.134206000  |
| 6 | -0.152912000 | -3.654034000 | -1.130538000 |
| 1 | -1.164458000 | -2.968071000 | 2.030154000  |
| 1 | 0.233605000  | -3.174363000 | -2.024935000 |
| 6 | -1.140249000 | -4.918463000 | 1.135835000  |
| 6 | -0.369217000 | -5.032079000 | -1.136397000 |
| 1 | -1.491445000 | -5.388282000 | 2.049668000  |
| 1 | -0.173066000 | -5.582143000 | -2.051867000 |
| 6 | -0.865189000 | -5.702571000 | -0.001379000 |
| 6 | 2.285447000  | -1.814157000 | -0.018436000 |
| 6 | 2.580437000  | -2.635473000 | 1.081693000  |
| 6 | 3.124763000  | -1.909991000 | -1.139972000 |
| 1 | 1.954809000  | -2.586032000 | 1.967843000  |
| 1 | 2.924232000  | -1.292877000 | -2.010772000 |
| 6 | 3.668936000  | -3.507835000 | 1.065378000  |
| 6 | 4.207275000  | -2.789594000 | -1.163251000 |
| 1 | 3.878157000  | -4.092799000 | 1.956157000  |
| 1 | 4.803066000  | -2.854705000 | -2.068918000 |
| 6 | 4.510446000  | -3.609731000 | -0.059213000 |
| 6 | 2.729872000  | 1.081880000  | 0.017896000  |
| 6 | 3.583070000  | 0.863787000  | 1.112238000  |
| 6 | 3.234837000  | 1.832289000  | -1.056622000 |
| 1 | 3.230949000  | 0.275932000  | 1.954421000  |
| 1 | 2.598648000  | 2.032201000  | -1.913484000 |
| 6 | 4.877818000  | 1.382444000  | 1.138297000  |

|   |              |               |              |
|---|--------------|---------------|--------------|
| 6 | 4.535041000  | 2.338368000   | -1.040855000 |
| 1 | 5.507127000  | 1.175791000   | 1.999321000  |
| 1 | 4.877313000  | 2.928472000   | -1.886322000 |
| 6 | 5.386728000  | 2.130883000   | 0.060400000  |
| 6 | 0.440286000  | 2.912674000   | 0.003319000  |
| 6 | 0.049577000  | 3.708856000   | -1.085808000 |
| 6 | 1.050551000  | 3.558529000   | 1.091124000  |
| 1 | -0.438624000 | 3.245124000   | -1.937645000 |
| 1 | 1.378587000  | 2.972129000   | 1.944057000  |
| 6 | 0.267314000  | 5.086951000   | -1.092531000 |
| 6 | 1.254171000  | 4.938763000   | 1.094679000  |
| 1 | -0.065588000 | 5.665419000   | -1.949675000 |
| 1 | 1.744549000  | 5.393462000   | 1.950798000  |
| 6 | 0.871499000  | 5.736611000   | 0.000145000  |
| 6 | -2.290480000 | 1.838255000   | -0.010418000 |
| 6 | -2.555352000 | 2.702200000   | 1.064748000  |
| 6 | -3.171521000 | 1.877129000   | -1.103825000 |
| 1 | -1.887344000 | 2.709345000   | 1.920707000  |
| 1 | -3.005200000 | 1.213488000   | -1.946854000 |
| 6 | -3.654988000 | 3.561098000   | 1.051607000  |
| 6 | -4.262402000 | 2.746180000   | -1.127123000 |
| 1 | -3.811312000 | 4.224189000   | 1.897809000  |
| 1 | -4.925962000 | 2.730105000   | -1.987075000 |
| 6 | -4.533111000 | 3.607598000   | -0.047500000 |
| 6 | 5.673321000  | -4.543090000  | -0.079489000 |
| 6 | 6.822721000  | -4.295033000  | -0.855713000 |
| 6 | 7.886763000  | -5.190766000  | -0.851037000 |
| 7 | 7.899844000  | -6.320933000  | -0.115266000 |
| 6 | 6.808695000  | -6.571155000  | 0.636622000  |
| 6 | 5.699718000  | -5.732174000  | 0.676476000  |
| 1 | 6.906173000  | -3.394181000  | -1.453672000 |
| 1 | 8.774811000  | -5.011480000  | -1.448990000 |
| 1 | 6.839843000  | -7.486004000  | 1.220433000  |
| 1 | 4.851776000  | -6.021895000  | 1.287419000  |
| 6 | -1.088476000 | -7.177222000  | -0.003779000 |
| 6 | -0.372645000 | -8.046754000  | -0.850302000 |
| 6 | -0.614956000 | -9.416208000  | -0.827690000 |
| 7 | -1.514055000 | -9.999079000  | -0.008621000 |
| 6 | -2.202191000 | -9.179778000  | 0.812496000  |
| 6 | -2.029748000 | -7.799718000  | 0.839912000  |
| 1 | 0.390753000  | -7.668675000  | -1.521250000 |
| 1 | -0.067452000 | -10.085008000 | -1.484200000 |
| 1 | -2.923140000 | -9.659964000  | 1.466679000  |
| 1 | -2.647956000 | -7.215411000  | 1.512468000  |
| 6 | -6.767818000 | -2.647717000  | 0.082413000  |
| 6 | -7.143080000 | -3.776560000  | -0.672699000 |
| 6 | -8.449199000 | -4.253047000  | -0.631179000 |
| 7 | -9.417665000 | -3.693110000  | 0.122009000  |
| 6 | -9.073633000 | -2.614018000  | 0.853855000  |
| 6 | -7.793569000 | -2.069935000  | 0.856801000  |
| 1 | -6.417913000 | -4.303569000  | -1.283051000 |
| 1 | -8.750267000 | -5.119063000  | -1.212420000 |
| 1 | -9.868215000 | -2.179026000  | 1.452154000  |
| 1 | -7.608081000 | -1.183138000  | 1.452849000  |
| 6 | -5.701779000 | 4.532759000   | -0.069773000 |
| 6 | -6.152819000 | 5.139148000   | -1.258649000 |
| 6 | -7.245218000 | 6.000421000   | -1.238156000 |
| 7 | -7.927613000 | 6.299962000   | -0.114704000 |
| 6 | -7.509599000 | 5.724989000   | 1.030827000  |



|   |              |              |              |
|---|--------------|--------------|--------------|
| 6 | -6.424297000 | 4.856749000  | 1.095416000  |
| 1 | -5.641037000 | 4.964655000  | -2.199109000 |
| 1 | -7.593486000 | 6.487917000  | -2.143677000 |
| 1 | -8.082018000 | 5.974766000  | 1.919132000  |
| 1 | -6.160593000 | 4.417623000  | 2.051759000  |
| 6 | 1.095674000  | 7.210418000  | -0.001528000 |
| 6 | 1.414481000  | 7.918054000  | -1.177194000 |
| 6 | 1.614058000  | 9.294382000  | -1.136813000 |
| 7 | 1.515169000  | 10.021582000 | -0.005881000 |
| 6 | 1.210436000  | 9.358192000  | 1.127527000  |
| 6 | 1.000171000  | 7.983550000  | 1.172141000  |
| 1 | 1.531770000  | 7.398955000  | -2.122549000 |
| 1 | 1.870880000  | 9.850696000  | -2.033286000 |
| 1 | 1.123190000  | 9.969222000  | 2.020814000  |
| 1 | 0.736258000  | 7.524310000  | 2.118901000  |
| 6 | 6.771911000  | 2.681205000  | 0.086168000  |
| 6 | 7.560790000  | 2.781470000  | -1.076598000 |
| 6 | 8.852287000  | 3.294610000  | -1.007866000 |
| 7 | 9.416321000  | 3.721997000  | 0.139598000  |
| 6 | 8.671719000  | 3.636769000  | 1.260242000  |
| 6 | 7.375303000  | 3.132264000  | 1.276630000  |
| 1 | 7.183999000  | 2.437257000  | -2.033936000 |
| 1 | 9.478084000  | 3.361819000  | -1.892626000 |
| 1 | 9.145021000  | 3.997432000  | 2.168528000  |
| 1 | 6.831736000  | 3.114648000  | 2.215287000  |

**c-P6-T6<sup>+12</sup>** optimized with **CAM-B3LYP** - E=-23374.778178au

|   |              |               |              |
|---|--------------|---------------|--------------|
| 6 | 8.305225000  | -9.726685000  | 1.196674000  |
| 6 | 8.065819000  | -10.227328000 | 2.535755000  |
| 6 | 9.018388000  | -9.684188000  | 3.321021000  |
| 6 | 9.790173000  | -8.780399000  | 2.477082000  |
| 7 | 9.359549000  | -8.812185000  | 1.223219000  |
| 1 | 7.328227000  | -10.970984000 | 2.801570000  |
| 1 | 9.216850000  | -9.902881000  | 4.357818000  |
| 6 | 10.951405000 | -7.996589000  | 2.917035000  |
| 6 | 11.463672000 | -6.956785000  | 2.181278000  |
| 6 | 12.517467000 | -6.061928000  | 2.616768000  |
| 7 | 11.037080000 | -6.563700000  | 0.904541000  |
| 6 | 12.716920000 | -5.168506000  | 1.616980000  |
| 1 | 13.016967000 | -6.110248000  | 3.573121000  |
| 6 | 11.793955000 | -5.529416000  | 0.574884000  |
| 1 | 13.429763000 | -4.357935000  | 1.575522000  |
| 6 | 11.752300000 | -4.872776000  | -0.735019000 |
| 6 | 11.374659000 | -5.495971000  | -1.892711000 |
| 6 | 11.594030000 | -5.021603000  | -3.246671000 |
| 7 | 10.828768000 | -6.782186000  | -1.931792000 |
| 6 | 11.245239000 | -6.035166000  | -4.065630000 |
| 1 | 12.019772000 | -4.064360000  | -3.511455000 |
| 6 | 10.769666000 | -7.115759000  | -3.209381000 |
| 1 | 11.308386000 | -6.077042000  | -5.142620000 |
| 6 | 10.263768000 | -8.396755000  | -3.718897000 |
| 6 | 9.455425000  | -9.213530000  | -2.961620000 |
| 6 | 8.976251000  | -10.525001000 | -3.345217000 |
| 7 | 9.003796000  | -8.931864000  | -1.660124000 |
| 6 | 8.215585000  | -10.986621000 | -2.322444000 |
| 1 | 9.233630000  | -11.041651000 | -4.257477000 |
| 6 | 8.283831000  | -9.983462000  | -1.297143000 |

|    |              |               |              |
|----|--------------|---------------|--------------|
| 1  | 7.720409000  | -11.943189000 | -2.237453000 |
| 6  | 7.730628000  | -10.189783000 | 0.044649000  |
| 30 | 9.649043000  | -7.464833000  | -0.341422000 |
| 6  | 6.569859000  | -10.990830000 | 0.126389000  |
| 6  | 5.491147000  | -11.544815000 | 0.157915000  |
| 6  | 12.189259000 | -3.529800000  | -0.779425000 |
| 6  | 12.439770000 | -2.343203000  | -0.762696000 |
| 6  | 12.195984000 | 5.568093000   | -3.367815000 |
| 6  | 11.611592000 | 6.526177000   | -2.570222000 |
| 6  | 12.333510000 | 4.172964000   | -2.930896000 |
| 6  | 11.513055000 | 7.937450000   | -2.874986000 |
| 7  | 11.063781000 | 6.301985000   | -1.294570000 |
| 6  | 12.510600000 | 3.051307000   | -3.846980000 |
| 7  | 12.287648000 | 3.769286000   | -1.674127000 |
| 6  | 10.876008000 | 8.528375000   | -1.833426000 |
| 1  | 11.926209000 | 8.417587000   | -3.749171000 |
| 6  | 10.644268000 | 7.487618000   | -0.873417000 |
| 30 | 11.284515000 | 4.648560000   | -0.058313000 |
| 6  | 12.563488000 | 1.939156000   | -3.086059000 |
| 1  | 12.594224000 | 3.132564000   | -4.920353000 |
| 6  | 12.464699000 | 2.382317000   | -1.707324000 |
| 1  | 10.653644000 | 9.576535000   | -1.694301000 |
| 6  | 10.129103000 | 7.754089000   | 0.472853000  |
| 7  | 12.363688000 | 3.349713000   | 1.142486000  |
| 7  | 11.338863000 | 5.949089000   | 1.574026000  |
| 1  | 12.717349000 | 0.917870000   | -3.403854000 |
| 6  | 12.644565000 | 1.620784000   | -0.585932000 |
| 6  | 10.542954000 | 7.096746000   | 1.598117000  |
| 6  | 9.206682000  | 8.818332000   | 0.591147000  |
| 6  | 12.842701000 | 2.177660000   | 0.755871000  |
| 6  | 12.870307000 | 3.561156000   | 2.433578000  |
| 6  | 11.715354000 | 5.734128000   | 2.825843000  |
| 6  | 12.704234000 | 0.213593000   | -0.697305000 |
| 6  | 10.401712000 | 7.558237000   | 2.965736000  |
| 6  | 8.307317000  | 9.630517000   | 0.643445000  |
| 6  | 13.640624000 | 1.546615000   | 1.771660000  |
| 6  | 13.664849000 | 2.411096000   | 2.816026000  |
| 6  | 12.635454000 | 4.660198000   | 3.221471000  |
| 6  | 11.170342000 | 6.748896000   | 3.721538000  |
| 6  | 12.624987000 | -0.996189000  | -0.733061000 |
| 1  | 9.864141000  | 8.443668000   | 3.273455000  |
| 1  | 14.129068000 | 0.587022000   | 1.684591000  |
| 1  | 14.156435000 | 2.286028000   | 3.769568000  |
| 1  | 11.390163000 | 6.846616000   | 4.772353000  |
| 6  | -4.195139000 | 12.013553000  | 0.008146000  |
| 6  | -5.455391000 | 11.503645000  | -0.022230000 |
| 6  | -3.040362000 | 12.383903000  | 0.030684000  |
| 6  | -6.542489000 | 10.966122000  | -0.039777000 |
| 6  | -1.657249000 | 12.663059000  | 0.090915000  |
| 6  | -7.725857000 | 10.194841000  | -0.078321000 |
| 6  | -0.934042000 | 12.719975000  | -1.069297000 |
| 6  | -1.100047000 | 12.940115000  | 1.417282000  |
| 6  | -8.317694000 | 9.959545000   | -1.397475000 |
| 6  | -8.270252000 | 9.756257000   | 1.098528000  |
| 6  | -1.456003000 | 12.768184000  | -2.420713000 |
| 7  | 0.450703000  | 12.907180000  | -1.097517000 |
| 6  | -1.832500000 | 13.613681000  | 2.452419000  |
| 7  | 0.156522000  | 12.696693000  | 1.756421000  |
| 7  | -9.128282000 | 8.949876000   | -1.671058000 |

|    |               |              |              |
|----|---------------|--------------|--------------|
| 6  | -8.136177000  | 10.840368000 | -2.519859000 |
| 7  | -9.365123000  | 8.891508000  | 1.163842000  |
| 6  | -7.925856000  | 10.202633000 | 2.435853000  |
| 6  | -0.407263000  | 13.051864000 | -3.223167000 |
| 1  | -2.497028000  | 12.667178000 | -2.692451000 |
| 6  | 0.764961000   | 13.133919000 | -2.363111000 |
| 30 | 1.634870000   | 12.099569000 | 0.408073000  |
| 6  | -0.946780000  | 13.819076000 | 3.458633000  |
| 1  | -2.857647000  | 13.948852000 | 2.386116000  |
| 6  | 0.304197000   | 13.212594000 | 3.053363000  |
| 6  | -9.541435000  | 9.141578000  | -2.995825000 |
| 30 | -9.673857000  | 7.461152000  | -0.334681000 |
| 6  | -8.905366000  | 10.336669000 | -3.515459000 |
| 1  | -7.521116000  | 11.728375000 | -2.533042000 |
| 6  | -9.730505000  | 8.856171000  | 2.434754000  |
| 6  | -8.847367000  | 9.667366000  | 3.264040000  |
| 1  | -7.127062000  | 10.888565000 | 2.679010000  |
| 1  | -0.407027000  | 13.214800000 | -4.290505000 |
| 6  | 2.118553000   | 13.419341000 | -2.856795000 |
| 7  | 3.233540000   | 12.421874000 | -0.896521000 |
| 7  | 2.969160000   | 12.427537000 | 1.967782000  |
| 1  | -1.107403000  | 14.370464000 | 4.372720000  |
| 6  | 1.466075000   | 13.176210000 | 3.790220000  |
| 6  | -10.371998000 | 8.313639000  | -3.710704000 |
| 7  | -10.833680000 | 6.706493000  | -1.898174000 |
| 7  | -11.016728000 | 6.596960000  | 0.993114000  |
| 1  | -9.021183000  | 10.714970000 | -4.520340000 |
| 6  | -10.864301000 | 8.086258000  | 2.960123000  |
| 1  | -8.950053000  | 9.807491000  | 4.329560000  |
| 6  | 3.240413000   | 13.083247000 | -2.134937000 |
| 6  | 4.505615000   | 12.300602000 | -0.551033000 |
| 6  | 2.707092000   | 12.601726000 | 3.253548000  |
| 6  | 4.257742000   | 11.889832000 | 1.903796000  |
| 6  | -10.862636000 | 7.033628000  | -3.184290000 |
| 6  | -11.477235000 | 5.472219000  | -1.794962000 |
| 6  | -11.836232000 | 5.604533000  | 0.683386000  |
| 6  | -11.437897000 | 7.055666000  | 2.253107000  |
| 6  | 4.610670000   | 13.384764000 | -2.494394000 |
| 6  | 5.400375000   | 12.861785000 | -1.524204000 |
| 6  | 4.955887000   | 11.759067000 | 0.734094000  |
| 6  | 3.806039000   | 12.133769000 | 4.086229000  |
| 6  | 4.755974000   | 11.667797000 | 3.246337000  |
| 6  | -11.524569000 | 6.001740000  | -3.972185000 |
| 6  | -11.854437000 | 5.011861000  | -3.116360000 |
| 6  | -11.843405000 | 4.904842000  | -0.604484000 |
| 6  | -12.821470000 | 5.361697000  | 1.701101000  |
| 6  | -12.598555000 | 6.290532000  | 2.661888000  |
| 1  | 4.919219000   | 13.962758000 | -3.352366000 |
| 1  | 6.476210000   | 12.913618000 | -1.437830000 |
| 6  | 6.216176000   | 11.122889000 | 0.742672000  |
| 1  | 3.834009000   | 12.185041000 | 5.164357000  |
| 1  | 5.731532000   | 11.274123000 | 3.493610000  |
| 1  | -11.747433000 | 6.058917000  | -5.025470000 |
| 1  | -12.394230000 | 4.100183000  | -3.329587000 |
| 6  | -12.330581000 | 3.579111000  | -0.588930000 |
| 1  | -13.617573000 | 4.633162000  | 1.648215000  |
| 1  | -13.188756000 | 6.476012000  | 3.546530000  |
| 6  | 7.230771000   | 10.459410000 | 0.697907000  |
| 6  | -12.589771000 | 2.396639000  | -0.508410000 |

|    |               |               |              |
|----|---------------|---------------|--------------|
| 6  | -12.767586000 | 1.052625000   | -0.404883000 |
| 6  | -12.823072000 | -0.153416000  | -0.286978000 |
| 6  | -12.707749000 | -1.556462000  | -0.164725000 |
| 6  | -12.628442000 | -2.109210000  | 1.084381000  |
| 6  | -12.768401000 | -2.327721000  | -1.409056000 |
| 6  | -12.976439000 | -1.459361000  | 2.332759000  |
| 7  | -12.365870000 | -3.460042000  | 1.320382000  |
| 7  | -12.213873000 | -3.519090000  | -1.583282000 |
| 6  | -13.571579000 | -1.922770000  | -2.527959000 |
| 6  | -13.002203000 | -2.426962000  | 3.271457000  |
| 1  | -13.257583000 | -0.421451000  | 2.438560000  |
| 6  | -12.584278000 | -3.658784000  | 2.613070000  |
| 30 | -11.306569000 | -4.605690000  | -0.064220000 |
| 6  | -12.652159000 | -3.958472000  | -2.845079000 |
| 6  | -13.530794000 | -2.954158000  | -3.406953000 |
| 1  | -14.148778000 | -1.011715000  | -2.594222000 |
| 1  | -13.316317000 | -2.336637000  | 4.298741000  |
| 6  | -12.495496000 | -4.973639000  | 3.260658000  |
| 7  | -11.252060000 | -6.053760000  | 1.417768000  |
| 7  | -11.279712000 | -6.191464000  | -1.432025000 |
| 6  | -12.341366000 | -5.169763000  | -3.419906000 |
| 1  | -14.082955000 | -3.052617000  | -4.329343000 |
| 6  | -11.833188000 | -6.034099000  | 2.693917000  |
| 6  | -10.730885000 | -7.262483000  | 1.279293000  |
| 6  | -10.447369000 | -7.291966000  | -1.207468000 |
| 6  | -11.508135000 | -6.165232000  | -2.733572000 |
| 6  | -11.595348000 | -7.312350000  | 3.334800000  |
| 6  | -10.901967000 | -8.074315000  | 2.453731000  |
| 6  | -10.119794000 | -7.749198000  | 0.039699000  |
| 6  | -10.120715000 | -7.918402000  | -2.475130000 |
| 6  | -10.799310000 | -7.238010000  | -3.421632000 |
| 1  | -11.906387000 | -7.572634000  | 4.335801000  |
| 1  | -10.556858000 | -9.090902000  | 2.574317000  |
| 6  | -9.178966000  | -8.795600000  | 0.167618000  |
| 1  | -9.505100000  | -8.798152000  | -2.595762000 |
| 1  | -10.843748000 | -7.431662000  | -4.482810000 |
| 6  | -8.279673000  | -9.597969000  | 0.303338000  |
| 6  | -7.207505000  | -10.424598000 | 0.432616000  |
| 6  | -6.200540000  | -11.091782000 | 0.541665000  |
| 6  | -4.946289000  | -11.740288000 | 0.592168000  |
| 6  | -4.307982000  | -11.885394000 | 1.793159000  |
| 6  | -4.438852000  | -12.271419000 | -0.676304000 |
| 6  | -4.874037000  | -11.665301000 | 3.111144000  |
| 7  | -3.018026000  | -12.409047000 | 1.921003000  |
| 7  | -3.156087000  | -12.476812000 | -0.927777000 |
| 6  | -5.287379000  | -12.699496000 | -1.755573000 |
| 6  | -3.959559000  | -12.111489000 | 3.996835000  |
| 1  | -5.864533000  | -11.281034000 | 3.308633000  |
| 6  | -2.813096000  | -12.564462000 | 3.217330000  |
| 30 | -1.611494000  | -12.099760000 | 0.399594000  |
| 6  | -3.108981000  | -13.094579000 | -2.185997000 |
| 6  | -4.460276000  | -13.219438000 | -2.695255000 |
| 1  | -6.365158000  | -12.629527000 | -1.777027000 |
| 1  | -4.035619000  | -12.154200000 | 5.072950000  |
| 6  | -1.580366000  | -13.094695000 | 3.814281000  |
| 7  | -0.194910000  | -12.640947000 | 1.817594000  |
| 7  | -0.368628000  | -12.894610000 | -1.073586000 |
| 6  | -1.972675000  | -13.491371000 | -2.845828000 |
| 1  | -4.725639000  | -13.634895000 | -3.656225000 |

|   |              |               |              |
|---|--------------|---------------|--------------|
| 6 | -0.389192000 | -13.119962000 | 3.125209000  |
| 6 | 1.076836000  | -12.883544000 | 1.534235000  |
| 6 | 1.019981000  | -12.796652000 | -0.970662000 |
| 6 | -0.624431000 | -13.213964000 | -2.335029000 |
| 6 | 0.853606000  | -13.692842000 | 3.598706000  |
| 6 | 1.775094000  | -13.510258000 | 2.621210000  |
| 6 | 1.688283000  | -12.681276000 | 0.217809000  |
| 6 | 1.618107000  | -13.023534000 | -2.271591000 |
| 6 | 0.606210000  | -13.335148000 | -3.106745000 |
| 1 | 0.985174000  | -14.211453000 | 4.536315000  |
| 1 | 2.805355000  | -13.835648000 | 2.605673000  |
| 6 | 3.078676000  | -12.431040000 | 0.198870000  |
| 1 | 2.678871000  | -13.037667000 | -2.476744000 |
| 1 | 0.678033000  | -13.661635000 | -4.131651000 |
| 6 | 4.234587000  | -12.063307000 | 0.189161000  |
| 6 | -1.674389000 | -13.588193000 | 5.189172000  |
| 6 | -0.736678000 | -13.217030000 | 6.169732000  |
| 6 | -2.706377000 | -14.482025000 | 5.533875000  |
| 1 | 0.028339000  | -12.485176000 | 5.931243000  |
| 1 | -3.428104000 | -14.795100000 | 4.785327000  |
| 6 | -0.821065000 | -13.738629000 | 7.450669000  |
| 6 | -2.764883000 | -15.023909000 | 6.806687000  |
| 1 | -0.106821000 | -13.434220000 | 8.207890000  |
| 1 | -3.538313000 | -15.743083000 | 7.053389000  |
| 6 | -1.824719000 | -14.651752000 | 7.767898000  |
| 1 | -1.880158000 | -15.070232000 | 8.767427000  |
| 6 | -2.097458000 | -14.306165000 | -4.064019000 |
| 6 | -2.805866000 | -15.519374000 | -3.986607000 |
| 6 | -1.538909000 | -13.915517000 | -5.293220000 |
| 1 | -3.215348000 | -15.842003000 | -3.034773000 |
| 1 | -1.035526000 | -12.958004000 | -5.384768000 |
| 6 | -2.928699000 | -16.331574000 | -5.105111000 |
| 6 | -1.694490000 | -14.716277000 | -6.411578000 |
| 1 | -3.450959000 | -17.279137000 | -5.029386000 |
| 1 | -1.288958000 | -14.397445000 | -7.365675000 |
| 6 | -2.376238000 | -15.932021000 | -6.317573000 |
| 1 | -2.474357000 | -16.565741000 | -7.192731000 |
| 6 | 11.639016000 | -8.411156000  | 4.149305000  |
| 6 | 10.992031000 | -8.455046000  | 5.396351000  |
| 6 | 12.995497000 | -8.775820000  | 4.066694000  |
| 1 | 9.961507000  | -8.126403000  | 5.488966000  |
| 1 | 13.494354000 | -8.772511000  | 3.102919000  |
| 6 | 11.689196000 | -8.846694000  | 6.526235000  |
| 6 | 13.677595000 | -9.198536000  | 5.198876000  |
| 1 | 11.195523000 | -8.850706000  | 7.491992000  |
| 1 | 14.714587000 | -9.506599000  | 5.120691000  |
| 6 | 13.028086000 | -9.233332000  | 6.428453000  |
| 1 | 13.561765000 | -9.562031000  | 7.314047000  |
| 6 | 10.652478000 | -8.762711000  | -5.081874000 |
| 6 | 9.708292000  | -9.223174000  | -6.017308000 |
| 6 | 12.006782000 | -8.684735000  | -5.459461000 |
| 1 | 8.654965000  | -9.233224000  | -5.756264000 |
| 1 | 12.752867000 | -8.350171000  | -4.744864000 |
| 6 | 10.111517000 | -9.608590000  | -7.285713000 |
| 6 | 12.406288000 | -9.102229000  | -6.717697000 |
| 1 | 9.376749000  | -9.944170000  | -8.009373000 |
| 1 | 13.456381000 | -9.077418000  | -6.987795000 |
| 6 | 11.459982000 | -9.562079000  | -7.633886000 |
| 1 | 11.775347000 | -9.877818000  | -8.622881000 |

|   |               |              |              |
|---|---------------|--------------|--------------|
| 6 | 13.400052000  | 4.829263000  | 4.466520000  |
| 6 | 14.804987000  | 4.846630000  | 4.389323000  |
| 6 | 12.780185000  | 4.972924000  | 5.719884000  |
| 1 | 15.290468000  | 4.765124000  | 3.422146000  |
| 1 | 11.700148000  | 4.905950000  | 5.806299000  |
| 6 | 15.567254000  | 5.030122000  | 5.534299000  |
| 6 | 13.549465000  | 5.122623000  | 6.860859000  |
| 1 | 16.648616000  | 5.072256000  | 5.461840000  |
| 1 | 13.069198000  | 5.202547000  | 7.830073000  |
| 6 | 14.942837000  | 5.166830000  | 6.769795000  |
| 1 | 15.538719000  | 5.308440000  | 7.665346000  |
| 6 | 12.703089000  | 5.891957000  | -4.701231000 |
| 6 | 11.943437000  | 6.645413000  | -5.614852000 |
| 6 | 13.994063000  | 5.468083000  | -5.071902000 |
| 1 | 10.925724000  | 6.925955000  | -5.363550000 |
| 1 | 14.602792000  | 4.901888000  | -4.373285000 |
| 6 | 12.467977000  | 6.977426000  | -6.853456000 |
| 6 | 14.523551000  | 5.831703000  | -6.298299000 |
| 1 | 11.870375000  | 7.540737000  | -7.561768000 |
| 1 | 15.533477000  | 5.536056000  | -6.560764000 |
| 6 | 13.761291000  | 6.584270000  | -7.192266000 |
| 1 | 14.175160000  | 6.857309000  | -8.157379000 |
| 6 | 1.520791000   | 13.701736000 | 5.154259000  |
| 6 | 2.567019000   | 14.571126000 | 5.519724000  |
| 6 | 0.531282000   | 13.387183000 | 6.103772000  |
| 1 | 3.328666000   | 14.841575000 | 4.794534000  |
| 1 | -0.245728000  | 12.672658000 | 5.852366000  |
| 6 | 2.590470000   | 15.145033000 | 6.779368000  |
| 6 | 0.580235000   | 13.939731000 | 7.373314000  |
| 1 | 3.376100000   | 15.845774000 | 7.040127000  |
| 1 | -0.173789000  | 13.678108000 | 8.107602000  |
| 6 | 1.599492000   | 14.828814000 | 7.709165000  |
| 1 | 1.627344000   | 15.271885000 | 8.699215000  |
| 6 | 2.218764000   | 14.073272000 | -4.161929000 |
| 6 | 3.103643000   | 13.607439000 | -5.151360000 |
| 6 | 1.439192000   | 15.216214000 | -4.425211000 |
| 1 | 3.665578000   | 12.694730000 | -4.981857000 |
| 1 | 0.765495000   | 15.602519000 | -3.666205000 |
| 6 | 3.215164000   | 14.275977000 | -6.359817000 |
| 6 | 1.580540000   | 15.897522000 | -5.622170000 |
| 1 | 3.884147000   | 13.901125000 | -7.126707000 |
| 1 | 1.007254000   | 16.800496000 | -5.801705000 |
| 6 | 2.466117000   | 15.427806000 | -6.592472000 |
| 1 | 2.566204000   | 15.958132000 | -7.533751000 |
| 6 | -11.358683000 | 8.463020000  | 4.286873000  |
| 6 | -11.645523000 | 9.813624000  | 4.561169000  |
| 6 | -11.586958000 | 7.499510000  | 5.285266000  |
| 1 | -11.495052000 | 10.568775000 | 3.795391000  |
| 1 | -11.317781000 | 6.464081000  | 5.103022000  |
| 6 | -12.189377000 | 10.178010000 | 5.781402000  |
| 6 | -12.101307000 | 7.876614000  | 6.515747000  |
| 1 | -12.446073000 | 11.214533000 | 5.971205000  |
| 1 | -12.257644000 | 7.132157000  | 7.288762000  |
| 6 | -12.415539000 | 9.211487000  | 6.761714000  |
| 1 | -12.832001000 | 9.502391000  | 7.720443000  |
| 6 | -10.871607000 | 8.758499000  | -5.019968000 |
| 6 | -11.562698000 | 9.982341000  | -5.091380000 |
| 6 | -10.681917000 | 8.008949000  | -6.194027000 |
| 1 | -11.739074000 | 10.552589000 | -4.185069000 |

|   |               |              |              |
|---|---------------|--------------|--------------|
| 1 | -10.105507000 | 7.089336000  | -6.167205000 |
| 6 | -12.072099000 | 10.429927000 | -6.302048000 |
| 6 | -11.165045000 | 8.478949000  | -7.402877000 |
| 1 | -12.629374000 | 11.359525000 | -6.342646000 |
| 1 | -10.990499000 | 7.913555000  | -8.311868000 |
| 6 | -11.873366000 | 9.682074000  | -7.458004000 |
| 1 | -12.269702000 | 10.032933000 | -8.405083000 |
| 6 | -13.225894000 | -5.175685000 | 4.521176000  |
| 6 | -12.967800000 | -4.413277000 | 5.673472000  |
| 6 | -14.216192000 | -6.174266000 | 4.566472000  |
| 1 | -12.170930000 | -3.675993000 | 5.673424000  |
| 1 | -14.441352000 | -6.747666000 | 3.673027000  |
| 6 | -13.677980000 | -4.652968000 | 6.837186000  |
| 6 | -14.946027000 | -6.385215000 | 5.727756000  |
| 1 | -13.455021000 | -4.084532000 | 7.733606000  |
| 1 | -15.727698000 | -7.136915000 | 5.745004000  |
| 6 | -14.677938000 | -5.628235000 | 6.863545000  |
| 1 | -15.246473000 | -5.794999000 | 7.772437000  |
| 6 | -12.821535000 | -5.521799000 | -4.757079000 |
| 6 | -13.435585000 | -6.771887000 | -4.964649000 |
| 6 | -12.715875000 | -4.625386000 | -5.835990000 |
| 1 | -13.543783000 | -7.469067000 | -4.139136000 |
| 1 | -12.194105000 | -3.683286000 | -5.702084000 |
| 6 | -13.970639000 | -7.090373000 | -6.201309000 |
| 6 | -13.224867000 | -4.964695000 | -7.079273000 |
| 1 | -14.478709000 | -8.038021000 | -6.343072000 |
| 1 | -13.123668000 | -4.277549000 | -7.912214000 |
| 6 | -13.864317000 | -6.189363000 | -7.261191000 |
| 1 | -14.275494000 | -6.446798000 | -8.231721000 |
| 6 | 0.187546000   | 1.382579000  | 0.006946000  |
| 6 | 1.303767000   | 0.520225000  | -0.007628000 |
| 6 | -1.117690000  | 0.848810000  | -0.000554000 |
| 6 | 1.114689000   | -0.879243000 | -0.011610000 |
| 6 | -1.309794000  | -0.549598000 | 0.003838000  |
| 6 | -0.192457000  | -1.414654000 | 0.008119000  |
| 6 | 2.696593000   | 1.096643000  | -0.010548000 |
| 6 | 3.520530000   | 1.012817000  | 1.115061000  |
| 6 | 3.214688000   | 1.732301000  | -1.142354000 |
| 1 | 3.150431000   | 0.529095000  | 2.013409000  |
| 1 | 2.605082000   | 1.811507000  | -2.036799000 |
| 6 | 4.806489000   | 1.543174000  | 1.110802000  |
| 6 | 4.502959000   | 2.255673000  | -1.152548000 |
| 1 | 5.396631000   | 1.482797000  | 2.019749000  |
| 1 | 4.872775000   | 2.708387000  | -2.066991000 |
| 6 | 5.329602000   | 2.174977000  | -0.024675000 |
| 6 | 0.388471000   | 2.876840000  | 0.049028000  |
| 6 | 0.691657000   | 3.524919000  | 1.249041000  |
| 6 | 0.277587000   | 3.665890000  | -1.098428000 |
| 1 | 0.781877000   | 2.944656000  | 2.162050000  |
| 1 | 0.044432000   | 3.197793000  | -2.049694000 |
| 6 | 0.870384000   | 4.903170000  | 1.302065000  |
| 6 | 0.471418000   | 5.042613000  | -1.050702000 |
| 1 | 1.068428000   | 5.360502000  | 2.265859000  |
| 1 | 0.410134000   | 5.604236000  | -1.977103000 |
| 6 | 0.769476000   | 5.697047000  | 0.152009000  |
| 6 | -2.304917000  | 1.778007000  | -0.036159000 |
| 6 | -2.745701000  | 2.448995000  | 1.107366000  |
| 6 | -3.004423000  | 2.002662000  | -1.224456000 |
| 1 | -2.227518000  | 2.298520000  | 2.049270000  |

|   |              |              |              |
|---|--------------|--------------|--------------|
| 1 | -2.687453000 | 1.502203000  | -2.134065000 |
| 6 | -3.846092000 | 3.298816000  | 1.068253000  |
| 6 | -4.095758000 | 2.863691000  | -1.269370000 |
| 1 | -4.171037000 | 3.765974000  | 1.992185000  |
| 1 | -4.582078000 | 3.031302000  | -2.224792000 |
| 6 | -4.547550000 | 3.529565000  | -0.122487000 |
| 6 | -2.706542000 | -1.116633000 | -0.008253000 |
| 6 | -3.563117000 | -0.964602000 | 1.086111000  |
| 6 | -3.193797000 | -1.818412000 | -1.114891000 |
| 1 | -3.223021000 | -0.416933000 | 1.958942000  |
| 1 | -2.552427000 | -1.966685000 | -1.977675000 |
| 6 | -4.847475000 | -1.498490000 | 1.079952000  |
| 6 | -4.482928000 | -2.340791000 | -1.130308000 |
| 1 | -5.482775000 | -1.343956000 | 1.946593000  |
| 1 | -4.814028000 | -2.892091000 | -2.004999000 |
| 6 | -5.337541000 | -2.196400000 | -0.030534000 |
| 6 | -0.398040000 | -2.907693000 | 0.046252000  |
| 6 | -0.046657000 | -3.725497000 | -1.031619000 |
| 6 | -0.948031000 | -3.526627000 | 1.172925000  |
| 1 | 0.395482000  | -3.281366000 | -1.917635000 |
| 1 | -1.244422000 | -2.920806000 | 2.023189000  |
| 6 | -0.243350000 | -5.102114000 | -0.988836000 |
| 6 | -1.130029000 | -4.904357000 | 1.225552000  |
| 1 | 0.056379000  | -5.701192000 | -1.843227000 |
| 1 | -1.572019000 | -5.341155000 | 2.115766000  |
| 6 | -0.784810000 | -5.722916000 | 0.143421000  |
| 6 | 2.311209000  | -1.795917000 | -0.043706000 |
| 6 | 2.643396000  | -2.607187000 | 1.045029000  |
| 6 | 3.131369000  | -1.865227000 | -1.173933000 |
| 1 | 2.021272000  | -2.589569000 | 1.934098000  |
| 1 | 2.910490000  | -1.239997000 | -2.033007000 |
| 6 | 3.752050000  | -3.447042000 | 1.008839000  |
| 6 | 4.230488000  | -2.716009000 | -1.219689000 |
| 1 | 3.965465000  | -4.070821000 | 1.871455000  |
| 1 | 4.847165000  | -2.728103000 | -2.113098000 |
| 6 | 4.567387000  | -3.523830000 | -0.126942000 |
| 6 | -5.726332000 | 4.443419000  | -0.168175000 |
| 6 | -6.736538000 | 4.312996000  | -1.131416000 |
| 6 | -7.812529000 | 5.185896000  | -1.147177000 |
| 7 | -7.972373000 | 6.179802000  | -0.258229000 |
| 6 | -7.016394000 | 6.310884000  | 0.675969000  |
| 6 | -5.901742000 | 5.490225000  | 0.748001000  |
| 1 | -6.704372000 | 3.521048000  | -1.870039000 |
| 1 | -8.589818000 | 5.090111000  | -1.897932000 |
| 1 | -7.156016000 | 7.114531000  | 1.391599000  |
| 1 | -5.165574000 | 5.686819000  | 1.518296000  |
| 6 | 0.970909000  | 7.175099000  | 0.207346000  |
| 6 | 0.412581000  | 8.045183000  | -0.739894000 |
| 6 | 0.630298000  | 9.411525000  | -0.657226000 |
| 7 | 1.353446000  | 9.988097000  | 0.316450000  |
| 6 | 1.886937000  | 9.167255000  | 1.235695000  |
| 6 | 1.731832000  | 7.790309000  | 1.211674000  |
| 1 | -0.209845000 | 7.670781000  | -1.543787000 |
| 1 | 0.205416000  | 10.082271000 | -1.397046000 |
| 1 | 2.466939000  | 9.641994000  | 2.020490000  |
| 1 | 2.223646000  | 7.203707000  | 1.978333000  |
| 6 | 6.710020000  | 2.739356000  | -0.034482000 |
| 6 | 7.059027000  | 3.843230000  | -0.824733000 |
| 6 | 8.353885000  | 4.336943000  | -0.811058000 |



|   |              |               |              |
|---|--------------|---------------|--------------|
| 7 | 9.333396000  | 3.814264000   | -0.055365000 |
| 6 | 9.012781000  | 2.758330000   | 0.710003000  |
| 6 | 7.744092000  | 2.201475000   | 0.744423000  |
| 1 | 6.320890000  | 4.338770000   | -1.444361000 |
| 1 | 8.634462000  | 5.190052000   | -1.419847000 |
| 1 | 9.818444000  | 2.350088000   | 1.311426000  |
| 1 | 7.573983000  | 1.334071000   | 1.371358000  |
| 6 | 5.749110000  | -4.431809000  | -0.174412000 |
| 6 | 6.122669000  | -5.102953000  | -1.346711000 |
| 6 | 7.226061000  | -5.942042000  | -1.351038000 |
| 7 | 7.991273000  | -6.154849000  | -0.268612000 |
| 6 | 7.646767000  | -5.515243000  | 0.860468000  |
| 6 | 6.554197000  | -4.666450000  | 0.948558000  |
| 1 | 5.542804000  | -4.994656000  | -2.256198000 |
| 1 | 7.514468000  | -6.482022000  | -2.247199000 |
| 1 | 8.286127000  | -5.693692000  | 1.719212000  |
| 1 | 6.347914000  | -4.172749000  | 1.891413000  |
| 6 | -0.984816000 | -7.199492000  | 0.197953000  |
| 6 | -1.374008000 | -7.940977000  | -0.925867000 |
| 6 | -1.551207000 | -9.312771000  | -0.831390000 |
| 7 | -1.360939000 | -10.001816000 | 0.305200000  |
| 6 | -0.985259000 | -9.303811000  | 1.388907000  |
| 6 | -0.794291000 | -7.930905000  | 1.378156000  |
| 1 | -1.562774000 | -7.451693000  | -1.874663000 |
| 1 | -1.866174000 | -9.895680000  | -1.691080000 |
| 1 | -0.822657000 | -9.884269000  | 2.291351000  |
| 1 | -0.472945000 | -7.439228000  | 2.289282000  |
| 6 | -6.716619000 | -2.763451000  | -0.040241000 |
| 6 | -7.498737000 | -2.799928000  | -1.202679000 |
| 6 | -8.779504000 | -3.329503000  | -1.168440000 |
| 7 | -9.337059000 | -3.833004000  | -0.055491000 |
| 6 | -8.596843000 | -3.808571000  | 1.064613000  |
| 6 | -7.311620000 | -3.291562000  | 1.113763000  |
| 1 | -7.124263000 | -2.394910000  | -2.135895000 |
| 1 | -9.401738000 | -3.347303000  | -2.057432000 |
| 1 | -9.062974000 | -4.231722000  | 1.948705000  |
| 1 | -6.770046000 | -3.322817000  | 2.052289000  |

**c-P6·T6<sup>+12</sup>** optimized with **M06-2X** - E=-23375.711268au

|   |              |              |              |
|---|--------------|--------------|--------------|
| 6 | 9.348631000  | 8.782188000  | -1.308482000 |
| 6 | 9.133753000  | 9.353937000  | -2.626104000 |
| 6 | 9.981498000  | 8.713369000  | -3.460548000 |
| 6 | 10.650120000 | 7.684290000  | -2.665393000 |
| 7 | 10.271764000 | 7.740816000  | -1.395542000 |
| 1 | 8.495862000  | 10.199840000 | -2.842936000 |
| 1 | 10.178271000 | 8.940540000  | -4.496996000 |
| 6 | 11.682833000 | 6.761274000  | -3.167612000 |
| 6 | 12.108372000 | 5.653904000  | -2.463910000 |
| 6 | 13.024360000 | 4.643729000  | -2.965562000 |
| 7 | 11.710332000 | 5.301280000  | -1.170089000 |
| 6 | 13.174040000 | 3.721753000  | -1.980052000 |
| 1 | 13.468070000 | 4.641181000  | -3.951561000 |
| 6 | 12.356260000 | 4.181580000  | -0.884938000 |
| 1 | 13.788173000 | 2.832192000  | -1.980076000 |
| 6 | 12.306172000 | 3.521403000  | 0.426978000  |
| 6 | 12.053489000 | 4.167183000  | 1.612814000  |
| 6 | 12.284990000 | 3.647899000  | 2.951425000  |

|    |              |               |              |
|----|--------------|---------------|--------------|
| 7  | 11.648748000 | 5.501280000   | 1.691456000  |
| 6  | 12.076287000 | 4.678717000   | 3.799580000  |
| 1  | 12.622912000 | 2.647189000   | 3.182944000  |
| 6  | 11.674984000 | 5.817989000   | 2.974318000  |
| 1  | 12.186087000 | 4.695968000   | 4.874692000  |
| 6  | 11.320927000 | 7.139212000   | 3.521380000  |
| 6  | 10.573218000 | 8.057688000   | 2.809003000  |
| 6  | 10.271388000 | 9.413578000   | 3.229228000  |
| 7  | 10.042076000 | 7.852381000   | 1.526987000  |
| 6  | 9.532263000  | 9.980753000   | 2.241353000  |
| 1  | 10.630835000 | 9.882802000   | 4.133973000  |
| 6  | 9.441707000  | 8.988294000   | 1.201860000  |
| 1  | 9.156402000  | 10.992844000  | 2.183047000  |
| 6  | 8.873469000  | 9.284237000   | -0.121093000 |
| 30 | 10.465681000 | 6.332514000   | 0.152848000  |
| 6  | 7.812181000  | 10.222866000  | -0.147776000 |
| 6  | 6.800426000  | 10.899745000  | -0.129029000 |
| 6  | 12.596585000 | 2.134047000   | 0.448496000  |
| 6  | 12.711998000 | 0.922423000   | 0.436240000  |
| 6  | 11.618743000 | -6.790369000  | 3.376306000  |
| 6  | 10.892674000 | -7.712409000  | 2.644881000  |
| 6  | 11.921949000 | -5.442702000  | 2.864270000  |
| 6  | 10.649669000 | -9.090800000  | 3.025085000  |
| 7  | 10.335577000 | -7.488149000  | 1.377063000  |
| 6  | 12.273071000 | -4.308958000  | 3.721015000  |
| 7  | 11.887636000 | -5.096006000  | 1.590617000  |
| 6  | 9.919611000  | -9.657056000  | 2.028778000  |
| 1  | 11.040556000 | -9.573901000  | 3.909283000  |
| 6  | 9.777548000  | -8.638642000  | 1.022883000  |
| 30 | 10.708296000 | -5.919312000  | 0.041682000  |
| 6  | 12.438230000 | -3.248408000  | 2.901242000  |
| 1  | 12.379861000 | -4.350003000  | 4.795807000  |
| 6  | 12.232674000 | -3.742470000  | 1.548483000  |
| 1  | 9.582806000  | -10.680966000 | 1.943832000  |
| 6  | 9.206495000  | -8.912244000  | -0.303342000 |
| 7  | 11.911153000 | -4.812092000  | -1.259553000 |
| 7  | 10.570425000 | -7.306507000  | -1.535545000 |
| 1  | 12.730690000 | -2.239946000  | 3.159522000  |
| 6  | 12.455819000 | -3.056400000  | 0.380332000  |
| 6  | 9.664864000  | -8.366374000  | -1.477040000 |
| 6  | 8.167363000  | -9.875502000  | -0.352911000 |
| 6  | 12.534359000 | -3.686807000  | -0.945226000 |
| 6  | 12.332906000 | -5.133279000  | -2.554841000 |
| 6  | 10.934731000 | -7.198823000  | -2.804605000 |
| 6  | 12.683092000 | -1.658125000  | 0.428564000  |
| 6  | 9.449696000  | -8.897280000  | -2.812518000 |
| 6  | 7.176972000  | -10.583234000 | -0.360721000 |
| 6  | 13.354095000 | -3.189331000  | -2.021593000 |
| 6  | 13.233230000 | -4.095247000  | -3.026284000 |
| 6  | 11.944969000 | -6.238549000  | -3.281782000 |
| 6  | 10.278434000 | -8.213863000  | -3.630468000 |
| 6  | 12.743187000 | -0.442386000  | 0.428695000  |
| 1  | 8.825424000  | -9.746734000  | -3.053264000 |
| 1  | 13.950699000 | -2.288202000  | -1.997040000 |
| 1  | 13.688552000 | -4.065700000  | -4.006596000 |
| 1  | 10.470048000 | -8.401097000  | -4.675776000 |
| 6  | -5.571837000 | -11.498479000 | 0.025512000  |
| 6  | -6.769425000 | -10.844020000 | -0.001569000 |
| 6  | -4.463958000 | -12.001833000 | 0.055401000  |

|    |               |               |              |
|----|---------------|---------------|--------------|
| 6  | -7.790984000  | -10.183090000 | -0.034882000 |
| 6  | -3.116715000  | -12.440430000 | 0.046781000  |
| 6  | -8.881876000  | -9.277891000  | -0.045991000 |
| 6  | -2.439180000  | -12.547426000 | 1.236912000  |
| 6  | -2.558408000  | -12.815517000 | -1.259378000 |
| 6  | -9.493908000  | -8.968931000  | 1.252567000  |
| 6  | -9.322968000  | -8.786008000  | -1.251188000 |
| 6  | -3.005845000  | -12.490253000 | 2.573335000  |
| 7  | -1.086913000  | -12.887549000 | 1.315626000  |
| 6  | -3.335283000  | -13.443269000 | -2.296418000 |
| 7  | -1.275148000  | -12.714828000 | -1.570901000 |
| 7  | -10.191829000 | -7.870144000  | 1.492856000  |
| 6  | -9.458222000  | -9.860640000  | 2.385336000  |
| 7  | -10.302845000 | -7.798599000  | -1.364797000 |
| 6  | -8.968429000  | -9.275593000  | -2.573802000 |
| 6  | -2.016335000  | -12.855804000 | 3.420253000  |
| 1  | -4.038333000  | -12.267404000 | 2.805419000  |
| 6  | -0.832933000  | -13.095029000 | 2.597315000  |
| 30 | 0.233310000   | -12.240898000 | -0.180928000 |
| 6  | -2.448101000  | -13.772897000 | -3.270803000 |
| 1  | -4.391111000  | -13.671170000 | -2.246612000 |
| 6  | -1.149558000  | -13.285259000 | -2.843715000 |
| 6  | -10.676464000 | -8.003643000  | 2.796646000  |
| 30 | -10.489950000 | -6.315061000  | 0.126004000  |
| 6  | -10.203118000 | -9.261601000  | 3.349354000  |
| 1  | -8.951401000  | -10.814675000 | 2.423940000  |
| 6  | -10.594998000 | -7.715055000  | -2.651873000 |
| 6  | -9.775959000  | -8.630764000  | -3.445462000 |
| 1  | -8.247525000  | -10.055166000 | -2.778846000 |
| 1  | -2.062096000  | -12.975339000 | 4.493590000  |
| 6  | 0.473196000   | -13.503627000 | 3.144158000  |
| 7  | 1.758189000   | -12.706608000 | 1.193927000  |
| 7  | 1.573843000   | -12.793008000 | -1.696254000 |
| 1  | -2.639294000  | -14.340893000 | -4.170122000 |
| 6  | 0.035502000   | -13.405028000 | -3.544686000 |
| 6  | -11.440907000 | -7.077382000  | 3.475624000  |
| 7  | -11.639385000 | -5.427415000  | 1.648122000  |
| 7  | -11.671246000 | -5.296384000  | -1.271399000 |
| 1  | -10.398855000 | -9.613236000  | 4.352862000  |
| 6  | -11.601161000 | -6.807195000  | -3.228436000 |
| 1  | -9.839895000  | -8.754170000  | -4.517289000 |
| 6  | 1.652888000   | -13.320672000 | 2.448399000  |
| 6  | 3.044040000   | -12.751894000 | 0.880760000  |
| 6  | 1.326939000   | -12.969440000 | -2.984259000 |
| 6  | 2.913296000   | -12.408997000 | -1.605764000 |
| 6  | -11.770033000 | -5.749580000  | 2.929164000  |
| 6  | -12.146172000 | -4.135232000  | 1.515723000  |
| 6  | -12.391037000 | -4.220686000  | -0.991341000 |
| 6  | -12.083918000 | -5.707025000  | -2.546826000 |
| 6  | 2.968342000   | -13.774935000 | 2.861358000  |
| 6  | 3.843000000   | -13.383596000 | 1.898803000  |
| 6  | 3.588411000   | -12.316330000 | -0.412504000 |
| 6  | 2.501045000   | -12.664490000 | -3.797995000 |
| 6  | 3.477473000   | -12.291615000 | -2.939010000 |
| 6  | -12.376608000 | -4.656016000  | 3.686236000  |
| 6  | -12.554469000 | -3.636466000  | 2.816900000  |
| 6  | -12.384628000 | -3.529236000  | 0.305111000  |
| 6  | -13.300664000 | -3.869012000  | -2.052059000 |
| 6  | -13.137526000 | -4.819917000  | -3.006738000 |

|    |               |               |              |
|----|---------------|---------------|--------------|
| 1  | 3.179744000   | -14.363228000 | 3.742924000  |
| 1  | 4.906459000   | -13.570925000 | 1.843114000  |
| 6  | 4.919403000   | -11.831846000 | -0.410044000 |
| 1  | 2.551141000   | -12.748883000 | -4.874440000 |
| 1  | 4.501870000   | -12.027371000 | -3.163042000 |
| 1  | -12.672026000 | -4.691904000  | 4.723583000  |
| 1  | -13.016041000 | -2.675861000  | 3.000770000  |
| 6  | -12.724323000 | -2.153801000  | 0.281631000  |
| 1  | -14.017125000 | -3.059648000  | -2.028007000 |
| 1  | -13.710035000 | -4.946262000  | -3.914535000 |
| 6  | 6.007743000   | -11.287159000 | -0.380454000 |
| 6  | -12.846674000 | -0.944051000  | 0.218305000  |
| 6  | -12.867377000 | 0.418635000   | 0.147151000  |
| 6  | -12.780808000 | 1.630506000   | 0.069739000  |
| 6  | -12.492916000 | 3.016910000   | 0.005515000  |
| 6  | -12.329457000 | 3.602220000   | -1.226673000 |
| 6  | -12.480305000 | 3.738608000   | 1.285607000  |
| 6  | -12.755818000 | 3.047933000   | -2.499908000 |
| 7  | -11.890094000 | 4.912812000   | -1.411022000 |
| 7  | -11.787979000 | 4.844435000   | 1.520347000  |
| 6  | -13.353638000 | 3.389229000   | 2.375728000  |
| 6  | -12.648067000 | 4.046145000   | -3.403489000 |
| 1  | -13.176255000 | 2.061818000   | -2.641806000 |
| 6  | -12.067124000 | 5.186995000   | -2.696318000 |
| 30 | -10.723520000 | 5.880364000   | 0.046365000  |
| 6  | -12.194604000 | 5.284047000   | 2.788950000  |
| 6  | -13.204222000 | 4.374586000   | 3.298191000  |
| 1  | -14.042992000 | 2.556372000   | 2.391262000  |
| 1  | -12.972691000 | 4.037285000   | -4.432571000 |
| 6  | -11.798774000 | 6.507089000   | -3.292867000 |
| 7  | -10.488435000 | 7.383196000   | -1.385863000 |
| 7  | -10.555403000 | 7.418305000   | 1.483134000  |
| 6  | -11.755048000 | 6.435141000   | 3.415432000  |
| 1  | -13.764318000 | 4.509562000   | 4.212518000  |
| 6  | -11.030255000 | 7.469755000   | -2.672647000 |
| 6  | -9.834980000  | 8.517904000   | -1.191553000 |
| 6  | -9.605258000  | 8.427389000   | 1.312242000  |
| 6  | -10.805375000 | 7.365037000   | 2.779699000  |
| 6  | -10.628302000 | 8.732512000   | -3.268312000 |
| 6  | -9.877176000  | 9.384082000   | -2.343669000 |
| 6  | -9.203609000  | 8.888841000   | 0.082334000  |
| 6  | -9.233653000  | 8.972047000   | 2.608410000  |
| 6  | -9.996768000  | 8.332300000   | 3.521674000  |
| 1  | -10.875988000 | 9.054280000   | -4.270403000 |
| 1  | -9.414608000  | 10.358157000  | -2.419449000 |
| 6  | -8.146828000  | 9.830834000   | 0.010990000  |
| 1  | -8.529559000  | 9.776996000   | 2.768316000  |
| 1  | -10.035689000 | 8.487146000   | 4.590638000  |
| 6  | -7.156846000  | 10.532532000  | -0.083741000 |
| 6  | -5.992165000  | 11.238385000  | -0.177363000 |
| 6  | -4.911098000  | 11.790728000  | -0.264853000 |
| 6  | -3.585308000  | 12.289547000  | -0.316091000 |
| 6  | -2.956665000  | 12.395630000  | -1.532813000 |
| 6  | -2.998146000  | 12.713848000  | 0.962397000  |
| 6  | -3.575402000  | 12.283162000  | -2.844081000 |
| 7  | -1.616859000  | 12.762194000  | -1.676986000 |
| 7  | -1.695624000  | 12.767461000  | 1.191609000  |
| 6  | -3.775724000  | 13.190636000  | 2.079337000  |
| 6  | -2.628699000  | 12.635080000  | -3.741650000 |

|    |              |              |              |
|----|--------------|--------------|--------------|
| 1  | -4.610900000 | 12.030198000 | -3.025911000 |
| 6  | -1.417029000 | 12.921452000 | -2.973537000 |
| 30 | -0.218985000 | 12.233376000 | -0.184922000 |
| 6  | -1.554359000 | 13.325121000 | 2.466665000  |
| 6  | -2.874474000 | 13.578120000 | 3.018148000  |
| 1  | -4.854706000 | 13.239342000 | 2.123578000  |
| 1  | -2.717936000 | 12.711617000 | -4.816067000 |
| 6  | -0.134018000 | 13.310143000 | -3.584825000 |
| 7  | 1.234053000  | 12.650058000 | -1.631913000 |
| 7  | 1.141122000  | 12.852984000 | 1.292901000  |
| 6  | -0.361672000 | 13.571139000 | 3.113844000  |
| 1  | -3.070790000 | 13.977815000 | 4.003460000  |
| 6  | 1.071082000  | 13.179866000 | -2.920582000 |
| 6  | 2.528190000  | 12.750699000 | -1.364087000 |
| 6  | 2.508957000  | 12.621212000 | 1.152925000  |
| 6  | 0.946189000  | 13.172969000 | 2.565000000  |
| 6  | 2.361260000  | 13.632759000 | -3.407019000 |
| 6  | 3.275893000  | 13.329341000 | -2.450279000 |
| 6  | 3.136113000  | 12.457189000 | -0.058510000 |
| 6  | 3.162648000  | 12.772750000 | 2.441163000  |
| 6  | 2.205840000  | 13.170413000 | 3.307906000  |
| 1  | 2.529263000  | 14.165189000 | -4.332348000 |
| 1  | 4.334767000  | 13.547977000 | -2.442577000 |
| 6  | 4.495677000  | 12.057454000 | -0.074857000 |
| 1  | 4.226363000  | 12.685841000 | 2.615146000  |
| 1  | 2.337207000  | 13.481242000 | 4.332926000  |
| 6  | 5.606465000  | 11.560341000 | -0.108351000 |
| 6  | -0.192242000 | 13.843180000 | -4.945698000 |
| 6  | 0.702236000  | 13.408996000 | -5.944770000 |
| 6  | -1.138491000 | 14.842508000 | -5.257125000 |
| 1  | 1.392013000  | 12.597701000 | -5.730386000 |
| 1  | -1.819549000 | 15.204340000 | -4.491028000 |
| 6  | 0.660831000  | 13.972074000 | -7.211849000 |
| 6  | -1.149905000 | 15.424651000 | -6.515312000 |
| 1  | 1.336097000  | 13.620391000 | -7.984365000 |
| 1  | -1.849651000 | 16.223594000 | -6.735960000 |
| 6  | -0.253197000 | 14.988933000 | -7.495168000 |
| 1  | -0.273150000 | 15.438777000 | -8.482674000 |
| 6  | -0.375058000 | 14.348194000 | 4.361028000  |
| 6  | -0.987074000 | 15.618855000 | 4.351998000  |
| 6  | 0.196695000  | 13.867238000 | 5.555071000  |
| 1  | -1.397656000 | 16.008966000 | 3.425020000  |
| 1  | 0.620881000  | 12.867708000 | 5.593021000  |
| 6  | -1.001753000 | 16.397364000 | 5.502578000  |
| 6  | 0.144956000  | 14.636061000 | 6.706904000  |
| 1  | -1.444221000 | 17.387552000 | 5.479486000  |
| 1  | 0.555023000  | 14.250186000 | 7.634091000  |
| 6  | -0.439065000 | 15.908081000 | 6.680027000  |
| 1  | -0.451987000 | 16.515280000 | 7.579413000  |
| 6  | 12.347553000 | 7.099047000  | -4.433994000 |
| 6  | 11.634564000 | 7.267396000  | -5.636992000 |
| 6  | 13.749084000 | 7.255951000  | -4.434896000 |
| 1  | 10.562235000 | 7.094759000  | -5.664407000 |
| 1  | 14.299121000 | 7.162417000  | -3.502794000 |
| 6  | 12.311429000 | 7.573837000  | -6.806786000 |
| 6  | 14.414598000 | 7.598810000  | -5.605316000 |
| 1  | 11.765070000 | 7.670068000  | -7.738987000 |
| 1  | 15.488513000 | 7.751443000  | -5.591356000 |
| 6  | 13.699314000 | 7.756143000  | -6.791127000 |

|   |               |               |              |
|---|---------------|---------------|--------------|
| 1 | 14.219132000  | 8.022724000   | -7.705740000 |
| 6 | 11.798717000  | 7.438103000   | 4.871059000  |
| 6 | 10.952015000  | 8.012308000   | 5.840700000  |
| 6 | 13.146773000  | 7.181860000   | 5.200315000  |
| 1 | 9.899197000   | 8.155802000   | 5.615016000  |
| 1 | 13.818008000  | 6.760990000   | 4.456012000  |
| 6 | 11.446103000  | 8.335250000   | 7.095994000  |
| 6 | 13.641084000  | 7.539923000   | 6.445003000  |
| 1 | 10.786542000  | 8.756406000   | 7.847017000  |
| 1 | 14.688615000  | 7.381335000   | 6.677746000  |
| 6 | 12.791835000  | 8.113764000   | 7.395578000  |
| 1 | 13.179601000  | 8.381197000   | 8.373343000  |
| 6 | 12.630501000  | -6.537599000  | -4.547115000 |
| 6 | 14.034836000  | -6.665995000  | -4.534951000 |
| 6 | 11.934105000  | -6.695243000  | -5.761233000 |
| 1 | 14.572680000  | -6.579816000  | -3.595037000 |
| 1 | 10.859339000  | -6.540790000  | -5.797944000 |
| 6 | 14.719969000  | -6.971442000  | -5.704400000 |
| 6 | 12.630081000  | -6.964007000  | -6.929100000 |
| 1 | 15.796612000  | -7.102179000  | -5.681430000 |
| 1 | 12.096131000  | -7.051149000  | -7.869355000 |
| 6 | 14.021051000  | -7.119052000  | -6.901219000 |
| 1 | 14.556229000  | -7.356300000  | -7.815039000 |
| 6 | 12.123317000  | -7.110775000  | 4.710019000  |
| 6 | 11.312392000  | -7.748962000  | 5.670813000  |
| 6 | 13.463396000  | -6.807450000  | 5.033474000  |
| 1 | 10.263305000  | -7.927025000  | 5.452884000  |
| 1 | 14.107775000  | -6.335933000  | 4.295828000  |
| 6 | 11.834278000  | -8.088487000  | 6.910183000  |
| 6 | 13.986849000  | -7.182308000  | 6.260960000  |
| 1 | 11.201467000  | -8.558329000  | 7.655307000  |
| 1 | 15.029390000  | -6.986693000  | 6.487827000  |
| 6 | 13.173280000  | -7.820126000  | 7.202116000  |
| 1 | 13.583171000  | -8.100177000  | 8.167262000  |
| 6 | 0.064188000   | -13.971680000 | -4.891641000 |
| 6 | 1.030697000   | -14.949154000 | -5.212121000 |
| 6 | -0.878984000  | -13.591931000 | -5.868531000 |
| 1 | 1.749419000   | -15.269823000 | -4.462294000 |
| 1 | -1.584408000  | -12.795371000 | -5.650397000 |
| 6 | 1.015462000   | -15.564101000 | -6.454331000 |
| 6 | -0.864429000  | -14.186751000 | -7.121394000 |
| 1 | 1.731669000   | -16.346857000 | -6.680057000 |
| 1 | -1.576964000  | -13.876214000 | -7.877910000 |
| 6 | 0.070756000   | -15.182368000 | -7.411622000 |
| 1 | 0.069910000   | -15.657479000 | -8.387443000 |
| 6 | 0.464124000   | -14.114176000 | 4.472361000  |
| 6 | 1.392639000   | -13.733025000 | 5.462424000  |
| 6 | -0.467571000  | -15.134648000 | 4.759517000  |
| 1 | 2.070037000   | -12.905847000 | 5.270951000  |
| 1 | -1.174144000  | -15.456033000 | 3.998513000  |
| 6 | 1.398181000   | -14.367944000 | 6.695592000  |
| 6 | -0.431731000  | -15.788115000 | 5.981518000  |
| 1 | 2.099049000   | -14.057176000 | 7.462823000  |
| 1 | -1.120198000  | -16.602334000 | 6.180731000  |
| 6 | 0.498325000   | -15.404450000 | 6.952194000  |
| 1 | 0.515224000   | -15.910291000 | 7.912277000  |
| 6 | -12.074119000 | -7.125851000  | -4.576375000 |
| 6 | -12.476454000 | -8.444751000  | -4.874790000 |
| 6 | -12.174210000 | -6.134641000  | -5.573065000 |

|   |               |              |              |
|---|---------------|--------------|--------------|
| 1 | -12.427965000 | -9.214864000 | -4.109069000 |
| 1 | -11.810117000 | -5.131744000 | -5.369139000 |
| 6 | -13.011697000 | -8.746360000 | -6.117664000 |
| 6 | -12.678312000 | -6.452856000 | -6.825864000 |
| 1 | -13.361225000 | -9.751646000 | -6.327172000 |
| 1 | -12.734037000 | -5.692516000 | -7.597388000 |
| 6 | -13.110605000 | -7.752642000 | -7.095871000 |
| 1 | -13.519325000 | -7.995306000 | -8.071545000 |
| 6 | -12.040445000 | -7.456661000 | 4.761890000  |
| 6 | -12.835469000 | -8.620862000 | 4.813295000  |
| 6 | -11.846115000 | -6.702765000 | 5.936000000  |
| 1 | -13.017757000 | -9.185418000 | 3.903328000  |
| 1 | -11.190551000 | -5.836393000 | 5.925334000  |
| 6 | -13.440668000 | -9.003855000 | 6.003649000  |
| 6 | -12.424369000 | -7.112907000 | 7.126538000  |
| 1 | -14.078339000 | -9.881096000 | 6.027941000  |
| 1 | -12.245864000 | -6.550820000 | 8.036978000  |
| 6 | -13.235357000 | -8.253824000 | 7.160307000  |
| 1 | -13.706750000 | -8.553586000 | 8.090754000  |
| 6 | -12.463811000 | 6.835298000  | -4.561530000 |
| 6 | -12.294050000 | 6.059621000  | -5.724935000 |
| 6 | -13.298250000 | 7.971587000  | -4.605640000 |
| 1 | -11.610550000 | 5.215079000  | -5.722793000 |
| 1 | -13.460689000 | 8.552217000  | -3.702022000 |
| 6 | -12.935071000 | 6.421865000  | -6.898985000 |
| 6 | -13.965163000 | 8.305822000  | -5.777681000 |
| 1 | -12.776426000 | 5.843506000  | -7.802897000 |
| 1 | -14.631741000 | 9.161485000  | -5.794918000 |
| 6 | -13.783883000 | 7.534882000  | -6.924501000 |
| 1 | -14.303287000 | 7.796790000  | -7.840700000 |
| 6 | -12.215896000 | 6.787170000  | 4.758139000  |
| 6 | -12.661187000 | 8.101635000  | 5.013595000  |
| 6 | -12.262788000 | 5.832625000  | 5.794280000  |
| 1 | -12.653120000 | 8.842789000  | 4.218431000  |
| 1 | -11.864995000 | 4.836397000  | 5.623261000  |
| 6 | -13.186615000 | 8.431677000  | 6.253299000  |
| 6 | -12.757385000 | 6.180651000  | 7.042623000  |
| 1 | -13.568882000 | 9.431189000  | 6.430785000  |
| 1 | -12.771770000 | 5.449697000  | 7.843838000  |
| 6 | -13.232929000 | 7.473696000  | 7.270246000  |
| 1 | -13.633863000 | 7.739167000  | 8.243222000  |
| 6 | 0.031335000   | -1.399776000 | 0.000993000  |
| 6 | 1.240632000   | -0.669415000 | 0.004268000  |
| 6 | -1.206473000  | -0.719351000 | 0.009902000  |
| 6 | 1.212910000   | 0.744690000  | 0.007566000  |
| 6 | -1.237545000  | 0.694137000  | 0.010057000  |
| 6 | -0.026746000  | 1.427027000  | 0.003501000  |
| 6 | 2.557675000   | -1.402216000 | 0.002410000  |
| 6 | 3.418737000   | -1.346823000 | -1.100077000 |
| 6 | 2.963894000   | -2.157920000 | 1.108951000  |
| 1 | 3.129520000   | -0.773711000 | -1.976754000 |
| 1 | 2.321363000   | -2.214498000 | 1.983407000  |
| 6 | 4.636560000   | -2.022543000 | -1.097772000 |
| 6 | 4.187325000   | -2.822368000 | 1.118631000  |
| 1 | 5.256770000   | -1.984112000 | -1.988627000 |
| 1 | 4.481294000   | -3.361849000 | 2.014258000  |
| 6 | 5.049682000   | -2.771171000 | 0.013854000  |
| 6 | 0.060625000   | -2.907161000 | -0.019218000 |
| 6 | 0.438425000   | -3.604995000 | -1.172150000 |

|   |              |              |              |
|---|--------------|--------------|--------------|
| 6 | -0.290155000 | -3.657069000 | 1.109287000  |
| 1 | 0.712440000  | -3.052211000 | -2.066699000 |
| 1 | -0.584089000 | -3.145788000 | 2.022057000  |
| 6 | 0.453475000  | -4.997254000 | -1.199811000 |
| 6 | -0.253005000 | -5.049089000 | 1.089850000  |
| 1 | 0.711433000  | -5.492979000 | -2.130687000 |
| 1 | -0.491814000 | -5.585370000 | 2.003201000  |
| 6 | 0.113820000  | -5.752407000 | -0.067390000 |
| 6 | -2.491595000 | -1.507205000 | 0.027390000  |
| 6 | -2.913736000 | -2.230968000 | -1.094107000 |
| 6 | -3.302804000 | -1.541098000 | 1.167453000  |
| 1 | -2.308576000 | -2.220987000 | -1.996659000 |
| 1 | -2.999806000 | -0.994200000 | 2.056196000  |
| 6 | -4.106888000 | -2.948546000 | -1.081779000 |
| 6 | -4.486103000 | -2.275161000 | 1.187971000  |
| 1 | -4.415891000 | -3.458204000 | -1.989506000 |
| 1 | -5.061995000 | -2.306386000 | 2.108061000  |
| 6 | -4.918504000 | -2.990401000 | 0.061518000  |
| 6 | -2.560816000 | 1.416094000  | 0.022065000  |
| 6 | -3.458787000 | 1.300635000  | -1.046635000 |
| 6 | -2.932614000 | 2.229641000  | 1.099769000  |
| 1 | -3.204253000 | 0.670755000  | -1.894476000 |
| 1 | -2.253516000 | 2.348198000  | 1.939564000  |
| 6 | -4.674128000 | 1.980538000  | -1.044645000 |
| 6 | -4.154970000 | 2.897213000  | 1.111749000  |
| 1 | -5.348990000 | 1.854754000  | -1.886701000 |
| 1 | -4.400136000 | 3.531623000  | 1.959003000  |
| 6 | -5.048215000 | 2.790643000  | 0.036532000  |
| 6 | -0.060029000 | 2.934032000  | -0.014610000 |
| 6 | 0.456961000  | 3.687626000  | 1.046605000  |
| 6 | -0.610496000 | 3.628363000  | -1.099408000 |
| 1 | 0.901167000  | 3.178951000  | 1.897817000  |
| 1 | -1.029082000 | 3.071886000  | -1.933507000 |
| 6 | 0.416473000  | 5.079784000  | 1.029075000  |
| 6 | -0.634639000 | 5.020425000  | -1.127850000 |
| 1 | 0.839462000  | 5.629762000  | 1.865142000  |
| 1 | -1.081676000 | 5.522409000  | -1.981403000 |
| 6 | -0.125687000 | 5.774364000  | -0.061283000 |
| 6 | 2.506552000  | 1.518573000  | 0.019243000  |
| 6 | 2.871045000  | 2.346253000  | -1.049949000 |
| 6 | 3.385775000  | 1.433047000  | 1.106300000  |
| 1 | 2.205179000  | 2.442963000  | -1.903081000 |
| 1 | 3.136267000  | 0.792025000  | 1.947323000  |
| 6 | 4.070598000  | 3.054217000  | -1.037077000 |
| 6 | 4.576818000  | 2.154057000  | 1.129573000  |
| 1 | 4.311766000  | 3.697307000  | -1.878940000 |
| 1 | 5.238236000  | 2.051071000  | 1.985309000  |
| 6 | 4.945250000  | 2.976356000  | 0.055765000  |
| 6 | -6.194013000 | -3.763993000 | 0.078001000  |
| 6 | -7.249526000 | -3.444471000 | 0.945368000  |
| 6 | -8.418883000 | -4.192811000 | 0.935411000  |
| 7 | -8.624529000 | -5.232599000 | 0.108836000  |
| 6 | -7.624495000 | -5.543256000 | -0.733920000 |
| 6 | -6.418225000 | -4.856640000 | -0.773546000 |
| 1 | -7.180174000 | -2.601732000 | 1.623787000  |
| 1 | -9.232416000 | -3.949826000 | 1.613885000  |
| 1 | -7.800557000 | -6.381693000 | -1.403123000 |
| 1 | -5.653355000 | -5.193635000 | -1.464052000 |
| 6 | 0.141413000  | -7.244679000 | -0.093097000 |



|   |              |               |              |
|---|--------------|---------------|--------------|
| 6 | -0.602401000 | -8.023016000  | 0.807263000  |
| 6 | -0.541589000 | -9.409332000  | 0.756830000  |
| 7 | 0.193200000  | -10.085065000 | -0.143049000 |
| 6 | 0.902510000  | -9.351850000  | -1.018006000 |
| 6 | 0.912662000  | -7.963329000  | -1.019678000 |
| 1 | -1.247408000 | -7.562246000  | 1.546652000  |
| 1 | -1.108632000 | -10.008699000 | 1.464942000  |
| 1 | 1.490630000  | -9.905102000  | -1.746176000 |
| 1 | 1.539778000  | -7.453616000  | -1.742150000 |
| 6 | 6.357869000  | -3.486893000  | 0.023082000  |
| 6 | 6.565483000  | -4.648620000  | 0.781713000  |
| 6 | 7.800133000  | -5.283760000  | 0.769570000  |
| 7 | 8.844419000  | -4.849096000  | 0.043213000  |
| 6 | 8.657910000  | -3.739652000  | -0.692386000 |
| 6 | 7.458334000  | -3.040985000  | -0.724564000 |
| 1 | 5.764792000  | -5.078518000  | 1.373236000  |
| 1 | 7.971101000  | -6.180342000  | 1.359259000  |
| 1 | 9.512170000  | -3.403672000  | -1.274186000 |
| 1 | 7.396866000  | -2.138539000  | -1.322583000 |
| 6 | 6.223959000  | 3.742694000   | 0.077975000  |
| 6 | 6.740411000  | 4.287331000   | 1.263190000  |
| 6 | 7.933082000  | 4.998808000   | 1.242227000  |
| 7 | 8.649008000  | 5.198084000   | 0.122693000  |
| 6 | 8.167090000  | 4.677975000   | -1.018766000 |
| 6 | 6.979587000  | 3.960442000   | -1.083775000 |
| 1 | 6.205988000  | 4.183950000   | 2.201556000  |
| 1 | 8.334178000  | 5.440582000   | 2.150917000  |
| 1 | 8.767677000  | 4.842024000   | -1.909964000 |
| 1 | 6.661630000  | 3.553952000   | -2.038010000 |
| 6 | -0.158623000 | 7.264740000   | -0.087059000 |
| 6 | -0.367419000 | 8.022508000   | 1.074880000  |
| 6 | -0.390933000 | 9.409667000   | 1.007771000  |
| 7 | -0.214742000 | 10.092228000  | -0.136263000 |
| 6 | -0.012272000 | 9.377894000   | -1.256309000 |
| 6 | 0.018715000  | 7.989425000   | -1.275075000 |
| 1 | -0.536358000 | 7.538873000   | 2.031124000  |
| 1 | -0.563998000 | 10.007109000  | 1.899274000  |
| 1 | 0.142057000  | 9.951377000   | -2.166887000 |
| 1 | 0.208100000  | 7.480048000   | -2.213948000 |
| 6 | -6.351987000 | 3.514108000   | 0.040398000  |
| 6 | -7.087481000 | 3.713856000   | 1.218236000  |
| 6 | -8.301953000 | 4.386769000   | 1.176772000  |
| 7 | -8.829880000 | 4.879193000   | 0.043350000  |
| 6 | -8.132518000 | 4.699159000   | -1.091154000 |
| 6 | -6.914677000 | 4.032940000   | -1.135439000 |
| 1 | -6.733462000 | 3.325569000   | 2.167323000  |
| 1 | -8.889697000 | 4.532468000   | 2.079631000  |
| 1 | -8.572549000 | 5.115227000   | -1.993941000 |
| 1 | -6.398966000 | 3.942486000   | -2.085515000 |
